# Supplementary material for: Classification of COVID-19 Patients into Clinically Relevant Subsets by a Novel Machine Learning Pipeline Using Transcriptomic Features
Source: MDPI journal article supplement (doi:10.3390/ijms24054905), 2023-03-03
Supplement: s1 [file s1]

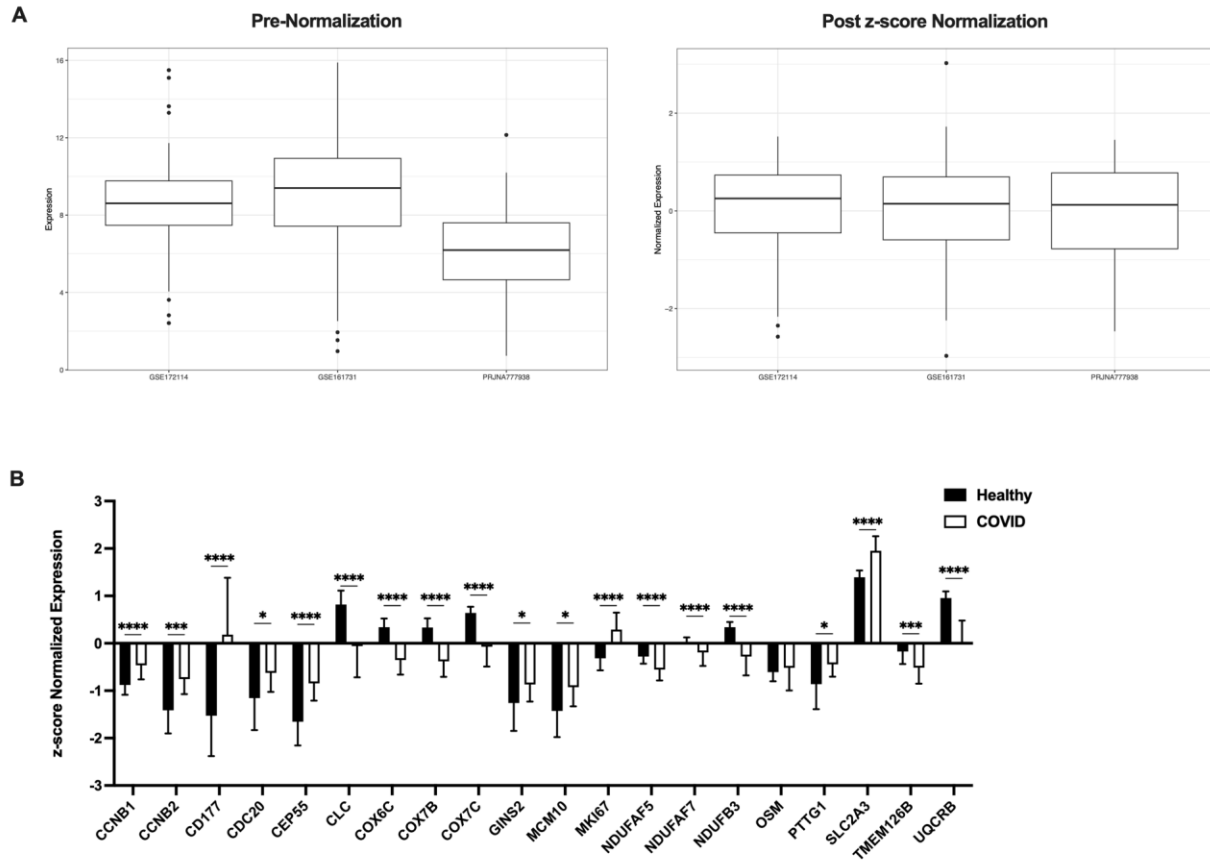

**Figure S1: Normalized gene expression values from classification of all COVID patients vs healthy individuals. (A)** Boxplots of gene expression values for COVID and healthy samples from 3 publicly available datasets pre- and post- z-score normalization. **(B)** Bar graphs comparing normalized expression values of the top 20 gene features resulting from the iterative ML pipeline comparing all COVID patients and healthy individuals. \* $p < 0.05$ , \*\* $p < 0.01$ , \*\*\* $p < 0.001$ , \*\*\*\* $p < 0.0001$

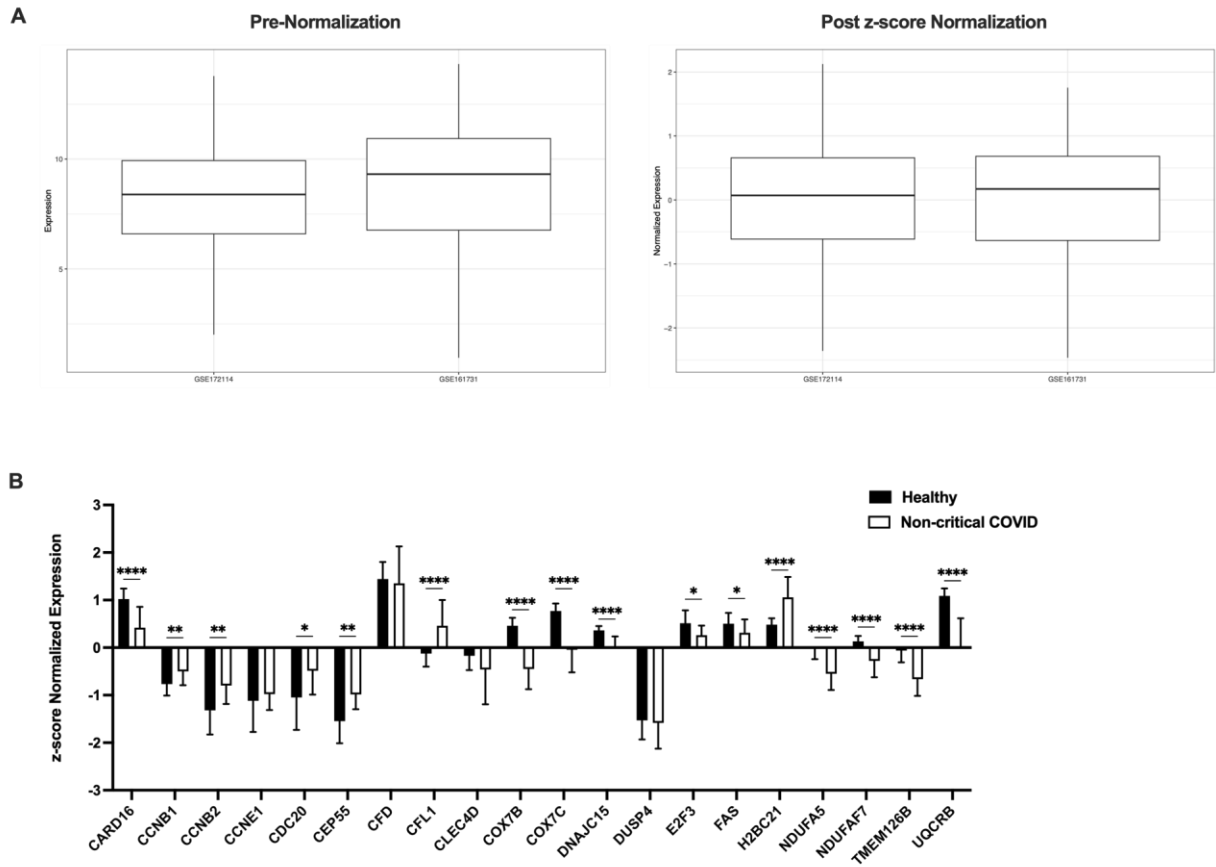

**Figure S2: Normalized gene expression values from classification of non-critical COVID patients vs healthy individuals. (A)** Boxplots of gene expression values for non-critical COVID and healthy samples from 2 publicly available datasets pre- and post- z-score normalization. **(B)** Bar graphs comparing normalized expression values of the top 20 gene features resulting from the iterative ML pipeline comparing non-critical COVID patients and healthy individuals. \* $p < 0.05$ , \*\* $p < 0.01$ , \*\*\* $p < 0.001$ , \*\*\*\* $p < 0.0001$

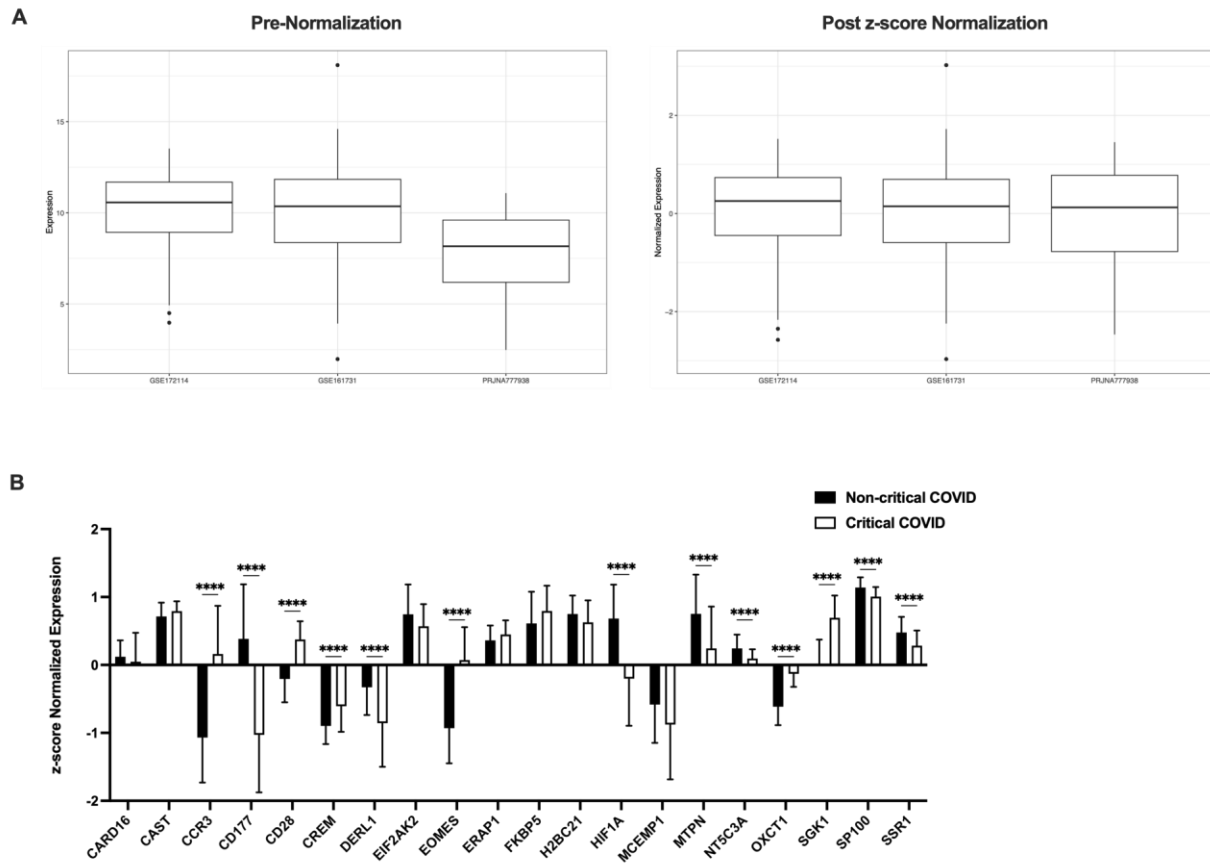

**Figure S3: Normalized gene expression values from classification of critical vs non-critical COVID patients. (A)** Boxplots of gene expression values for critical and non-critical COVID samples from 3 publicly available datasets pre- and post- z-score normalization. **(B)** Bar graphs comparing normalized expression values of the top 20 gene features resulting from the iterative ML pipeline comparing critical and non-critical COVID patients. \* $p < 0.05$ , \*\* $p < 0.01$ , \*\*\* $p < 0.001$ , \*\*\*\* $p < 0.0001$

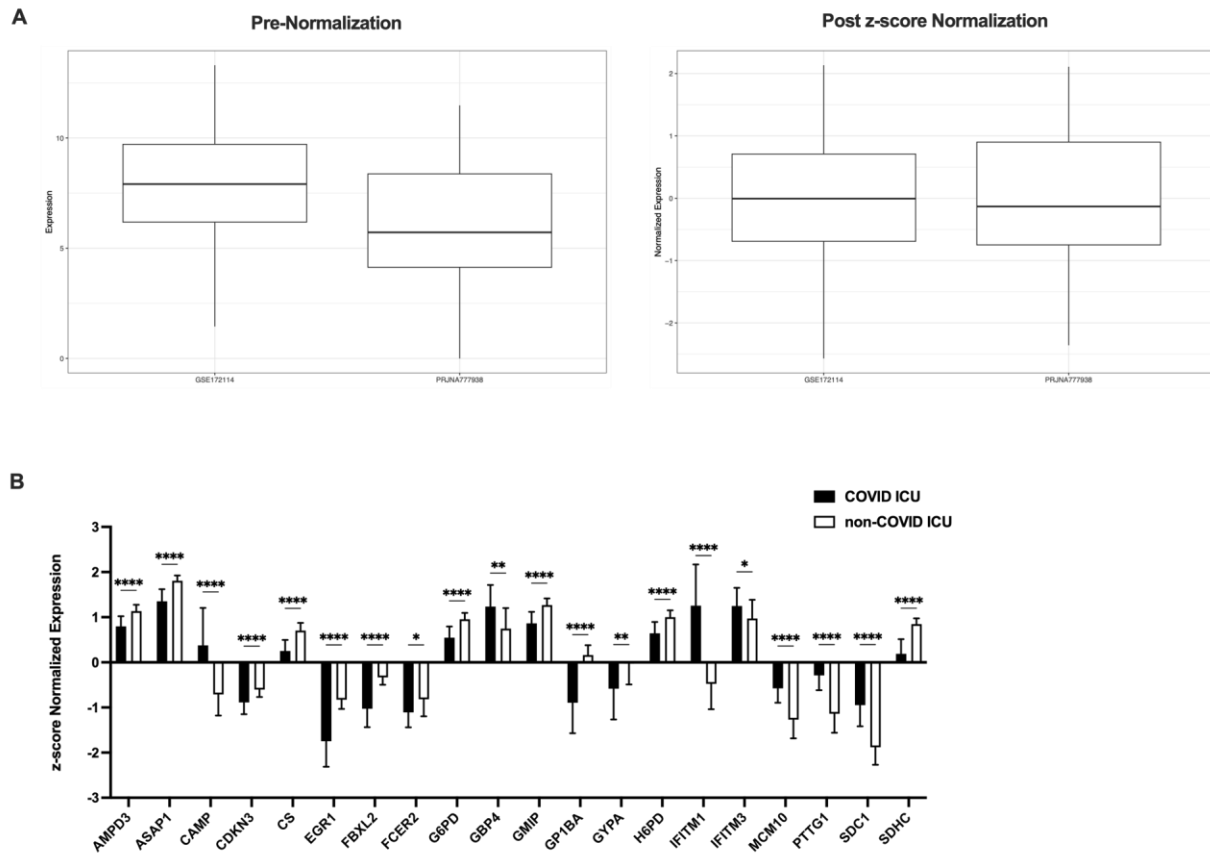

**Figure S4: Normalized gene expression values from classification of COVID vs non-COVID ICU patients.** (A) Boxplots of gene expression values for COVID and non-COVID ICU samples from 2 publicly available datasets pre- and post- z-score normalization. (B) Bar graphs comparing normalized expression values of the top 20 gene features resulting from the iterative ML pipeline comparing COVID and non-COVID ICU patients. \* $p < 0.05$ , \*\* $p < 0.01$ , \*\*\* $p < 0.001$ , \*\*\*\* $p < 0.0001$
