# Supplementary material for: Classification of COVID-19 Patients into Clinically Relevant Subsets by a Novel Machine Learning Pipeline Using Transcriptomic Features
Source: Int J Mol Sci. 2023 Mar 3;24(5):4905. doi: 10.3390/ijms24054905 (PMC10002748; doi:10.3390/ijms24054905)
Supplement: Supplementary file 1 [file ijms-24-04905-s001.zip]

Archive with 4 entries (4 files):
- Supplemental Figures.pdf
- Table S1-Input Gene Modules.xlsx
- Table S2-Machine Learning Algorithm Performance.xlsx
- Table S3-Machine Learning Feature Importance.xlsx
