# Supplementary material for: Classification of COVID-19 Patients into Clinically Relevant Subsets by a Novel Machine Learning Pipeline Using Transcriptomic Features
Source: Int J Mol Sci. 2023 Mar 3;24(5):4905. doi: 10.3390/ijms24054905 (PMC10002748; doi:10.3390/ijms24054905)
Supplement: Supplementary file 1 [file ijms-24-04905-s001.zip › Table S1-Input Gene Modules.xlsx]

## Sheet: COVID ML Input Gene Modules
Gene Symbol	Entrez ID	Gene Module
C3	718	Alternative Complement
C5	727	Alternative Complement
C6	729	Alternative Complement
C7	730	Alternative Complement
C8A	731	Alternative Complement
C9	735	Alternative Complement
CFB	629	Alternative Complement
CFD	1675	Alternative Complement
CFH	3075	Alternative Complement
CFHR5	81494	Alternative Complement
CFP	5199	Alternative Complement
CR1	1378	Alternative Complement
GZMM	3004	Alternative Complement
MIR520B	574473	Alternative Complement
MIR520E	574461	Alternative Complement
VSIG4	11326	Alternative Complement
AASS	10157	Amino Acid Metabolism
AGXT	189	Amino Acid Metabolism
AGXT2	64902	Amino Acid Metabolism
ALDH4A1	8659	Amino Acid Metabolism
ALDH7A1	501	Amino Acid Metabolism
ARG1	383	Amino Acid Metabolism
GAD1	2571	Amino Acid Metabolism
GLUD1	2746	Amino Acid Metabolism
GOT1	2805	Amino Acid Metabolism
GPT2	84706	Amino Acid Metabolism
GRHPR	9380	Amino Acid Metabolism
IVD	3712	Amino Acid Metabolism
MCCC2	64087	Amino Acid Metabolism
OAT	4942	Amino Acid Metabolism
OTC	5009	Amino Acid Metabolism
OXCT1	5019	Amino Acid Metabolism
PC	5091	Amino Acid Metabolism
PSAT1	29968	Amino Acid Metabolism
SDS	10993	Amino Acid Metabolism
CD160	11126	Anergic_Activated T cells
CD244	51744	Anergic_Activated T cells
CTLA4	1493	Anergic_Activated T cells
HAVCR2	84868	Anergic_Activated T cells
ICOS	29851	Anergic_Activated T cells
KLRG1	10219	Anergic_Activated T cells
LAG3	3902	Anergic_Activated T cells
PDCD1	5133	Anergic_Activated T cells
IL1RN	3557	Anti inflammation
SOCS3	9021	Anti inflammation
TNFAIP3	7128	Anti inflammation
AIFM1	9131	Apoptosis
APAF1	317	Apoptosis
BAD	572	Apoptosis
BAK1	578	Apoptosis
BAX	581	Apoptosis
BCL2L11	10018	Apoptosis
BID	637	Apoptosis
CASP10	843	Apoptosis
CASP2	835	Apoptosis
CASP3	836	Apoptosis
CASP6	839	Apoptosis
CASP7	840	Apoptosis
CASP8	841	Apoptosis
CASP9	842	Apoptosis
DIABLO	56616	Apoptosis
ENDOG	2021	Apoptosis
FAS	355	Apoptosis
FASLG	356	Apoptosis
HTRA2	27429	Apoptosis
TNFRSF1A	7132	Apoptosis
TP53	7157	Apoptosis
BUB1B	701	CD40 Activated B Cell
CCL22	6367	CD40 Activated B Cell
CD58	965	CD40 Activated B Cell
DBI	1622	CD40 Activated B Cell
DUSP4	1846	CD40 Activated B Cell
FABP5	2171	CD40 Activated B Cell
FDPS	2224	CD40 Activated B Cell
FEN1	2237	CD40 Activated B Cell
GAPDH	2597	CD40 Activated B Cell
GARS	2617	CD40 Activated B Cell
GRHPR	9380	CD40 Activated B Cell
H2AFX	3014	CD40 Activated B Cell
H2AFZ	3015	CD40 Activated B Cell
HMGB2	3148	CD40 Activated B Cell
HMMR	3161	CD40 Activated B Cell
HPRT1	3251	CD40 Activated B Cell
IMPDH2	3615	CD40 Activated B Cell
LDHA	3939	CD40 Activated B Cell
LDHB	3945	CD40 Activated B Cell
LMNB1	4001	CD40 Activated B Cell
LPXN	9404	CD40 Activated B Cell
MCM2	4171	CD40 Activated B Cell
MCM3	4172	CD40 Activated B Cell
MCM6	4175	CD40 Activated B Cell
MSH6	2956	CD40 Activated B Cell
MTHFD2	10797	CD40 Activated B Cell
MYBL2	4605	CD40 Activated B Cell
NDC80	10403	CD40 Activated B Cell
NME1	4830	CD40 Activated B Cell
PAICS	10606	CD40 Activated B Cell
PCNA	5111	CD40 Activated B Cell
PKM	5315	CD40 Activated B Cell
PRDX3	10935	CD40 Activated B Cell
RFTN1	23180	CD40 Activated B Cell
RGS10	6001	CD40 Activated B Cell
SLAMF1	6504	CD40 Activated B Cell
TK1	7083	CD40 Activated B Cell
TOP2A	7153	CD40 Activated B Cell
TPX2	22974	CD40 Activated B Cell
TRAF1	7185	CD40 Activated B Cell
TUBA1B	10376	CD40 Activated B Cell
TXN	7295	CD40 Activated B Cell
TYMS	7298	CD40 Activated B Cell
UBE2S	27338	CD40 Activated B Cell
VDAC1	7416	CD40 Activated B Cell
WEE1	7465	CD40 Activated B Cell
WSB2	55884	CD40 Activated B Cell
ZWINT	11130	CD40 Activated B Cell
ASPM	259266	Cell Cycle
AURKA	6790	Cell Cycle
AURKB	9212	Cell Cycle
BRCA1	672	Cell Cycle
CCNB1	891	Cell Cycle
CCNB2	9133	Cell Cycle
CCNE1	898	Cell Cycle
CDC20	991	Cell Cycle
CENPM	79019	Cell Cycle
CEP55	55165	Cell Cycle
E2F3	1871	Cell Cycle
GINS2	51659	Cell Cycle
MCM10	55388	Cell Cycle
MCM2	4171	Cell Cycle
MKI67	4288	Cell Cycle
NCAPG	64151	Cell Cycle
NDC80	10403	Cell Cycle
PTTG1	9232	Cell Cycle
TYMS	7298	Cell Cycle
C1QA	712	Classical Complement
C1QC	714	Classical Complement
C1R	715	Classical Complement
C1S	716	Classical Complement
C2	717	Classical Complement
C3	718	Classical Complement
C4A	720	Classical Complement
C4B	721	Classical Complement
C4B_2	100293534	Classical Complement
C5	727	Classical Complement
C6	729	Classical Complement
C7	730	Classical Complement
C8A	731	Classical Complement
C9	735	Classical Complement
CIQB	713	Classical Complement
CD69	969	Cytotoxic_Activated T Cell
EOMES	8320	Cytotoxic_Activated T Cell
GZMB	3002	Cytotoxic_Activated T Cell
GZMH	2999	Cytotoxic_Activated T Cell
IFNG	3458	Cytotoxic_Activated T Cell
IL2RB	3560	Cytotoxic_Activated T Cell
PRF1	5551	Cytotoxic_Activated T Cell
SGK1	6446	Cytotoxic_Activated T Cell
TAGAP	117289	Cytotoxic_Activated T Cell
TBX21	30009	Cytotoxic_Activated T Cell
TFRC	7037	Cytotoxic_Activated T Cell
ZNF683	257101	Cytotoxic_Activated T Cell
CLEC10A	10462	Dendritic Cell
CLEC12A	160364	Dendritic Cell
CLEC9A	283420	Dendritic Cell
CSF1R	1436	Dendritic Cell
IGIP	492311	Dendritic Cell
LILRA4	23547	Dendritic Cell
LY75	4065	Dendritic Cell
XCR1	2829	Dendritic Cell
EPO	2056	Erythrocytes
GFI1B	8328	Erythrocytes
GYPA	2993	Erythrocytes
GYPB	2994	Erythrocytes
GYPE	2996	Erythrocytes
ICAM4	3386	Erythrocytes
NFE2	4778	Erythrocytes
SLC4A1	6521	Erythrocytes
TRIM10	10107	Erythrocytes
TSPO2	222642	Erythrocytes
ZNF367	195828	Erythrocytes
HAAO	23498	Fatty Acid Alpha Oxidation
HACL1	26061	Fatty Acid Alpha Oxidation
PEX13	5194	Fatty Acid Alpha Oxidation
PHYH	5264	Fatty Acid Alpha Oxidation
SLC27A2	11001	Fatty Acid Alpha Oxidation
ABCD1	215	Fatty Acid Beta Oxidation
ABCD2	225	Fatty Acid Beta Oxidation
ABCD3	5825	Fatty Acid Beta Oxidation
ACAA2	10449	Fatty Acid Beta Oxidation
ACACB	32	Fatty Acid Beta Oxidation
ACAD11	84129	Fatty Acid Beta Oxidation
ACADL	33	Fatty Acid Beta Oxidation
ACADM	34	Fatty Acid Beta Oxidation
ACADS	35	Fatty Acid Beta Oxidation
ACADVL	37	Fatty Acid Beta Oxidation
ACAT1	38	Fatty Acid Beta Oxidation
ACAT2	39	Fatty Acid Beta Oxidation
ACOX1	51	Fatty Acid Beta Oxidation
ACOX2	8309	Fatty Acid Beta Oxidation
ACOX3	8310	Fatty Acid Beta Oxidation
ACOXL	55289	Fatty Acid Beta Oxidation
ACSBG2	81616	Fatty Acid Beta Oxidation
ACSL5	51703	Fatty Acid Beta Oxidation
ADIPOQ	9370	Fatty Acid Beta Oxidation
AKT2	208	Fatty Acid Beta Oxidation
AUH	549	Fatty Acid Beta Oxidation
BDH2	56898	Fatty Acid Beta Oxidation
CPT1A	1374	Fatty Acid Beta Oxidation
CPT2	1376	Fatty Acid Beta Oxidation
CROT	54677	Fatty Acid Beta Oxidation
DECR1	1666	Fatty Acid Beta Oxidation
ECHDC1	55862	Fatty Acid Beta Oxidation
ECHDC2	55268	Fatty Acid Beta Oxidation
ECHS1	1892	Fatty Acid Beta Oxidation
ECI1	1632	Fatty Acid Beta Oxidation
ECI2	10455	Fatty Acid Beta Oxidation
EHHADH	1962	Fatty Acid Beta Oxidation
ETFA	2108	Fatty Acid Beta Oxidation
ETFB	2109	Fatty Acid Beta Oxidation
ETFDH	2110	Fatty Acid Beta Oxidation
FABP1	2168	Fatty Acid Beta Oxidation
GCDH	2639	Fatty Acid Beta Oxidation
HADH	3033	Fatty Acid Beta Oxidation
HADHA	3030	Fatty Acid Beta Oxidation
HADHB	3032	Fatty Acid Beta Oxidation
HIBCH	26275	Fatty Acid Beta Oxidation
HSD17B4	3295	Fatty Acid Beta Oxidation
IRS1	3667	Fatty Acid Beta Oxidation
IRS2	8660	Fatty Acid Beta Oxidation
IVD	3712	Fatty Acid Beta Oxidation
LEP	3952	Fatty Acid Beta Oxidation
PEX2	5828	Fatty Acid Beta Oxidation
PEX5	5830	Fatty Acid Beta Oxidation
PEX7	5191	Fatty Acid Beta Oxidation
SESN2	83667	Fatty Acid Beta Oxidation
SLC25A17	10478	Fatty Acid Beta Oxidation
SLC27A2	11001	Fatty Acid Beta Oxidation
TWIST1	7291	Fatty Acid Beta Oxidation
G6PC2	57818	Glycolysis
HKDC1	80201	Glycolysis
LDHAL6A	160287	Glycolysis
LDHAL6B	92483	Glycolysis
PFKFB2	5208	Glycolysis
PFKFB3	5209	Glycolysis
PFKFB4	5210	Glycolysis
PKM	5315	Glycolysis
SLC2A1	6513	Glycolysis
SLC2A3	6515	Glycolysis
SLC2A4	6517	Glycolysis
SLC2A5	6518	Glycolysis
CD177	57126	Granulocyte
CLC	1178	Granulocyte
CTSS	1520	Granulocyte
CXCR2	3579	Granulocyte
DEFA1	1667	Granulocyte
FUT7	2529	Granulocyte
LTB4R	1241	Granulocyte
MMP25	64386	Granulocyte
OSM	5008	Granulocyte
RETN	56729	Granulocyte
EIF2AK2	5610	IFN
GBP1	2633	IFN
GBP2	2634	IFN
GBP4	115361	IFN
HERC5	51191	IFN
HERC6	55008	IFN
IFI27	3429	IFN
IFI30	10437	IFN
IFI35	3430	IFN
IFI44	10561	IFN
IFI44L	10964	IFN
IFI6	2537	IFN
IFIT1	3434	IFN
IFIT2	3433	IFN
IFIT3	3437	IFN
IFIT5	24138	IFN
IFITM1	8519	IFN
IFITM2	10581	IFN
IFITM3	10410	IFN
ISG15	9636	IFN
ISG20	3669	IFN
MX1	4599	IFN
MX2	4600	IFN
OAS1	4938	IFN
OAS2	4939	IFN
OAS3	4940	IFN
OASL	8638	IFN
RSAD2	91543	IFN
SAMD9	54809	IFN
SAMD9L	219285	IFN
SP100	6672	IFN
SP110	3431	IFN
ACSL1	2180	IFNA2 Signature
ADAR	103	IFNA2 Signature
AGT	183	IFNA2 Signature
AIM2	9447	IFNA2 Signature
AKAP2	11217	IFNA2 Signature
APOBEC3B	9582	IFNA2 Signature
APOBEC3G	60489	IFNA2 Signature
APOL3	80833	IFNA2 Signature
ATF3	467	IFNA2 Signature
ATF5	22809	IFNA2 Signature
BAG1	573	IFNA2 Signature
BARD1	580	IFNA2 Signature
BCL7B	9275	IFNA2 Signature
BLVRA	644	IFNA2 Signature
BRCA1	672	IFNA2 Signature
BRCA2	675	IFNA2 Signature
BST2	684	IFNA2 Signature
BUB1	699	IFNA2 Signature
C2	717	IFNA2 Signature
CACNA1A	773	IFNA2 Signature
CAD	790	IFNA2 Signature
CAMK2A	815	IFNA2 Signature
CASP1	834	IFNA2 Signature
CASP10	843	IFNA2 Signature
CASP5	838	IFNA2 Signature
CBR1	873	IFNA2 Signature
CBWD1	55871	IFNA2 Signature
CCL13	6357	IFNA2 Signature
CCL7	6354	IFNA2 Signature
CCL8	6355	IFNA2 Signature
CCNA1	8900	IFNA2 Signature
CCND2	894	IFNA2 Signature
CD2AP	23607	IFNA2 Signature
CD38	952	IFNA2 Signature
CD4	920	IFNA2 Signature
CD69	969	IFNA2 Signature
CDC42EP1	11135	IFNA2 Signature
CDK4	1019	IFNA2 Signature
CDKN1A	1026	IFNA2 Signature
CFB	629	IFNA2 Signature
CH25H	9023	IFNA2 Signature
CHKA	1119	IFNA2 Signature
CNTN6	27255	IFNA2 Signature
COL3A1	1281	IFNA2 Signature
CTSL	1514	IFNA2 Signature
CXCL10	3627	IFNA2 Signature
CXCL11	6373	IFNA2 Signature
CXCL9	4283	IFNA2 Signature
CXCR2	3579	IFNA2 Signature
CYP2J2	1573	IFNA2 Signature
DAB2	1601	IFNA2 Signature
DEFB1	1672	IFNA2 Signature
DLL1	28514	IFNA2 Signature
DSC2	1824	IFNA2 Signature
DUSP5	1847	IFNA2 Signature
DUSP7	1849	IFNA2 Signature
DYNLT1	6993	IFNA2 Signature
DYSF	8291	IFNA2 Signature
ECE1	1889	IFNA2 Signature
EDN1	1906	IFNA2 Signature
EIF2AK2	5610	IFNA2 Signature
EIF2B1	1967	IFNA2 Signature
EIF4ENIF1	56478	IFNA2 Signature
ENPP2	5168	IFNA2 Signature
EPB41	2035	IFNA2 Signature
ETV4	2118	IFNA2 Signature
F8	2157	IFNA2 Signature
FAF1	11124	IFNA2 Signature
FAS	355	IFNA2 Signature
FGF1	2246	IFNA2 Signature
FLNA	2316	IFNA2 Signature
FOXO1	2308	IFNA2 Signature
FTL	2512	IFNA2 Signature
FUT4	2526	IFNA2 Signature
GADD45B	4616	IFNA2 Signature
GBAP1	2630	IFNA2 Signature
GBP1	2633	IFNA2 Signature
GBP2	2634	IFNA2 Signature
GCH1	2643	IFNA2 Signature
GCNT1	2650	IFNA2 Signature
GLB1	2720	IFNA2 Signature
GLS	2744	IFNA2 Signature
GMPR	2766	IFNA2 Signature
GPR161	23432	IFNA2 Signature
GUK1	2987	IFNA2 Signature
HBG2	3048	IFNA2 Signature
HCAR3	8843	IFNA2 Signature
HIST2H2AA3	8337	IFNA2 Signature
HLA-DOA	3111	IFNA2 Signature
HLA-DRB5	3127	IFNA2 Signature
HS6ST1	9394	IFNA2 Signature
HSP90AA1	3320	IFNA2 Signature
IDO1	3620	IFNA2 Signature
IFI16	3428	IFNA2 Signature
IFI27	3429	IFNA2 Signature
IFI35	3430	IFNA2 Signature
IFI44	10561	IFNA2 Signature
IFI44L	10964	IFNA2 Signature
IFI6	2537	IFNA2 Signature
IFIT1	3434	IFNA2 Signature
IFIT5	24138	IFNA2 Signature
IFITM1	8519	IFNA2 Signature
IFITM2	10581	IFNA2 Signature
IFITM3	10410	IFNA2 Signature
IFNG	3458	IFNA2 Signature
IFRD1	3475	IFNA2 Signature
IGL	3535	IFNA2 Signature
IKBKG	8517	IFNA2 Signature
IL15	3600	IFNA2 Signature
IL15RA	3601	IFNA2 Signature
IL1RN	3557	IFNA2 Signature
IL6	3569	IFNA2 Signature
INPPL1	3636	IFNA2 Signature
IRF2	3660	IFNA2 Signature
IRF7	3665	IFNA2 Signature
ISG15	9636	IFNA2 Signature
ISG20	3669	IFNA2 Signature
ITIH2	3698	IFNA2 Signature
JAK2	3717	IFNA2 Signature
JUP	3728	IFNA2 Signature
KCNA3	3738	IFNA2 Signature
KDELR2	11014	IFNA2 Signature
KIF20B	9585	IFNA2 Signature
KLF6	1316	IFNA2 Signature
KPNB1	3837	IFNA2 Signature
KRT8	3856	IFNA2 Signature
LAG3	3902	IFNA2 Signature
LAMP3	27074	IFNA2 Signature
LAP3	51056	IFNA2 Signature
LEPR	3953	IFNA2 Signature
LGALS2	3957	IFNA2 Signature
LGALS3BP	3959	IFNA2 Signature
LGALS9	3965	IFNA2 Signature
LGMN	5641	IFNA2 Signature
LMNB1	4001	IFNA2 Signature
LMO2	4005	IFNA2 Signature
LY6E	4061	IFNA2 Signature
MAP2K5	5607	IFNA2 Signature
MCL1	4170	IFNA2 Signature
MED1	5469	IFNA2 Signature
MGLL	11343	IFNA2 Signature
MMP16	4325	IFNA2 Signature
MNDA	4332	IFNA2 Signature
MRPS15	64960	IFNA2 Signature
MSR1	4481	IFNA2 Signature
MX1	4599	IFNA2 Signature
MX2	4600	IFNA2 Signature
MYD88	4615	IFNA2 Signature
NAMPT	10135	IFNA2 Signature
NFE2L3	9603	IFNA2 Signature
NKTR	4820	IFNA2 Signature
NMI	9111	IFNA2 Signature
NR3C1	2908	IFNA2 Signature
NUB1	51667	IFNA2 Signature
NUPR1	26471	IFNA2 Signature
OAS1	4938	IFNA2 Signature
OAS2	4939	IFNA2 Signature
OAS3	4940	IFNA2 Signature
OSBPL1A	114876	IFNA2 Signature
PATJ	10207	IFNA2 Signature
PDGFB	5155	IFNA2 Signature
PDGFRL	5157	IFNA2 Signature
PGGT1B	5229	IFNA2 Signature
PKD2	5311	IFNA2 Signature
PLSCR1	5359	IFNA2 Signature
PMAIP1	5366	IFNA2 Signature
PML	5371	IFNA2 Signature
PRKRA	8575	IFNA2 Signature
PSMB9	5698	IFNA2 Signature
PTCH1	5727	IFNA2 Signature
RBCK1	10616	IFNA2 Signature
RET	5979	IFNA2 Signature
RGS1	5996	IFNA2 Signature
RGS6	9628	IFNA2 Signature
RPS9	6203	IFNA2 Signature
RTP4	64108	IFNA2 Signature
SAT1	6303	IFNA2 Signature
SCARB2	950	IFNA2 Signature
SERPING1	710	IFNA2 Signature
SIT1	27240	IFNA2 Signature
SLAMF1	6504	IFNA2 Signature
SOCS1	8651	IFNA2 Signature
SP100	6672	IFNA2 Signature
SP110	3431	IFNA2 Signature
SP140	11262	IFNA2 Signature
SPIB	6689	IFNA2 Signature
ST3GAL5	8869	IFNA2 Signature
STAP1	26228	IFNA2 Signature
STAT1	6772	IFNA2 Signature
STAT2	6773	IFNA2 Signature
STX11	8676	IFNA2 Signature
SUPT3H	8464	IFNA2 Signature
SYN2	6854	IFNA2 Signature
TAF5L	27097	IFNA2 Signature
TAP1	6890	IFNA2 Signature
TAP2	6891	IFNA2 Signature
TARBP1	6894	IFNA2 Signature
TCN2	6948	IFNA2 Signature
TFDP2	7029	IFNA2 Signature
TGM1	7051	IFNA2 Signature
TLR3	7098	IFNA2 Signature
TLR7	51284	IFNA2 Signature
TNFRSF11A	8792	IFNA2 Signature
TNFSF10	8743	IFNA2 Signature
TNFSF6	356	IFNA2 Signature
TNK2	10188	IFNA2 Signature
TOR1B	27348	IFNA2 Signature
TRA2B	6434	IFNA2 Signature
TRD	6964	IFNA2 Signature
TRIM21	6737	IFNA2 Signature
TRIM22	10346	IFNA2 Signature
TRIM26	7726	IFNA2 Signature
TRIM34	53840	IFNA2 Signature
TRIM38	10475	IFNA2 Signature
UBA7	7318	IFNA2 Signature
UBE2L6	9246	IFNA2 Signature
UBE2S	27338	IFNA2 Signature
UBE3A	7337	IFNA2 Signature
UNC93B1	81622	IFNA2 Signature
USP18	11274	IFNA2 Signature
VAMP5	10791	IFNA2 Signature
WARS	7453	IFNA2 Signature
WT1	7490	IFNA2 Signature
XAF1	54739	IFNA2 Signature
ACLY	47	IFNB1 Signature
ACSL1	2180	IFNB1 Signature
ADAM19	8728	IFNB1 Signature
ADAP2	55803	IFNB1 Signature
ADAR	103	IFNB1 Signature
ADGRE2	30817	IFNB1 Signature
ADM	133	IFNB1 Signature
AFF3	3899	IFNB1 Signature
AGT	183	IFNB1 Signature
AIM2	9447	IFNB1 Signature
AKAP10	11216	IFNB1 Signature
AKAP2	11217	IFNB1 Signature
ALOX12	239	IFNB1 Signature
ALOX5	240	IFNB1 Signature
ANXA4	307	IFNB1 Signature
APOBEC3B	9582	IFNB1 Signature
APOBEC3G	60489	IFNB1 Signature
APOL3	80833	IFNB1 Signature
ATF3	467	IFNB1 Signature
ATF5	22809	IFNB1 Signature
ATM	472	IFNB1 Signature
ATP13A1	57130	IFNB1 Signature
B4GAT1	11041	IFNB1 Signature
BAG1	573	IFNB1 Signature
BAK1	578	IFNB1 Signature
BARD1	580	IFNB1 Signature
BCL11A	53335	IFNB1 Signature
BCL7B	9275	IFNB1 Signature
BGN	633	IFNB1 Signature
BLNK	29760	IFNB1 Signature
BLVRA	644	IFNB1 Signature
BLZF1	8548	IFNB1 Signature
BRCA1	672	IFNB1 Signature
BRCA2	675	IFNB1 Signature
BST2	684	IFNB1 Signature
BUB1	699	IFNB1 Signature
C3AR1	719	IFNB1 Signature
CACNA1A	773	IFNB1 Signature
CAD	790	IFNB1 Signature
CALD1	800	IFNB1 Signature
CAMK2A	815	IFNB1 Signature
CAPN2	824	IFNB1 Signature
CASP1	834	IFNB1 Signature
CASP10	843	IFNB1 Signature
CASP5	838	IFNB1 Signature
CBR1	873	IFNB1 Signature
CBWD1	55871	IFNB1 Signature
CCL13	6357	IFNB1 Signature
CCL3L1	6349	IFNB1 Signature
CCL4	6351	IFNB1 Signature
CCL7	6354	IFNB1 Signature
CCL8	6355	IFNB1 Signature
CCNA1	8900	IFNB1 Signature
CCND2	894	IFNB1 Signature
CCR1	1230	IFNB1 Signature
CCR5	1234	IFNB1 Signature
CCRL2	9034	IFNB1 Signature
CD163	9332	IFNB1 Signature
CD164	8763	IFNB1 Signature
CD2AP	23607	IFNB1 Signature
CD38	952	IFNB1 Signature
CD4	920	IFNB1 Signature
CD59	966	IFNB1 Signature
CD69	969	IFNB1 Signature
CD72	971	IFNB1 Signature
CD86	942	IFNB1 Signature
CDK17	5128	IFNB1 Signature
CDKN1A	1026	IFNB1 Signature
CENPA	1058	IFNB1 Signature
CENPE	1062	IFNB1 Signature
CFB	629	IFNB1 Signature
CFLAR	8837	IFNB1 Signature
CH25H	9023	IFNB1 Signature
CHI3L2	1117	IFNB1 Signature
CHKA	1119	IFNB1 Signature
CISH	1154	IFNB1 Signature
CKB	1152	IFNB1 Signature
CMAHP	8418	IFNB1 Signature
CNTN6	27255	IFNB1 Signature
CNTRL	11064	IFNB1 Signature
COL3A1	1281	IFNB1 Signature
COX17	10063	IFNB1 Signature
CSF2RB	1439	IFNB1 Signature
CTSL	1514	IFNB1 Signature
CXCL10	3627	IFNB1 Signature
CXCL11	6373	IFNB1 Signature
CXCL2	2920	IFNB1 Signature
CXCL9	4283	IFNB1 Signature
CXCR2	3579	IFNB1 Signature
CYBB	1536	IFNB1 Signature
CYP19A1	1588	IFNB1 Signature
CYP2J2	1573	IFNB1 Signature
DAB2	1601	IFNB1 Signature
DEFA1	1667	IFNB1 Signature
DEFB1	1672	IFNB1 Signature
DHFR	1719	IFNB1 Signature
DLL1	28514	IFNB1 Signature
DMXL1	1657	IFNB1 Signature
DNMT1	1786	IFNB1 Signature
DRAP1	10589	IFNB1 Signature
DSC2	1824	IFNB1 Signature
DUSP5	1847	IFNB1 Signature
DUSP7	1849	IFNB1 Signature
DYNLT1	6993	IFNB1 Signature
DYSF	8291	IFNB1 Signature
E2F1	1869	IFNB1 Signature
ECE1	1889	IFNB1 Signature
EDN1	1906	IFNB1 Signature
EGR1	1958	IFNB1 Signature
EIF2AK2	5610	IFNB1 Signature
EIF2B1	1967	IFNB1 Signature
EIF4ENIF1	56478	IFNB1 Signature
ELF1	1997	IFNB1 Signature
ELF4	2000	IFNB1 Signature
ENPP2	5168	IFNB1 Signature
EPB41	2035	IFNB1 Signature
ETV4	2118	IFNB1 Signature
ETV6	2120	IFNB1 Signature
F8	2157	IFNB1 Signature
FAF1	11124	IFNB1 Signature
FAS	355	IFNB1 Signature
FBXW2	26190	IFNB1 Signature
FCGR1A	2209	IFNB1 Signature
FCMR	9214	IFNB1 Signature
FGF1	2246	IFNB1 Signature
FLNA	2316	IFNB1 Signature
FMR1	2332	IFNB1 Signature
FOXO1	2308	IFNB1 Signature
FPR2	2358	IFNB1 Signature
FTL	2512	IFNB1 Signature
FUT4	2526	IFNB1 Signature
GADD45B	4616	IFNB1 Signature
GBAP1	2630	IFNB1 Signature
GBP1	2633	IFNB1 Signature
GBP2	2634	IFNB1 Signature
GCH1	2643	IFNB1 Signature
GCNT1	2650	IFNB1 Signature
GLS	2744	IFNB1 Signature
GMPR	2766	IFNB1 Signature
GPI	2821	IFNB1 Signature
GPR161	23432	IFNB1 Signature
GUK1	2987	IFNB1 Signature
HBG2	3048	IFNB1 Signature
HCAR3	8843	IFNB1 Signature
HHEX	3087	IFNB1 Signature
HIST2H2AA3	8337	IFNB1 Signature
HK2	3099	IFNB1 Signature
HLA-DOA	3111	IFNB1 Signature
HS6ST1	9394	IFNB1 Signature
HSP90AA1	3320	IFNB1 Signature
HSPA1A	3303	IFNB1 Signature
HSPA1L	3305	IFNB1 Signature
IDO1	3620	IFNB1 Signature
IFI16	3428	IFNB1 Signature
IFI27	3429	IFNB1 Signature
IFI35	3430	IFNB1 Signature
IFI44	10561	IFNB1 Signature
IFI6	2537	IFNB1 Signature
IFIT1	3434	IFNB1 Signature
IFIT5	24138	IFNB1 Signature
IFITM1	8519	IFNB1 Signature
IFITM2	10581	IFNB1 Signature
IFITM3	10410	IFNB1 Signature
IFNG	3458	IFNB1 Signature
IFRD1	3475	IFNB1 Signature
IGL	3535	IFNB1 Signature
IKBKE	9641	IFNB1 Signature
IKBKG	8517	IFNB1 Signature
IL15	3600	IFNB1 Signature
IL15RA	3601	IFNB1 Signature
IL18BP	10068	IFNB1 Signature
IL18R1	8809	IFNB1 Signature
IL1RN	3557	IFNB1 Signature
IL6	3569	IFNB1 Signature
IL7	3574	IFNB1 Signature
INPP5D	3635	IFNB1 Signature
INPPL1	3636	IFNB1 Signature
IRF1	3659	IFNB1 Signature
IRF2	3660	IFNB1 Signature
IRF4	3662	IFNB1 Signature
IRF7	3665	IFNB1 Signature
IRF9	10379	IFNB1 Signature
ISG15	9636	IFNB1 Signature
ISG20	3669	IFNB1 Signature
ITGAL	3683	IFNB1 Signature
ITGAX	3687	IFNB1 Signature
JAK2	3717	IFNB1 Signature
JCHAIN	3512	IFNB1 Signature
JUP	3728	IFNB1 Signature
KCNA3	3738	IFNB1 Signature
KCNMB1	3779	IFNB1 Signature
KDELR2	11014	IFNB1 Signature
KIF20B	9585	IFNB1 Signature
KLF2	10365	IFNB1 Signature
KLF6	1316	IFNB1 Signature
KLRB1	3820	IFNB1 Signature
KPNB1	3837	IFNB1 Signature
KRT8	3856	IFNB1 Signature
LAG3	3902	IFNB1 Signature
LAMP3	27074	IFNB1 Signature
LANCL1	10314	IFNB1 Signature
LAP3	51056	IFNB1 Signature
LBR	3930	IFNB1 Signature
LEPR	3953	IFNB1 Signature
LGALS2	3957	IFNB1 Signature
LGALS3BP	3959	IFNB1 Signature
LGALS9	3965	IFNB1 Signature
LGMN	5641	IFNB1 Signature
LILRA1	11024	IFNB1 Signature
LINC00597	81698	IFNB1 Signature
LMNB1	4001	IFNB1 Signature
LMO2	4005	IFNB1 Signature
LTA	4049	IFNB1 Signature
LTB4R	1241	IFNB1 Signature
LY6E	4061	IFNB1 Signature
LYN	4067	IFNB1 Signature
MAP2K5	5607	IFNB1 Signature
MAP3K8	1326	IFNB1 Signature
MARCKS	4082	IFNB1 Signature
MBNL	4154	IFNB1 Signature
MCL1	4170	IFNB1 Signature
MED1	5469	IFNB1 Signature
MEF2A	4205	IFNB1 Signature
MFHAS1	9258	IFNB1 Signature
MGLL	11343	IFNB1 Signature
MNDA	4332	IFNB1 Signature
MRPS15	64960	IFNB1 Signature
MS4A7	58475	IFNB1 Signature
MSR1	4481	IFNB1 Signature
MX1	4599	IFNB1 Signature
MX2	4600	IFNB1 Signature
MYD88	4615	IFNB1 Signature
NAMPT	10135	IFNB1 Signature
NAPSA	9476	IFNB1 Signature
NBN	4683	IFNB1 Signature
NCF1	653361	IFNB1 Signature
NCOA2	10499	IFNB1 Signature
NEBL	10529	IFNB1 Signature
NEK4	6787	IFNB1 Signature
NFE2L3	9603	IFNB1 Signature
NKTR	4820	IFNB1 Signature
NMI	9111	IFNB1 Signature
NOTCH1	4851	IFNB1 Signature
NR3C1	2908	IFNB1 Signature
NR4A3	8013	IFNB1 Signature
NUB1	51667	IFNB1 Signature
NUPR1	26471	IFNB1 Signature
OAS1	4938	IFNB1 Signature
OAS2	4939	IFNB1 Signature
OAS3	4940	IFNB1 Signature
PATJ	10207	IFNB1 Signature
PAX5	5079	IFNB1 Signature
PAX8	7849	IFNB1 Signature
PDE4B	5142	IFNB1 Signature
PDGFB	5155	IFNB1 Signature
PDGFRL	5157	IFNB1 Signature
PFKFB3	5209	IFNB1 Signature
PFKP	5214	IFNB1 Signature
PIM2	11040	IFNB1 Signature
PKD2	5311	IFNB1 Signature
PLEK	5341	IFNB1 Signature
PLSCR1	5359	IFNB1 Signature
PMAIP1	5366	IFNB1 Signature
PML	5371	IFNB1 Signature
PMS2	5395	IFNB1 Signature
PPP2R2A	5520	IFNB1 Signature
PRKAG1	5571	IFNB1 Signature
PRKRA	8575	IFNB1 Signature
PRKX	5613	IFNB1 Signature
PSMB8	5696	IFNB1 Signature
PSMB9	5698	IFNB1 Signature
PTCH1	5727	IFNB1 Signature
PTGER2	5732	IFNB1 Signature
RALB	5899	IFNB1 Signature
RASGRP1	10125	IFNB1 Signature
RBBP6	5930	IFNB1 Signature
RBCK1	10616	IFNB1 Signature
RERE	473	IFNB1 Signature
RGS1	5996	IFNB1 Signature
RGS6	9628	IFNB1 Signature
RIN1	9610	IFNB1 Signature
RIPK1	8737	IFNB1 Signature
RIPK3	11035	IFNB1 Signature
RIPOR2	9750	IFNB1 Signature
RNF114	55905	IFNB1 Signature
RPS6KA5	9252	IFNB1 Signature
RPS9	6203	IFNB1 Signature
RRBP1	6238	IFNB1 Signature
RTP4	64108	IFNB1 Signature
SAT1	6303	IFNB1 Signature
SCARB2	950	IFNB1 Signature
SDS	10993	IFNB1 Signature
SELL	6402	IFNB1 Signature
SERPIND1	3053	IFNB1 Signature
SERPING1	710	IFNB1 Signature
SFTPB	6439	IFNB1 Signature
SIDT2	51092	IFNB1 Signature
SIT1	27240	IFNB1 Signature
SLAMF1	6504	IFNB1 Signature
SMO	6608	IFNB1 Signature
SNX2	6643	IFNB1 Signature
SOCS1	8651	IFNB1 Signature
SOS1	6654	IFNB1 Signature
SP100	6672	IFNB1 Signature
SP110	3431	IFNB1 Signature
SP140	11262	IFNB1 Signature
SPIB	6689	IFNB1 Signature
SPTA1	6708	IFNB1 Signature
SPTLC2	9517	IFNB1 Signature
SRRM2	23524	IFNB1 Signature
SSB	6741	IFNB1 Signature
ST3GAL5	8869	IFNB1 Signature
STAP1	26228	IFNB1 Signature
STAT1	6772	IFNB1 Signature
STAT2	6773	IFNB1 Signature
STOML2	30968	IFNB1 Signature
STX11	8676	IFNB1 Signature
SUPT3H	8464	IFNB1 Signature
TANK	10010	IFNB1 Signature
TAP1	6890	IFNB1 Signature
TAP2	6891	IFNB1 Signature
TAPBP	6892	IFNB1 Signature
TARBP1	6894	IFNB1 Signature
TBX21	30009	IFNB1 Signature
TCN2	6948	IFNB1 Signature
TFDP2	7029	IFNB1 Signature
TFF1	7031	IFNB1 Signature
TGM1	7051	IFNB1 Signature
THY1	7070	IFNB1 Signature
TLR1	7096	IFNB1 Signature
TLR3	7098	IFNB1 Signature
TLR7	51284	IFNB1 Signature
TNFAIP2	7127	IFNB1 Signature
TNFRSF11A	8792	IFNB1 Signature
TNFSF10	8743	IFNB1 Signature
TNFSF6	356	IFNB1 Signature
TNK2	10188	IFNB1 Signature
TOR1B	27348	IFNB1 Signature
TRA2B	6434	IFNB1 Signature
TRD	6964	IFNB1 Signature
TRG	6965	IFNB1 Signature
TRIM21	6737	IFNB1 Signature
TRIM22	10346	IFNB1 Signature
TRIM26	7726	IFNB1 Signature
TRIM34	53840	IFNB1 Signature
TRIM38	10475	IFNB1 Signature
TSPAN15	23555	IFNB1 Signature
TXK	7294	IFNB1 Signature
UBA7	7318	IFNB1 Signature
UBE2L6	9246	IFNB1 Signature
UBE2S	27338	IFNB1 Signature
UBE3A	7337	IFNB1 Signature
UBQLN2	29978	IFNB1 Signature
UNC93B1	81622	IFNB1 Signature
USP15	9958	IFNB1 Signature
USP18	11274	IFNB1 Signature
USP25	29761	IFNB1 Signature
USPL1	10208	IFNB1 Signature
UVRAG	7405	IFNB1 Signature
VAMP5	10791	IFNB1 Signature
WARS	7453	IFNB1 Signature
WIPF1	7456	IFNB1 Signature
WT1	7490	IFNB1 Signature
XAF1	54739	IFNB1 Signature
ZNF107	51427	IFNB1 Signature
ACLY	47	IFNG Signature
ACSL1	2180	IFNG Signature
AFF2	2334	IFNG Signature
AIM2	9447	IFNG Signature
AKAP10	11216	IFNG Signature
APOL3	80833	IFNG Signature
ATF3	467	IFNG Signature
ATM	472	IFNG Signature
C1QB	713	IFNG Signature
C4A	720	IFNG Signature
CALD1	800	IFNG Signature
CASP1	834	IFNG Signature
CASP10	843	IFNG Signature
CCL8	6355	IFNG Signature
CCND2	894	IFNG Signature
CCR5	1234	IFNG Signature
CD38	952	IFNG Signature
CDKN1A	1026	IFNG Signature
CFB	629	IFNG Signature
CKB	1152	IFNG Signature
CLEC10A	10462	IFNG Signature
CPT1B	1375	IFNG Signature
CSF2RB	1439	IFNG Signature
CTNND2	1501	IFNG Signature
CXCL10	3627	IFNG Signature
CXCL11	6373	IFNG Signature
CXCL9	4283	IFNG Signature
CYBB	1536	IFNG Signature
EDN1	1906	IFNG Signature
EPB41	2035	IFNG Signature
ETAA1	54465	IFNG Signature
ETV4	2118	IFNG Signature
F8	2157	IFNG Signature
FAS	355	IFNG Signature
FBLN1	2192	IFNG Signature
FBXL2	25827	IFNG Signature
FCGR1A	2209	IFNG Signature
FLII	2314	IFNG Signature
GADD45B	4616	IFNG Signature
GBP1	2633	IFNG Signature
GBP2	2634	IFNG Signature
GCH1	2643	IFNG Signature
GCNT1	2650	IFNG Signature
GLS	2744	IFNG Signature
GSTM5	2949	IFNG Signature
HBG2	3048	IFNG Signature
HHEX	3087	IFNG Signature
HP	3240	IFNG Signature
ICAM1	3383	IFNG Signature
IDO1	3620	IFNG Signature
IFI27	3429	IFNG Signature
IFI44	10561	IFNG Signature
IL15	3600	IFNG Signature
IL15RA	3601	IFNG Signature
IL18BP	10068	IFNG Signature
IL1A	3552	IFNG Signature
IL7	3574	IFNG Signature
IRF1	3659	IFNG Signature
IRF8	3394	IFNG Signature
JAK2	3717	IFNG Signature
JCHAIN	3512	IFNG Signature
KLF2	10365	IFNG Signature
LAP3	51056	IFNG Signature
LIMK2	3985	IFNG Signature
LMNB1	4001	IFNG Signature
MMP25	64386	IFNG Signature
MRPS15	64960	IFNG Signature
MSR1	4481	IFNG Signature
NET1	10276	IFNG Signature
NIN	51199	IFNG Signature
NKTR	4820	IFNG Signature
NLRP1	22861	IFNG Signature
NR3C1	2908	IFNG Signature
OAS1	4938	IFNG Signature
OAS3	4940	IFNG Signature
P2RY13	53829	IFNG Signature
PCDH9	5101	IFNG Signature
PLA2G4C	8605	IFNG Signature
PLEK	5341	IFNG Signature
POLR2B	5431	IFNG Signature
PSMB9	5698	IFNG Signature
PTCH1	5727	IFNG Signature
RALB	5899	IFNG Signature
RGS1	5996	IFNG Signature
SERPIND1	3053	IFNG Signature
SERPING1	710	IFNG Signature
SFTPB	6439	IFNG Signature
SLAMF1	6504	IFNG Signature
SLC1A5	6510	IFNG Signature
SOCS1	8651	IFNG Signature
SP100	6672	IFNG Signature
SPRY4	81848	IFNG Signature
SRRM2	23524	IFNG Signature
STAT1	6772	IFNG Signature
STAT2	6773	IFNG Signature
STX11	8676	IFNG Signature
TAP1	6890	IFNG Signature
TAP2	6891	IFNG Signature
TBX21	30009	IFNG Signature
TENM1	10178	IFNG Signature
TFF1	7031	IFNG Signature
TNFAIP2	7127	IFNG Signature
TNFSF10	8743	IFNG Signature
UBD	10537	IFNG Signature
UBE2C	11065	IFNG Signature
UBE2L6	9246	IFNG Signature
UBE3A	7337	IFNG Signature
VAMP5	10791	IFNG Signature
VSNL1	7447	IFNG Signature
WARS	7453	IFNG Signature
XRN1	54464	IFNG Signature
AC245128	NA	Inflammatory Neutrophil
ACSL1	2180	Inflammatory Neutrophil
ADAR	103	Inflammatory Neutrophil
ADD3	120	Inflammatory Neutrophil
ADM	133	Inflammatory Neutrophil
ALOX5AP	241	Inflammatory Neutrophil
ALPL	249	Inflammatory Neutrophil
ANXA1	301	Inflammatory Neutrophil
ANXA3	306	Inflammatory Neutrophil
APOBEC3A	200315	Inflammatory Neutrophil
APOL2	23780	Inflammatory Neutrophil
APOL6	80830	Inflammatory Neutrophil
B4GALT5	9334	Inflammatory Neutrophil
BAZ1A	11177	Inflammatory Neutrophil
BRI3	25798	Inflammatory Neutrophil
BST1	683	Inflammatory Neutrophil
C1orf162	128346	Inflammatory Neutrophil
C3AR1	719	Inflammatory Neutrophil
C4orf3	401152	Inflammatory Neutrophil
CAPZA1	829	Inflammatory Neutrophil
CARD16	114769	Inflammatory Neutrophil
CASP1	834	Inflammatory Neutrophil
CASP4	837	Inflammatory Neutrophil
CAST	831	Inflammatory Neutrophil
CCR1	1230	Inflammatory Neutrophil
CD177	57126	Inflammatory Neutrophil
CD37	951	Inflammatory Neutrophil
CD44	960	Inflammatory Neutrophil
CD53	963	Inflammatory Neutrophil
CD55	1604	Inflammatory Neutrophil
CD63	967	Inflammatory Neutrophil
CD82	3732	Inflammatory Neutrophil
CDKN2D	1032	Inflammatory Neutrophil
CEACAM1	634	Inflammatory Neutrophil
CFL1	1072	Inflammatory Neutrophil
CKAP4	10970	Inflammatory Neutrophil
CLEC4D	338339	Inflammatory Neutrophil
CLEC4E	26253	Inflammatory Neutrophil
CR1	1378	Inflammatory Neutrophil
CST7	8530	Inflammatory Neutrophil
CYSTM1	84418	Inflammatory Neutrophil
DDX58	23586	Inflammatory Neutrophil
DDX60	55601	Inflammatory Neutrophil
DDX60L	91351	Inflammatory Neutrophil
DYSF	8291	Inflammatory Neutrophil
EIF2AK2	5610	Inflammatory Neutrophil
EMB	133418	Inflammatory Neutrophil
EPSTI1	94240	Inflammatory Neutrophil
FCER1G	2207	Inflammatory Neutrophil
FCGR1A	2209	Inflammatory Neutrophil
FFAR2	2867	Inflammatory Neutrophil
FGR	2268	Inflammatory Neutrophil
FKBP1A	2280	Inflammatory Neutrophil
FKBP5	2289	Inflammatory Neutrophil
FLOT1	10211	Inflammatory Neutrophil
FYB1	2533	Inflammatory Neutrophil
GAPDH	2597	Inflammatory Neutrophil
GBP1	2633	Inflammatory Neutrophil
GBP2	2634	Inflammatory Neutrophil
GBP4	115361	Inflammatory Neutrophil
GBP5	115362	Inflammatory Neutrophil
GCA	25801	Inflammatory Neutrophil
GIMAP4	55303	Inflammatory Neutrophil
GLRX	2745	Inflammatory Neutrophil
GNG5	2787	Inflammatory Neutrophil
GRINA	2907	Inflammatory Neutrophil
GRN	2896	Inflammatory Neutrophil
GSTK1	373156	Inflammatory Neutrophil
GYG1	2992	Inflammatory Neutrophil
H2AC6	8334	Inflammatory Neutrophil
H2BC21	8349	Inflammatory Neutrophil
H2BC5	3017	Inflammatory Neutrophil
HERC5	51191	Inflammatory Neutrophil
HIF1A	3091	Inflammatory Neutrophil
HLA-F	3134	Inflammatory Neutrophil
HMGB2	3148	Inflammatory Neutrophil
IFI16	3428	Inflammatory Neutrophil
IFI44	10561	Inflammatory Neutrophil
IFI44L	10964	Inflammatory Neutrophil
IFI6	2537	Inflammatory Neutrophil
IFIH1	64135	Inflammatory Neutrophil
IFIT1	3434	Inflammatory Neutrophil
IFIT2	3433	Inflammatory Neutrophil
IFIT3	3437	Inflammatory Neutrophil
IFITM1	8519	Inflammatory Neutrophil
IFITM3	10410	Inflammatory Neutrophil
IL1RN	3557	Inflammatory Neutrophil
IL2RG	3561	Inflammatory Neutrophil
IRF1	3659	Inflammatory Neutrophil
IRF7	3665	Inflammatory Neutrophil
ISG15	9636	Inflammatory Neutrophil
ISG20	3669	Inflammatory Neutrophil
ITGAM	3684	Inflammatory Neutrophil
JUN	3725	Inflammatory Neutrophil
KCNJ15	3772	Inflammatory Neutrophil
KLF4	9314	Inflammatory Neutrophil
LAP3	51056	Inflammatory Neutrophil
LGALS9	3965	Inflammatory Neutrophil
LILRA5	353514	Inflammatory Neutrophil
LILRA6	79168	Inflammatory Neutrophil
LILRB3	11025	Inflammatory Neutrophil
LIMK2	3985	Inflammatory Neutrophil
LMNB1	4001	Inflammatory Neutrophil
LRG1	116844	Inflammatory Neutrophil
LY6E	4061	Inflammatory Neutrophil
LY96	23643	Inflammatory Neutrophil
MAPK14	1432	Inflammatory Neutrophil
MAX	4149	Inflammatory Neutrophil
MCEMP1	199675	Inflammatory Neutrophil
METTL9	51108	Inflammatory Neutrophil
MMP9	4318	Inflammatory Neutrophil
MOB1A	55233	Inflammatory Neutrophil
MSRB1	51734	Inflammatory Neutrophil
MT2A	4502	Inflammatory Neutrophil
MTPN	136319	Inflammatory Neutrophil
MX1	4599	Inflammatory Neutrophil
MX2	4600	Inflammatory Neutrophil
MYL12A	10627	Inflammatory Neutrophil
NBN	4683	Inflammatory Neutrophil
NFE2	4778	Inflammatory Neutrophil
NFIL3	4783	Inflammatory Neutrophil
NFKBIA	4792	Inflammatory Neutrophil
NMI	9111	Inflammatory Neutrophil
NT5C3A	51251	Inflammatory Neutrophil
NTNG2	84628	Inflammatory Neutrophil
NUB1	51667	Inflammatory Neutrophil
NUCB1	4924	Inflammatory Neutrophil
OAS1	4938	Inflammatory Neutrophil
OAS2	4939	Inflammatory Neutrophil
OAS3	4940	Inflammatory Neutrophil
OASL	8638	Inflammatory Neutrophil
PARP14	54625	Inflammatory Neutrophil
PARP9	83666	Inflammatory Neutrophil
PGD	5226	Inflammatory Neutrophil
PHF11	51131	Inflammatory Neutrophil
PIK3AP1	118788	Inflammatory Neutrophil
PIM1	5292	Inflammatory Neutrophil
PLAC8	51316	Inflammatory Neutrophil
PLBD1	79887	Inflammatory Neutrophil
PLEK	5341	Inflammatory Neutrophil
PLP2	5355	Inflammatory Neutrophil
PLSCR1	5359	Inflammatory Neutrophil
PML	5371	Inflammatory Neutrophil
PROK2	60675	Inflammatory Neutrophil
PRR13	54458	Inflammatory Neutrophil
PSMB9	5698	Inflammatory Neutrophil
PSTPIP2	9050	Inflammatory Neutrophil
PTEN	5728	Inflammatory Neutrophil
RAC2	5880	Inflammatory Neutrophil
RBCK1	10616	Inflammatory Neutrophil
RBMS1	5937	Inflammatory Neutrophil
RGS19	10287	Inflammatory Neutrophil
RHOG	391	Inflammatory Neutrophil
RNF10	9921	Inflammatory Neutrophil
RNF213	57674	Inflammatory Neutrophil
RPL28	6158	Inflammatory Neutrophil
RSAD2	91543	Inflammatory Neutrophil
S100A12	6283	Inflammatory Neutrophil
S100A6	6277	Inflammatory Neutrophil
SAMD9	54809	Inflammatory Neutrophil
SAMD9L	219285	Inflammatory Neutrophil
SAMHD1	25939	Inflammatory Neutrophil
SAMSN1	64092	Inflammatory Neutrophil
SAT1	6303	Inflammatory Neutrophil
SECTM1	6398	Inflammatory Neutrophil
SELL	6402	Inflammatory Neutrophil
SERPINA1	5265	Inflammatory Neutrophil
SERPINB1	1992	Inflammatory Neutrophil
SERPING1	710	Inflammatory Neutrophil
SH3GLB1	51100	Inflammatory Neutrophil
SHISA5	51246	Inflammatory Neutrophil
SLFN5	162394	Inflammatory Neutrophil
SNX3	8724	Inflammatory Neutrophil
SP100	6672	Inflammatory Neutrophil
SP110	3431	Inflammatory Neutrophil
SPI1	6688	Inflammatory Neutrophil
SPTLC2	9517	Inflammatory Neutrophil
STAT1	6772	Inflammatory Neutrophil
STAT2	6773	Inflammatory Neutrophil
STXBP2	6813	Inflammatory Neutrophil
TAP1	6890	Inflammatory Neutrophil
TMEM123	114908	Inflammatory Neutrophil
TMSB10	9168	Inflammatory Neutrophil
TNFAIP6	7130	Inflammatory Neutrophil
TNFSF10	8743	Inflammatory Neutrophil
TNFSF13B	10673	Inflammatory Neutrophil
TPM3	7170	Inflammatory Neutrophil
TRIM22	10346	Inflammatory Neutrophil
TRIM38	10475	Inflammatory Neutrophil
TXN	7295	Inflammatory Neutrophil
UBE2J1	51465	Inflammatory Neutrophil
UBE2L6	9246	Inflammatory Neutrophil
VIM	7431	Inflammatory Neutrophil
VNN2	8875	Inflammatory Neutrophil
WSB1	26118	Inflammatory Neutrophil
XAF1	54739	Inflammatory Neutrophil
XRN1	54464	Inflammatory Neutrophil
ZBP1	81030	Inflammatory Neutrophil
ZCCHC2	54877	Inflammatory Neutrophil
ZDHHC19	131540	Inflammatory Neutrophil
ZYX	7791	Inflammatory Neutrophil
AZU1	566	LDG
CAMP	820	LDG
CEACAM6	4680	LDG
CEACAM8	1088	LDG
CTSG	1511	LDG
DEFA4	1669	LDG
ELANE	1991	LDG
LCN2	3934	LDG
LTF	4057	LDG
MPO	4353	LDG
OLFM4	10562	LDG
RNASE3	6037	LDG
HLA-DMA	3108	MHC II
HLA-DMB	3109	MHC II
HLA-DPA1	3113	MHC II
HLA-DPB1	3115	MHC II
HLA-DPB2	3116	MHC II
HLA-DQA1	3117	MHC II
HLA-DQA2	3118	MHC II
HLA-DQB1	3119	MHC II
HLA-DQB2	3120	MHC II
HLA-DRA	3122	MHC II
HLA-DRB1	3123	MHC II
HLA-DRB3	3125	MHC II
HLA-DRB4	3126	MHC II
HLA-DRB5	3127	MHC II
HLA-DRB6	3128	MHC II
BST1	683	Monocyte
C1QA	712	Monocyte
C1QB	713	Monocyte
C1QC	714	Monocyte
C1R	715	Monocyte
C1RL	51279	Monocyte
CCL2	6347	Monocyte
CCL8	6355	Monocyte
CD14	929	Monocyte
CD163	9332	Monocyte
CD300C	10871	Monocyte
CD33	945	Monocyte
CD68	968	Monocyte
CLEC12A	160364	Monocyte
CLEC4D	338339	Monocyte
CLEC4E	26253	Monocyte
CSF2	1437	Monocyte
CXCL1	2919	Monocyte
CXCL2	2920	Monocyte
CXCR2	3579	Monocyte
FCGR1A	2209	Monocyte
FCGR1B	2210	Monocyte
FCGR3B	2215	Monocyte
FUT4	2526	Monocyte
GRN	2896	Monocyte
IK	3550	Monocyte
IL18RAP	8807	Monocyte
IL1B	3553	Monocyte
IL1RN	3557	Monocyte
LILRA5	353514	Monocyte
LILRA6	79168	Monocyte
LILRB2	10288	Monocyte
LILRB3	11025	Monocyte
MNDA	4332	Monocyte
MRC1	4360	Monocyte
OSCAR	126014	Monocyte
S100A8	6279	Monocyte
SEMA4A	64218	Monocyte
SIGLEC1	6614	Monocyte
THBD	7056	Monocyte
IKBKB	3551	NFkB Complex
IKBKG	8517	NFkB Complex
NFKB1	4790	NFkB Complex
NFKB2	4791	NFkB Complex
REL	5966	NFkB Complex
RELA	5970	NFkB Complex
RELB	5971	NFkB Complex
KLRF1	51348	NK Cell
KLRF1	51348	NK Cell
NCAM1	4684	NK Cell
NCAM1	4684	NK Cell
NCR1	9437	NK Cell
NCR1	9437	NK Cell
NCR3	259197	NK Cell
NCR3	259197	NK Cell
SH2D1B	117157	NK Cell
SH2D1B	117157	NK Cell
APP	351	NLRP3 Inflammasome
ATAT1	79969	NLRP3 Inflammasome
CARD8	22900	NLRP3 Inflammasome
CASP1	834	NLRP3 Inflammasome
CASP4	837	NLRP3 Inflammasome
CD36	948	NLRP3 Inflammasome
CPTP	80772	NLRP3 Inflammasome
DHX33	56919	NLRP3 Inflammasome
EIF2AK2	5610	NLRP3 Inflammasome
GBP5	115362	NLRP3 Inflammasome
GSDMD	79792	NLRP3 Inflammasome
HSP90AB1	3326	NLRP3 Inflammasome
MEFV	4210	NLRP3 Inflammasome
NFKB1	4790	NLRP3 Inflammasome
NFKB2	4791	NLRP3 Inflammasome
NLRC3	197358	NLRP3 Inflammasome
NLRP3	114548	NLRP3 Inflammasome
P2RX7	5027	NLRP3 Inflammasome
PANX1	24145	NLRP3 Inflammasome
PSTPIP1	9051	NLRP3 Inflammasome
PYCARD	29108	NLRP3 Inflammasome
PYDC2	152138	NLRP3 Inflammasome
RELA	5970	NLRP3 Inflammasome
SIRT2	22933	NLRP3 Inflammasome
SUGT1	10910	NLRP3 Inflammasome
TLR4	7099	NLRP3 Inflammasome
TLR6	10333	NLRP3 Inflammasome
TXN	7295	NLRP3 Inflammasome
TXNIP	10628	NLRP3 Inflammasome
USP50	373509	NLRP3 Inflammasome
ATP5A1	498	Oxidative Phosphorylation
ATP5B	506	Oxidative Phosphorylation
ATP5D	513	Oxidative Phosphorylation
ATP5E	514	Oxidative Phosphorylation
ATP5F1	515	Oxidative Phosphorylation
ATP5G1	516	Oxidative Phosphorylation
ATP5G2	517	Oxidative Phosphorylation
ATP5G3	518	Oxidative Phosphorylation
ATP5H	10476	Oxidative Phosphorylation
ATP5I	521	Oxidative Phosphorylation
ATP5J	522	Oxidative Phosphorylation
ATP5J2	9551	Oxidative Phosphorylation
ATP5L	10632	Oxidative Phosphorylation
ATP5O	539	Oxidative Phosphorylation
ATP5S	27109	Oxidative Phosphorylation
BCS1L	617	Oxidative Phosphorylation
CEP89	84902	Oxidative Phosphorylation
COA1	55744	Oxidative Phosphorylation
COA3	28958	Oxidative Phosphorylation
COA4	51287	Oxidative Phosphorylation
COA5	493753	Oxidative Phosphorylation
COA6	388753	Oxidative Phosphorylation
COA7	65260	Oxidative Phosphorylation
COX10	1352	Oxidative Phosphorylation
COX10-AS1	100874058	Oxidative Phosphorylation
COX11	1353	Oxidative Phosphorylation
COX14	84987	Oxidative Phosphorylation
COX15	1355	Oxidative Phosphorylation
COX16	51241	Oxidative Phosphorylation
COX17	10063	Oxidative Phosphorylation
COX18	285521	Oxidative Phosphorylation
COX19	90639	Oxidative Phosphorylation
COX20	116228	Oxidative Phosphorylation
COX4I1	1327	Oxidative Phosphorylation
COX4I2	84701	Oxidative Phosphorylation
COX5A	9377	Oxidative Phosphorylation
COX5B	1329	Oxidative Phosphorylation
COX6A1	1337	Oxidative Phosphorylation
COX6A2	1339	Oxidative Phosphorylation
COX6B1	1340	Oxidative Phosphorylation
COX6B2	125965	Oxidative Phosphorylation
COX6C	1345	Oxidative Phosphorylation
COX7A1	1346	Oxidative Phosphorylation
COX7A2	1347	Oxidative Phosphorylation
COX7A2L	9167	Oxidative Phosphorylation
COX7B	1349	Oxidative Phosphorylation
COX7B2	170712	Oxidative Phosphorylation
COX7C	1350	Oxidative Phosphorylation
COX8A	1351	Oxidative Phosphorylation
COX8C	341947	Oxidative Phosphorylation
CYC1	1537	Oxidative Phosphorylation
CYCS	54205	Oxidative Phosphorylation
DNAJC15	29103	Oxidative Phosphorylation
MT-ATP6	4508	Oxidative Phosphorylation
MT-ATP8	4509	Oxidative Phosphorylation
MT-CO1	4512	Oxidative Phosphorylation
MT-CO2	4513	Oxidative Phosphorylation
MT-CO3	4514	Oxidative Phosphorylation
MT-CYB	4519	Oxidative Phosphorylation
MT-ND1	4535	Oxidative Phosphorylation
MT-ND2	4536	Oxidative Phosphorylation
MT-ND3	4537	Oxidative Phosphorylation
MT-ND4	4538	Oxidative Phosphorylation
MT-ND4L	4539	Oxidative Phosphorylation
MT-ND5	4540	Oxidative Phosphorylation
MT-ND6	4541	Oxidative Phosphorylation
NDUFA1	4694	Oxidative Phosphorylation
NDUFA10	4705	Oxidative Phosphorylation
NDUFA11	126328	Oxidative Phosphorylation
NDUFA12	55967	Oxidative Phosphorylation
NDUFA13	51079	Oxidative Phosphorylation
NDUFA2	4695	Oxidative Phosphorylation
NDUFA3	4696	Oxidative Phosphorylation
NDUFA4	4697	Oxidative Phosphorylation
NDUFA4L2	56901	Oxidative Phosphorylation
NDUFA5	4698	Oxidative Phosphorylation
NDUFA6	4700	Oxidative Phosphorylation
NDUFA7	4701	Oxidative Phosphorylation
NDUFA8	4702	Oxidative Phosphorylation
NDUFA9	4704	Oxidative Phosphorylation
NDUFAB1	4706	Oxidative Phosphorylation
NDUFAF1	51103	Oxidative Phosphorylation
NDUFAF2	91942	Oxidative Phosphorylation
NDUFAF3	25915	Oxidative Phosphorylation
NDUFAF4	29078	Oxidative Phosphorylation
NDUFAF5	79133	Oxidative Phosphorylation
NDUFAF6	137682	Oxidative Phosphorylation
NDUFAF7	55471	Oxidative Phosphorylation
NDUFAF8	284184	Oxidative Phosphorylation
NDUFB1	4707	Oxidative Phosphorylation
NDUFB10	4716	Oxidative Phosphorylation
NDUFB11	54539	Oxidative Phosphorylation
NDUFB2	4708	Oxidative Phosphorylation
NDUFB2-AS1	100134713	Oxidative Phosphorylation
NDUFB3	4709	Oxidative Phosphorylation
NDUFB4	4710	Oxidative Phosphorylation
NDUFB5	4711	Oxidative Phosphorylation
NDUFB6	4712	Oxidative Phosphorylation
NDUFB7	4713	Oxidative Phosphorylation
NDUFB8	4714	Oxidative Phosphorylation
NDUFB9	4715	Oxidative Phosphorylation
NDUFC1	4717	Oxidative Phosphorylation
NDUFC2	4718	Oxidative Phosphorylation
NDUFS1	4719	Oxidative Phosphorylation
NDUFS2	4720	Oxidative Phosphorylation
NDUFS3	4722	Oxidative Phosphorylation
NDUFS4	4724	Oxidative Phosphorylation
NDUFS5	4725	Oxidative Phosphorylation
NDUFS6	4726	Oxidative Phosphorylation
NDUFS7	374291	Oxidative Phosphorylation
NDUFS8	4728	Oxidative Phosphorylation
NDUFV1	4723	Oxidative Phosphorylation
NDUFV2	4729	Oxidative Phosphorylation
NDUFV3	4731	Oxidative Phosphorylation
NUBPL	80224	Oxidative Phosphorylation
OXA1L	5018	Oxidative Phosphorylation
RFESD	317671	Oxidative Phosphorylation
SCO1	6341	Oxidative Phosphorylation
SCO2	9997	Oxidative Phosphorylation
SLC25A4	291	Oxidative Phosphorylation
SURF1	6834	Oxidative Phosphorylation
TACO1	51204	Oxidative Phosphorylation
TIMMDC1	51300	Oxidative Phosphorylation
TMEM126B	55863	Oxidative Phosphorylation
TRAP1	10131	Oxidative Phosphorylation
TTC19	54902	Oxidative Phosphorylation
UQCC1	55245	Oxidative Phosphorylation
UQCC2	84300	Oxidative Phosphorylation
UQCC3	790955	Oxidative Phosphorylation
UQCR10	29796	Oxidative Phosphorylation
UQCR11	10975	Oxidative Phosphorylation
UQCRB	7381	Oxidative Phosphorylation
UQCRC1	7384	Oxidative Phosphorylation
UQCRC2	7385	Oxidative Phosphorylation
UQCRFS1	7386	Oxidative Phosphorylation
UQCRH	7388	Oxidative Phosphorylation
UQCRHL	440567	Oxidative Phosphorylation
UQCRQ	27089	Oxidative Phosphorylation
CLEC4C	170482	pDC
NRP1	8829	pDC
G6PD	2539	Pentose Phosphate Signature
H6PD	9563	Pentose Phosphate Signature
PGD	5226	Pentose Phosphate Signature
PRPS1	5631	Pentose Phosphate Signature
PRPS1L1	221823	Pentose Phosphate Signature
PRPS2	5634	Pentose Phosphate Signature
RBKS	64080	Pentose Phosphate Signature
RGN	9104	Pentose Phosphate Signature
RPE	6120	Pentose Phosphate Signature
RPIA	22934	Pentose Phosphate Signature
TALDO1	6888	Pentose Phosphate Signature
TKT	7086	Pentose Phosphate Signature
TKTL1	8277	Pentose Phosphate Signature
TKTL2	84076	Pentose Phosphate Signature
C19orf10	56005	Plasma Cell
IGH	3492	Plasma Cell
IGHD	3495	Plasma Cell
IGHG1	3500	Plasma Cell
IGHMBP2	3508	Plasma Cell
IGHV2-5	28457	Plasma Cell
IGHV3-20	28445	Plasma Cell
IGHV3-23	28442	Plasma Cell
IGHV4-28	28400	Plasma Cell
IGHV4-31	28396	Plasma Cell
IGHV4-34	28395	Plasma Cell
IGK	50802	Plasma Cell
IGKC	3514	Plasma Cell
IGL	3535	Plasma Cell
IGLJ3	28831	Plasma Cell
IGLL1	3543	Plasma Cell
IGLV@	3546	Plasma Cell
IGLV1-40	28825	Plasma Cell
IGLV1-44	28823	Plasma Cell
IGLV2-14	28815	Plasma Cell
IGLV2-5	28818	Plasma Cell
IGLV3-1	28809	Plasma Cell
IGLV3-19	28797	Plasma Cell
IGLV3-25	28793	Plasma Cell
IGLV4-3	28786	Plasma Cell
IGLV4-60	28785	Plasma Cell
IGLV5-45	28781	Plasma Cell
IGLV6-57	28778	Plasma Cell
IGLVI-70	28763	Plasma Cell
MZB1	51237	Plasma Cell
PRDM1	639	Plasma Cell
SDC1	6382	Plasma Cell
THEMIS2	9473	Plasma Cell
TNFRSF17	608	Plasma Cell
GP1BA	2811	Platelets
GP5	2814	Platelets
GP6	51206	Platelets
GP9	2815	Platelets
LY6G6D	58530	Platelets
MMRN1	22915	Platelets
PEAR1	375033	Platelets
PF4	5196	Platelets
PF4V1	5197	Platelets
PPBP	5473	Platelets
SLC35D3	340146	Platelets
IL18	3606	Proinflammatory IL-1 Family
IL18R1	8809	Proinflammatory IL-1 Family
IL18RAP	8807	Proinflammatory IL-1 Family
IL1A	3552	Proinflammatory IL-1 Family
IL1B	3553	Proinflammatory IL-1 Family
IL1R1	3554	Proinflammatory IL-1 Family
IL1RAP	3556	Proinflammatory IL-1 Family
IL33	90865	Proinflammatory IL-1 Family
IL36A	27179	Proinflammatory IL-1 Family
IL36B	27177	Proinflammatory IL-1 Family
IL36G	56300	Proinflammatory IL-1 Family
ATOX1	475	ROS Protection
CCS	9973	ROS Protection
CYBA	1535	ROS Protection
CYBB	1536	ROS Protection
GPX1	2876	ROS Protection
GPX2	2877	ROS Protection
GPX3	2878	ROS Protection
GPX5	2880	ROS Protection
GPX6	257202	ROS Protection
GPX7	2882	ROS Protection
GPX8	493869	ROS Protection
GSR	2936	ROS Protection
GSTP1	2950	ROS Protection
NCF1	653361	ROS Protection
NCF2	4688	ROS Protection
NCF4	4689	ROS Protection
NOX4	50507	ROS Protection
NOX5	79400	ROS Protection
NUDT2	318	ROS Protection
P4HB	5034	ROS Protection
PRDX1	5052	ROS Protection
PRDX2	7001	ROS Protection
PRDX3	10935	ROS Protection
PRDX4	10549	ROS Protection
PRDX5	25824	ROS Protection
PRDX6	9588	ROS Protection
SOD1	6647	ROS Protection
SOD2	6648	ROS Protection
SOD3	6649	ROS Protection
TXN	7295	ROS Protection
TXN2	25828	ROS Protection
TXNRD1	7296	ROS Protection
TXNRD2	10587	ROS Protection
APOL6	80830	Suppressive Neutrophil
CARD16	114769	Suppressive Neutrophil
CCR1	1230	Suppressive Neutrophil
CLEC2B	9976	Suppressive Neutrophil
DDX60L	91351	Suppressive Neutrophil
EPSTI1	94240	Suppressive Neutrophil
FCER1G	2207	Suppressive Neutrophil
FFAR2	2867	Suppressive Neutrophil
GBP1	2633	Suppressive Neutrophil
GBP2	2634	Suppressive Neutrophil
GBP5	115362	Suppressive Neutrophil
IFI16	3428	Suppressive Neutrophil
IFI44	10561	Suppressive Neutrophil
IFI44L	10964	Suppressive Neutrophil
IFI6	2537	Suppressive Neutrophil
IFIH1	64135	Suppressive Neutrophil
IFIT1	3434	Suppressive Neutrophil
IFIT2	3433	Suppressive Neutrophil
IFIT3	3437	Suppressive Neutrophil
IFITM3	10410	Suppressive Neutrophil
IL1RN	3557	Suppressive Neutrophil
IRF7	3665	Suppressive Neutrophil
ISG15	9636	Suppressive Neutrophil
LIMK2	3985	Suppressive Neutrophil
LY6E	4061	Suppressive Neutrophil
LY96	23643	Suppressive Neutrophil
MT2A	4502	Suppressive Neutrophil
MX1	4599	Suppressive Neutrophil
NBN	4683	Suppressive Neutrophil
NFKBIA	4792	Suppressive Neutrophil
OAS1	4938	Suppressive Neutrophil
OAS2	4939	Suppressive Neutrophil
PLSCR1	5359	Suppressive Neutrophil
RNF213	57674	Suppressive Neutrophil
RSAD2	91543	Suppressive Neutrophil
SAMD9	54809	Suppressive Neutrophil
SAMD9L	219285	Suppressive Neutrophil
SELL	6402	Suppressive Neutrophil
SERPING1	710	Suppressive Neutrophil
SHISA5	51246	Suppressive Neutrophil
SP110	3431	Suppressive Neutrophil
TAP1	6890	Suppressive Neutrophil
TNFSF10	8743	Suppressive Neutrophil
TNFSF13B	10673	Suppressive Neutrophil
TRIM22	10346	Suppressive Neutrophil
XAF1	54739	Suppressive Neutrophil
CCR3	1232	T Cell
CD226	10666	T Cell
CD247	919	T Cell
CD28	940	T Cell
CD3D	915	T Cell
CD3E	916	T Cell
CD3G	917	T Cell
CD4	920	T Cell
CD5	921	T Cell
CD8A	925	T Cell
CD8B	926	T Cell
ETS1	2113	T Cell
GATA3	2625	T Cell
GRAP2	9402	T Cell
LEF1	51176	T Cell
SH2D1A	4068	T Cell
TRAC	28755	T Cell
TRBC1	28639	T Cell
TRDC	28526	T Cell
CD40LG	959	Tactivated
CREM	1390	Tactivated
FASLG	356	Tactivated
IL17A	3605	Tactivated
IL17F	112744	Tactivated
IL23R	149233	Tactivated
JAKMIP1	152789	Tactivated
KCNA3	3738	Tactivated
KCNN4	3783	Tactivated
P2RX5	5026	Tactivated
PRKCQ	5588	Tactivated
RELT	84957	Tactivated
RNF125	54941	Tactivated
SATB1	6304	Tactivated
TAGAP	117289	Tactivated
TNFRSF4	7293	Tactivated
TNFRSF9	3604	Tactivated
ACO2	50	TCA cycle
CS	1431	TCA cycle
DLAT	1737	TCA cycle
DLD	1738	TCA cycle
DLST	1743	TCA cycle
FH	2271	TCA cycle
GLUD1	2746	TCA cycle
IDH1	3417	TCA cycle
IDH2	3418	TCA cycle
IDH3A	3419	TCA cycle
IDH3B	3420	TCA cycle
IDH3G	3421	TCA cycle
MDH2	4191	TCA cycle
MPC1	51660	TCA cycle
MPC2	25874	TCA cycle
OGDH	4967	TCA cycle
OGDHL	55753	TCA cycle
PDHA1	5160	TCA cycle
PDHA2	5161	TCA cycle
PDHB	5162	TCA cycle
PDHX	8050	TCA cycle
PDK1	5163	TCA cycle
PDK2	5164	TCA cycle
PDK3	5165	TCA cycle
PDK4	5166	TCA cycle
PDP1	54704	TCA cycle
PDP2	57546	TCA cycle
PDPR	55066	TCA cycle
SDHA	6389	TCA cycle
SDHAF1	644096	TCA cycle
SDHAF2	54949	TCA cycle
SDHAF3	57001	TCA cycle
SDHAF4	135154	TCA cycle
SDHB	6390	TCA cycle
SDHC	6391	TCA cycle
SDHD	6392	TCA cycle
SUCLA2	8803	TCA cycle
SUCLG1	8802	TCA cycle
SUCLG2	8801	TCA cycle
SUGCT	79783	TCA cycle
ACLY	47	TNF
ACSL1	2180	TNF
ADGRE2	30817	TNF
AK3	50808	TNF
AKAP10	11216	TNF
AMPD3	272	TNF
APOL3	80833	TNF
ARID3A	1820	TNF
ARSE	415	TNF
ASAP1	50807	TNF
B4GALT5	9334	TNF
BCL2A1	597	TNF
BHLHE41	79365	TNF
BHMT	635	TNF
BIRC3	330	TNF
BRCA1	672	TNF
CALD1	800	TNF
CASP1	834	TNF
CASP10	843	TNF
CCL15	6359	TNF
CCL20	6364	TNF
CCL23	6368	TNF
CCL3L1	6349	TNF
CD37	951	TNF
CD38	952	TNF
CD83	9308	TNF
CDKN3	1033	TNF
CKB	1152	TNF
CR2	1380	TNF
CTNND2	1501	TNF
CXCL1	2919	TNF
CXCL2	2920	TNF
CXCL3	2921	TNF
CXCL8	3576	TNF
CYP27B1	1594	TNF
DAB2	1601	TNF
EBI3	10148	TNF
EGR1	1958	TNF
EGR2	1959	TNF
EPB41	2035	TNF
EREG	2069	TNF
ETAA1	54465	TNF
F3	2152	TNF
FABP1	2168	TNF
FBXL2	25827	TNF
FCER2	2208	TNF
FCGR2A	2212	TNF
FLJ11129	54674	TNF
FLNA	2316	TNF
G0S2	50486	TNF
GBP1	2633	TNF
GCH1	2643	TNF
GJB2	2706	TNF
GLS	2744	TNF
GMIP	51291	TNF
GP1BA	2811	TNF
GRK3	157	TNF
HCAR3	8843	TNF
HHEX	3087	TNF
HOMER2	9455	TNF
HP	3240	TNF
ICAM1	3383	TNF
IDO1	3620	TNF
IFI44	10561	TNF
IKBKG	8517	TNF
IL16	3603	TNF
IL18	3606	TNF
IL1A	3552	TNF
IL1B	3553	TNF
IL1RN	3557	TNF
IL6	3569	TNF
INHBA	3624	TNF
INSIG1	3638	TNF
ITGA6	3655	TNF
KITLG	4254	TNF
KLF1	10661	TNF
KMO	8564	TNF
LGALS3BP	3959	TNF
MAP3K4	4216	TNF
MARCKS	4082	TNF
MGLL	11343	TNF
MMP19	4327	TNF
MN1	4330	TNF
MRPS15	64960	TNF
MSC	9242	TNF
MTF1	4520	TNF
MX1	4599	TNF
NAMPT	10135	TNF
NELL2	4753	TNF
NFKB1	4790	TNF
NFKB2	4791	TNF
NFKBIA	4792	TNF
NFKBIZ	64332	TNF
NKX3-2	579	TNF
NR3C1	2908	TNF
OAS3	4940	TNF
PATJ	10207	TNF
PDE4DIP	9659	TNF
PDPN	10630	TNF
PIAS4	51588	TNF
PLAUR	5329	TNF
PTGES	9536	TNF
PTGS2	5743	TNF
RELB	5971	TNF
RPGR	6103	TNF
RPS9	6203	TNF
SDC4	6385	TNF
SERPIND1	3053	TNF
SFRP1	6422	TNF
SH3BP5	9467	TNF
SLAMF1	6504	TNF
SLC30A4	7782	TNF
SOD2	6648	TNF
SPI1	6688	TNF
SSPN	8082	TNF
STAT4	6775	TNF
TAF15	8148	TNF
TAP2	6891	TNF
TBX3	6926	TNF
TFF1	7031	TNF
TNF	7124	TNF
TNFAIP2	7127	TNF
TNFAIP3	7128	TNF
TNFRSF11A	8792	TNF
TRAF1	7185	TNF
TSC22D1	8848	TNF
TYROBP	7305	TNF
UBE2C	11065	TNF
VEGFA	7422	TNF
WT1	7490	TNF
FOXP3	50943	Treg
IKZF2	22807	Treg
B4GALT3	8703	Unfolded Protein
CALR	811	Unfolded Protein
CALU	813	Unfolded Protein
CANX	821	Unfolded Protein
CDS2	8760	Unfolded Protein
CHST12	55501	Unfolded Protein
CHST2	9435	Unfolded Protein
DERL1	79139	Unfolded Protein
DERL2	51009	Unfolded Protein
DNAJC3	5611	Unfolded Protein
EDEM2	55741	Unfolded Protein
EDEM3	80267	Unfolded Protein
EMC9	51016	Unfolded Protein
ERAP1	51752	Unfolded Protein
ERGIC2	51290	Unfolded Protein
ERO1L	30001	Unfolded Protein
EXT1	2131	Unfolded Protein
GALNT2	2590	Unfolded Protein
GOLT1B	51026	Unfolded Protein
HERPUD1	9709	Unfolded Protein
HYOU1	10525	Unfolded Protein
IER3IP1	51124	Unfolded Protein
IMPAD1	54928	Unfolded Protein
KDELC1	79070	Unfolded Protein
KDELR2	11014	Unfolded Protein
LMAN2	10960	Unfolded Protein
LPGAT1	9926	Unfolded Protein
MAN1A1	4121	Unfolded Protein
MANEA	79694	Unfolded Protein
MANF	7873	Unfolded Protein
NUCB2	4925	Unfolded Protein
PDIA4	9601	Unfolded Protein
PDIA6	10130	Unfolded Protein
PIGK	10026	Unfolded Protein
PPIB	5479	Unfolded Protein
SEC24D	9871	Unfolded Protein
SEC61G	23480	Unfolded Protein
SPCS3	60559	Unfolded Protein
SSR1	6745	Unfolded Protein
SSR3	6747	Unfolded Protein
TRAM1	23471	Unfolded Protein
TRAM2	9697	Unfolded Protein
UGGT1	56886	Unfolded Protein
XBP1	7494	Unfolded Protein
