# Supplementary material for: Classification of COVID-19 Patients into Clinically Relevant Subsets by a Novel Machine Learning Pipeline Using Transcriptomic Features
Source: Int J Mol Sci. 2023 Mar 3;24(5):4905. doi: 10.3390/ijms24054905 (PMC10002748; doi:10.3390/ijms24054905)
Supplement: Supplementary file 1 [file ijms-24-04905-s001.zip › Table S2-Machine Learning Algorithm Performance.xlsx]

## Sheet: All COVID vs Healthy
	Machine Learning Round 1							Machine Learning Round 2							Machine Learning Round 3
1	Model	ROC Curve AUC	Precision/Recall AUC	Sensitivity	Specificity	Accuracy		Model	ROC Curve AUC	Precision/Recall AUC	Sensitivity	Specificity	Accuracy		Model	ROC Curve AUC	Precision/Recall AUC	Sensitivity	Specificity	Accuracy
	SVM	1	1	1	1	1		SVM	0.997	0.997	0.94	0.98	0.96		LR	1	1	1	1	1
	RF	1	1	0.97	1	0.99		RF	0.996	0.995	0.94	0.93	0.94		RF	1	1	1	1	1
	GB	1	1	0.97	1	0.99		ADB	0.979	0.97	0.94	0.93	0.94		ADB	1	1	1	1	1
	DTREE	0.985	0.992	0.97	1	0.99		GB	0.991	0.989	0.91	0.93	0.92		NB	0.999316	0.999147	1	0.98	0.99
	ADB	0.999	0.999	0.94	1	0.97		KNN	0.967	0.979	0.79	1	0.91		SVM	1	1	0.97	1	0.99
	NB	0.987	0.984	1	0.86	0.92		LDA	0.949	0.957	0.85	0.95	0.91		GB	0.983926	0.990198	0.97	1	0.99
	LR	0.953	0.959	0.88	0.95	0.92		NB	0.975	0.971	0.97	0.79	0.87		LDA	0.970588	0.983467	0.94	1	0.97
	LDA	0.953	0.956	0.79	0.93	0.87		DTREE	0.906	0.922	0.88	0.93	0.91		KNN	0.985294	0.991788	0.91	1	0.96
	KNN	0.964	0.976	0.68	1	0.86		LR	0.941	0.945	0.85	0.84	0.84		DTREE	0.962038	0.963216	0.97	0.95	0.96
2	Model	ROC Curve AUC	Precision/Recall AUC	Sensitivity	Specificity	Accuracy		Model	ROC Curve AUC	Precision/Recall AUC	Sensitivity	Specificity	Accuracy		Model	ROC Curve AUC	Precision/Recall AUC	Sensitivity	Specificity	Accuracy
	SVM	1	1	1	1	1		SVM	1	1	1	1	1		RF	1	1	1	1	1
	RF	0.999316	0.999147	0.97	1	0.99		RF	0.997264	0.996862	0.97	0.98	0.97		ADB	1	1	1	1	1
	ADB	0.997948	0.997364	0.97	0.98	0.97		ADB	0.994528	0.992903	1	0.93	0.96		NB	0.999316	0.999147	1	0.98	0.99
	GB	0.999316	0.999147	0.94	1	0.97		GB	0.995212	0.994396	0.91	1	0.96		LR	1	1	0.97	1	0.99
	NB	0.987004	0.985557	0.97	0.88	0.92		NB	0.99316	0.993238	0.97	0.91	0.94		SVM	1	1	0.97	1	0.99
	LDA	0.97264	0.978776	0.82	1	0.92		LDA	0.934337	0.952272	0.82	1	0.92		GB	0.998632	0.998269	0.97	0.98	0.97
	LR	0.956224	0.956358	0.82	0.98	0.91		DTREE	0.924077	0.92802	0.94	0.91	0.92		LDA	0.970588	0.983467	0.94	1	0.97
	DTREE	0.914843	0.942271	0.85	0.98	0.92		KNN	0.98119	0.986746	0.74	1	0.88		KNN	0.985294	0.991788	0.91	1	0.96
	KNN	0.980848	0.985894	0.68	1	0.86		LR	0.919973	0.939803	0.79	1	0.91		DTREE	0.95896	0.968424	0.94	0.98	0.96
3	Model	ROC Curve AUC	Precision/Recall AUC	Sensitivity	Specificity	Accuracy		Model	ROC Curve AUC	Precision/Recall AUC	Sensitivity	Specificity	Accuracy		Model	ROC Curve AUC	Precision/Recall AUC	Sensitivity	Specificity	Accuracy
	SVM	1	1	1	1	1		SVM	1	1	0.97	1	0.99		LR	1	1	1	1	1
	RF	0.998974	0.99875	0.97	1	0.99		GB	0.997948	0.997582	0.97	0.98	0.97		RF	1	1	1	1	1
	GB	0.99658	0.99618	0.97	1	0.99		RF	1	1	0.94	1	0.97		ADB	0.998632	0.998269	1	0.98	0.99
	ADB	0.999316	0.999147	0.94	1	0.97		NB	0.992476	0.991719	0.94	0.98	0.96		SVM	1	1	0.97	1	0.99
	NB	0.991792	0.989398	0.97	0.91	0.94		ADB	0.995896	0.994881	0.94	0.95	0.95		GB	1	1	0.97	1	0.99
	LDA	0.97606	0.981062	0.82	1	0.92		DTREE	0.95896	0.968424	0.94	0.98	0.96		DTREE	0.985294	0.991788	0.97	1	0.99
	LR	0.9658	0.969495	0.85	0.98	0.92		LR	0.942544	0.950846	0.82	1	0.92		NB	0.98803	0.984874	1	0.95	0.97
	KNN	0.985294	0.991788	0.68	1	0.86		KNN	0.955882	0.975363	0.79	1	0.91		LDA	0.970588	0.983467	0.94	1	0.97
	DTREE	0.871409	0.883817	0.88	0.86	0.87		LDA	0.959644	0.969899	0.79	1	0.91		KNN	0.981532	0.987192	0.91	1	0.96
4	Model	ROC Curve AUC	Precision/Recall AUC	Sensitivity	Specificity	Accuracy		Model	ROC Curve AUC	Precision/Recall AUC	Sensitivity	Specificity	Accuracy		Model	ROC Curve AUC	Precision/Recall AUC	Sensitivity	Specificity	Accuracy
	SVM	1	1	1	1	1		RF	1	1	1	1	1		LR	1	1	1	1	1
	GB	0.997264	0.996862	0.97	1	0.99		SVM	1	1	1	1	1		RF	1	1	1	1	1
	RF	0.99829	0.99791	0.97	0.95	0.96		ADB	0.997948	0.997364	1	0.98	0.99		ADB	1	1	1	1	1
	NB	0.992476	0.991609	1	0.86	0.92		GB	0.997948	0.997582	0.97	1	0.99		NB	0.999316	0.999147	1	0.98	0.99
	ADB	0.98974	0.987763	0.97	0.88	0.92		LDA	0.967168	0.969767	0.88	1	0.95		GB	0.998632	0.998269	1	0.98	0.99
	DTREE	0.938782	0.937734	0.97	0.91	0.94		NB	0.989056	0.987989	0.97	0.86	0.91		SVM	1	1	0.97	1	0.99
	LR	0.94528	0.951477	0.85	0.95	0.91		KNN	0.968536	0.980901	0.71	1	0.87		LDA	0.970588	0.983467	0.94	1	0.97
	LDA	0.954172	0.959709	0.76	0.95	0.87		LR	0.935021	0.941357	0.85	0.84	0.84		KNN	0.982558	0.988377	0.91	1	0.96
	KNN	0.982558	0.988426	0.62	1	0.83		DTREE	0.827291	0.851604	0.79	0.86	0.83		DTREE	0.95896	0.968424	0.94	0.98	0.96
5	Model	ROC Curve AUC	Precision/Recall AUC	Sensitivity	Specificity	Accuracy		Model	ROC Curve AUC	Precision/Recall AUC	Sensitivity	Specificity	Accuracy		Model	ROC Curve AUC	Precision/Recall AUC	Sensitivity	Specificity	Accuracy
	SVM	1	1	1	1	1		SVM	1	1	1	1	1		LR	1	1	1	1	1
	RF	1	1	0.97	1	0.99		RF	1	1	0.97	1	0.99		RF	1	1	1	1	1
	GB	0.999316	0.999147	0.97	1	0.99		ADB	0.991792	0.989274	0.94	0.95	0.95		ADB	1	1	1	1	1
	ADB	0.997264	0.99643	0.94	0.98	0.96		GB	0.997264	0.996862	0.85	1	0.94		SVM	1	1	0.97	1	0.99
	DTREE	0.962038	0.963216	0.97	0.95	0.96		NB	0.983584	0.97957	0.97	0.88	0.92		NB	0.997948	0.997465	1	0.95	0.97
	NB	0.990424	0.988514	1	0.86	0.92		LDA	0.968536	0.970613	0.82	1	0.92		GB	0.997606	0.997057	1	0.95	0.97
	LR	0.952804	0.956144	0.85	0.93	0.9		KNN	0.954172	0.973065	0.79	1	0.91		LDA	0.970588	0.983467	0.94	1	0.97
	KNN	0.978454	0.983838	0.74	1	0.88		DTREE	0.911765	0.950726	0.82	1	0.92		KNN	0.985294	0.991788	0.91	1	0.96
	LDA	0.9658	0.966928	0.76	0.98	0.88		LR	0.959644	0.958847	0.85	0.93	0.9		DTREE	0.947332	0.954163	0.94	0.95	0.95
6	Model	ROC Curve AUC	Precision/Recall AUC	Sensitivity	Specificity	Accuracy		Model	ROC Curve AUC	Precision/Recall AUC	Sensitivity	Specificity	Accuracy		Model	ROC Curve AUC	Precision/Recall AUC	Sensitivity	Specificity	Accuracy
	SVM	1	1	1	1	1		SVM	1	1	0.97	1	0.99		LR	1	1	1	1	1
	ADB	1	1	1	0.98	0.99		RF	0.999316	0.999147	0.97	1	0.99		RF	1	1	1	1	1
	RF	0.999316	0.999183	0.97	1	0.99		ADB	0.995896	0.994972	0.94	0.95	0.95		ADB	1	1	1	1	1
	GB	0.995212	0.994916	0.97	0.93	0.95		GB	0.992476	0.990505	0.88	0.98	0.94		SVM	1	1	0.97	1	0.99
	NB	0.990424	0.988394	0.97	0.86	0.91		NB	0.987004	0.984346	0.94	0.91	0.92		DTREE	0.988372	0.985714	1	0.98	0.99
	KNN	0.978796	0.983801	0.76	1	0.9		LR	0.959644	0.966864	0.82	1	0.92		GB	0.98803	0.984874	0.97	0.98	0.97
	LDA	0.957592	0.961506	0.79	0.95	0.88		LDA	0.943228	0.962373	0.82	1	0.92		NB	0.999316	0.999147	1	0.93	0.96
	LR	0.949384	0.949923	0.82	0.86	0.84		KNN	0.970588	0.983575	0.76	1	0.9		KNN	0.998632	0.998366	0.91	1	0.96
	DTREE	0.845075	0.861716	0.85	0.84	0.84		DTREE	0.888509	0.917392	0.82	0.95	0.9		LDA	0.970588	0.983467	0.94	1	0.97
7	Model	ROC Curve AUC	Precision/Recall AUC	Sensitivity	Specificity	Accuracy		Model	ROC Curve AUC	Precision/Recall AUC	Sensitivity	Specificity	Accuracy		Model	ROC Curve AUC	Precision/Recall AUC	Sensitivity	Specificity	Accuracy
	SVM	1	1	1	1	1		SVM	1	1	1	1	1		LR	1	1	1	1	1
	RF	0.997264	0.996862	0.97	1	0.99		RF	0.996238	0.995273	0.97	0.95	0.96		RF	1	1	1	1	1
	GB	0.997264	0.996862	0.97	1	0.99		GB	0.995896	0.994798	0.94	0.95	0.95		ADB	1	1	1	1	1
	ADB	0.995896	0.994661	0.97	0.98	0.97		NB	0.989056	0.986008	0.97	0.91	0.94		GB	0.999316	0.999147	1	0.98	0.99
	NB	0.992476	0.990468	0.97	0.91	0.94		DTREE	0.953488	0.947368	1	0.91	0.95		SVM	1	1	0.97	1	0.99
	DTREE	0.955882	0.975363	0.91	1	0.96		ADB	0.993844	0.993046	0.97	0.88	0.92		NB	0.999316	0.999147	1	0.95	0.97
	LDA	0.980848	0.985364	0.85	1	0.94		LDA	0.939808	0.958363	0.82	1	0.92		LDA	0.970588	0.983467	0.94	1	0.97
	LR	0.971272	0.971013	0.82	1	0.92		LR	0.934337	0.947964	0.85	0.91	0.88		KNN	0.985294	0.991788	0.91	1	0.96
	KNN	0.985294	0.991788	0.65	1	0.84		KNN	0.933653	0.95653	0.71	1	0.87		DTREE	0.95896	0.968424	0.94	0.98	0.96
8	Model	ROC Curve AUC	Precision/Recall AUC	Sensitivity	Specificity	Accuracy		Model	ROC Curve AUC	Precision/Recall AUC	Sensitivity	Specificity	Accuracy		Model	ROC Curve AUC	Precision/Recall AUC	Sensitivity	Specificity	Accuracy
	SVM	1	1	1	1	1		RF	1	1	0.97	1	0.99		RF	1	1	1	1	1
	RF	1	1	0.97	1	0.99		DTREE	0.985294	0.991788	0.97	1	0.99		ADB	1	1	1	1	1
	ADB	0.999316	0.999147	0.97	0.98	0.97		SVM	1	1	0.94	1	0.97		NB	0.999316	0.999147	1	0.98	0.99
	GB	0.998632	0.998343	0.94	1	0.97		GB	0.998632	0.998343	0.94	1	0.97		LR	1	1	0.97	1	0.99
	LDA	0.971272	0.979492	0.82	1	0.92		ADB	0.99316	0.991604	0.91	0.98	0.95		SVM	1	1	0.97	1	0.99
	DTREE	0.929549	0.951021	0.88	0.98	0.94		NB	0.988372	0.987158	0.94	0.93	0.94		DTREE	0.985294	0.991788	0.97	1	0.99
	NB	0.97606	0.971447	0.97	0.84	0.9		LDA	0.974008	0.977314	0.82	1	0.92		GB	0.98461	0.990947	0.97	1	0.99
	LR	0.950752	0.955304	0.85	0.95	0.91		LR	0.963748	0.964348	0.85	0.98	0.92		LDA	0.970588	0.983467	0.94	1	0.97
	KNN	0.983926	0.990058	0.71	1	0.87		KNN	0.970588	0.983575	0.76	1	0.9		KNN	0.984268	0.99049	0.91	1	0.96
9	Model	ROC Curve AUC	Precision/Recall AUC	Sensitivity	Specificity	Accuracy		Model	ROC Curve AUC	Precision/Recall AUC	Sensitivity	Specificity	Accuracy		Model	ROC Curve AUC	Precision/Recall AUC	Sensitivity	Specificity	Accuracy
	SVM	1	1	1	0.98	0.99		SVM	1	1	0.97	1	0.99		RF	1	1	1	1	1
	RF	0.997264	0.996862	0.97	0.98	0.97		RF	0.997948	0.997582	0.97	1	0.99		ADB	1	1	1	1	1
	GB	0.997264	0.996862	0.97	0.98	0.97		GB	0.991792	0.990993	0.94	1	0.97		LR	1	1	0.97	1	0.99
	ADB	0.995212	0.993436	0.94	0.98	0.96		ADB	0.998632	0.998269	0.94	0.98	0.96		SVM	1	1	0.97	1	0.99
	NB	0.993844	0.992814	0.97	0.93	0.95		LDA	0.961012	0.961911	0.85	0.98	0.92		LDA	0.970588	0.983467	0.94	1	0.97
	LDA	0.97264	0.98122	0.79	1	0.91		NB	0.977428	0.972487	0.94	0.86	0.9		NB	0.97606	0.970612	0.97	0.95	0.96
	DTREE	0.924077	0.92802	0.94	0.91	0.92		KNN	0.985294	0.991788	0.76	1	0.9		KNN	0.978112	0.982798	0.88	0.95	0.92
	LR	0.954172	0.958734	0.85	0.93	0.9		LR	0.926813	0.933029	0.82	0.91	0.87		GB	0.904241	0.899638	0.97	0.81	0.88
	KNN	0.985294	0.991788	0.62	1	0.83		DTREE	0.847469	0.882577	0.76	0.93	0.86		DTREE	0.892271	0.894227	0.97	0.81	0.88
10	Model	ROC Curve AUC	Precision/Recall AUC	Sensitivity	Specificity	Accuracy		Model	ROC Curve AUC	Precision/Recall AUC	Sensitivity	Specificity	Accuracy		Model	ROC Curve AUC	Precision/Recall AUC	Sensitivity	Specificity	Accuracy
	SVM	1	1	1	1	1		SVM	1	1	1	0.98	0.99		LR	1	1	1	1	1
	RF	0.999658	0.99958	0.97	1	0.99		RF	0.998632	0.998269	0.97	0.98	0.97		RF	1	1	1	1	1
	NB	0.997948	0.997582	0.97	1	0.99		GB	0.997264	0.996559	0.94	0.98	0.96		ADB	1	1	1	1	1
	GB	0.99658	0.99618	0.97	1	0.99		ADB	0.993844	0.991985	0.97	0.95	0.96		SVM	1	1	0.97	1	0.99
	DTREE	0.985294	0.991788	0.97	1	0.99		NB	0.991792	0.989254	0.97	0.91	0.94		NB	1	1	0.97	1	0.99
	ADB	0.999316	0.999147	0.94	1	0.97		DTREE	0.947332	0.954163	0.94	0.95	0.95		GB	1	1	0.94	1	0.97
	LR	0.967852	0.969397	0.85	1	0.94		KNN	0.99487	0.993666	0.82	1	0.92		DTREE	0.970588	0.983575	0.94	1	0.97
	LDA	0.976744	0.983925	0.79	1	0.91		LR	0.969904	0.969515	0.85	0.98	0.92		LDA	0.970588	0.983467	0.94	1	0.97
	KNN	0.96922	0.981793	0.62	1	0.83		LDA	0.961012	0.962684	0.82	0.95	0.9		KNN	0.985294	0.991788	0.88	1	0.95

## Sheet: Non-critical COVID vs Healthy
	Machine Learning Round 1							Machine Learning Round 2							Machine Learning Round 3
1	Model	ROC Curve AUC	Precision/Recall AUC	Sensitivity	Specificity	Accuracy		Model	ROC Curve AUC	Precision/Recall AUC	Sensitivity	Specificity	Accuracy		Model	ROC Curve AUC	Precision/Recall AUC	Sensitivity	Specificity	Accuracy
	SVM	1	1	1	1	1		SVM	1	1	1	1	1		LR	1	1	1	1	1
	LDA	0.997	0.996	0.88	1	0.94		LDA	1	1	1	1	1		RF	1	1	1	1	1
	RF	0.982	0.98	0.94	0.95	0.94		GB	1	1	1	1	1		ADB	1	1	1	0.95	0.97
	LR	0.967	0.966	0.81	1	0.91		RF	1	1	1	0.95	0.97		SVM	1	1	0.94	1	0.97
	GB	0.964	0.959	1	0.79	0.89		ADB	0.99	0.988	1	0.89	0.94		GB	1	1	0.94	1	0.97
	ADB	0.961	0.954	1	0.79	0.89		LR	0.984	0.983	0.94	0.89	0.91		NB	0.970395	0.970395	1	0.95	0.97
	NB	0.964	0.955	1	0.63	0.8		KNN	0.965	0.979	0.69	1	0.86		DTREE	0.96875	0.96875	0.94	1	0.97
	DTREE	0.863	0.878	0.94	0.79	0.86		NB	0.947	0.929	0.88	0.84	0.86		LDA	0.894737	0.894737	0.94	0.89	0.91
	KNN	0.906	0.927	0.44	1	0.74		DTREE	0.822	0.861	0.75	0.89	0.83		KNN	0.932566	0.932566	0.62	1	0.83
2	Model	ROC Curve AUC	Precision/Recall AUC	Sensitivity	Specificity	Accuracy		Model	ROC Curve AUC	Precision/Recall AUC	Sensitivity	Specificity	Accuracy		Model	ROC Curve AUC	Precision/Recall AUC	Sensitivity	Specificity	Accuracy
	SVM	1	1	1	0.95	0.97		RF	0.983553	0.983553	1	0.95	0.97		LR	1	1	1	1	1
	ADB	0.993421	0.992172	1	0.95	0.97		SVM	0.970395	0.970395	1	0.95	0.97		ADB	0.996711	0.996711	1	0.95	0.97
	LDA	0.996711	0.996209	0.94	0.95	0.94		LDA	0.996711	0.996711	0.94	0.95	0.94		RF	1	1	0.94	1	0.97
	GB	0.983553	0.980953	1	0.89	0.94		ADB	0.957237	0.957237	0.94	0.84	0.89		SVM	1	1	0.94	1	0.97
	RF	0.978618	0.974938	1	0.89	0.94		LR	0.950658	0.950658	0.81	0.95	0.89		LDA	1	1	0.94	1	0.97
	LR	0.967105	0.962431	0.88	0.89	0.89		GB	0.967105	0.967105	0.75	0.95	0.86		NB	0.970395	0.970395	1	0.95	0.97
	NB	0.957237	0.948167	1	0.74	0.86		NB	0.940789	0.940789	0.88	0.84	0.86		KNN	1	1	0.81	1	0.91
	DTREE	0.837171	0.858036	0.94	0.74	0.83		KNN	0.940789	0.940789	0.69	0.95	0.83		DTREE	0.942434	0.942434	0.94	0.95	0.94
	KNN	0.856908	0.882701	0.44	1	0.74		DTREE	0.863487	0.863487	0.94	0.79	0.86		GB	0.9375	0.9375	0.94	0.95	0.94
3	Model	ROC Curve AUC	Precision/Recall AUC	Sensitivity	Specificity	Accuracy		Model	ROC Curve AUC	Precision/Recall AUC	Sensitivity	Specificity	Accuracy		Model	ROC Curve AUC	Precision/Recall AUC	Sensitivity	Specificity	Accuracy
	SVM	1	1	1	0.95	0.97		LDA	1	1	1	1	1		LR	1	1	1	1	1
	LDA	0.996711	0.996209	0.94	1	0.97		SVM	1	1	1	0.95	0.97		RF	1	1	0.94	1	0.97
	RF	0.978618	0.973132	1	0.89	0.94		LR	0.947368	0.947368	0.88	0.89	0.89		ADB	0.996711	0.996711	0.94	1	0.97
	ADB	0.993421	0.992172	1	0.84	0.91		KNN	0.924342	0.924342	0.75	1	0.89		SVM	0.996711	0.996711	0.94	0.95	0.94
	LR	0.973684	0.973648	0.88	0.95	0.91		DTREE	0.894737	0.894737	1	0.79	0.89		NB	0.970395	0.970395	1	0.89	0.94
	GB	0.980263	0.978828	0.94	0.84	0.89		ADB	0.9375	0.9375	0.94	0.79	0.86		KNN	0.957237	0.957237	0.69	1	0.86
	NB	0.930921	0.907135	1	0.79	0.89		GB	0.930921	0.930921	0.88	0.84	0.86		GB	0.935855	0.935855	0.94	0.79	0.86
	DTREE	0.858553	0.877836	0.88	0.84	0.86		RF	0.934211	0.934211	0.88	0.79	0.83		DTREE	0.863487	0.863487	0.94	0.79	0.86
	KNN	0.911184	0.931216	0.38	1	0.71		NB	0.904605	0.904605	0.88	0.74	0.8		LDA	0.731908	0.731908	0.69	0.84	0.77
4	Model	ROC Curve AUC	Precision/Recall AUC	Sensitivity	Specificity	Accuracy		Model	ROC Curve AUC	Precision/Recall AUC	Sensitivity	Specificity	Accuracy		Model	ROC Curve AUC	Precision/Recall AUC	Sensitivity	Specificity	Accuracy
	SVM	1	1	1	1	1		SVM	1	1	1	1	1		LR	1	1	1	0.95	0.97
	LDA	0.996711	0.996209	0.94	1	0.97		LDA	1	1	1	1	1		RF	1	1	0.94	1	0.97
	ADB	0.986842	0.984499	1	0.84	0.91		RF	0.996711	0.996711	0.94	0.95	0.94		SVM	0.996711	0.996711	0.94	0.95	0.94
	LR	0.983553	0.981506	0.88	0.95	0.91		LR	0.990132	0.990132	0.88	1	0.94		NB	0.934211	0.934211	1	0.84	0.91
	NB	0.967105	0.959113	1	0.84	0.91		DTREE	0.942434	0.942434	0.94	0.95	0.94		LDA	0.986842	0.986842	0.94	0.79	0.86
	GB	0.947368	0.944444	1	0.84	0.91		NB	0.967105	0.967105	1	0.84	0.91		KNN	0.919408	0.919408	0.81	1	0.91
	DTREE	0.921053	0.921053	1	0.84	0.91		GB	0.958882	0.958882	0.88	0.95	0.91		ADB	0.935855	0.935855	0.94	0.79	0.86
	RF	0.973684	0.968534	0.81	0.89	0.86		ADB	0.980263	0.980263	0.94	0.84	0.89		DTREE	0.863487	0.863487	0.94	0.79	0.86
	KNN	0.919408	0.940911	0.44	1	0.74		KNN	0.949013	0.949013	0.69	1	0.86		GB	0.863487	0.863487	0.94	0.79	0.86
5	Model	ROC Curve AUC	Precision/Recall AUC	Sensitivity	Specificity	Accuracy		Model	ROC Curve AUC	Precision/Recall AUC	Sensitivity	Specificity	Accuracy		Model	ROC Curve AUC	Precision/Recall AUC	Sensitivity	Specificity	Accuracy
	SVM	0.980263	0.972768	1	0.84	0.91		SVM	1	1	1	1	1		LR	1	1	1	1	1
	LDA	0.970395	0.956847	1	0.84	0.91		LDA	0.996711	0.996711	0.94	0.95	0.94		RF	1	1	0.94	1	0.97
	RF	0.949013	0.935824	0.88	0.89	0.89		RF	0.976974	0.976974	0.88	0.89	0.89		SVM	1	1	0.94	1	0.97
	LR	0.9375	0.940637	0.88	0.89	0.89		GB	0.963816	0.963816	0.94	0.84	0.89		ADB	0.996711	0.996711	0.94	1	0.97
	GB	0.953947	0.933906	0.69	0.95	0.83		LR	0.960526	0.960526	0.81	0.95	0.89		DTREE	0.973684	0.973684	1	0.95	0.97
	NB	0.925987	0.915889	1	0.68	0.83		ADB	0.953947	0.953947	0.94	0.74	0.83		NB	0.970395	0.970395	1	0.95	0.97
	ADB	0.898026	0.879216	0.88	0.79	0.83		KNN	0.896382	0.896382	0.62	1	0.83		KNN	0.996711	0.996711	0.75	1	0.89
	DTREE	0.786184	0.85276	0.62	0.95	0.8		NB	0.904605	0.904605	0.81	0.79	0.8		LDA	0.934211	0.934211	0.94	0.89	0.91
	KNN	0.911184	0.931216	0.38	1	0.71		DTREE	0.832237	0.832237	0.88	0.79	0.83		GB	0.958882	0.958882	0.94	0.74	0.83
6	Model	ROC Curve AUC	Precision/Recall AUC	Sensitivity	Specificity	Accuracy		Model	ROC Curve AUC	Precision/Recall AUC	Sensitivity	Specificity	Accuracy		Model	ROC Curve AUC	Precision/Recall AUC	Sensitivity	Specificity	Accuracy
	SVM	1	1	1	1	1		SVM	1	1	1	1	1		LR	1	1	1	1	1
	LDA	1	1	0.94	1	0.97		LDA	1	1	1	1	1		RF	1	1	0.94	1	0.97
	RF	0.993421	0.992851	1	0.89	0.94		DTREE	0.96875	0.96875	0.94	1	0.97		SVM	1	1	0.94	1	0.97
	GB	0.967105	0.967558	0.94	0.95	0.94		GB	0.962171	0.962171	0.94	1	0.97		ADB	0.996711	0.996711	1	0.89	0.94
	LR	0.973684	0.972133	0.81	0.95	0.89		RF	0.996711	0.996711	0.94	0.95	0.94		NB	0.967105	0.967105	1	0.89	0.94
	NB	0.957237	0.950862	1	0.68	0.83		LR	0.983553	0.983553	0.81	1	0.91		KNN	0.993421	0.993421	0.69	1	0.86
	ADB	0.888158	0.834468	0.81	0.79	0.8		KNN	0.952303	0.952303	0.69	1	0.86		LDA	0.851974	0.851974	1	0.74	0.86
	KNN	0.866776	0.89462	0.38	1	0.71		NB	0.940789	0.940789	0.88	0.79	0.83		DTREE	0.842105	0.842105	1	0.68	0.83
	DTREE	0.733553	0.78283	0.62	0.84	0.74		ADB	0.940789	0.940789	0.75	0.89	0.83		GB	0.842105	0.842105	1	0.68	0.83
7	Model	ROC Curve AUC	Precision/Recall AUC	Sensitivity	Specificity	Accuracy		Model	ROC Curve AUC	Precision/Recall AUC	Sensitivity	Specificity	Accuracy		Model	ROC Curve AUC	Precision/Recall AUC	Sensitivity	Specificity	Accuracy
	SVM	1	1	1	0.95	0.97		LDA	0.996711	0.996711	1	0.95	0.97		LR	1	1	1	1	1
	RF	0.995066	0.994256	1	0.95	0.97		SVM	0.970395	0.970395	1	0.89	0.94		RF	1	1	0.94	1	0.97
	LDA	0.996711	0.996209	0.94	0.95	0.94		GB	0.944079	0.944079	0.94	0.89	0.91		SVM	1	1	0.94	1	0.97
	ADB	0.990132	0.989857	0.94	0.95	0.94		DTREE	0.916118	0.916118	0.94	0.89	0.91		ADB	1	1	0.94	1	0.97
	LR	0.983553	0.979863	0.81	0.95	0.89		ADB	0.967105	0.967105	1	0.74	0.86		LDA	0.986842	0.986842	0.94	1	0.97
	NB	0.947368	0.940018	1	0.74	0.86		RF	0.960526	0.960526	0.94	0.74	0.83		NB	0.970395	0.970395	1	0.95	0.97
	GB	0.939145	0.926552	0.81	0.89	0.86		LR	0.914474	0.914474	0.88	0.84	0.86		DTREE	0.942434	0.942434	0.94	0.95	0.94
	KNN	0.919408	0.941964	0.38	1	0.71		NB	0.927632	0.927632	0.94	0.63	0.77		GB	0.940789	0.940789	0.94	0.89	0.91
	DTREE	0.738487	0.781845	0.69	0.79	0.74		KNN	0.924342	0.924342	0.56	0.89	0.74		KNN	0.996711	0.996711	0.69	1	0.86
8	Model	ROC Curve AUC	Precision/Recall AUC	Sensitivity	Specificity	Accuracy		Model	ROC Curve AUC	Precision/Recall AUC	Sensitivity	Specificity	Accuracy		Model	ROC Curve AUC	Precision/Recall AUC	Sensitivity	Specificity	Accuracy
	LDA	1	1	1	0.95	0.97		LDA	1	1	1	1	1		RF	1	1	1	1	1
	SVM	0.986842	0.983221	1	0.95	0.97		RF	0.976974	0.976974	1	0.95	0.97		ADB	1	1	1	0.95	0.97
	RF	0.963816	0.957423	0.94	0.84	0.89		DTREE	0.96875	0.96875	0.94	1	0.97		SVM	0.986842	0.986842	1	0.89	0.94
	GB	0.917763	0.893494	1	0.84	0.91		ADB	1	1	1	0.89	0.94		LR	0.983553	0.983553	1	0.89	0.94
	NB	0.927632	0.91323	1	0.79	0.89		SVM	0.993421	0.993421	0.94	0.95	0.94		NB	0.947368	0.947368	1	0.89	0.94
	LR	0.960526	0.956443	0.81	0.84	0.83		GB	0.993421	0.993421	0.94	0.95	0.94		GB	0.970395	0.970395	1	0.84	0.91
	DTREE	0.858553	0.877836	0.88	0.84	0.86		NB	0.953947	0.953947	0.94	0.89	0.91		DTREE	0.921053	0.921053	1	0.84	0.91
	ADB	0.935855	0.90811	0.75	0.89	0.83		LR	0.963816	0.963816	0.75	0.95	0.86		KNN	0.921053	0.921053	0.62	1	0.83
	KNN	0.909539	0.932861	0.62	1	0.83		KNN	0.912829	0.912829	0.5	1	0.77		LDA	0.700658	0.700658	0.62	0.84	0.74
9	Model	ROC Curve AUC	Precision/Recall AUC	Sensitivity	Specificity	Accuracy		Model	ROC Curve AUC	Precision/Recall AUC	Sensitivity	Specificity	Accuracy		Model	ROC Curve AUC	Precision/Recall AUC	Sensitivity	Specificity	Accuracy
	SVM	1	1	1	1	1		LDA	0.996711	0.996711	1	0.89	0.94		RF	1	1	1	1	1
	RF	1	1	0.94	1	0.97		KNN	0.967105	0.967105	0.75	1	0.89		ADB	1	1	1	0.95	0.97
	LDA	1	1	0.94	1	0.97		SVM	0.980263	0.980263	1	0.74	0.86		LR	0.996711	0.996711	1	0.95	0.97
	LR	0.986842	0.987171	0.88	1	0.94		GB	0.904605	0.904605	0.94	0.74	0.83		SVM	0.993421	0.993421	0.94	0.95	0.94
	ADB	0.963816	0.958116	0.94	0.84	0.89		NB	0.868421	0.868421	1	0.68	0.83		NB	0.970395	0.970395	1	0.89	0.94
	DTREE	0.879934	0.913393	0.81	0.95	0.89		RF	0.860197	0.860197	1	0.68	0.83		DTREE	0.916118	0.916118	0.94	0.89	0.91
	NB	0.963816	0.955972	1	0.68	0.83		ADB	0.868421	0.868421	1	0.63	0.8		LDA	0.927632	0.927632	0.94	0.84	0.89
	GB	0.958882	0.954914	0.75	0.89	0.83		LR	0.904605	0.904605	0.88	0.68	0.77		GB	0.935855	0.935855	0.94	0.79	0.86
	KNN	0.870066	0.869013	0.44	0.95	0.71		DTREE	0.764803	0.764803	0.69	0.84	0.77		KNN	0.993421	0.993421	0.62	1	0.83
10	Model	ROC Curve AUC	Precision/Recall AUC	Sensitivity	Specificity	Accuracy		Model	ROC Curve AUC	Precision/Recall AUC	Sensitivity	Specificity	Accuracy		Model	ROC Curve AUC	Precision/Recall AUC	Sensitivity	Specificity	Accuracy
	LDA	0.996711	0.996209	1	0.95	0.97		LDA	0.996711	0.996711	1	0.95	0.97		LR	1	1	1	1	1
	SVM	0.976974	0.966802	1	0.95	0.97		SVM	1	1	1	0.89	0.94		RF	1	1	0.94	1	0.97
	RF	0.980263	0.974827	0.88	0.95	0.91		RF	0.988487	0.988487	0.94	0.95	0.94		ADB	0.988487	0.988487	1	0.95	0.97
	LR	0.950658	0.953726	0.88	0.95	0.91		ADB	0.983553	0.983553	0.94	0.95	0.94		DTREE	0.973684	0.973684	1	0.95	0.97
	NB	0.947368	0.936261	1	0.79	0.89		GB	0.976974	0.976974	0.88	0.89	0.89		SVM	0.996711	0.996711	0.94	0.95	0.94
	GB	0.967105	0.961871	0.69	0.95	0.83		NB	0.950658	0.950658	0.94	0.84	0.89		LDA	0.996711	0.996711	0.94	0.95	0.94
	ADB	0.927632	0.879006	0.75	0.89	0.83		KNN	0.962171	0.962171	0.75	1	0.89		GB	0.993421	0.993421	0.94	0.89	0.91
	KNN	0.912829	0.93362	0.44	1	0.74		DTREE	0.889803	0.889803	0.94	0.84	0.89		KNN	0.985197	0.985197	0.69	1	0.86
	DTREE	0.728618	0.790341	0.56	0.89	0.74		LR	0.957237	0.957237	0.81	0.84	0.83		NB	0.881579	0.881579	1	0.79	0.89

## Sheet: Critical vs Non-critical COVID
	Machine Learning Round 1							Machine Learning Round 2							Machine Learning Round 3
1	Model	ROC Curve AUC	Precision/Recall AUC	Sensitivity	Specificity	Accuracy		Model	ROC Curve AUC	Precision/Recall AUC	Sensitivity	Specificity	Accuracy		Model	ROC Curve AUC	Precision/Recall AUC	Sensitivity	Specificity	Accuracy
	RF	0.88834	0.894	0.74	0.91	0.82		RF	0.850791	0.859439	0.78	0.86	0.82		GB	0.974308	0.97945	0.87	1	0.93
	GB	0.899209	0.9	0.7	0.91	0.8		LDA	0.909091	0.912235	0.7	0.86	0.78		LDA	0.970356	0.978898	0.91	0.95	0.93
	SVM	0.889328	0.898	0.74	0.86	0.8		SVM	0.863636	0.882593	0.74	0.86	0.8		SVM	0.968379	0.971296	0.91	0.91	0.91
	LR	0.847826	0.809	0.78	0.82	0.8		LR	0.857708	0.847982	0.74	0.86	0.8		ADB	0.962451	0.970927	0.87	0.95	0.91
	LDA	0.857708	0.836	0.7	0.86	0.78		GB	0.855731	0.830705	0.74	0.86	0.8		LR	0.976285	0.980019	0.87	0.91	0.89
	ADB	0.814229	0.744	0.78	0.82	0.8		ADB	0.826087	0.811493	0.78	0.77	0.78		KNN	0.976285	0.979405	0.87	0.91	0.89
	KNN	0.838933	0.789	0.65	0.86	0.76		NB	0.83004	0.805167	0.7	0.82	0.76		RF	0.976285	0.977566	0.87	0.91	0.89
	NB	0.794466	0.789	0.7	0.73	0.71		KNN	0.786561	0.757551	0.7	0.77	0.73		NB	0.927866	0.931594	0.87	0.86	0.87
	DTREE	0.646245	0.736	0.57	0.73	0.64		DTREE	0.623518	0.71872	0.57	0.68	0.62		DTREE	0.779644	0.846657	0.7	0.86	0.78
2	Model	ROC Curve AUC	Precision/Recall AUC	Sensitivity	Specificity	Accuracy		Model	ROC Curve AUC	Precision/Recall AUC	Sensitivity	Specificity	Accuracy		Model	ROC Curve AUC	Precision/Recall AUC	Sensitivity	Specificity	Accuracy
	GB	0.918972	0.895	0.83	0.91	0.87		RF	0.885375	0.901294	0.7	0.91	0.8		GB	0.983202	0.985751	0.87	1	0.93
	ADB	0.871541	0.864	0.83	0.82	0.82		GB	0.853755	0.872304	0.7	0.91	0.8		LDA	0.966403	0.974546	0.87	1	0.93
	SVM	0.867589	0.873	0.78	0.82	0.8		SVM	0.885375	0.909462	0.7	0.86	0.78		ADB	0.98419	0.985411	0.87	0.95	0.91
	RF	0.876482	0.858	0.7	0.86	0.78		LDA	0.865613	0.842896	0.74	0.86	0.8		RF	0.977273	0.978276	0.91	0.91	0.91
	LR	0.847826	0.79	0.74	0.82	0.78		KNN	0.879447	0.882014	0.65	0.91	0.78		SVM	0.966403	0.972023	0.91	0.91	0.91
	DTREE	0.77668	0.837	0.83	0.73	0.78		ADB	0.835968	0.863703	0.74	0.86	0.8		LR	0.964427	0.973647	0.87	0.91	0.89
	NB	0.796443	0.79	0.78	0.73	0.76		LR	0.843874	0.81074	0.7	0.86	0.78		KNN	0.958498	0.971611	0.87	0.91	0.89
	KNN	0.821146	0.75	0.7	0.82	0.76		NB	0.810277	0.812501	0.7	0.86	0.78		NB	0.923913	0.928822	0.87	0.77	0.82
	LDA	0.855731	0.822	0.57	0.82	0.69		DTREE	0.599802	0.708696	0.61	0.59	0.6		DTREE	0.801383	0.861232	0.74	0.86	0.8
3	Model	ROC Curve AUC	Precision/Recall AUC	Sensitivity	Specificity	Accuracy		Model	ROC Curve AUC	Precision/Recall AUC	Sensitivity	Specificity	Accuracy		Model	ROC Curve AUC	Precision/Recall AUC	Sensitivity	Specificity	Accuracy
	GB	0.903162	0.901	0.74	0.86	0.8		GB	0.891304	0.899707	0.7	0.91	0.8		GB	0.98419	0.986085	0.87	1	0.93
	SVM	0.885375	0.896	0.74	0.86	0.8		RF	0.83004	0.853008	0.57	0.91	0.73		LDA	0.970356	0.979548	0.87	1	0.93
	RF	0.881423	0.88	0.7	0.91	0.8		SVM	0.814229	0.851422	0.57	0.86	0.71		RF	0.980237	0.981028	0.91	0.91	0.91
	LR	0.853755	0.817	0.78	0.82	0.8		NB	0.780632	0.811379	0.7	0.77	0.73		ADB	0.972332	0.966376	0.87	0.95	0.91
	KNN	0.833004	0.81	0.65	0.86	0.76		DTREE	0.733202	0.805797	0.74	0.73	0.73		SVM	0.966403	0.970208	0.91	0.91	0.91
	LDA	0.851779	0.833	0.65	0.82	0.73		KNN	0.747036	0.814533	0.61	0.82	0.71		LR	0.966403	0.975031	0.87	0.91	0.89
	NB	0.802372	0.795	0.74	0.73	0.73		ADB	0.77668	0.804466	0.7	0.68	0.69		KNN	0.958498	0.971319	0.87	0.91	0.89
	ADB	0.816206	0.84	0.52	0.86	0.69		LR	0.794466	0.784532	0.61	0.73	0.67		NB	0.927866	0.931585	0.87	0.82	0.84
	DTREE	0.555336	0.676	0.57	0.55	0.56		LDA	0.788538	0.763539	0.52	0.73	0.62		DTREE	0.801383	0.861232	0.74	0.86	0.8
4	Model	ROC Curve AUC	Precision/Recall AUC	Sensitivity	Specificity	Accuracy		Model	ROC Curve AUC	Precision/Recall AUC	Sensitivity	Specificity	Accuracy		Model	ROC Curve AUC	Precision/Recall AUC	Sensitivity	Specificity	Accuracy
	GB	0.905138	0.88	0.74	0.95	0.84		GB	0.903162	0.903864	0.74	0.91	0.82		LDA	0.968379	0.977525	0.87	1	0.93
	SVM	0.879447	0.893	0.78	0.86	0.82		RF	0.902174	0.904826	0.74	0.91	0.82		ADB	0.980237	0.982467	0.87	0.95	0.91
	RF	0.885375	0.875	0.7	0.91	0.8		SVM	0.87747	0.857919	0.83	0.82	0.82		GB	0.978261	0.981403	0.87	0.95	0.91
	LR	0.84585	0.803	0.78	0.82	0.8		KNN	0.825099	0.822484	0.78	0.86	0.82		SVM	0.970356	0.973139	0.91	0.91	0.91
	LDA	0.865613	0.83	0.7	0.82	0.76		ADB	0.822134	0.784999	0.78	0.82	0.8		RF	0.976285	0.977237	0.87	0.91	0.89
	KNN	0.824111	0.805	0.7	0.82	0.76		LDA	0.84585	0.791617	0.74	0.82	0.78		LR	0.966403	0.975031	0.87	0.91	0.89
	NB	0.794466	0.788	0.7	0.73	0.71		LR	0.843874	0.798249	0.7	0.77	0.73		KNN	0.960474	0.972973	0.87	0.91	0.89
	ADB	0.772727	0.813	0.39	0.91	0.64		NB	0.794466	0.772572	0.7	0.77	0.73		NB	0.923913	0.928822	0.87	0.86	0.87
	DTREE	0.555336	0.676	0.57	0.55	0.56		DTREE	0.689723	0.772119	0.65	0.73	0.69		DTREE	0.801383	0.861232	0.74	0.86	0.8
5	Model	ROC Curve AUC	Precision/Recall AUC	Sensitivity	Specificity	Accuracy		Model	ROC Curve AUC	Precision/Recall AUC	Sensitivity	Specificity	Accuracy		Model	ROC Curve AUC	Precision/Recall AUC	Sensitivity	Specificity	Accuracy
	GB	0.893281	0.901	0.83	0.91	0.87		RF	0.862648	0.850816	0.83	0.86	0.84		GB	0.988142	0.989158	0.87	1	0.93
	SVM	0.899209	0.901	0.87	0.86	0.87		GB	0.881423	0.872209	0.7	0.91	0.8		ADB	0.972332	0.973289	0.91	0.95	0.93
	ADB	0.863636	0.891	0.7	0.86	0.78		LR	0.849802	0.800852	0.83	0.82	0.82		LDA	0.966403	0.974267	0.83	1	0.91
	LR	0.859684	0.812	0.78	0.82	0.8		DTREE	0.800395	0.855951	0.78	0.82	0.8		SVM	0.972332	0.975626	0.91	0.91	0.91
	RF	0.884387	0.892	0.7	0.82	0.76		SVM	0.883399	0.88934	0.7	0.82	0.76		RF	0.978261	0.978956	0.87	0.91	0.89
	LDA	0.863636	0.832	0.7	0.86	0.78		NB	0.812253	0.803317	0.78	0.82	0.8		LR	0.966403	0.975031	0.87	0.91	0.89
	DTREE	0.779644	0.847	0.7	0.86	0.78		LDA	0.855731	0.82383	0.65	0.86	0.76		KNN	0.960474	0.972973	0.87	0.91	0.89
	KNN	0.857708	0.809	0.7	0.82	0.76		ADB	0.754941	0.803289	0.7	0.82	0.76		NB	0.923913	0.928813	0.87	0.86	0.87
	NB	0.798419	0.792	0.74	0.73	0.73		KNN	0.838933	0.853278	0.61	0.82	0.71		DTREE	0.801383	0.861232	0.74	0.86	0.8
6	Model	ROC Curve AUC	Precision/Recall AUC	Sensitivity	Specificity	Accuracy		Model	ROC Curve AUC	Precision/Recall AUC	Sensitivity	Specificity	Accuracy		Model	ROC Curve AUC	Precision/Recall AUC	Sensitivity	Specificity	Accuracy
	GB	0.91502	0.928	0.74	0.91	0.82		RF	0.892292	0.902373	0.65	0.91	0.78		GB	0.982213	0.984589	0.87	1	0.93
	SVM	0.893281	0.897	0.83	0.82	0.82		GB	0.871541	0.83779	0.7	0.86	0.78		ADB	0.974308	0.982018	0.91	0.95	0.93
	RF	0.883399	0.885	0.74	0.86	0.8		LDA	0.86166	0.884271	0.61	0.91	0.76		RF	0.978261	0.979014	0.91	0.91	0.91
	ADB	0.863636	0.825	0.87	0.73	0.8		SVM	0.87747	0.879968	0.65	0.82	0.73		SVM	0.972332	0.975626	0.91	0.91	0.91
	KNN	0.831028	0.782	0.83	0.82	0.82		ADB	0.804348	0.832178	0.7	0.82	0.76		LDA	0.962451	0.971873	0.83	1	0.91
	LR	0.851779	0.791	0.78	0.82	0.8		KNN	0.815217	0.764059	0.65	0.86	0.76		LR	0.964427	0.973647	0.87	0.91	0.89
	LDA	0.86166	0.829	0.61	0.86	0.73		NB	0.822134	0.829488	0.61	0.82	0.71		KNN	0.960474	0.972973	0.87	0.91	0.89
	NB	0.806324	0.797	0.78	0.73	0.76		LR	0.826087	0.827921	0.57	0.82	0.69		NB	0.925889	0.929832	0.87	0.77	0.82
	DTREE	0.715415	0.812	0.52	0.91	0.71		DTREE	0.644269	0.741063	0.65	0.64	0.64		DTREE	0.801383	0.861232	0.74	0.86	0.8
7	Model	ROC Curve AUC	Precision/Recall AUC	Sensitivity	Specificity	Accuracy		Model	ROC Curve AUC	Precision/Recall AUC	Sensitivity	Specificity	Accuracy		Model	ROC Curve AUC	Precision/Recall AUC	Sensitivity	Specificity	Accuracy
	GB	0.881423	0.866	0.78	0.86	0.82		SVM	0.875494	0.891215	0.78	0.86	0.82		GB	0.982213	0.98527	0.91	1	0.96
	SVM	0.893281	0.9	0.74	0.86	0.8		KNN	0.873518	0.867776	0.78	0.82	0.8		LDA	0.972332	0.979368	0.91	1	0.96
	RF	0.864625	0.876	0.7	0.86	0.78		RF	0.858696	0.872739	0.74	0.86	0.8		RF	0.979249	0.979668	0.96	0.91	0.93
	LR	0.847826	0.815	0.78	0.82	0.8		LDA	0.885375	0.880357	0.65	0.86	0.76		ADB	0.982213	0.981735	0.87	0.95	0.91
	LDA	0.857708	0.849	0.65	0.86	0.76		NB	0.802372	0.789628	0.74	0.82	0.78		SVM	0.972332	0.975626	0.91	0.91	0.91
	KNN	0.846838	0.818	0.7	0.82	0.76		ADB	0.837945	0.810568	0.7	0.77	0.73		LR	0.978261	0.981403	0.87	0.91	0.89
	NB	0.796443	0.79	0.74	0.73	0.73		LR	0.83004	0.80815	0.65	0.82	0.73		KNN	0.978261	0.980636	0.87	0.91	0.89
	ADB	0.784585	0.791	0.78	0.64	0.71		GB	0.816206	0.745383	0.65	0.86	0.76		NB	0.925889	0.930575	0.87	0.86	0.87
	DTREE	0.577075	0.696	0.61	0.55	0.58		DTREE	0.555336	0.676328	0.57	0.55	0.56		DTREE	0.801383	0.861232	0.74	0.86	0.8
8	Model	ROC Curve AUC	Precision/Recall AUC	Sensitivity	Specificity	Accuracy		Model	ROC Curve AUC	Precision/Recall AUC	Sensitivity	Specificity	Accuracy		Model	ROC Curve AUC	Precision/Recall AUC	Sensitivity	Specificity	Accuracy
	GB	0.901186	0.907	0.74	0.91	0.82		RF	0.918972	0.89453	0.78	0.86	0.82		GB	0.988142	0.989733	0.91	1	0.96
	SVM	0.893281	0.899	0.74	0.86	0.8		GB	0.887352	0.843036	0.78	0.82	0.8		LDA	0.966403	0.976668	0.91	1	0.96
	ADB	0.873518	0.896	0.7	0.91	0.8		SVM	0.873518	0.890912	0.74	0.77	0.76		RF	0.972332	0.972737	0.91	0.91	0.91
	LR	0.837945	0.784	0.78	0.82	0.8		KNN	0.850791	0.859797	0.7	0.82	0.76		SVM	0.970356	0.973782	0.91	0.91	0.91
	LDA	0.847826	0.834	0.7	0.86	0.78		LR	0.841897	0.791979	0.74	0.82	0.78		ADB	0.954545	0.93113	0.87	0.95	0.91
	RF	0.879447	0.886	0.61	0.86	0.73		NB	0.814229	0.799652	0.74	0.82	0.78		LR	0.966403	0.975031	0.87	0.91	0.89
	DTREE	0.756917	0.826	0.7	0.82	0.76		LDA	0.84585	0.840378	0.61	0.77	0.69		KNN	0.960474	0.972973	0.87	0.91	0.89
	KNN	0.811265	0.787	0.65	0.82	0.73		ADB	0.752964	0.75657	0.83	0.64	0.73		NB	0.923913	0.929429	0.87	0.86	0.87
	NB	0.796443	0.79	0.7	0.73	0.71		DTREE	0.686759	0.780193	0.78	0.59	0.69		DTREE	0.801383	0.861232	0.74	0.86	0.8
9	Model	ROC Curve AUC	Precision/Recall AUC	Sensitivity	Specificity	Accuracy		Model	ROC Curve AUC	Precision/Recall AUC	Sensitivity	Specificity	Accuracy		Model	ROC Curve AUC	Precision/Recall AUC	Sensitivity	Specificity	Accuracy
	GB	0.909091	0.902	0.78	0.95	0.87		RF	0.882411	0.899253	0.65	0.91	0.78		GB	0.978261	0.981403	0.87	1	0.93
	SVM	0.901186	0.904	0.78	0.86	0.82		DTREE	0.802372	0.870048	0.7	0.91	0.8		ADB	0.980237	0.982996	0.91	0.95	0.93
	LR	0.847826	0.798	0.83	0.82	0.82		GB	0.883399	0.88927	0.61	0.91	0.76		LDA	0.966403	0.976028	0.83	1	0.91
	RF	0.894269	0.878	0.65	0.91	0.78		SVM	0.863636	0.885423	0.7	0.82	0.76		SVM	0.970356	0.973139	0.91	0.91	0.91
	ADB	0.891304	0.891	0.57	0.95	0.76		LR	0.849802	0.824114	0.74	0.82	0.78		LR	0.966403	0.975031	0.87	0.91	0.89
	LDA	0.859684	0.839	0.61	0.86	0.73		NB	0.820158	0.819306	0.7	0.86	0.78		KNN	0.960474	0.972973	0.87	0.91	0.89
	KNN	0.832016	0.781	0.65	0.82	0.73		KNN	0.79249	0.845428	0.7	0.82	0.76		RF	0.976285	0.977575	0.83	0.91	0.87
	NB	0.800395	0.791	0.7	0.73	0.71		LDA	0.849802	0.83266	0.61	0.86	0.73		NB	0.925889	0.92984	0.87	0.82	0.84
	DTREE	0.576087	0.703	0.65	0.5	0.58		ADB	0.847826	0.844133	0.57	0.82	0.69		DTREE	0.801383	0.861232	0.74	0.86	0.8
10	Model	ROC Curve AUC	Precision/Recall AUC	Sensitivity	Specificity	Accuracy		Model	ROC Curve AUC	Precision/Recall AUC	Sensitivity	Specificity	Accuracy		Model	ROC Curve AUC	Precision/Recall AUC	Sensitivity	Specificity	Accuracy
	GB	0.891304	0.916	0.78	0.86	0.82		RF	0.880435	0.894388	0.65	0.95	0.8		GB	0.98419	0.986367	0.87	1	0.93
	RF	0.876482	0.878	0.74	0.91	0.82		SVM	0.867589	0.879258	0.74	0.86	0.8		ADB	0.978261	0.978518	0.91	0.95	0.93
	SVM	0.891304	0.892	0.74	0.86	0.8		KNN	0.874506	0.890296	0.7	0.82	0.76		LDA	0.968379	0.977514	0.83	1	0.91
	LR	0.86166	0.815	0.74	0.82	0.78		LDA	0.857708	0.830727	0.74	0.82	0.78		SVM	0.970356	0.973782	0.91	0.91	0.91
	KNN	0.826087	0.793	0.74	0.82	0.78		GB	0.857708	0.871808	0.61	0.91	0.76		RF	0.977273	0.978311	0.87	0.91	0.89
	NB	0.798419	0.792	0.78	0.73	0.76		ADB	0.804348	0.801091	0.74	0.82	0.78		LR	0.964427	0.973647	0.87	0.91	0.89
	LDA	0.857708	0.825	0.61	0.82	0.71		LR	0.847826	0.820629	0.65	0.86	0.76		KNN	0.960474	0.972973	0.87	0.91	0.89
	ADB	0.778656	0.787	0.65	0.82	0.73		NB	0.794466	0.791767	0.65	0.73	0.69		NB	0.925889	0.930575	0.87	0.82	0.84
	DTREE	0.735178	0.81	0.65	0.82	0.73		DTREE	0.690711	0.772769	0.61	0.77	0.69		DTREE	0.801383	0.861232	0.74	0.86	0.8

## Sheet: COVID vs non-COVID ICU
	Machine Learning Round 1							Machine Learning Round 2							Machine Learning Round 3
1	Model	ROC Curve AUC	Precision/Recall AUC	Sensitivity	Specificity	Accuracy		Model	ROC Curve AUC	Precision/Recall AUC	Sensitivity	Specificity	Accuracy		Model	ROC Curve AUC	Precision/Recall AUC	Sensitivity	Specificity	Accuracy
	RF	0.921053	0.894113	0.89	0.88	0.89		RF	0.955108	0.966136	0.95	0.71	0.83		RF	1	1	0.95	1	0.97
	GB	0.931889	0.947763	0.84	0.88	0.86		SVM	0.947368	0.958548	0.89	0.76	0.83		LR	1	1	0.95	1	0.97
	DTREE	0.862229	0.907164	0.84	0.88	0.86		LDA	0.873065	0.908712	0.79	0.94	0.86		KNN	0.998452	0.998684	0.95	1	0.97
	SVM	0.904025	0.897484	0.79	0.82	0.81		GB	0.93808	0.948061	0.95	0.65	0.81		GB	0.996904	0.997299	0.95	1	0.97
	ADB	0.910217	0.853191	0.89	0.71	0.81		ADB	0.900929	0.918357	0.95	0.65	0.81		NB	0.981424	0.984945	0.89	1	0.94
	LDA	0.817337	0.867791	0.74	0.88	0.81		LR	0.863777	0.923036	0.84	0.71	0.78		LDA	0.95356	0.976428	0.89	1	0.94
	LR	0.80805	0.839858	0.79	0.82	0.81		KNN	0.839009	0.900689	0.58	1	0.78		DTREE	0.947368	0.975146	0.89	1	0.94
	KNN	0.849845	0.887266	0.53	0.94	0.72		DTREE	0.718266	0.807435	0.79	0.65	0.72		SVM	1	1	0.79	1	0.89
	NB	0.860681	0.882534	0.79	0.65	0.72		NB	0.829721	0.876885	0.95	0.29	0.64		ADB	0.972136	0.973541	0.79	0.94	0.86
2	Model	ROC Curve AUC	Precision/Recall AUC	Sensitivity	Specificity	Accuracy		Model	ROC Curve AUC	Precision/Recall AUC	Sensitivity	Specificity	Accuracy		Model	ROC Curve AUC	Precision/Recall AUC	Sensitivity	Specificity	Accuracy
	ADB	0.947368	0.934165	1	0.88	0.94		RF	0.934985	0.940128	0.84	0.82	0.83		ADB	1	1	1	1	1
	RF	0.950464	0.946671	0.95	0.88	0.92		ADB	0.863777	0.862701	0.84	0.88	0.86		LR	1	1	0.95	1	0.97
	SVM	0.959752	0.960382	0.89	0.88	0.89		SVM	0.916409	0.936374	0.79	0.82	0.81		RF	0.996904	0.997299	0.95	1	0.97
	GB	0.934985	0.91022	0.84	0.88	0.86		NB	0.910217	0.939738	0.89	0.71	0.81		KNN	0.995356	0.996411	0.95	1	0.97
	LR	0.876161	0.923706	0.74	0.94	0.83		GB	0.885449	0.884786	0.89	0.76	0.83		NB	0.98452	0.987792	0.89	1	0.94
	LDA	0.891641	0.932018	0.68	0.94	0.81		DTREE	0.829721	0.879908	0.89	0.76	0.83		LDA	0.95356	0.976428	0.89	1	0.94
	NB	0.904025	0.906806	0.95	0.65	0.81		KNN	0.869969	0.90928	0.58	0.94	0.75		SVM	1	1	0.79	1	0.89
	KNN	0.922601	0.925105	0.63	0.94	0.78		LR	0.826625	0.892603	0.79	0.71	0.75		GB	0.928793	0.957874	0.79	0.88	0.83
	DTREE	0.783282	0.858772	0.68	0.88	0.78		LDA	0.764706	0.856061	0.63	0.88	0.75		DTREE	0.835913	0.891469	0.79	0.88	0.83
3	Model	ROC Curve AUC	Precision/Recall AUC	Sensitivity	Specificity	Accuracy		Model	ROC Curve AUC	Precision/Recall AUC	Sensitivity	Specificity	Accuracy		Model	ROC Curve AUC	Precision/Recall AUC	Sensitivity	Specificity	Accuracy
	SVM	0.975232	0.976225	0.89	0.94	0.92		RF	0.924149	0.928738	0.89	0.82	0.86		LR	1	1	0.95	1	0.97
	RF	0.9613	0.958442	0.89	0.88	0.89		ADB	0.922601	0.896328	0.89	0.82	0.86		RF	0.996904	0.997299	0.95	1	0.97
	ADB	0.95356	0.962513	0.95	0.76	0.86		GB	0.876161	0.879608	0.89	0.82	0.86		ADB	0.996904	0.997299	0.95	1	0.97
	LR	0.885449	0.931196	0.79	0.94	0.86		LDA	0.879257	0.927717	0.74	0.94	0.83		KNN	0.998452	0.998684	0.84	1	0.92
	LDA	0.857585	0.905064	0.74	0.94	0.83		NB	0.894737	0.912954	0.95	0.71	0.83		NB	0.98452	0.98725	0.89	0.94	0.92
	KNN	0.885449	0.919134	0.68	0.94	0.81		DTREE	0.832817	0.883772	0.84	0.82	0.83		SVM	0.996904	0.997299	0.79	1	0.89
	DTREE	0.80031	0.86151	0.89	0.71	0.81		SVM	0.931889	0.940225	0.84	0.71	0.78		GB	0.934985	0.963393	0.89	0.94	0.92
	GB	0.860681	0.850104	0.84	0.71	0.78		LR	0.879257	0.914452	0.79	0.76	0.78		DTREE	0.865325	0.919042	0.79	0.94	0.86
	NB	0.916409	0.935805	0.95	0.47	0.72		KNN	0.873065	0.897783	0.63	0.82	0.72		LDA	0.837461	0.810257	0.89	0.82	0.86
4	Model	ROC Curve AUC	Precision/Recall AUC	Sensitivity	Specificity	Accuracy		Model	ROC Curve AUC	Precision/Recall AUC	Sensitivity	Specificity	Accuracy		Model	ROC Curve AUC	Precision/Recall AUC	Sensitivity	Specificity	Accuracy
	RF	0.975232	0.979528	0.95	0.76	0.86		SVM	0.941176	0.948841	0.84	0.82	0.83		LR	1	1	0.95	1	0.97
	LDA	0.907121	0.946044	0.74	1	0.86		LDA	0.873065	0.928343	0.74	0.94	0.83		ADB	1	1	0.95	1	0.97
	GB	0.928793	0.931961	0.89	0.82	0.86		ADB	0.866873	0.88124	0.89	0.76	0.83		RF	0.996904	0.997299	0.95	1	0.97
	ADB	0.919505	0.921814	1	0.71	0.86		RF	0.910217	0.925548	0.84	0.71	0.78		GB	0.993808	0.994862	0.95	1	0.97
	SVM	0.900929	0.90861	0.89	0.76	0.83		GB	0.904025	0.919926	0.89	0.65	0.78		NB	0.987616	0.989805	0.89	1	0.94
	KNN	0.899381	0.926815	0.63	1	0.81		KNN	0.886997	0.912035	0.63	0.88	0.75		KNN	0.996904	0.997494	0.84	1	0.92
	LR	0.839009	0.89223	0.79	0.65	0.72		DTREE	0.770898	0.844711	0.89	0.65	0.78		SVM	0.996904	0.997299	0.79	1	0.89
	DTREE	0.744582	0.826356	0.84	0.65	0.75		LR	0.832817	0.89071	0.74	0.71	0.72		LDA	0.925697	0.95036	0.95	0.88	0.92
	NB	0.79257	0.814423	0.95	0.47	0.72		NB	0.826625	0.849038	0.79	0.59	0.69		DTREE	0.917957	0.947368	0.89	0.94	0.92
5	Model	ROC Curve AUC	Precision/Recall AUC	Sensitivity	Specificity	Accuracy		Model	ROC Curve AUC	Precision/Recall AUC	Sensitivity	Specificity	Accuracy		Model	ROC Curve AUC	Precision/Recall AUC	Sensitivity	Specificity	Accuracy
	SVM	0.959752	0.968208	0.89	0.88	0.89		RF	0.964396	0.962779	0.95	0.94	0.94		LR	1	1	0.95	1	0.97
	GB	0.931889	0.935102	0.89	0.88	0.89		SVM	0.96904	0.971709	0.84	0.94	0.89		RF	1	1	0.95	1	0.97
	LR	0.904025	0.939944	0.84	0.88	0.86		GB	0.947368	0.949636	0.89	0.88	0.89		KNN	0.998452	0.998684	0.95	1	0.97
	RF	0.948916	0.953707	0.95	0.71	0.83		ADB	0.928793	0.914663	0.89	0.82	0.86		GB	0.993808	0.994862	0.95	1	0.97
	DTREE	0.862229	0.907164	0.84	0.88	0.86		NB	0.919505	0.941599	0.89	0.71	0.81		NB	0.990712	0.992015	0.89	1	0.94
	LDA	0.876161	0.927416	0.74	0.94	0.83		KNN	0.899381	0.929347	0.63	0.94	0.78		LDA	0.956656	0.977323	0.89	1	0.94
	ADB	0.904025	0.925118	0.95	0.65	0.81		LDA	0.820433	0.900412	0.68	0.94	0.81		DTREE	0.944272	0.961257	0.95	0.94	0.94
	KNN	0.894737	0.934576	0.58	1	0.78		LR	0.876161	0.926278	0.84	0.65	0.75		ADB	0.990712	0.992015	0.89	0.94	0.92
	NB	0.869969	0.889589	0.95	0.53	0.75		DTREE	0.695046	0.78655	0.68	0.71	0.69		SVM	0.996904	0.997299	0.79	1	0.89
6	Model	ROC Curve AUC	Precision/Recall AUC	Sensitivity	Specificity	Accuracy		Model	ROC Curve AUC	Precision/Recall AUC	Sensitivity	Specificity	Accuracy		Model	ROC Curve AUC	Precision/Recall AUC	Sensitivity	Specificity	Accuracy
	RF	0.993808	0.994862	0.79	1	0.89		SVM	0.944272	0.959724	0.84	0.94	0.89		LR	1	1	0.95	1	0.97
	GB	0.962848	0.955493	0.89	0.94	0.92		DTREE	0.888545	0.922515	0.89	0.88	0.89		RF	1	1	0.95	1	0.97
	SVM	0.987616	0.98946	0.79	1	0.89		ADB	0.876161	0.896259	0.84	0.88	0.86		ADB	1	1	0.89	1	0.94
	DTREE	0.921053	0.962719	0.84	1	0.92		RF	0.933437	0.929299	0.89	0.76	0.83		GB	1	1	0.89	1	0.94
	LR	0.863777	0.921965	0.79	1	0.89		GB	0.882353	0.86913	0.89	0.82	0.86		NB	0.98452	0.98725	0.89	1	0.94
	LDA	0.900929	0.950494	0.74	1	0.86		KNN	0.876161	0.91979	0.53	1	0.75		LDA	0.956656	0.977323	0.89	1	0.94
	ADB	0.922601	0.909807	0.84	0.88	0.86		LDA	0.80805	0.882681	0.53	0.94	0.72		KNN	0.998452	0.998684	0.84	1	0.92
	NB	0.894737	0.916619	0.79	0.71	0.75		LR	0.814241	0.872318	0.63	0.82	0.72		SVM	0.996904	0.997299	0.79	1	0.89
	KNN	0.868421	0.903205	0.47	1	0.72		NB	0.860681	0.907593	0.79	0.59	0.69		DTREE	0.865325	0.919042	0.79	0.94	0.86
7	Model	ROC Curve AUC	Precision/Recall AUC	Sensitivity	Specificity	Accuracy		Model	ROC Curve AUC	Precision/Recall AUC	Sensitivity	Specificity	Accuracy		Model	ROC Curve AUC	Precision/Recall AUC	Sensitivity	Specificity	Accuracy
	SVM	0.962848	0.955493	0.79	0.94	0.86		ADB	0.96904	0.963486	1	0.88	0.94		LR	1	1	0.95	1	0.97
	RF	0.956656	0.955797	0.84	0.88	0.86		SVM	0.956656	0.959733	0.84	0.94	0.89		ADB	1	1	0.95	1	0.97
	LDA	0.904025	0.947681	0.74	1	0.86		RF	0.944272	0.918857	0.89	0.88	0.89		KNN	0.996904	0.997494	0.95	1	0.97
	GB	0.950464	0.960451	0.79	0.82	0.81		GB	0.959752	0.95581	0.79	0.94	0.86		RF	0.996904	0.997299	0.95	1	0.97
	LR	0.869969	0.906025	0.74	0.88	0.81		NB	0.900929	0.918439	0.89	0.71	0.81		GB	0.993808	0.994862	0.95	0.94	0.94
	ADB	0.888545	0.891429	0.74	0.82	0.78		LDA	0.854489	0.909703	0.68	0.94	0.81		NB	0.978328	0.982932	0.89	1	0.94
	DTREE	0.786378	0.87455	0.63	0.94	0.78		DTREE	0.806502	0.866959	0.79	0.82	0.81		DTREE	0.944272	0.961257	0.95	0.94	0.94
	KNN	0.893189	0.913596	0.47	0.94	0.69		LR	0.845201	0.887206	0.79	0.76	0.78		SVM	1	1	0.79	1	0.89
	NB	0.857585	0.876793	0.89	0.53	0.72		KNN	0.854489	0.886782	0.53	0.94	0.72		LDA	0.857585	0.874921	0.74	0.76	0.75
8	Model	ROC Curve AUC	Precision/Recall AUC	Sensitivity	Specificity	Accuracy		Model	ROC Curve AUC	Precision/Recall AUC	Sensitivity	Specificity	Accuracy		Model	ROC Curve AUC	Precision/Recall AUC	Sensitivity	Specificity	Accuracy
	SVM	0.913313	0.920679	0.89	0.82	0.86		RF	0.97678	0.982562	0.95	0.88	0.92		ADB	1	1	0.95	1	0.97
	LDA	0.879257	0.923622	0.74	0.94	0.83		SVM	0.959752	0.968103	0.79	0.94	0.86		RF	0.990712	0.992652	0.95	1	0.97
	RF	0.899381	0.899574	0.95	0.71	0.83		LR	0.863777	0.92253	0.79	0.94	0.86		DTREE	0.973684	0.987573	0.95	1	0.97
	ADB	0.869969	0.907189	0.89	0.71	0.81		GB	0.96904	0.978704	0.95	0.65	0.81		GB	0.973684	0.987573	0.95	1	0.97
	LR	0.839009	0.897471	0.84	0.76	0.81		ADB	0.894737	0.903312	0.95	0.65	0.81		LR	0.996904	0.997299	0.95	0.94	0.94
	KNN	0.866873	0.906152	0.63	0.94	0.78		DTREE	0.826625	0.878877	0.95	0.71	0.83		KNN	0.996904	0.997494	0.84	1	0.92
	NB	0.860681	0.900754	0.89	0.59	0.75		NB	0.888545	0.913125	0.84	0.71	0.78		SVM	0.990712	0.992652	0.79	1	0.89
	DTREE	0.773994	0.843672	0.84	0.71	0.78		LDA	0.789474	0.874804	0.63	1	0.81		NB	0.978328	0.982227	0.89	0.88	0.89
	GB	0.783282	0.743966	0.84	0.65	0.75		KNN	0.871517	0.921418	0.47	1	0.72		LDA	0.897833	0.893332	0.89	0.82	0.86
9	Model	ROC Curve AUC	Precision/Recall AUC	Sensitivity	Specificity	Accuracy		Model	ROC Curve AUC	Precision/Recall AUC	Sensitivity	Specificity	Accuracy		Model	ROC Curve AUC	Precision/Recall AUC	Sensitivity	Specificity	Accuracy
	SVM	0.965944	0.975404	0.89	1	0.94		SVM	1	1	0.84	1	0.92		LR	1	1	0.95	1	0.97
	RF	0.978328	0.984258	0.89	0.94	0.92		GB	0.993808	0.994452	0.79	1	0.89		KNN	0.996904	0.997494	0.95	1	0.97
	GB	0.956656	0.969394	0.89	0.94	0.92		RF	0.98452	0.986451	0.84	0.94	0.89		RF	0.996904	0.997299	0.95	1	0.97
	ADB	0.981424	0.98595	0.79	1	0.89		ADB	0.873065	0.871149	0.89	0.88	0.89		ADB	1	1	0.89	1	0.94
	DTREE	0.888545	0.922515	0.89	0.88	0.89		LDA	0.854489	0.916714	0.68	1	0.83		NB	0.981424	0.984945	0.89	1	0.94
	LDA	0.894737	0.946638	0.74	1	0.86		DTREE	0.835913	0.891469	0.79	0.88	0.83		GB	0.967492	0.982094	0.95	0.94	0.94
	LR	0.879257	0.931331	0.79	0.88	0.83		LR	0.854489	0.91107	0.84	0.76	0.81		DTREE	0.944272	0.961257	0.95	0.94	0.94
	KNN	0.869969	0.913549	0.63	1	0.81		KNN	0.972136	0.983083	0.26	1	0.61		SVM	1	1	0.79	1	0.89
	NB	0.848297	0.886221	0.84	0.47	0.67		NB	0.832817	0.854348	0.79	0.59	0.69		LDA	0.888545	0.896607	0.84	0.88	0.86
10	Model	ROC Curve AUC	Precision/Recall AUC	Sensitivity	Specificity	Accuracy		Model	ROC Curve AUC	Precision/Recall AUC	Sensitivity	Specificity	Accuracy		Model	ROC Curve AUC	Precision/Recall AUC	Sensitivity	Specificity	Accuracy
	DTREE	0.911765	0.931818	1	0.82	0.92		GB	0.96904	0.97599	0.89	0.94	0.92		ADB	1	1	1	1	1
	RF	0.93808	0.933034	0.89	0.82	0.86		RF	0.965944	0.974435	0.95	0.88	0.92		LR	1	1	0.95	1	0.97
	SVM	0.950464	0.955452	0.79	0.88	0.83		SVM	0.962848	0.96999	0.95	0.88	0.92		RF	0.995356	0.996109	0.95	1	0.97
	GB	0.907121	0.875986	0.89	0.82	0.86		ADB	0.900929	0.897387	0.95	0.88	0.92		NB	0.987616	0.98946	0.89	1	0.94
	ADB	0.916409	0.919924	0.95	0.71	0.83		LDA	0.869969	0.906121	0.79	0.82	0.81		KNN	0.998452	0.998684	0.84	1	0.92
	LDA	0.869969	0.924709	0.74	0.94	0.83		KNN	0.907121	0.932749	0.68	0.88	0.78		LDA	0.950464	0.975586	0.89	1	0.94
	KNN	0.823529	0.881773	0.58	0.94	0.75		DTREE	0.812693	0.889724	0.68	0.94	0.81		SVM	0.996904	0.997299	0.79	1	0.89
	LR	0.835913	0.890237	0.74	0.71	0.72		NB	0.854489	0.884496	0.95	0.59	0.78		GB	0.93808	0.966009	0.79	0.94	0.86
	NB	0.798762	0.838153	0.89	0.41	0.67		LR	0.873065	0.917936	0.79	0.65	0.72		DTREE	0.865325	0.919042	0.79	0.94	0.86
