# Supplementary material for: Classification of COVID-19 Patients into Clinically Relevant Subsets by a Novel Machine Learning Pipeline Using Transcriptomic Features
Source: Int J Mol Sci. 2023 Mar 3;24(5):4905. doi: 10.3390/ijms24054905 (PMC10002748; doi:10.3390/ijms24054905)
Supplement: Supplementary file 1 [file ijms-24-04905-s001.zip › Table S3-Machine Learning Feature Importance.xlsx]

## Sheet: All COVID vs Healthy
	Machine Learning Round 1										Machine Learning Round 2										Machine Learning Round 3
		RF	DTREE	ADB	GB	SVM	Overall		Top 20 Features			RF	ADB	GB	SVM	NB	Overall		Top 10 Features			LR	RF	ADB	SVM	NB	Overall		Top 20 Genes
1	Cell Cycle	1	1	0.571429	1	0.8	4.37143		Alternative Complement Pathway		Cell Cycle	0.98499	0.625	1	0.105263	0.894737	3.60999		Amino Acid Metabolism		UQCRB	0.905476	0.548671	0.166667	0.911765	0.647059	3.17964		ASPM
	Glycolysis	0.607811	0.605591	0.571429	0.322642	0.542857	2.65033		Amino Acid Metabolism		Pentose Phosphate Signature	1	1	0.916788	0.157895	0.368421	3.4431		Apoptosis		COX7B	0.917933	0.81156	0.666667	0.0588235	0.573529	3.02851		C3
	Anti inflammation	0.374146	0	1	0.178481	0.885714	2.43834		Anergic / Activated T cells		Amino Acid Metabolism	0.170105	0	0.013326	0.894737	1	2.07817		Cell Cycle		CCNB2	1	0.324867	0.5	0.441176	0.75	3.01604		CCNB2
	Alternative Complement Pathway	0.417125	0.335992	0.285714	0.273094	0.485714	1.79764		Anti inflammation		Glycolysis	0.529878	0.375	0.273003	0.631579	0.263158	2.07262		Classical Complement Pathway		SLC2A3	0.434037	0.611062	1	0.117647	0.264706	2.42745		CD177
	Pentose Phosphate Signature	0.259526	0.112921	0.857143	0.300597	0.2	1.73019		Apoptosis		Apoptosis	0.0913519	0	0.044527	0.947368	0.947368	2.03062		Glycolysis		COX6C	0.597503	1	0.166667	0.0294118	0.558824	2.35241		CEP55
	IFN	0.0948286	0	0.285714	0.138268	0.971429	1.49024		CD40 Activated B Cell		Oxidative Phosphorylation	0.12059	1	0.166488	0.578947	0.157895	2.02392		Granulocyte		CLC	0.797286	0.088001	0.333333	0.220588	0.882353	2.32156		CLC
	Classical Complement Pathway	0.11378	0.367991	0.142857	0.0975336	0.742857	1.46502		Cell Cycle		Proinflammatory IL-1 Family	0.178013	0.25	0.202092	0.842105	0.473684	1.94589		Oxidative Phosphorylation		NDUFAF7	0.338442	0.0877614	1	0.485294	0.294118	2.20562		COX6C
	Anergic / Activated T cells	0.057126	0	0.285714	0.000634775	0.914286	1.25776		Classical Complement Pathway		Classical Complement Pathway	0.1952	0.125	0.28486	0.736842	0.578947	1.92085		Pentose Phosphate Signature		TMEM126B	0.450743	0.116866	0.166667	0.970588	0.411765	2.11663		COX7B
	Inflammatory_Neutrophil	0.116566	0	0	0.0620467	1	1.17861		Dendritic Cell		Granulocyte	0.186604	0.5	0	0.684211	0.526316	1.89713		Proinflammatory IL-1 Family		C3	0.118736	0.0440384	0.5	0.926471	0.367647	1.95689		COX7C
	Oxidative Phosphorylation	0.119975	0	0.428571	0.133802	0.457143	1.13949		Glycolysis		TCA cycle	0.0909918	0.125	0.10155	0.789474	0.789474	1.89649		TCA cycle		HAAO	0.150566	0.065162	0.333333	0.661765	0.720588	1.93141		CXCR2
	Amino Acid Metabolism	0.0495528	0	0.142857	0.00251889	0.942857	1.13779		Granulocyte		Alternative Complement Pathway	0.55318	0.375	0.162029	0.0526316	0.736842	1.87968				IL1R1	0.153567	0.0103808	0	0.808824	0.955882	1.92865		DNAJC15
	Apoptosis	0.0578247	0	0.142857	0.00729144	0.857143	1.06512		IFN		CD40 Activated B Cell	0.462887	0.25	0.0689844	0.526316	0.421053	1.72924				CXCR2	0.110243	0.036454	0	0.955882	0.823529	1.92611		HAAO
	CD40 Activated B Cell	0.206011	0	0	0.0281323	0.828571	1.06272		Inflammatory_Neutrophil		Inflammatory_Neutrophil	0.299044	0.25	6.83945e-05	1	0.105263	1.65438				COX7C	0.503674	0.545936	0.166667	0.0735294	0.588235	1.87804		HLA-DPB1
	Granulocyte	0.209108	0	0.285714	3.16796e-06	0.514286	1.00911		MHC II		Anti inflammation	0.535434	0.375	0.0487543	0.421053	0.210526	1.59077				NDUFB3	0.456536	0.296666	0.5	0.279412	0.308824	1.84144		IL1R1
	MHC II	0.268477	0	0.571429	0.0995941	0.0285714	0.968071		Oxidative Phosphorylation		MHC II	0.171644	0.25	0.00516266	0.210526	0.842105	1.47944				ASPM	0.0381499	0.0873775	0	0.985294	0.705882	1.8167		NDUFAF7
	Dendritic Cell	0.140116	0	0.142857	0.00103131	0.657143	0.941147		Pentose Phosphate Signature		Dendritic Cell	0.0616205	0.25	0.0108448	0.368421	0.631579	1.32247				CD177	0.641378	0.145112	0.5	0.426471	0.102941	1.8159		NDUFB3
	Proinflammatory IL-1 Family	0.152069	0	0.142857	0.17678	0.342857	0.814563		Proinflammatory IL-1 Family		IFN	0.264438	0.125	0.0895899	0	0.684211	1.16324				OSM	0.250015	0.0358581	0.166667	1	0.352941	1.80548		OSM
	Tactivated	0.0414451	0	0	6.45798e-05	0.771429	0.812938		Tactivated		Tactivated	0.118836	0.25	0.0277259	0.473684	0	0.870246				CEP55	0.590201	0.216522	0.166667	0.352941	0.470588	1.79692		SLC2A3
	TCA cycle	0.0801599	0.0778959	0.428571	0.0123411	0.171429	0.770397		TCA cycle		Treg	0	0.125	0.0285727	0.315789	0.315789	0.785152				HLA-DPB1	0.100072	0.014827	0	0.691176	0.970588	1.77666		TMEM126B
	Treg	0.0292847	0.0403389	0	5.00117e-05	0.685714	0.755388		Treg		Anergic / Activated T cells	0.0772555	0	0.000170311	0.263158	0.0526316	0.393215				DNAJC15	0.150821	0.0179964	0	0.941176	0.661765	1.77176		UQCRB
	Cytotoxic, Activated T Cell	0.0311625	0	0	5.09237e-05	0.714286	0.745499					RF	ADB	GB	SVM	NB	Overall		Top 10 Features		CR1	0.296861	0.00634081	0	0.852941	0.602941	1.75908
	Plasma Cell	0.416934	0	0	0.0621406	0.257143	0.736217				Pentose Phosphate Signature	0.983045	1	1	0.842105	0.526316	4.35147		Alternative Complement Pathway		TKTL1	0.284067	0.00557651	0	0.838235	0.617647	1.74553
	Fatty Acid Alpha Oxidation	0.106445	0	0	0.00138281	0.6	0.707828				Cell Cycle	1	1	0.967516	0.578947	0.684211	4.23067		Anti inflammation		GINS2	0.360975	0.00360223	0	0.588235	0.779412	1.73222
	Erythrocytes	0.0713365	0	0	7.76989e-05	0.628571	0.699986				pDC	0.0112663	0.833333	0.0273328	0.947368	0.894737	2.71404		Cell Cycle		E2F3	0.268279	0.00201674	0	0.573529	0.794118	1.63794
	Unfolded Protein	0.0821734	0	0.285714	0.018022	0.285714	0.671624				Oxidative Phosphorylation	0.0255629	0.5	0.243503	0.894737	0.947368	2.61117		Erythrocytes		SLC2A5	0.0419704	0.00630467	0	0.75	0.838235	1.63651
	Fatty Acid Beta Oxidation	0.0239243	0	0	0.015224	0.571429	0.610577				Glycolysis	0.651908	0.166667	0.422911	0.526316	0.842105	2.60991		Glycolysis		NDUFAF5	0.501983	0.145467	0.5	0.205882	0.279412	1.63274
	T Cell	0.0363455	0	0.142857	3.01167e-07	0.4	0.579203				Anti inflammation	0.485791	0.5	0.166914	0.684211	0.631579	2.46849		Inflammatory_Neutrophil		SLC2A4	0.0224068	0.00879629	0	0.897059	0.691176	1.61944
	pDC	0.0609747	0	0.285714	3.09872e-05	0.228571	0.575291				Alternative Complement Pathway	0.277213	0.333333	0.076525	1	0.736842	2.42391		Oxidative Phosphorylation		CTSS	0.164423	0.00266067	0	0.529412	0.867647	1.56414
	ROS Protection	0	0	0.142857	0.00296033	0.371429	0.517246				T Cell	0.385195	0.666667	0.254251	0.315789	0.315789	1.93769		pDC		NDUFA2	0.247956	0.0159571	0.166667	0.176471	0.941176	1.54823
	Platelets	0.173195	0	0	0.00233499	0.314286	0.489816				Inflammatory_Neutrophil	0.152221	0.333333	0.00215043	0.631579	0.578947	1.69823		Pentose Phosphate Signature		PGD	0.231323	0.0128905	0	0.382353	0.897059	1.52363
	NK Cell	0.0675665	0.160176	0	0.125733	0.114286	0.467761				Erythrocytes	0.0112301	0.5	0.0107034	0.789474	0.368421	1.67983		T Cell		NDUFA5	0.352123	0.0398279	0	0.191176	0.926471	1.5096
	LDG	0.0261481	0	0	0.0018656	0.428571	0.456585				Granulocyte	0.243328	0.5	0.00356231	0.473684	0.263158	1.48373				HLA-DRB1	0.202644	0.00366309	0	0.867647	0.397059	1.47101
	NFkB Complex	0.133932	0	0	0.000496489	0.0857143	0.220143				Apoptosis	0.0358587	0	0.00664255	0.368421	1	1.41092				CCNB1	0.422606	0.177733	0	0.544118	0.323529	1.46799
	NLRP3 Inflammasome	0.0137972	0	0	0.0365774	0.142857	0.193232				CD40 Activated B Cell	0.420853	0.166667	0.187515	0.421053	0.210526	1.40661				TRAP1	0.247842	0.0119342	0.333333	0.705882	0.161765	1.46076
	Monocyte	0.0272579	0	0	0	0.0571429	0.0844007				IFN	0.103807	0.166667	0.07369	0.736842	0.157895	1.2389				PRPS2	0.121262	0.000367482	0	0.323529	1	1.44516
	TNF	0.0178921	0	0	4.19124e-06	0	0.0178963				Anergic / Activated T cells	0	0.166667	0	0.263158	0.789474	1.2193				PFKFB2	0.326586	0.00580462	0	0.338235	0.764706	1.43533
2		RF	ADB	GB	SVM	NB	Overall		Top 20 Features		Amino Acid Metabolism	0.160655	0	0.215879	0.210526	0.473684	1.06074				RETN	0.278067	0.00532095	0	0.411765	0.735294	1.43045
	Cell Cycle	1	1	0.224538	0.8	0.885714	3.91025		Alternative Complement Pathway		Plasma Cell	0.392997	0.166667	0.260292	0.157895	0	0.97785				PFKFB3	0.139987	0.00889787	0	0.367647	0.911765	1.4283
	Pentose Phosphate Signature	0.775793	0.75	1	0.257143	0.314286	3.09722		Amino Acid Metabolism		MHC II	0.092408	0.666667	0.0991641	0	0.0526316	0.91087				CFH	0.00569515	0.0162779	0.166667	0.735294	0.485294	1.40923
	Inflammatory_Neutrophil	0.14261	0.25	2.75359e-05	1	0.914286	2.30692		Anergic / Activated T cells		Classical Complement Pathway	0.0513985	0.5	0.118167	0.0526316	0.105263	0.82746				CYCS	0.00651142	0.00992102	0	0.558824	0.808824	1.38408
	Anti inflammation	0.377521	0.625	0.0356518	0.885714	0.228571	2.15246		Anti inflammation		Dendritic Cell	0.0278488	0.166667	0.0202124	0.105263	0.421053	0.741044				CDC20	0.670865	0.0315843	0	0.617647	0.0294118	1.34951
	Amino Acid Metabolism	0.175557	0	0.0894596	0.942857	0.828571	2.03645		Apoptosis			RF	ADB	GB	SVM	NB	Overall		Top 10 Features		VSIG4	0.219682	0.0363201	0	0.102941	0.985294	1.34424
	Classical Complement Pathway	0.117884	0.125	0.046651	0.742857	0.971429	2.00382		CD40 Activated B Cell		Cell Cycle	1	0.833333	0.921088	0.421053	0.894737	4.07021		Alternative Complement Pathway		PTTG1	0.46144	0.00644004	0	0.455882	0.382353	1.30612
	Apoptosis	0.0575306	0.125	0.000142179	0.857143	0.942857	1.98267		Cell Cycle		Pentose Phosphate Signature	0.792357	0.5	1	0.894737	0	3.18709		Amino Acid Metabolism		MKI67	0.587118	0.0988333	0.333333	0.0441176	0.235294	1.2987
	T Cell	0.145027	0.125	0.0217963	0.771429	0.8	1.86325		Classical Complement Pathway		Anti inflammation	0.46093	1	0.122249	0.263158	0.684211	2.53055		Anti inflammation		SLC27A2	0.0146598	0	0	0.647059	0.632353	1.29407
	IFN	0.0710633	0.25	0.00431243	0.971429	0.542857	1.83966		Dendritic Cell		Platelets	0.336558	0.333333	0.0417534	0.789474	0.789474	2.29059		Apoptosis		NDUFS1	0.183367	0.0913531	0.333333	0.308824	0.338235	1.25511
	CD40 Activated B Cell	0.178374	0	0.281346	0.828571	0.428571	1.71686		Erythrocytes		Glycolysis	0.635412	0.5	0.378067	0.684211	0.0526316	2.25032		Cell Cycle		IL1B	0.271021	0.0420509	0	0.779412	0.147059	1.23954
	Plasma Cell	0.478996	0.125	0.197094	0.314286	0.571429	1.6868		Glycolysis		MHC II	0.264462	0.5	0.207387	0.631579	0.578947	2.18238		Glycolysis		SOCS3	0.102437	0.0953009	0	0.161765	0.852941	1.21244
	Oxidative Phosphorylation	0.0447986	0.25	0.274765	0.228571	0.857143	1.65528		Granulocyte		Amino Acid Metabolism	0.135029	0	0.0870958	0.947368	0.842105	2.0116		MHC II		COX11	0.104641	0.00676519	0	0.514706	0.529412	1.15552
	Glycolysis	0.460489	0.125	0.116196	0.542857	0.342857	1.5874		IFN		Oxidative Phosphorylation	0.263975	0.333333	0.0123939	0.736842	0.631579	1.97812		Oxidative Phosphorylation		MCM10	0.47067	0.00607919	0	0.470588	0.205882	1.15322
	Alternative Complement Pathway	0.284586	0.5	0.0089729	0.485714	0.257143	1.53642		Inflammatory_Neutrophil		Alternative Complement Pathway	0.277673	0.666667	0.343028	0.473684	0.210526	1.97158		Pentose Phosphate Signature		HLA-DQA1	0	0.00401858	0	0.720588	0.426471	1.15108
	Anergic / Activated T cells	0.0206434	0	6.96421e-07	0.914286	0.6	1.53493		MHC II		Apoptosis	0.0668142	0.5	0.0230039	1	0.368421	1.95824		Platelets		IL1RAP	0.0611371	0.0142224	0	0.882353	0.176471	1.13418
	Granulocyte	0.146909	0.125	1.12543e-07	0.514286	0.714286	1.50048		Oxidative Phosphorylation		Fatty Acid Alpha Oxidation	0.123373	0.166667	0.0741108	0.578947	1	1.9431				IL18RAP	0.103024	0.0141007	0	0.823529	0.132353	1.07301
	Dendritic Cell	0.016449	0	0.0141831	0.657143	0.771429	1.4592		pDC		Tactivated	0.017422	0.333333	0	0.842105	0.526316	1.71918				HLA-DMA	0.297303	0.0190429	0	0.676471	0.0441176	1.03693
	MHC II	0.216392	0.375	0.0634689	0.0285714	0.628571	1.312		Pentose Phosphate Signature		Inflammatory_Neutrophil	0.281499	0.166667	0.0172034	0.210526	0.947368	1.62326				BRCA1	0.173573	0.00129374	0	0.632353	0.220588	1.02781
	pDC	0.08371	0	0.0070904	0.2	1	1.2908		Plasma Cell		TNF	0.0774295	0.666667	0.20806	0.315789	0.315789	1.58374				PKM	0.0781038	0.0160284	0	0.397059	0.5	0.991191
	Erythrocytes	0.115396	0.375	8.87117e-05	0.628571	0.142857	1.26191		T Cell		Plasma Cell	0.294416	0.166667	0.012554	0	0.736842	1.21048				H6PD	0.167069	0.0149578	0	0.794118	0.0147059	0.99085
	Cytotoxic, Activated T Cell	0.0186188	0	0.0112643	0.714286	0.485714	1.22988				T Cell	0.190427	0.5	0.177856	0.157895	0.157895	1.18407				SLC2A1	0.274221	0.0154318	0	0.602941	0.0882353	0.98083
	Platelets	0.156848	0.125	0.00104396	0.342857	0.514286	1.14003				Anergic / Activated T cells	0.0572504	0.333333	0.00048462	0.368421	0.421053	1.18054				IL18R1	0.0443774	0.0336969	0	0.764706	0.117647	0.960427
	LDG	0.0472152	0	0.000414451	0.428571	0.657143	1.13334				CD40 Activated B Cell	0.300179	0.166667	0.0347599	0.0526316	0.473684	1.02792				COA1	0.154971	0.00147851	0	0.25	0.514706	0.921155
	Treg	0.0318697	0	0	0.285714	0.742857	1.06044				Dendritic Cell	0	0.166667	0.0438969	0.526316	0.263158	1.00004				COX20	0.105329	0.00241373	0	0.132353	0.544118	0.784214
	Proinflammatory IL-1 Family	0.166689	0	0.0639955	0.371429	0.457143	1.05926				Cytotoxic, Activated T Cell	0.066832	0.5	0.00782168	0.105263	0.105263	0.78518				TTC19	0.0103305	0.00579089	0	0.0882353	0.676471	0.780827
	NFkB Complex	0.0944615	0.125	0.0112404	0.114286	0.685714	1.0307					RF	ADB	LDA	GB	SVM	Overall		Top 10 Features		IL1RN	0.0656383	0.0212325	0	0.5	0.191176	0.778047
	Fatty Acid Alpha Oxidation	0.0868711	0	0.00604454	0.6	0.285714	0.97863				Pentose Phosphate Signature	1	0.444444	1	1	0.789474	4.23392		Alternative Complement Pathway		C5	0.0489749	0.00467041	0	0.264706	0.455882	0.774234
	ROS Protection	0.0768832	0.125	0.0806443	0.4	0.2	0.882528				Cell Cycle	0.902475	1	0.709084	0.622959	0.368421	3.60294		Anti inflammation		AURKA	0.240465	0.00222149	0	0	0.441176	0.683863
	Fatty Acid Beta Oxidation	0.014044	0.125	0.00176327	0.571429	0.0571429	0.769379				Anti inflammation	0.681602	0.777778	0.430996	0.264212	0.157895	2.31248		CD40 Activated B Cell		TYMS	0.096385	0.00221727	0	0.235294	0.25	0.583896
	TNF	0.021734	0	0.00350215	0.685714	0	0.71095				Alternative Complement Pathway	0.173488	0.555556	0.453928	0.0820496	1	2.26502		Cell Cycle		MCM2	0.231856	0.0234055	0.166667	0.0147059	0.0735294	0.510163
	TCA cycle	0.0824508	0.5	0.0138468	0	0.0857143	0.682012				Glycolysis	0.60269	0.333333	0.379363	0.138602	0.578947	2.03294		Fatty Acid Alpha Oxidation		NDUFB6	0.0437202	0.00403058	0	0.294118	0.0588235	0.400692
	NLRP3 Inflammasome	0.0259863	0	0.000428631	0.457143	0.114286	0.597844				TCA cycle	0.0518589	0.555556	0.443649	0.0923862	0.684211	1.82766		Glycolysis		SLC25A4	0.0216658	0.00988446	0	0.147059	0	0.178609
	Tactivated	0	0	0.00159778	0.0857143	0.371429	0.458741				CD40 Activated B Cell	0.441991	0.111111	0.303805	0.211118	0.631579	1.6996		Granulocyte			LR	RF	ADB	SVM	NB	Overall		Top 20 Genes
	Monocyte	0.000429869	0	1.1121e-06	0.0571429	0.4	0.457574				Granulocyte	0.187166	0.333333	0.195448	0.0109825	0.894737	1.62167		Pentose Phosphate Signature		COX6C	0.616893	1	0.125	0.852941	0.882353	3.47719		CCNB1
	Unfolded Protein	0.0754843	0	0.000331781	0.171429	0.171429	0.418673				Proinflammatory IL-1 Family	0.123655	0.111111	0.388453	0.16219	0.736842	1.52225		Proinflammatory IL-1 Family		COX7B	0.908742	0.726148	0.375	0.897059	0.0882353	2.99518		CCNB2
	NK Cell	0.0772147	0.125	0.00393166	0.142857	0.0285714	0.377575				Fatty Acid Alpha Oxidation	0.0525357	0.111111	0.298532	0.00662028	0.947368	1.41617		TCA cycle		SLC2A3	0.411266	0.528116	0.625	0.764706	0.294118	2.62321		CDC20
3		RF	ADB	GB	SVM	NB	Overall		Top 20 Features		pDC	0.140788	0.111111	0	0	0.842105	1.094				NDUFAF7	0.334243	0.0873885	1	0.0588235	1	2.48045		CEP55
	Cell Cycle	1	0.8	0.236274	0.8	0.6	3.43627		Alternative Complement Pathway		MHC II	0.201459	0.333333	0.137014	0.0915927	0.315789	1.07919				MKI67	0.702767	0.216097	0.125	0.926471	0.470588	2.44092		CLC
	Pentose Phosphate Signature	0.830847	1	1	0.2	0.314286	3.34513		Amino Acid Metabolism		NK Cell	0.172911	0.111111	0.00550871	0.278055	0.473684	1.04127				NDUFB3	0.489678	0.264172	0.625	0.75	0.264706	2.39356		COA1
	Anti inflammation	0.301497	0.8	0.0822012	0.885714	0.828571	2.89798		Anergic / Activated T cells		Unfolded Protein	0.0743061	0.222222	0.427526	0.0223439	0.210526	0.956925				HLA-DMA	0.248788	0	0.125	0.985294	0.970588	2.32967		COX11
	Apoptosis	0.183039	0.4	0.00300064	0.857143	0.914286	2.35747		Anti inflammation		NFkB Complex	0.149481	0	0.130782	0.0441985	0.526316	0.850778				CCNB2	1	0.257514	0.25	0.441176	0.352941	2.30163		COX6C
	Dendritic Cell	0.0481203	0.4	0.00120734	0.657143	0.942857	2.04933		Apoptosis		IFN	0.11904	0.111111	0.0930355	0.147762	0.263158	0.734106				CDC20	0.792797	0.048264	0.125	0.529412	0.794118	2.28959		COX7B
	Oxidative Phosphorylation	0.0763338	0.4	0.321824	0.457143	0.685714	1.94101		CD40 Activated B Cell		Plasma Cell	0.440084	0.111111	0.119848	0.0298401	0	0.700884				PTTG1	0.516898	0.00666195	0	0.867647	0.897059	2.28827		CTSS
	MHC II	0.0841951	0.8	0.00518259	0.0285714	1	1.91795		Cell Cycle		Erythrocytes	0.0246898	0.111111	0.0560103	0.0325518	0.421053	0.645416				CTSS	0.131496	0.00283051	0	0.955882	0.955882	2.04609		HLA-DMA
	Glycolysis	0.473599	0.2	0.0677702	0.542857	0.628571	1.9128		Cytotoxic, Activated T Cell		ROS Protection	0	0.111111	0.241694	0.00455214	0.105263	0.46262				CLC	0.813122	0.0954373	0.125	0.367647	0.544118	1.94532		MKI67
	Inflammatory_Neutrophil	0.147398	0.2	0.000394272	1	0.485714	1.83351		Dendritic Cell		Anergic / Activated T cells	0.0743289	0	0.249613	0.0156889	0.0526316	0.392263				CCNB1	0.442737	0.248424	0	0.426471	0.779412	1.89704		NDUFA2
	Tactivated	0.0798262	0.2	0.00428309	0.771429	0.742857	1.7984		Fatty Acid Alpha Oxidation			RF	ADB	GB	SVM	NB	Overall		Top 10 Features		CEP55	0.639792	0.194549	0.25	0.176471	0.602941	1.86375		NDUFAF7
	Fatty Acid Alpha Oxidation	0.131589	0.2	0.00311583	0.6	0.857143	1.79185		Glycolysis		Anti inflammation	0.596162	1	0.00767189	0.947368	0.947368	3.49857		Alternative Complement Pathway		OSM	0.274062	0.0365905	0.375	0.632353	0.529412	1.84742		NDUFB3
	Amino Acid Metabolism	0.195653	0	0.183917	0.942857	0.428571	1.751		Inflammatory_Neutrophil		Cell Cycle	1	0.625	0.47147	0.368421	0.789474	3.25436		Amino Acid Metabolism		UQCRB	0.962802	0.44692	0	0.117647	0.25	1.77737		OSM
	Alternative Complement Pathway	0.333579	0.6	0.0396905	0	0.771429	1.7447		MHC II		Pentose Phosphate Signature	0.906976	0.625	1	0.157895	0.157895	2.84777		Anergic / Activated T cells		NDUFA2	0.255578	0.018561	0.125	0.720588	0.617647	1.73737		PTTG1
	Platelets	0.246469	0.2	0.000616997	0.314286	0.885714	1.64709		Oxidative Phosphorylation		Alternative Complement Pathway	0.446959	0.5	0.0233827	1	0.736842	2.70718		Anti inflammation		TMEM126B	0.423672	0.0829701	0	0.514706	0.676471	1.69782		SLC2A3
	CD40 Activated B Cell	0.277404	0	0.0231137	0.828571	0.457143	1.58623		Pentose Phosphate Signature		Proinflammatory IL-1 Family	0.43623	0.375	0.29682	0.842105	0.473684	2.42384		CD40 Activated B Cell		COX11	0.14582	0.006055	0	0.676471	0.867647	1.69599		TMEM126B
	T Cell	0.110437	0.4	0.0571957	0.4	0.571429	1.53906		Plasma Cell		CD40 Activated B Cell	0.394611	0	0.267666	0.736842	0.894737	2.29386		Cell Cycle		COA1	0.171439	0.0382432	0	0.661765	0.823529	1.69498		UQCRB
	Anergic / Activated T cells	0.0797628	0.4	0	0.914286	0.142857	1.53691		Platelets		Granulocyte	0.445918	0.5	0.000323453	0.421053	0.631579	1.99887		Glycolysis		NDUFAF5	0.505328	0.103491	0.125	0.235294	0.691176	1.66029
	Plasma Cell	0.345975	0	0.281569	0.257143	0.514286	1.39897		T Cell		Glycolysis	0.710378	0.25	0.0491507	0.684211	0.210526	1.90427		Granulocyte		NDUFA5	0.421311	0.0100974	0	0.470588	0.75	1.652
	TNF	0.0572541	0	0.000787437	0.485714	0.8	1.34376		Tactivated		Amino Acid Metabolism	0.326124	0.25	0.00119008	0.210526	1	1.78784		Pentose Phosphate Signature		GINS2	0.38844	0.00591617	0	0.308824	0.926471	1.62965
	Cytotoxic, Activated T Cell	0.0527528	0.2	0.000786156	0.714286	0.342857	1.31068		TNF		Anergic / Activated T cells	0.117078	0.125	3.80488e-05	0.631579	0.684211	1.55791		Proinflammatory IL-1 Family		TYMS	0.0602998	0	0	0.911765	0.647059	1.61912
	Fatty Acid Beta Oxidation	0.0493016	0	0.00911174	0.571429	0.657143	1.28698				Dendritic Cell	0.0393693	0.125	0	0.894737	0.421053	1.48016				COX7C	0.553239	0.434466	0.375	0.0441177	0.191176	1.598
	Granulocyte	0.295597	0.2	0.000105342	0.514286	0.228571	1.23856				Inflammatory_Neutrophil	0.0980886	0.125	0.000224836	0.263158	0.842105	1.32858				ASPM	0.00863349	0.0536604	0	1	0.5	1.56229
	Erythrocytes	0.0665645	0	0.000140151	0.628571	0.542857	1.23813				TCA cycle	0.0487598	0.125	0.305264	0.789474	0	1.2685				COX20	0.0583446	0.00738659	0	0.823529	0.661765	1.55103
	Proinflammatory IL-1 Family	0.306145	0.4	0.125796	0.342857	0.0571429	1.23194				Oxidative Phosphorylation	0.03221	0.125	0.00154145	0.578947	0.526316	1.26401				TRAP1	0.277391	0.00713534	0.25	0.602941	0.411765	1.54923
	LDG	0.0810446	0	0.00016935	0.428571	0.714286	1.22407				Classical Complement Pathway	0.145258	0.125	0.145123	0.526316	0.263158	1.20485				NDUFB6	0.115793	0.00991425	0	0.838235	0.558824	1.52277
	IFN	0.123206	0	0.0127564	0.971429	0.114286	1.22168				Unfolded Protein	0.110864	0.375	0.0155334	0.315789	0.315789	1.13298				CD177	0.634301	0.0549789	0	0.455882	0.338235	1.4834
	NLRP3 Inflammasome	0.066767	0	0.0107559	0.142857	0.971429	1.19181				Apoptosis	0.14303	0.25	0.000203305	0.0526316	0.578947	1.02481				AURKA	0.286577	0.033363	0.125	0.294118	0.735294	1.47435
	ROS Protection	0.113955	0.6	0.0124472	0.371429	0.0857143	1.18355				MHC II	0.197171	0.375	0.00370283	0	0.368421	0.944295				HLA-DRB1	0.151903	0.00334801	0	0.735294	0.573529	1.46407
	Unfolded Protein	0.10382	0.2	0.00635166	0.685714	0.171429	1.16731				IFN	0.230847	0.125	0.0046389	0.473684	0.105263	0.939433				PFKFB3	0.177953	0.00693567	0	0.794118	0.455882	1.43489
	Classical Complement Pathway	0.0884636	0	0.010308	0.742857	0.285714	1.12734				pDC	0	0.25	0.000141045	0.105263	0.0526316	0.408036				NDUFS1	0.215137	0.0714527	0.25	0.808824	0.0441177	1.38953
	NFkB Complex	0.146793	0.4	0.0091536	0.0857143	0.4	1.04166					RF	ADB	GB	SVM	NB	Overall		Top 10 Features		HLA-DQA1	0.0728759	0.00563006	0	0.588235	0.705882	1.37262
	TCA cycle	0.0805118	0.2	0.00586096	0.285714	0.371429	0.943516				Cell Cycle	1	0.538462	0.573491	0.421053	1	3.53301		Alternative Complement Pathway		SLC2A5	0.0394019	0.00789953	0	0.691176	0.632353	1.37083
	pDC	0.150461	0.2	0.0049298	0.228571	0.2	0.783962				Pentose Phosphate Signature	0.924087	1	1	0.526316	0	3.4504		Anti inflammation		RETN	0.199319	0.00524812	0	0.941176	0.220588	1.36633
	NK Cell	0.0644967	0.2	0.0151048	0.114286	0.257143	0.65103				Oxidative Phosphorylation	0.218385	0.307692	1.52109e-05	0.578947	0.947368	2.05241		Apoptosis		SLC27A2	0.0226786	0	0	0.5	0.838235	1.36091
	Treg	0	0.2	0.000194454	0.171429	0	0.371623				MHC II	0.0900516	0.230769	0.000819566	0.894737	0.789474	2.00585		Cell Cycle		TTC19	0.0027513	0.00126136	0	0.970588	0.382353	1.35695
	Monocyte	0.0463409	0.2	1.1814e-06	0.0571429	0.0285714	0.332056				Anti inflammation	0.395259	0.230769	0.0854956	0.263158	0.894737	1.86942		Fatty Acid Alpha Oxidation		VSIG4	0.252242	0.0156649	0	0.102941	0.985294	1.35614
4		RF	ADB	GB	SVM	NB	Overall		Top 20 Features		Alternative Complement Pathway	0.185431	0.153846	0.0498927	0.947368	0.473684	1.81022		MHC II		SOCS3	0.0562292	0.0574464	0	0.338235	0.852941	1.30485
	Cell Cycle	1	0.428571	1	0.228571	0.914286	3.57143		Alternative Complement Pathway		Tactivated	0	0.0769231	0.000427104	0.842105	0.736842	1.6563		NLRP3 Inflammasome		IL1R1	0.158219	0.00883289	0	0.397059	0.720588	1.2847
	Pentose Phosphate Signature	0.510188	0.857143	0.810428	0.6	0.514286	3.29204		Anergic / Activated T cells		Fatty Acid Alpha Oxidation	0.0664862	0.153846	0.000870561	0.684211	0.631579	1.53699		Oxidative Phosphorylation		SLC2A4	0.105005	0.0215474	0.125	0.705882	0.323529	1.28096
	Anti inflammation	0.403917	1	0.486058	0.342857	0.428571	2.6614		Anti inflammation		NLRP3 Inflammasome	0.0724937	0.153846	0.0562481	0.736842	0.421053	1.44048		Pentose Phosphate Signature		CFH	0.0552187	0.00714922	0	0.382353	0.808824	1.25354
	Glycolysis	0.630023	0.285714	0.122543	0.771429	0.828571	2.63828		CD40 Activated B Cell		Apoptosis	0.103871	0	0.0205337	1	0.315789	1.44019		Tactivated		CR1	0.249749	0.0107774	0	0.0294118	0.941176	1.23111
	Alternative Complement Pathway	0.492339	0.428571	0.229693	0	0.857143	2.00775		Cell Cycle		CD40 Activated B Cell	0.490107	0.153846	0.01573	0.631579	0.105263	1.39653				C3	0.10476	0.0469961	0.375	0.264706	0.397059	1.18852
	Proinflammatory IL-1 Family	0.213539	0.142857	0.378805	0.857143	0.371429	1.96377		Erythrocytes		Classical Complement Pathway	0.104654	0.0769231	0.156634	0.368421	0.684211	1.39084				PGD	0.238707	0.0116116	0	0.485294	0.441176	1.17679
	Fatty Acid Alpha Oxidation	0.0417811	0.285714	0.0132775	0.8	0.771429	1.9122		Fatty Acid Alpha Oxidation		T Cell	0.221517	0	0.114712	0.789474	0.263158	1.38886				SLC2A1	0.260664	0.0052461	0.125	0.779412	0	1.17032
	CD40 Activated B Cell	0.221359	0.142857	0.0491595	1	0.485714	1.89909		Glycolysis		Platelets	0.329485	0.0769231	0.00389726	0	0.842105	1.25241				PFKFB2	0.309307	0.0109396	0	0.617647	0.176471	1.11436
	TCA cycle	0.0508464	0.142857	0.00154131	0.685714	1	1.88096		Granulocyte		Granulocyte	0.187889	0.0769231	0	0.315789	0.526316	1.10692				IL18R1	0.0279156	0.0132926	0	0.544118	0.514706	1.10003
	pDC	0.0130626	0.142857	0.00148726	0.742857	0.942857	1.84312		IFN		TCA cycle	0.157772	0.230769	0.166437	0.210526	0.210526	0.976031				IL1RN	0	0.0255147	0	0.161765	0.911765	1.09904
	ROS Protection	0.098592	0.142857	0.00053903	0.885714	0.714286	1.84199		MHC II		NFkB Complex	0.24206	0.230769	0.0017693	0.105263	0.368421	0.948283				C5	0.0427442	0.00214768	0	0.25	0.764706	1.0596
	Erythrocytes	0.0767968	0	0.000528082	0.828571	0.8	1.7059		NFkB Complex		Dendritic Cell	0.00666489	0.0769231	0.0126466	0.157895	0.578947	0.833077				CYCS	0.0240207	0.0123511	0	0.882353	0.132353	1.05108
	Unfolded Protein	0.224267	0.571429	0.177693	0.485714	0.171429	1.63053		NK Cell		Cytotoxic, Activated T Cell	0.0212191	0	6.14941e-05	0.473684	0.157895	0.65286				TKTL1	0.287969	0.00638256	0	0.558824	0.161765	1.01494
	NFkB Complex	0.132039	0	0.000951653	0.571429	0.885714	1.59013		pDC		Plasma Cell	0.309868	0.0769231	0.0886163	0.0526316	0.0526316	0.58067				BRCA1	0.166518	0.00250202	0	0.411765	0.426471	1.00726
	IFN	0.06358	0.142857	0.119802	0.628571	0.628571	1.58338		Pentose Phosphate Signature			RF	ADB	GB	SVM	NB	Overall		Top 10 Features		CXCR2	0.128631	0.0119001	0	0.647059	0.147059	0.934648
	MHC II	0.294895	0.285714	0.0498876	0.457143	0.314286	1.40193		Plasma Cell		Cell Cycle	1	0.555556	1	0.631579	0.263158	3.45029		Anti inflammation		IL1B	0.237178	0.0200169	0.125	0.220588	0.308824	0.911607
	NK Cell	0.0397879	0.285714	0.0686749	0.542857	0.457143	1.39418		Proinflammatory IL-1 Family		Anti inflammation	0.724745	1	0.309453	0.894737	0.368421	3.29736		Cell Cycle		DNAJC15	0.125783	0.0494429	0	0.573529	0.117647	0.866402
	Granulocyte	0.221313	0.285714	0.00091861	0.657143	0.228571	1.39366		ROS Protection		MHC II	0.433048	0.444444	0.287718	1	0.736842	2.90205		Fatty Acid Alpha Oxidation		H6PD	0.18395	0.0242053	0	0.0147059	0.588235	0.811096
	Anergic / Activated T cells	0.0330011	0.142857	0.00522572	0.914286	0.285714	1.38108		TCA cycle		Glycolysis	0.694412	0.333333	0.399641	0.315789	0.947368	2.69054		Glycolysis		IL18RAP	0.13428	0.0172519	0	0.132353	0.485294	0.769179
	Plasma Cell	0.349845	0.142857	0.134816	0.4	0.257143	1.28466		Unfolded Protein		Plasma Cell	0.491808	0.222222	0.114444	0.842105	0.631579	2.30216		Inflammatory_Neutrophil		IL1RAP	0.067565	0.00972379	0	0.323529	0.279412	0.68023
	Inflammatory_Neutrophil	0.108365	0.285714	0.0880877	0.2	0.6	1.28217				Fatty Acid Alpha Oxidation	0.180435	0.222222	0.00416381	0.947368	0.894737	2.24893		MHC II		PKM	0.0553563	0	0.125	0.279412	0.205882	0.66565
	Tactivated	0.0702554	0.142857	0.000758002	0.285714	0.742857	1.24244				Pentose Phosphate Signature	0.467042	0.777778	0.259924	0.263158	0.315789	2.08369		Oxidative Phosphorylation		PRPS2	0.132555	0	0	0.147059	0.367647	0.647261
	Treg	0.0499945	0.142857	0	0.971429	0	1.16428				Platelets	0.385441	0	0.00711759	0.578947	0.789474	1.76098		Pentose Phosphate Signature		MCM10	0.421535	0.00915363	0	0.0882353	0.102941	0.621865
	Amino Acid Metabolism	0.0783541	0	0.0274592	0.942857	0.114286	1.16296				Oxidative Phosphorylation	0.0735035	0.222222	0.0719851	0.736842	0.526316	1.63087		Plasma Cell		SLC25A4	0.00718038	0.00124772	0	0.352941	0.235294	0.596663
	Platelets	0.193993	0	0.014438	0.371429	0.571429	1.15129				Inflammatory_Neutrophil	0.229989	0.444444	0.179727	0.0526316	0.684211	1.591		Platelets		MCM2	0.237915	0.00940667	0	0.191176	0.0735294	0.512028
	Fatty Acid Beta Oxidation	0	0	0.00819498	0.428571	0.657143	1.09391				T Cell	0.132645	0.444444	0.100697	0.789474	0.105263	1.57252				HAAO	0.148876	0.0651612	0	0.205882	0.0588235	0.478743
	NLRP3 Inflammasome	0.0445819	0	0.0931759	0.514286	0.4	1.05204				LDG	0.056714	0	0.0143864	0.368421	1	1.43952				HLA-DPB1	0.191548	0.033186	0	0.0735294	0.0294118	0.327675
	Cytotoxic, Activated T Cell	0.0424643	0	0.000345686	0.314286	0.685714	1.04281				Anergic / Activated T cells	0.0125437	0.222222	0	0.421053	0.578947	1.23477				E2F3	0.306381	0.00202102	0	0	0.0147059	0.323108
	LDG	0.0332491	0	0.00916564	0.0285714	0.971429	1.04241				CD40 Activated B Cell	0.336009	0.111111	0.0113621	0.684211	0	1.14269					LR	RF	ADB	GB	SVM	Overall		Top 20 Genes
	Oxidative Phosphorylation	0.112274	0.285714	0.163374	0.142857	0.2	0.90422				Erythrocytes	0.0394021	0	0.017645	0.526316	0.473684	1.05705				UQCRB	1	0.592681	0.111111	1	1	3.70379		ASPM
	TNF	0.0279454	0	2.57211e-05	0.714286	0.0857143	0.827971				TCA cycle	0.11226	0.333333	0.0774081	0.105263	0.421053	1.04932				COX6C	0.66182	1	0	0.00497049	0.676471	2.34326		CCNB2
	Monocyte	0.0170068	0	6.59105e-05	0.171429	0.542857	0.731358				Fatty Acid Beta Oxidation	0	0	0.000221968	0	0.842105	0.842327				SLC2A3	0.447597	0.55423	0.888889	0	0.426471	2.31719		CD177
	Classical Complement Pathway	0.107408	0	0.0369525	0.114286	0.342857	0.601503				Amino Acid Metabolism	0.0784463	0	0.0203841	0.473684	0.157895	0.730409				MKI67	0.714964	0.14193	0.222222	5.43e-17	0.970588	2.0497		CDC20
	T Cell	0.140055	0.285714	0.0210093	0.0857143	0.0571429	0.589635				Granulocyte	0.148663	0.222222	0.021392	0.157895	0.0526316	0.602803				NDUFAF7	0.384071	0.0746515	1	1.52e-10	0.588235	2.04696		CLC
	Dendritic Cell	0.0524833	0.142857	0.00268733	0.0571429	0.142857	0.398028				TNF	0.00506834	0	8.76503e-05	0.210526	0.210526	0.426209				COX7B	0.995219	0.7098	0.111111	0.00998724	0.132353	1.95847		COX6C
	Apoptosis	0.089643	0	0.0182951	0.257143	0.0285714	0.393652					RF	DTREE	ADB	GB	SVM	Overall		Top 10 Features		CDC20	0.882086	0.0463286	0.111111	7.37e-05	0.852941	1.89254		COX7B
5		RF	DTREE	ADB	GB	SVM	Overall		Top 20 Features		Cell Cycle	1	1	0.7	1	0.263158	3.96316		Alternative Complement Pathway		COX7C	0.562868	0.463251	0.111111	4.4e-08	0.661765	1.79899		COX7C
	Cell Cycle	1	1	0.833333	0.993052	0.8	4.62638		Alternative Complement Pathway		Pentose Phosphate Signature	0.72002	0	0.5	0.480911	0.789474	2.4904		Anti inflammation		CCNB2	0.964262	0.274432	0	0.173787	0.382353	1.79483		GINS2
	Anti inflammation	0.340473	0.21379	1	0.0109302	0.885714	2.45091		Amino Acid Metabolism		Glycolysis	0.637919	0.605591	0.3	0.387806	0.421053	2.35237		Apoptosis		CD177	0.748229	0.0984795	0	0	0.794118	1.64083		MCM10
	Pentose Phosphate Signature	0.551841	0	0.5	1	0.228571	2.28041		Anergic / Activated T cells		Anti inflammation	0.494277	0	1	0.382539	0.105263	1.98208		Cell Cycle		MCM10	0.568854	0.0381855	0	0	0.941176	1.54822		MCM2
	Glycolysis	0.471997	0	0.833333	0.370415	0.514286	2.19003		Anti inflammation		Classical Complement Pathway	0.210393	0.528167	0.1	0.180028	0.842105	1.86069		Classical Complement Pathway		NDUFB3	0.518528	0.274203	0.666667	0.00563835	0.0147059	1.47974		MKI67
	Alternative Complement Pathway	0.464413	0.623478	0.5	0.321387	0	1.90928		Apoptosis		Alternative Complement Pathway	0.264672	0.335992	0.4	0.151584	0.578947	1.73119		Glycolysis		CLC	0.827773	0.105155	0.222222	0	0.235294	1.39044		NDUFAF5
	CD40 Activated B Cell	0.165981	0.0592947	0	0.397635	0.828571	1.45148		CD40 Activated B Cell		Oxidative Phosphorylation	0.131251	0.0598048	0.4	0.0294863	1	1.62054		Oxidative Phosphorylation		TMEM126B	0.485119	0.162457	0.111111	2.66e-05	0.514706	1.27342		NDUFAF7
	pDC	0.110828	0	0.333333	0.000275998	1	1.44444		Cell Cycle		Proinflammatory IL-1 Family	0.150333	0.05843	0.2	0.256088	0.631579	1.29643		Pentose Phosphate Signature		TRAP1	0.287163	0.00264966	0.444444	3.96e-05	0.529412	1.26371		NDUFB3
	Amino Acid Metabolism	0.0675572	0.0724713	0.333333	0.000276017	0.942857	1.41649		Classical Complement Pathway		Apoptosis	0.132583	0	0.2	0.040873	0.894737	1.26819		Proinflammatory IL-1 Family		GINS2	0.430198	0.0140148	0.111111	2.77e-17	0.691176	1.2465		OSM
	Granulocyte	0.0851934	0	0.333333	7.66769e-06	0.971429	1.38996		Dendritic Cell		TCA cycle	0.128482	0	0.1	0.130224	0.736842	1.09555		TCA cycle		MCM2	0.259102	0.0149842	0	0	0.955882	1.22997		SLC2A3
	TCA cycle	0.0599973	0	0.166667	0.407694	0.685714	1.32007		Glycolysis		Granulocyte	0.382328	0	0.3	0.00529725	0.368421	1.05605				ASPM	0.0555438	0.0689276	0.111111	5.17e-06	0.985294	1.22088		TMEM126B
	MHC II	0.231213	0	0.833333	0.0507306	0.0285714	1.14385		Granulocyte		Cytotoxic, Activated T Cell	0	0	0	0	0.947368	0.947368				OSM	0.278669	0.0345086	0.777778	0	0.0882353	1.17919		TRAP1
	Oxidative Phosphorylation	0.0261283	0	0.833333	0.0692174	0.2	1.12868		IFN		CD40 Activated B Cell	0.329798	0	0.2	0.0696167	0.210526	0.809941				NDUFAF5	0.532184	0.138481	0	0.00137313	0.5	1.17204		UQCRB
	Apoptosis	0.0133409	0.139798	0	0.0631106	0.857143	1.07339		Inflammatory_Neutrophil		Fatty Acid Alpha Oxidation	0.0578586	0	0.2	0.000944477	0.526316	0.785119				NDUFA5	0.474133	0.0779038	0	9.06e-09	0.617647	1.16968
	Dendritic Cell	0.0134533	0	0.333333	0.0206348	0.628571	0.995993		MHC II		Amino Acid Metabolism	0.261555	0	0	0.0370093	0.473684	0.772248				NDUFA2	0.332636	0.0174382	0	7.85e-06	0.764706	1.11479
	Inflammatory_Neutrophil	0.148999	0	0.333333	0.00370178	0.485714	0.971749		Oxidative Phosphorylation		TNF	0.0534462	0	0	0.0203465	0.684211	0.758003				IL18RAP	0.145524	0.0228698	0.111111	0	0.823529	1.10303
	IFN	0.112646	0.17455	0.166667	0.0509056	0.457143	0.96191		pDC		Treg	0.0585937	0	0.2	0.00300869	0.315789	0.577392				HAAO	0.192034	0.0647353	0.111111	5.87e-11	0.720588	1.08847
	Unfolded Protein	0.109794	0.372995	0.166667	0.131225	0.171429	0.952109		Pentose Phosphate Signature		Tactivated	0.0187172	0.112921	0.1	0.0190846	0.157895	0.408617				IL1R1	0.200726	0.015041	0	0.00224231	0.867647	1.08566
	Anergic / Activated T cells	0	0	0	0.0082674	0.914286	0.922553		Proinflammatory IL-1 Family		T Cell	0.212639	0	0	0.0858731	0	0.298513				BRCA1	0.152453	0.00400468	0	0	0.911765	1.06822
	Proinflammatory IL-1 Family	0.162301	0	0	0.398438	0.342857	0.903596		TCA cycle		Anergic / Activated T cells	0.0720574	0	0.1	0.00132292	0.0526316	0.226012				IL1RN	0.0992951	0.0115148	0	0.00513035	0.897059	1.013
	Classical Complement Pathway	0.112958	0	0	0.0656363	0.714286	0.89288		Unfolded Protein			RF	ADB	LDA	GB	SVM	Overall		Top 10 Features		PTTG1	0.571743	0.0134818	0.111111	0.00274615	0.308824	1.00791
	Plasma Cell	0.437394	0	0	0.186783	0.257143	0.88132				Pentose Phosphate Signature	0.902227	0.571429	1	1	0.736842	4.2105		Alternative Complement Pathway		IL1B	0.300336	0.0598427	0	2.36e-06	0.632353	0.992534
	Platelets	0.178934	0	0.333333	0.0185937	0.314286	0.845147				Cell Cycle	1	1	0.776193	0.792108	0.105263	3.67356		Anti inflammation		HLA-DRB1	0.207097	0.00213647	0	0.00386101	0.779412	0.992506
	Erythrocytes	0.0537563	0	0.166667	0.00140312	0.6	0.821826				Anti inflammation	0.36088	1	0.360918	0.0812959	1	2.80309		Cell Cycle		HLA-DMA	0.251974	0.00239075	0	0	0.735294	0.989659
	TNF	0.0551924	0	0	0.0067842	0.742857	0.804834				Plasma Cell	0.353567	0.714286	0.0590627	0.164979	0.842105	2.134		Glycolysis		C5	0.0434788	0.00479134	0	2.89e-08	0.926471	0.974741
	Treg	0.00729161	0	0	0.000886745	0.771429	0.779607				Glycolysis	0.559338	0.142857	0.38519	0.26422	0.631579	1.98318		Granulocyte		CR1	0.289914	0.00471144	0	3.72e-07	0.647059	0.941685
	Cytotoxic, Activated T Cell	0.0687097	0	0	6.84123e-07	0.657143	0.725853				T Cell	0.116081	0.714286	0.0927316	0.135357	0.789474	1.84793		MHC II		CEP55	0.539814	0.129492	0	0.00421678	0.264706	0.938228
	Fatty Acid Alpha Oxidation	0.101454	0	0	0.000506968	0.571429	0.67339				TCA cycle	0.0911807	0.285714	0.90503	0.173785	0.263158	1.71887		Pentose Phosphate Signature		IL1RAP	0.0497517	0.00369335	0	0.00079604	0.882353	0.936594
	Fatty Acid Beta Oxidation	0.0367309	0	0	0.0237433	0.542857	0.603331				Granulocyte	0.447049	0.285714	0.0696784	7.82349e-05	0.894737	1.69726		Plasma Cell		H6PD	0.208278	0.00875559	0	3.52e-06	0.705882	0.922919
	NK Cell	0.0861829	0	0.166667	0.10925	0.142857	0.504957				Alternative Complement Pathway	0.197347	0.428571	0.529779	0.0338731	0.473684	1.66325		T Cell		CCNB1	0.490222	0.292828	0.111111	3.39e-06	0	0.894165
	NLRP3 Inflammasome	0.0668033	0	0	0.000280243	0.428571	0.495655				MHC II	0.127863	0.285714	0.164645	0.0498678	0.947368	1.57546		TCA cycle		HLA-DPB1	0.124016	0.0177804	0	0	0.75	0.891796
	LDG	0.0408541	0	0	0.000638225	0.4	0.441492				Proinflammatory IL-1 Family	0.274051	0.428571	0.352126	0.192578	0.157895	1.40522				RETN	0.284913	0.00089264	0	4.76e-07	0.602941	0.888747
	ROS Protection	0.0378285	0	0	0.00310494	0.371429	0.412362				Fatty Acid Alpha Oxidation	0	0.285714	0.39107	0	0.684211	1.361				HLA-DQA1	0.0116275	0.00232144	0	0	0.838235	0.852184
	NFkB Complex	0.117082	0	0.166667	0.00723246	0.114286	0.405267				Inflammatory_Neutrophil	0.176245	0.142857	0.303564	0.00330372	0.526316	1.15229				IL18R1	0.00205018	0.0132076	0	0	0.808824	0.824081
	T Cell	0.0624377	0	0	0.000701026	0.285714	0.348853				Dendritic Cell	0.034129	0.285714	0.147918	0.00887313	0.578947	1.05558				TKTL1	0.29509	0.0057093	0	0	0.485294	0.786094
	Tactivated	0.0541626	0	0	0.0139876	0.0857143	0.153864				CD40 Activated B Cell	0.416433	0	0.375131	0.0231187	0.210526	1.02521				E2F3	0.354219	0.0084799	0	0	0.411765	0.774464
	Monocyte	0.0253224	0.0393671	0	0	0.0571429	0.121832				Anergic / Activated T cells	0.124839	0	0.328171	0.0053124	0.368421	0.826744				C3	0.117528	0.0283192	0	1.95e-08	0.544118	0.689964
6		RF	ADB	GB	SVM	NB	Overall		Top 20 Features		Fatty Acid Beta Oxidation	0.0340686	0.142857	0.305497	0.017238	0.315789	0.81545				SLC2A1	0.278533	0	0	0	0.367647	0.64618
	Cell Cycle	1	0.833333	0.324795	0.628571	0.657143	3.44384		Alternative Complement Pathway		Cytotoxic, Activated T Cell	0.0817942	0.142857	0.0373233	0.00814377	0.421053	0.691171				CYCS	0.0534245	0.00694772	0	3.93e-11	0.573529	0.633902
	Pentose Phosphate Signature	0.951099	0.666667	1	0.4	0.2	3.21777		Anti inflammation		Amino Acid Metabolism	0.313383	0	0.202325	0.0326904	0.0526316	0.601031				SOCS3	0.101359	0.0346929	0	0.00035685	0.470588	0.606997
	Anti inflammation	0.357027	0.666667	0.0208665	0.885714	0.828571	2.75885		Apoptosis		IFN	0.173209	0.285714	0	0.0586109	0	0.517535				COX11	0.155544	0.0074852	0	0.00097492	0.397059	0.561063
	MHC II	0.247875	1	0.00957559	0.2	0.857143	2.31459		CD40 Activated B Cell			RF	ADB	GB	SVM	NB	Overall		Top 10 Features		TTC19	0	0.00133708	0	0.00078093	0.558824	0.560942
	CD40 Activated B Cell	0.285134	0.166667	0.130162	0.657143	0.771429	2.01053		Cell Cycle		Cell Cycle	1	1	1	0.947368	0.368421	4.31579		Alternative Complement Pathway		AURKA	0.336556	0.0509332	0	0	0.161765	0.549254
	Plasma Cell	0.427338	0.166667	0.0002731	0.8	0.514286	1.90856		Classical Complement Pathway		Alternative Complement Pathway	0.425824	0.5	0.252865	1	0.842105	3.02079		Anergic / Activated T cells		TYMS	0.161644	0.00595352	0	0	0.338235	0.505833
	NFkB Complex	0.110396	0.166667	0.000582492	1	0.628571	1.90622		Cytotoxic, Activated T Cell		Anti inflammation	0.569833	1	0.237222	0.210526	1	3.01758		Anti inflammation		SLC2A5	0.0469303	0	0	0	0.455882	0.502813
	Alternative Complement Pathway	0.623828	0.833333	0.251672	0	0.142857	1.85169		Dendritic Cell		Glycolysis	0.514524	0.666667	0.259785	0.578947	0.578947	2.59887		Cell Cycle		PFKFB2	0.342457	0.00941401	0	0	0.117647	0.469518
	T Cell	0.24045	0.5	0.0133323	0.285714	0.714286	1.75378		Fatty Acid Alpha Oxidation		Pentose Phosphate Signature	0.479247	0.666667	0.360986	0.631579	0.315789	2.45427		Erythrocytes		COA1	0.204004	0.040182	0	0.00019393	0.220588	0.464969
	Classical Complement Pathway	0.102708	0	0.00791716	0.6	0.971429	1.68205		Granulocyte		IFN	0.113896	0.5	0.260844	0.684211	0.789474	2.34842		Fatty Acid Alpha Oxidation		SLC2A4	0.00858287	0.0150766	0	1.59e-08	0.441176	0.464836
	Dendritic Cell	0.0513888	0.166667	0.000630523	0.542857	0.914286	1.67583		MHC II		Anergic / Activated T cells	0.0835093	0.333333	0.00937484	0.894737	0.736842	2.0578		Glycolysis		PKM	0.0566489	0.00750318	0.111111	0.00025461	0.279412	0.45493
	TCA cycle	0.110407	0	0.00441107	0.771429	0.742857	1.6291		NFkB Complex		Fatty Acid Alpha Oxidation	0.00593625	0.5	0	0.526316	0.894737	1.92699		Granulocyte		PGD	0.255786	0.0122492	0	0	0.176471	0.444506
	NLRP3 Inflammasome	0.0642585	0	0.219484	0.342857	1	1.6266		NLRP3 Inflammasome		Granulocyte	0.201613	0.5	0.0390771	0.842105	0.210526	1.79332		IFN		PRPS2	0.139921	0.00395921	0	0	0.294118	0.437998
	Tactivated	0.052709	0	0.000404046	0.685714	0.885714	1.62454		Oxidative Phosphorylation		Erythrocytes	0.00403988	0	0.000381837	0.736842	0.947368	1.68863		Pentose Phosphate Signature		SLC27A2	0.0536399	0.00118494	0	1.9e-17	0.352941	0.407766
	Oxidative Phosphorylation	0.0613649	0.833333	0.109989	0.257143	0.257143	1.51897		Pentose Phosphate Signature		Inflammatory_Neutrophil	0.147838	0.333333	0.00348071	0.473684	0.684211	1.64255				VSIG4	0.255792	0.0246823	0	4.4e-08	0.102941	0.383416
	Platelets	0.319115	0.166667	0.0032691	0.0857143	0.942857	1.51762		Plasma Cell		Oxidative Phosphorylation	0	0.166667	0.0659722	0.789474	0.473684	1.4958				NDUFS1	0.248614	0.052624	0	0.00410083	0.0735294	0.378868
	Granulocyte	0.118368	0.333333	3.61147e-06	0.485714	0.542857	1.48028		Platelets		Tactivated	0.0801767	0.666667	0.070812	0.421053	0.157895	1.3966				DNAJC15	0.165639	0.0174638	0	1.58e-06	0.191176	0.374281
	Cytotoxic, Activated T Cell	0.061317	0	0.000107023	0.571429	0.8	1.43285		T Cell		Classical Complement Pathway	0.125102	0.333333	0.102615	0.105263	0.631579	1.29789				SLC25A4	0.020636	0.00394363	0	0	0.323529	0.348109
	Fatty Acid Alpha Oxidation	0.0629538	0.333333	0	0.971429	0.0571429	1.42486		Tactivated		TCA cycle	0.092092	0.5	0.0916169	0.263158	0.263158	1.21002				PFKFB3	0.189486	0.00747333	0	0.00029004	0.147059	0.344308
	Apoptosis	0.0393436	0	0.000751143	0.828571	0.485714	1.35438		TCA cycle		CD40 Activated B Cell	0.229807	0.333333	0.0357584	0.368421	0.0526316	1.01995				CFH	0.0610467	0.00132065	0	0.00011592	0.25	0.312483
	Glycolysis	0.495623	0.333333	0.0303386	0.428571	0.0285714	1.31644				ROS Protection	0.0221334	0	6.66378e-05	0.157895	0.526316	0.706411				COX20	0.0931576	0.00760723	0	9.01e-05	0.205882	0.306737
	Erythrocytes	0.0979723	0	4.03516e-07	0.514286	0.685714	1.29797				Amino Acid Metabolism	0.0965048	0	0.0221806	0.0526316	0.421053	0.59237				CXCR2	0.177808	0.0390916	0	0.00221203	0.0294118	0.248523
	Anergic / Activated T cells	0.0774561	0	9.6648e-05	0.914286	0.285714	1.27755				Proinflammatory IL-1 Family	0.08105	0.333333	0.071816	0	0	0.486199				CTSS	0.185128	0.0025508	0	4.76e-05	0.0441177	0.231844
	Proinflammatory IL-1 Family	0.247163	0.166667	0.221836	0.0571429	0.571429	1.26424				Cytotoxic, Activated T Cell	0.0217079	0	0.000890926	0.315789	0.105263	0.443651				NDUFB6	0.0775328	0.00134825	0	0.00384542	0.0588235	0.14155
	Amino Acid Metabolism	0.11914	0	2.13051e-05	0.942857	0.114286	1.1763															LR	RF	ADB	GB	NB	Overall		Top 20 Genes
	Treg	0.0065288	0	0.000180192	0.742857	0.371429	1.12099														COX7C	0.5549	0.457925	0.5	1	0.544118	3.05694		CCNB2
	Monocyte	0.0672868	0.166667	0.00229857	0.228571	0.6	1.06482														COX6C	0.635233	1	0.166667	0.634757	0.514706	2.95136		CD177
	NK Cell	0.100797	0.166667	0.00244574	0.314286	0.4	0.984195														COX7B	0.976602	0.674822	0.5	1.12e-17	0.661765	2.81319		CDC20
	TNF	0.0347444	0	0.0483923	0.857143	0	0.94028														MKI67	0.766537	0.26487	0.333333	1.12e-17	0.911765	2.2765		CEP55
	ROS Protection	0.0944172	0	7.11438e-05	0.714286	0.0857143	0.894488														SLC2A3	0.417168	0.585137	0.833333	3.59e-07	0.220588	2.05623		CLC
	pDC	0.0996151	0.166667	5.64263e-05	0.142857	0.457143	0.866338														UQCRB	1	0.484162	0	0.199938	0.25	1.9341		COX6C
	Unfolded Protein	0.168313	0.333333	0.0216471	0.171429	0.171429	0.866151														CLC	0.857173	0.156385	0.333333	0.00246614	0.5	1.84936		COX7B
	IFN	0.0805782	0	0.0239121	0.371429	0.342857	0.818776														CCNB2	0.966764	0.171577	0.333333	0.00689137	0.367647	1.84621		COX7C
	Fatty Acid Beta Oxidation	0	0	0.0157545	0.457143	0.228571	0.701469														NDUFAF7	0.375544	0.1118	1	0.247501	0.102941	1.83779		IL1B
	Inflammatory_Neutrophil	0.0896474	0.166667	0.00128019	0.0285714	0.314286	0.600451														CEP55	0.58544	0.256594	0.166667	7.91e-05	0.794118	1.8029		MCM10
	LDG	0.0317446	0	0.000140549	0.114286	0.428571	0.574742														CD177	0.83525	0.115776	0	1.12e-17	0.808824	1.75985		MKI67
7		RF	ADB	GB	SVM	NB	Overall		Top 20 Features												NDUFA2	0.320318	0.0239843	0.5	1.12e-17	0.838235	1.68254		NDUFA2
	Pentose Phosphate Signature	0.703936	1	1	0.457143	0.2	3.36108		Amino Acid Metabolism												NDUFB3	0.535089	0.292028	0.666667	1.12e-17	0.176471	1.67025		NDUFAF5
	Cell Cycle	1	0.833333	0.280801	0.714286	0.485714	3.31413		Anergic / Activated T cells												OSM	0.296473	0.0310099	0.833333	0.00111096	0.485294	1.64722		NDUFAF7
	Anti inflammation	0.326178	0.833333	0.0797292	0.6	0.657143	2.49638		Anti inflammation												NDUFAF5	0.530878	0.155186	0.333333	0.0212592	0.573529	1.61419		NDUFB3
	MHC II	0.246394	0.5	0.0896326	0.428571	0.971429	2.23603		CD40 Activated B Cell												CDC20	0.875004	0.0181187	0.166667	1.12e-17	0.397059	1.45685		NDUFS1
	Erythrocytes	0.112268	0.333333	0.0832181	0.828571	0.857143	2.21453		Cell Cycle												PTTG1	0.560165	0.0109843	0.166667	1.12e-17	0.691176	1.42899		OSM
	Glycolysis	0.564825	0.166667	0.159681	0.914286	0.314286	2.11974		Erythrocytes												MCM10	0.538438	0.0200004	0	1.12e-17	0.867647	1.42608		PTTG1
	Plasma Cell	0.363187	0.333333	0.146033	0.228571	1	2.07112		Fatty Acid Alpha Oxidation												IL1B	0.29567	0.0507281	0	0.108581	0.941176	1.39616		SLC2A3
	Oxidative Phosphorylation	0.0604806	0.5	0.295087	0.142857	0.914286	1.91271		Fatty Acid Beta Oxidation												NDUFS1	0.244746	0.0990069	0.166667	0.00168687	0.779412	1.29152		UQCRB
	CD40 Activated B Cell	0.129256	0	0.228873	0.657143	0.885714	1.90099		Glycolysis												PKM	0.0422025	0.0316434	0.166667	1.12e-17	1	1.24051
	TCA cycle	0.044169	0.166667	0.00961803	1	0.571429	1.79188		Granulocyte												VSIG4	0.210266	0.0246992	0	0.00652573	0.985294	1.22679
	Amino Acid Metabolism	0.214917	0	0.185643	0.542857	0.8	1.74342		Inflammatory_Neutrophil												CCNB1	0.485923	0.155223	0.166667	1.12e-17	0.352941	1.16075
	TNF	0.0145454	0.166667	0.002958	0.685714	0.742857	1.61274		LDG												TMEM126B	0.458885	0.0689278	0	1.12e-17	0.632353	1.16017
	Fatty Acid Beta Oxidation	0.00470114	0	0.000417195	0.885714	0.685714	1.57655		MHC II												SLC2A5	0.0703827	0.00715252	0.166667	1.12e-17	0.897059	1.14126
	Inflammatory_Neutrophil	0.13893	0.166667	0.0202542	0.971429	0.257143	1.55442		Oxidative Phosphorylation												TKTL1	0.278626	0.0042881	0	1.12e-17	0.852941	1.13586
	Granulocyte	0.134485	0	9.29258e-05	0.942857	0.4	1.47743		Pentose Phosphate Signature												HLA-DPB1	0.14316	0.0191611	0	1.12e-17	0.970588	1.13291
	Anergic / Activated T cells	0.0402502	0	0.0217924	0.571429	0.828571	1.46204		Plasma Cell												IL18RAP	0.152471	0.0084385	0	1.12e-17	0.955882	1.11679
	Fatty Acid Alpha Oxidation	0.0752078	0.166667	0.0185267	0.857143	0.342857	1.4604		Platelets												RETN	0.205039	0.00467728	0.166667	1.12e-17	0.676471	1.05285
	LDG	0.0200693	0.166667	0.0011606	0.485714	0.771429	1.44504		T Cell												ASPM	0.0591343	0.0469299	0	0.0003267	0.926471	1.03286
	T Cell	0.137489	0.333333	0.0379899	0.4	0.514286	1.4231		TCA cycle												SLC2A1	0.269238	0.00128962	0	1.12e-17	0.75	1.02053
	Platelets	0.197192	0.333333	0	0.314286	0.542857	1.38767		TNF												PFKFB2	0.374044	0.0158704	0	1.12e-17	0.617647	1.00756
	Alternative Complement Pathway	0.317104	0.666667	0.0223694	0	0.285714	1.29185														CTSS	0.182991	0	0	0.00014379	0.823529	1.00666
	IFN	0.0735127	0	0.0127737	0.771429	0.428571	1.28629														COA1	0.206832	0.0157222	0	1.12e-17	0.764706	0.98726
	Proinflammatory IL-1 Family	0.154664	0.166667	0.154526	0.342857	0.457143	1.27586														IL1RN	0.0627774	0.0181943	0	0.0210918	0.882353	0.984416
	NK Cell	0.0508976	0.166667	0.0108258	0.0857143	0.942857	1.25696														BRCA1	0.16051	0	0	1.12e-17	0.735294	0.895805
	Classical Complement Pathway	0.0556076	0	0.0145911	0.514286	0.628571	1.21306														PRPS2	0.187995	0	0	1.12e-17	0.705882	0.893877
	NFkB Complex	0.12139	0.166667	0.00179422	0.0571429	0.714286	1.06128														COX20	0.105787	0.02021	0	0.00814329	0.720588	0.854728
	Cytotoxic, Activated T Cell	0.0300067	0.166667	0.0012681	0.742857	0.114286	1.05508														AURKA	0.356356	0.0394541	0	1.12e-17	0.441176	0.836987
	Dendritic Cell	0.00971466	0.166667	0.00102012	0.8	0.0285714	1.00597														CR1	0.256819	0.00542218	0	3.24e-10	0.558824	0.821065
	pDC	0.0978128	0.333333	0.00357855	0.2	0.228571	0.863296														TYMS	0.106772	0.00182448	0	0.00135384	0.647059	0.757009
	Tactivated	0.0473927	0.166667	1.31544e-06	0.257143	0.371429	0.842632														HLA-DRB1	0.130669	0.00657475	0	0.00046794	0.602941	0.740653
	Monocyte	0.0156977	0.166667	3.23038e-05	0.0285714	0.6	0.810968														TRAP1	0.310738	0.00131398	0	0.00364575	0.382353	0.698051
	Apoptosis	0.0367008	0	0.000386427	0.628571	0.142857	0.808516														PGD	0.212546	0.00355546	0	1.12e-17	0.455882	0.671984
	Unfolded Protein	0.0665652	0.166667	0.000139909	0.171429	0.171429	0.576229														COX11	0.182318	0.0113153	0	0	0.470588	0.664222
	ROS Protection	0.0264837	0	0.0829898	0.371429	0.0857143	0.566616														NDUFA5	0.430654	0.0072319	0.166667	2.75e-08	0	0.604553
	Treg	0	0	0.00196736	0.285714	0	0.287682														CYCS	0	0.0128182	0	2.94e-05	0.588235	0.601083
	NLRP3 Inflammasome	0.0250641	0	0.0200913	0.114286	0.0571429	0.216584														CFH	0.119328	0.00274282	0	1.12e-17	0.426471	0.548541
8		RF	ADB	LDA	GB	SVM	Overall		Top 20 Features												SLC25A4	0.00629809	0.00640125	0	1.12e-17	0.529412	0.542111
	Pentose Phosphate Signature	0.873395	1	0.610842	1	1	4.48424		Alternative Complement Pathway												PFKFB3	0.188502	0.0112959	0	0.00075103	0.323529	0.524078
	Cell Cycle	1	1	0.187733	0.517433	0.8	3.50517		Amino Acid Metabolism												CXCR2	0.192606	0.0194297	0	2.17e-10	0.308824	0.520859
	Anti inflammation	0.399627	0.833333	0.345506	0.0173836	0.885714	2.48156		Anergic / Activated T cells												HLA-DMA	0.251438	0.0135667	0.166667	2.9e-05	0.0882353	0.519935
	TNF	0.00613902	0.166667	1	0.000548633	0.742857	1.91621		Anti inflammation												E2F3	0.3194	0	0.166667	1.12e-17	0.0147059	0.500773
	Oxidative Phosphorylation	0.0859651	0.666667	0.523715	0.201992	0.428571	1.90691		Apoptosis												DNAJC15	0.15075	0.0458811	0	1.12e-17	0.279412	0.476043
	Apoptosis	0.0539517	0.166667	0.552104	0	0.857143	1.62987		CD40 Activated B Cell												IL1R1	0.264811	0.0123017	0	5.05e-08	0.191176	0.468289
	Glycolysis	0.498354	0.333333	0.174531	0.09382	0.514286	1.61432		Cell Cycle												MCM2	0.302902	0.0174911	0	1.12e-17	0.147059	0.467452
	Granulocyte	0.149389	0.166667	0.199678	6.54864e-06	0.971429	1.48717		Classical Complement Pathway												C5	0.0881947	0.00384309	0	1.12e-17	0.338235	0.430273
	CD40 Activated B Cell	0.180307	0.166667	0	0.0556104	0.828571	1.23116		Cytotoxic, Activated T Cell												GINS2	0.389371	0.0021554	0	1.12e-17	0.0294118	0.420938
	Classical Complement Pathway	0.141978	0	0.209272	0.141887	0.714286	1.20742		Fatty Acid Alpha Oxidation												TTC19	0.00360214	0	0	1.12e-17	0.411765	0.415367
	Proinflammatory IL-1 Family	0.192372	0.333333	0.148405	0.176355	0.314286	1.16475		Glycolysis												NDUFB6	0.0693286	0.0220436	0	1.12e-17	0.294118	0.38549
	Alternative Complement Pathway	0.298163	0.666667	0.192951	0.00540547	0	1.16319		Granulocyte												SOCS3	0.0817329	0.034929	0	1.12e-17	0.235294	0.351956
	Amino Acid Metabolism	0.14778	0	0.00924476	0.00334475	0.942857	1.10323		Oxidative Phosphorylation												SLC27A2	0.071064	0.00229184	0	1.12e-17	0.264706	0.338062
	T Cell	0.159155	0.5	0.0504804	0.0191403	0.371429	1.1002		Pentose Phosphate Signature												C3	0.0683253	0.0309351	0.166667	0.00561051	0.0441177	0.315655
	Anergic / Activated T cells	0.0675171	0	0.0855928	1.9933e-06	0.914286	1.0674		Proinflammatory IL-1 Family												SLC2A4	0.116108	0.0107489	0	0.0166467	0.161765	0.305269
	Treg	0.0522337	0.166667	0.0567402	1.36568e-05	0.685714	0.961369		T Cell												HAAO	0.138487	0.0405389	0	8.64e-07	0.0735294	0.252557
	Tactivated	0.0535421	0	0.0920383	0.00288716	0.771429	0.919896		Tactivated												IL1RAP	0.0386091	0.00747674	0	3.57e-09	0.205882	0.251968
	TCA cycle	0.0684072	0.333333	0.227263	0.000466211	0.285714	0.915184		TCA cycle												H6PD	0.182849	0.00498137	0	4.36e-09	0.0588235	0.246654
	Fatty Acid Alpha Oxidation	0.0135316	0.166667	0.146848	0.0155793	0.571429	0.914054		TNF												HLA-DQA1	0.08041	0.00153161	0	0.00561625	0.117647	0.205205
	Cytotoxic, Activated T Cell	0.0192054	0.166667	0.0662534	8.4545e-05	0.657143	0.909353		Treg												IL18R1	0.00184647	0.0223725	0	1.12e-17	0.132353	0.156572
	Plasma Cell	0.261376	0.166667	0.160423	0.0874564	0.228571	0.904493															LR	RF	ADB	SVM	NB	Overall		Top 20 Genes
	Fatty Acid Beta Oxidation	0.0213702	0	0.328097	0.0066215	0.542857	0.898945														COX7C	0.555814	0.535435	0.5	1	0.705882	3.29713		C3
	Erythrocytes	0.070389	0.166667	0.00575244	0.000398919	0.6	0.843207														SLC2A3	0.423045	0.542913	1	0.558824	0.691176	3.21596		CCNB1
	IFN	0.0296178	0.166667	0.128659	0.0143179	0.457143	0.796404														UQCRB	1	0.482502	0	0.970588	0.647059	3.10015		CCNB2
	Inflammatory_Neutrophil	0.0858848	0.166667	0.0334115	8.47065e-05	0.485714	0.771762														COX7B	0.953491	0.702631	0.333333	0.25	0.661765	2.90122		CD177
	ROS Protection	0.0631708	0	0.331413	0.0003734	0.342857	0.737815														COX6C	0.647755	1	0.166667	0.426471	0.602941	2.84383		CDC20
	NLRP3 Inflammasome	0.0283756	0	0.557477	0.00676759	0.142857	0.735477														CCNB2	0.991146	0.290468	0.5	0.397059	0.220588	2.39926		CEP55
	Dendritic Cell	0	0	0.0131336	0.0118948	0.628571	0.6536														CCNB1	0.467681	0.225213	0.333333	0.985294	0.367647	2.37917		COX6C
	Platelets	0.230019	0	0.15758	0.000384867	0.257143	0.645127														MKI67	0.686534	0.202712	0.333333	0.632353	0.514706	2.36964		COX7B
	NK Cell	0.0616353	0.333333	0.105837	0.00201201	0.114286	0.617104														CD177	0.65243	0.111143	0.5	0.323529	0.676471	2.26357		COX7C
	MHC II	0.101991	0.333333	0.0967041	0.00756729	0.0285714	0.568167														C3	0.101834	0.0298713	0.333333	0.676471	1	2.14151		GINS2
	LDG	0.0339211	0	0.0188404	0.00620214	0.4	0.458964														HLA-DMA	0.266706	0.0023456	0.166667	0.764706	0.882353	2.08278		HLA-DMA
	Unfolded Protein	0.0220788	0.166667	0.0759343	0.000881387	0.171429	0.43699														CDC20	0.784571	0.0323906	0.166667	0.411765	0.573529	1.96892		HLA-DPB1
	NFkB Complex	0.0455817	0	0.160282	0.00023251	0.0857143	0.291811														NDUFAF7	0.350215	0.0754379	0.833333	0.308824	0.397059	1.96487		HLA-DRB1
	pDC	0.0484762	0	0.00759689	0.00822171	0.2	0.264295														NDUFB3	0.493619	0.314109	0.5	0.338235	0.308824	1.95479		IL1B
	Monocyte	0.0138976	0	0.104321	2.6369e-05	0.0571429	0.175388														HLA-DRB1	0.185724	0.00645911	0	0.808824	0.941176	1.94218		MKI67
9		RF	ADB	GB	SVM	NB	Overall		Top 20 Features												IL1B	0.289751	0.0383743	0.166667	0.867647	0.544118	1.90656		NDUFAF7
	Cell Cycle	1	0.833333	1	0.714286	0.942857	4.49048		Alternative Complement Pathway												TMEM126B	0.459078	0.121124	0	0.911765	0.411765	1.90373		NDUFB3
	Pentose Phosphate Signature	0.657222	0.5	0.94536	0.457143	0.0857143	2.64544		Amino Acid Metabolism												CEP55	0.637386	0.20603	0.166667	0.441176	0.441176	1.89244		SLC2A3
	TCA cycle	0.0291708	0.333333	0.0031635	1	1	2.36567		Anergic / Activated T cells												HLA-DPB1	0.173829	0.0124674	0	0.779412	0.911765	1.87747		TMEM126B
	Glycolysis	0.516812	0.333333	0.371191	0.914286	0.142857	2.27848		Anti inflammation												GINS2	0.383887	0.00233942	0	0.661765	0.823529	1.87152		UQCRB
	T Cell	0.153594	0.666667	0.231087	0.4	0.8	2.25135		CD40 Activated B Cell												ASPM	0.0257195	0.0976348	0	0.852941	0.852941	1.82924
	MHC II	0.157496	0.666667	0.0976548	0.428571	0.828571	2.17896		Cell Cycle												IL18R1	0.0202892	0.0164964	0	0.823529	0.955882	1.8162
	Inflammatory_Neutrophil	0.0626402	0.5	0.00341745	0.971429	0.514286	2.05177		Cytotoxic, Activated T Cell												CLC	0.830597	0.10632	0.333333	0.455882	0.0588235	1.78496
	CD40 Activated B Cell	0.242965	0.166667	0.0324593	0.657143	0.914286	2.01352		Dendritic Cell												SOCS3	0.0655725	0.0534014	0	0.926471	0.735294	1.78074
	Anti inflammation	0.283065	1	0.0256524	0.6	0.0571429	1.96586		Fatty Acid Alpha Oxidation												HAAO	0.149662	0.0282127	0	0.720588	0.867647	1.76611
	Fatty Acid Beta Oxidation	0	0.333333	0.00144897	0.885714	0.657143	1.87764		Fatty Acid Beta Oxidation												SLC27A2	0.0103593	0.00115879	0	0.838235	0.897059	1.74681
	Dendritic Cell	0.00299298	0.166667	0.00773714	0.8	0.885714	1.86311		Glycolysis												DNAJC15	0.141204	0.0269593	0	0.617647	0.794118	1.57993
	Plasma Cell	0.3419	0	0.247662	0.228571	0.971429	1.78956		Granulocyte												SLC2A5	0.0409373	0.00578353	0.166667	0.735294	0.617647	1.56633
	IFN	0.0440064	0	0.0305171	0.771429	0.857143	1.70309		IFN												SLC2A1	0.275472	0.00688937	0.166667	0.941176	0.161765	1.55197
	Granulocyte	0.283874	0.166667	0.000651879	0.942857	0.257143	1.65119		Inflammatory_Neutrophil												IL1R1	0.128227	0.00802812	0	0.882353	0.529412	1.54802
	Amino Acid Metabolism	0.244924	0.166667	0.0606877	0.542857	0.485714	1.50085		MHC II												TTC19	0	0	0	0.705882	0.838235	1.54412
	Fatty Acid Alpha Oxidation	0.0596238	0	0.000276035	0.857143	0.542857	1.4599		Pentose Phosphate Signature												PTTG1	0.517036	0.0163249	0	0.485294	0.485294	1.50395
	Proinflammatory IL-1 Family	0.220586	0	0.170358	0.342857	0.685714	1.41952		Plasma Cell												COX20	0.0856439	0.00351038	0	0.794118	0.588235	1.47151
	Cytotoxic, Activated T Cell	0.0526664	0.166667	0.000130096	0.742857	0.428571	1.39089		Proinflammatory IL-1 Family												MCM10	0.525022	0.0318802	0	0.588235	0.323529	1.46867
	Alternative Complement Pathway	0.237681	0.5	0.044	0	0.6	1.38168		T Cell												IL1RAP	0.0568222	0.00877877	0	0.897059	0.5	1.46266
	Anergic / Activated T cells	0.0324338	0	0.00407616	0.571429	0.771429	1.37937		TCA cycle												TKTL1	0.284558	0.0067554	0	0.75	0.382353	1.42367
	Erythrocytes	0.0548057	0	0.033538	0.828571	0.457143	1.37406														NDUFAF5	0.535024	0.119664	0.333333	0.294118	0.102941	1.38508
	Oxidative Phosphorylation	0.0874679	0.5	0.408596	0.142857	0.228571	1.36749														VSIG4	0.240573	0.0315861	0	0.117647	0.985294	1.3751
	Classical Complement Pathway	0.184064	0	0.0872027	0.514286	0.342857	1.12841														IL1RN	0.00864088	0.0390265	0	0.955882	0.352941	1.35649
	Treg	0.0536601	0	0	0.685714	0.371429	1.1108														COA1	0.170975	0.0453454	0	0.573529	0.558824	1.34867
	NK Cell	0.0911458	0.166667	0.0471151	0.0857143	0.714286	1.10493														E2F3	0.310644	0.00134691	0.166667	0.0588235	0.808824	1.3463
	pDC	0.135698	0.166667	0.00457024	0.2	0.571429	1.07836														IL18RAP	0.137166	0.0113075	0.166667	0.0147059	0.970588	1.30043
	Platelets	0.285561	0.166667	0.000711127	0.314286	0.285714	1.05294														CR1	0.278816	0.0076637	0	0.220588	0.720588	1.22766
	TNF	0.000934452	0	2.39138e-05	0.285714	0.742857	1.02953														NDUFS1	0.227609	0.0922386	0.333333	0.367647	0.205882	1.22671
	ROS Protection	0.0298847	0.166667	0.00391366	0.371429	0.4	0.971894														PKM	0.063451	0.0126421	0.166667	0.514706	0.455882	1.21335
	Apoptosis	0.0260963	0	0.000109243	0.628571	0.114286	0.769063														C5	0.0598429	0.00397396	0	0.382353	0.75	1.19617
	LDG	0.0426302	0.166667	0.000315691	0.485714	0.0285714	0.723898														TRAP1	0.291384	0.0022696	0	0.235294	0.632353	1.1613
	Monocyte	0.0538667	0	2.21674e-06	0.0285714	0.628571	0.711012														PRPS2	0.137805	0.00831057	0	0.529412	0.470588	1.14612
	NFkB Complex	0.0497508	0.166667	6.13939e-05	0.0571429	0.314286	0.587907														TYMS	0.107764	0.00253017	0.166667	0.602941	0.25	1.1299
	Unfolded Protein	0.042922	0.166667	0.000326122	0.171429	0.171429	0.552772														HLA-DQA1	0.0643985	0.004391	0	0.0294118	0.926471	1.02467
	Tactivated	0.0354233	0.166667	0.00833939	0.257143	0	0.467572														NDUFA5	0.438479	0.0190783	0	0.279412	0.279412	1.01638
	NLRP3 Inflammasome	0.00676001	0	0.00942914	0.114286	0.2	0.330475														CXCR2	0.157319	0.00265449	0	0.0441177	0.764706	0.968797
10		RF	DTREE	GB	SVM	NB	Overall		Top 20 Features												COX11	0.125503	0.0114381	0	0.647059	0.147059	0.931059
	Cell Cycle	1	1	0.876796	0.714286	0.885714	4.4768		Alternative Complement Pathway												H6PD	0.192833	0.0280227	0	0.691176	0.0147059	0.926738
	Pentose Phosphate Signature	0.692698	0.112921	1	0.457143	0.514286	2.77705		Amino Acid Metabolism												NDUFA2	0.274641	0.0188787	0	0.544118	0.0882353	0.925873
	Glycolysis	0.496604	0.605591	0.409556	0.914286	0.314286	2.74032		Anergic / Activated T cells												CYCS	0.0336416	0.00699724	0	0.102941	0.779412	0.922992
	Granulocyte	0.209276	0	3.13822e-06	0.942857	0.971429	2.12357		Anti inflammation												RETN	0.241779	0.00692705	0	0.470588	0.132353	0.851647
	Anti inflammation	0.434781	0	0.129432	0.6	0.914286	2.0785		CD40 Activated B Cell												OSM	0.279564	0.036244	0.166667	0.176471	0.191176	0.850122
	TCA cycle	0.0684794	0.0778959	2.9515e-06	1	0.714286	1.86066		Cell Cycle												PFKFB2	0.328622	0.0178373	0.166667	0.147059	0.176471	0.836656
	Alternative Complement Pathway	0.406283	0.335992	0.228706	0	0.857143	1.82812		Classical Complement Pathway												PGD	0.238392	0.0180257	0	0.5	0.0735294	0.829947
	Cytotoxic, Activated T Cell	0.0591859	0	0.00021002	0.742857	0.942857	1.74511		Cytotoxic, Activated T Cell												PFKFB3	0.168804	0.0155634	0	0.132353	0.426471	0.743191
	Classical Complement Pathway	0.0913176	0.367991	0.03585	0.514286	0.628571	1.63802		Erythrocytes												MCM2	0.236796	0.0279688	0	0.0735294	0.338235	0.676529
	Fatty Acid Alpha Oxidation	0.0437868	0	0.00688841	0.857143	0.685714	1.59353		Fatty Acid Alpha Oxidation												BRCA1	0.181455	0.00627537	0	0.205882	0.235294	0.628907
	CD40 Activated B Cell	0.225307	0	0.217331	0.657143	0.485714	1.58549		Glycolysis												AURKA	0.31059	0.0344817	0	0	0.264706	0.609778
	Oxidative Phosphorylation	0.0493855	0	0.423235	0.142857	0.828571	1.44405		Granulocyte												NDUFB6	0.0969728	0.00630159	0	0.352941	0.117647	0.573863
	Inflammatory_Neutrophil	0.127059	0	0.00351495	0.971429	0.285714	1.38772		IFN												SLC25A4	0.0169093	0.00261667	0	0.161765	0.294118	0.475408
	Anergic / Activated T cells	0.124621	0	0	0.571429	0.657143	1.35319		Inflammatory_Neutrophil												CTSS	0.169192	0.00459663	0	0.191176	0.0294118	0.394377
	Amino Acid Metabolism	0.0658726	0	0.0989006	0.542857	0.6	1.30763		Oxidative Phosphorylation												CFH	0.0427133	0.00340106	0	0.264706	0	0.31082
	ROS Protection	0.0839792	0	0.108056	0.371429	0.742857	1.30632		Pentose Phosphate Signature												SLC2A4	0.0804869	0.0176078	0	0.0882353	0.0441177	0.230448
	Tactivated	0.0304841	0	0.0054626	0.257143	1	1.29309		Proinflammatory IL-1 Family													LR	RF	DTREE	ADB	SVM	Overall		Top 20 Genes
	Erythrocytes	0.0865223	0	0.000143033	0.828571	0.342857	1.25809		ROS Protection												COX7B	0.956712	0.751758	1	0.571429	0.397059	3.67696		CCNB2
	Proinflammatory IL-1 Family	0.23456	0	0.255311	0.342857	0.4	1.23273		Tactivated												SLC2A3	0.421102	0.497398	0	1	0.514706	2.43321		CD177
	IFN	0.1149	0	0.105389	0.771429	0.228571	1.22029		TCA cycle												UQCRB	0.947461	0.534038	0	0	0.911765	2.39326		CDC20
	MHC II	0.145384	0	0.091541	0.428571	0.542857	1.20835														COX6C	0.648248	1	0	0.142857	0.441176	2.23228		CEP55
	Apoptosis	0.0384211	0	0.00179161	0.628571	0.428571	1.09736														COX7C	0.530142	0.452863	0	0.142857	0.926471	2.05233		CLC
	Platelets	0.197913	0	0.00340284	0.314286	0.571429	1.08703														NDUFAF7	0.369118	0.0834466	0.173787	0.428571	0.941176	1.9961		COX6C
	Plasma Cell	0.383744	0	0.299757	0.228571	0.142857	1.05493														MKI67	0.672075	0.214859	0.0271986	0.285714	0.794118	1.99396		COX7B
	pDC	0.0621802	0	0.0122976	0.2	0.771429	1.04591														CCNB2	1	0.271668	0	0.428571	0.161765	1.862		COX7C
	Unfolded Protein	0.164006	0	0.007761	0.685714	0.171429	1.02891														CD177	0.672373	0.0481143	0	0.142857	0.985294	1.84864		IL18RAP
	Fatty Acid Beta Oxidation	0.019365	0	0.0158242	0.885714	0.0571429	0.978046														CEP55	0.551776	0.159044	0	0.285714	0.647059	1.64359		IL1R1
	Dendritic Cell	0.0317114	0	0.00325837	0.8	0.114286	0.949256														OSM	0.266376	0.0281112	0	0.428571	0.779412	1.50247		MCM10
	Monocyte	0	0	0.00294021	0.0285714	0.8	0.831512														MCM10	0.539849	0.095362	0	0.142857	0.705882	1.48395		MKI67
	LDG	0.0342865	0	0.00686142	0.485714	0.257143	0.784005														CDC20	0.820562	0.0234262	0	0.142857	0.382353	1.3692		NDUFA2
	Treg	0.0462149	0.0403389	5.13549e-07	0.285714	0.371429	0.743697														NDUFA2	0.29395	0.0240752	0	0.285714	0.75	1.35374		NDUFAF7
	NFkB Complex	0.101686	0	0.000929406	0.0571429	0.457143	0.616901														CLC	0.756863	0.093255	0	0.428571	0.0441177	1.32281		NDUFB3
	T Cell	0.112467	0	0.0069907	0.4	0.0857143	0.605172														PFKFB2	0.320461	0.0139125	0	0	0.955882	1.29026		OSM
	NK Cell	0.0531479	0.160176	0.132766	0.0857143	0.0285714	0.460375														IL1R1	0.253328	0.0124116	0	0.142857	0.867647	1.27624		PFKFB2
	NLRP3 Inflammasome	0.0276373	0	0.00929166	0.114286	0.2	0.351215														NDUFB3	0.49372	0.25009	0	0.428571	0.0588235	1.23121		SLC2A3
	TNF	0.0625849	0	0.054565	0.171429	0	0.288579														IL18RAP	0.142237	0.0338456	0	0.142857	0.897059	1.216		TMEM126B
																					TMEM126B	0.449868	0.085452	0	0	0.661765	1.19708		UQCRB
																					CXCR2	0.144774	0.00887689	0	0	1	1.15365
																					TRAP1	0.261633	0.00386611	0	0.142857	0.691176	1.09953
																					NDUFS1	0.227588	0.0572102	0	0	0.808824	1.09362
																					IL1B	0.259325	0.0490905	0	0.142857	0.617647	1.06892
																					PFKFB3	0.187217	0.018169	0	0	0.838235	1.04362
																					GINS2	0.406471	0.0140891	0	0	0.602941	1.0235
																					COX11	0.174695	0.00851922	0	0.142857	0.676471	1.00254
																					TTC19	0.0146669	0.00237287	0	0	0.970588	0.987628
																					NDUFA5	0.455225	0.0319765	0	0	0.470588	0.95779
																					NDUFAF5	0.501731	0.118933	0	0.142857	0.191176	0.954698
																					IL18R1	0.0158226	0.00483984	0	0	0.882353	0.903015
																					CFH	0.0356991	0.00202725	0	0	0.852941	0.890668
																					NDUFB6	0.103758	0.0166956	0	0	0.764706	0.88516
																					IL1RAP	0.0487797	0.0109351	0	0	0.823529	0.883244
																					CCNB1	0.437306	0.234513	0	0	0.205882	0.877701
																					TKTL1	0.233552	0.00254438	0	0	0.632353	0.868449
																					PRPS2	0.146567	0	0	0	0.720588	0.867156
																					COX20	0.0750684	0.0344358	0	0	0.735294	0.844798
																					PTTG1	0.492459	0.0140122	0	0	0.338235	0.844706
																					CR1	0.253084	0.0155205	0.0271911	0	0.544118	0.839914
																					E2F3	0.347587	0.00096846	0	0.142857	0.323529	0.814942
																					AURKA	0.295889	0.0208536	0	0	0.455882	0.772625
																					SOCS3	0.0974789	0.0743219	0	0	0.588235	0.760036
																					DNAJC15	0.14808	0.018104	0	0	0.573529	0.739713
																					H6PD	0.190564	0.00988287	0	0	0.529412	0.729859
																					HAAO	0.156054	0.0468528	0	0.142857	0.367647	0.713411
																					RETN	0.236239	0.00270364	0	0	0.352941	0.591884
																					PKM	0.0678724	0.0207347	0	0	0.5	0.588607
																					C3	0.136188	0.0319135	0	0.285714	0.132353	0.586169
																					SLC2A5	0.0182094	0	0	0	0.558824	0.577033
																					PGD	0.254838	0.00905441	0	0	0.308824	0.572716
																					MCM2	0.249769	0.0271936	0	0	0.294118	0.571081
																					SLC27A2	0.0517446	0.00106054	0	0	0.485294	0.538099
																					COA1	0.202237	0.00829586	0	0.285714	0.0294118	0.525659
																					SLC2A1	0.252325	0.00126389	0	0.142857	0.0735294	0.469976
																					C5	0.034335	0.00323202	0	0	0.426471	0.464038
																					HLA-DQA1	0.0208333	0.0017217	0	0	0.411765	0.43432
																					BRCA1	0.155491	0.00256357	0	0	0.264706	0.42276
																					HLA-DRB1	0.232952	0.0122445	0	0	0.176471	0.421667
																					HLA-DPB1	0.138223	0.0118275	0	0	0.235294	0.385345
																					ASPM	0.0391302	0.0748307	0	0	0.25	0.363961
																					VSIG4	0.235901	0.0200146	0	0	0.102941	0.358857
																					HLA-DMA	0.270941	0.00185287	0	0	0.0147059	0.2875
																					SLC25A4	0.00069004	0.00255689	0	0	0.279412	0.282659
																					CYCS	0.0512076	0.00671705	0	0	0.220588	0.278513
																					TYMS	0.124539	0.00577326	0	0	0.117647	0.247959
																					SLC2A4	0	0.01246	0	0	0.147059	0.159519
																					CTSS	0.143617	0.00610907	0	0	0	0.149726
																					IL1RN	0.00238562	0.0214169	0	0	0.0882353	0.112038
																						LR	RF	ADB	GB	SVM	Overall		Top 20 Genes
																					COX6C	0.607419	1	0.125	0.634757	0.676471	3.04365		CCNB2
																					SLC2A3	0.431045	0.574601	1	0.112456	0.705882	2.82399		CD177
																					COX7C	0.525541	0.422528	0.125	1	0.735294	2.80836		CDC20
																					COX7B	0.929977	0.624743	0.375	7.26e-07	0.691176	2.6209		CEP55
																					UQCRB	0.945567	0.454089	0	0.199938	0.911765	2.51136		CLC
																					CLC	0.79361	0.132622	0.5	1.12e-17	0.588235	2.01447		COX6C
																					CCNB2	1	0.240432	0.25	1.12e-17	0.455882	1.94631		COX7B
																					NDUFAF7	0.345293	0.0884976	0.5	0.235128	0.485294	1.65421		COX7C
																					CDC20	0.814894	0.027548	0.125	0.0001412	0.544118	1.5117		E2F3
																					CEP55	0.558958	0.141719	0.125	9.18e-05	0.558824	1.38459		GINS2
																					GINS2	0.348988	0.00302016	0.125	1.12e-17	0.838235	1.31524		HAAO
																					MKI67	0.65885	0.186857	0.375	0.00768687	0.0735294	1.30192		HLA-DMA
																					HLA-DMA	0.275976	0.00195669	0.125	1.12e-17	0.897059	1.29999		HLA-DRB1
																					CD177	0.694561	0.066394	0	0.00067324	0.529412	1.29104		MKI67
																					NDUFB3	0.475989	0.182557	0.375	0.00814328	0.205882	1.24757		NDUFAF5
																					E2F3	0.277157	0.0014881	0.125	0.0135231	0.823529	1.2407		NDUFAF7
																					NDUFAF5	0.548639	0.130435	0.375	0.00273693	0.176471	1.23328		NDUFB3
																					HAAO	0.136647	0.0395375	0.125	1.95e-07	0.882353	1.18354		SLC2A1
																					HLA-DRB1	0.18991	0.00711604	0	1.12e-17	0.970588	1.16761		SLC2A3
																					SLC2A1	0.275382	0.00453411	0	1.12e-17	0.852941	1.13286		UQCRB
																					HLA-DPB1	0.14282	0.0176708	0	1.12e-17	0.941176	1.10167
																					CR1	0.298674	0.0236334	0	3.24e-10	0.75	1.07231
																					TYMS	0.073956	0.00332106	0	0.00135384	0.985294	1.06393
																					NDUFB6	0.0361407	0.00999136	0	1.12e-17	1	1.04613
																					H6PD	0.159425	0.0134597	0	4.36e-09	0.867647	1.04053
																					HLA-DQA1	0.0586511	0.016692	0	0.00561625	0.955882	1.03684
																					PTTG1	0.450518	0.0288867	0.25	1.12e-17	0.279412	1.00882
																					SLC2A5	0.0487174	0	0	1.12e-17	0.926471	0.975188
																					DNAJC15	0.14639	0.0145159	0	1.12e-17	0.808824	0.969729
																					IL1B	0.297055	0.0260614	0.125	0.0005184	0.5	0.948635
																					CXCR2	0.138154	0.02145	0	2.17e-10	0.779412	0.939016
																					CTSS	0.143901	0.0105422	0	0.00014379	0.764706	0.919293
																					ASPM	0.0504348	0.0844677	0.125	3.95e-10	0.647059	0.906961
																					CCNB1	0.455824	0.151921	0	9.08e-05	0.264706	0.872541
																					NDUFS1	0.209971	0.0486296	0.125	0.00168687	0.470588	0.855876
																					CYCS	0.0142919	0.00015926	0	1.77e-08	0.794118	0.808569
																					OSM	0.244963	0.0150957	0.25	1.56e-05	0.294118	0.804192
																					COA1	0.170885	0.00792207	0	1.12e-17	0.617647	0.796455
																					COX20	0.118199	0.00965315	0	1.18e-08	0.661765	0.789617
																					COX11	0.119905	0.0183778	0	0	0.632353	0.770635
																					IL18R1	0.0268144	0.0189536	0	1.12e-17	0.720588	0.766356
																					SLC2A4	0.0490603	0.0264006	0	0.0166467	0.602941	0.695049
																					IL18RAP	0.158134	0.0202998	0	1.12e-17	0.514706	0.69314
																					PGD	0.238534	0.0129876	0	1.12e-17	0.441176	0.692698
																					PFKFB2	0.352864	0.0111752	0	1.12e-17	0.308824	0.672863
																					C3	0.110832	0.0268182	0.125	0.0103038	0.397059	0.670013
																					NDUFA2	0.272924	0.00446453	0.25	1.12e-17	0.132353	0.659741
																					TKTL1	0.292321	0.00198903	0.25	1.12e-17	0.102941	0.647252
																					MCM10	0.501836	0.0988355	0	7.45e-06	0.0441177	0.644796
																					RETN	0.249986	0.00688814	0	0.00622769	0.352941	0.616043
																					CFH	0.0344419	0.00119355	0	1.12e-17	0.573529	0.609165
																					TMEM126B	0.436535	0.076937	0	1.12e-17	0.0882353	0.601708
																					BRCA1	0.158657	0.00374886	0	1.12e-17	0.426471	0.588876
																					PRPS2	0.159748	0.00557067	0	1.12e-17	0.411765	0.577084
																					NDUFA5	0.392276	0.0117119	0	2.69e-08	0.147059	0.551047
																					VSIG4	0.250681	0.0467799	0	0.00652573	0.235294	0.539281
																					PFKFB3	0.142108	0.0159059	0	0.00075103	0.323529	0.482295
																					PKM	0.0873344	0.0170407	0	1.12e-17	0.338235	0.44261
																					C5	0.0367353	0.00281384	0	1.12e-17	0.382353	0.421902
																					SOCS3	0.0983747	0.0563881	0	1.12e-17	0.25	0.404763
																					SLC25A4	0.0245406	0	0	5.4e-05	0.367647	0.392242
																					TRAP1	0.260206	0.00480302	0	0.00364575	0.117647	0.386302
																					IL1R1	0.176716	0.00242169	0	1.12e-17	0.191176	0.370314
																					MCM2	0.260472	0.00784163	0	1.12e-17	0.0588235	0.327138
																					AURKA	0.253741	0.00558665	0	0.00469704	0	0.264025
																					SLC27A2	0.0371489	0	0	1.12e-17	0.220588	0.257737
																					TTC19	0	0.0133584	0	1.12e-17	0.161765	0.175123
																					IL1RN	0.0579308	0.0349344	0	0.0210918	0.0294118	0.143369
																					IL1RAP	0.0504191	0.00832121	0	3.57e-09	0.0147059	0.0734462
																						LR	RF	ADB	SVM	NB	Overall		Top 20 Genes
																					COX7B	0.943515	0.725752	0.25	0.838235	0.676471	3.43397		C3
																					COX7C	0.557665	0.519147	0.25	0.867647	0.823529	3.01799		CCNB2
																					SLC2A3	0.423558	0.526242	0.625	0.514706	0.705882	2.79539		CD177
																					CLC	0.829027	0.147907	0.375	0.485294	0.911765	2.74899		CEP55
																					COX6C	0.645835	1	0.375	0.661765	0.0441177	2.72672		CLC
																					UQCRB	0.985168	0.524039	0.125	0.117647	0.647059	2.39891		COX20
																					CEP55	0.623195	0.11732	0.25	0.411765	0.867647	2.26993		COX6C
																					CCNB2	1	0.299657	0.25	0.102941	0.602941	2.25554		COX7B
																					CD177	0.651225	0.0745133	0	0.985294	0.264706	1.97574		COX7C
																					MKI67	0.661051	0.203478	0.25	0.720588	0.117647	1.95276		CR1
																					C3	0.119729	0.0440592	0.375	0.397059	1	1.93585		CXCR2
																					MCM10	0.500794	0.102548	0	0.897059	0.397059	1.89746		HLA-DPB1
																					CXCR2	0.164917	0.060102	0	0.941176	0.661765	1.82796		HLA-DQA1
																					NDUFB3	0.481991	0.179323	0.75	0.0735294	0.338235	1.82308		HLA-DRB1
																					COX20	0.0805666	0.00299037	0	0.705882	0.970588	1.76003		MCM10
																					TMEM126B	0.449274	0.127204	0	0.544118	0.632353	1.75295		MKI67
																					HLA-DPB1	0.155134	0.0352314	0	0.75	0.808824	1.74919		NDUFB3
																					HLA-DQA1	0.04815	0.00947312	0	0.970588	0.720588	1.7488		SLC2A3
																					CR1	0.268439	0.0194819	0	0.882353	0.544118	1.71439		TMEM126B
																					HLA-DRB1	0.179853	0.0136838	0	0.691176	0.794118	1.67883		UQCRB
																					CTSS	0.17093	0.00652473	0	0.926471	0.558824	1.66275
																					NDUFAF7	0.357884	0.083192	1	0.0588235	0.147059	1.64696
																					MCM2	0.245102	0.0221	0	0.955882	0.308824	1.53191
																					VSIG4	0.292209	0.00916262	0	0.235294	0.985294	1.52196
																					GINS2	0.410111	0.0135848	0.125	0.0147059	0.941176	1.50458
																					ASPM	0.0224139	0.0776462	0	0.647059	0.75	1.49712
																					NDUFAF5	0.516468	0.130221	0.125	0.588235	0.132353	1.49228
																					CCNB1	0.466125	0.319193	0	0.323529	0.367647	1.47649
																					TRAP1	0.279668	0.0051417	0.25	0.0882353	0.838235	1.46128
																					HLA-DMA	0.251396	0.00333615	0	0.25	0.926471	1.4312
																					HAAO	0.150478	0.0468174	0	0.441176	0.779412	1.41788
																					PFKFB2	0.319281	0.00374365	0	0.191176	0.897059	1.41126
																					E2F3	0.296482	0	0.125	0.0294118	0.955882	1.40678
																					C5	0.0347996	0.00232505	0	0.735294	0.588235	1.36065
																					CYCS	0.0236302	0.0020528	0	0.558824	0.735294	1.3198
																					TKTL1	0.329895	0.00327209	0	0.132353	0.852941	1.31846
																					IL1RAP	0.0697771	0.00690966	0	0.808824	0.426471	1.31198
																					PTTG1	0.497673	0.0110007	0	0.352941	0.441176	1.30279
																					TYMS	0.101831	0.0107695	0	0.911765	0.25	1.27437
																					SLC2A4	0.105679	0.00888055	0	0.529412	0.617647	1.26162
																					IL1R1	0.165473	0.00455344	0	0.632353	0.455882	1.25826
																					NDUFA2	0.272369	0.0148813	0	0.617647	0.352941	1.25784
																					CDC20	0.727998	0.0345016	0	0.294118	0.176471	1.23309
																					BRCA1	0.16381	0.00061201	0	0.852941	0.205882	1.22325
																					NDUFA5	0.42394	0.0187397	0	0.5	0.279412	1.22209
																					PRPS2	0.141551	0.00299978	0	1	0.0735294	1.21808
																					IL1B	0.287605	0.0658599	0	0.779412	0.0588235	1.1917
																					H6PD	0.191332	0.0113611	0	0.205882	0.764706	1.17328
																					SLC27A2	0.016545	0.00349575	0	0.455882	0.691176	1.1671
																					OSM	0.256539	0.00821758	0.5	0.176471	0.220588	1.16182
																					AURKA	0.304229	0.0478723	0	0.264706	0.529412	1.14622
																					DNAJC15	0.129818	0.0341931	0	0.0441177	0.882353	1.09048
																					RETN	0.196665	0.00565836	0	0.367647	0.514706	1.08468
																					COA1	0.167028	0.00793055	0	0.794118	0.102941	1.07202
																					TTC19	0	0.00835895	0	0.602941	0.411765	1.02306
																					PFKFB3	0.173017	0.0107589	0	0.220588	0.573529	0.977893
																					IL18RAP	0.159852	0.0109304	0	0.764706	0.0294118	0.9649
																					IL1RN	0.0258246	0.0101735	0	0.823529	0.0882353	0.947763
																					CFH	0.0620277	0.00341622	0	0.382353	0.470588	0.918385
																					SLC25A4	0.00210392	0.0032171	0	0.426471	0.485294	0.917086
																					SLC2A1	0.277959	0.0005516	0.125	0.470588	0	0.874099
																					NDUFS1	0.218727	0.0687511	0.125	0.161765	0.294118	0.86836
																					COX11	0.146507	0.0149628	0	0.676471	0.0147059	0.852646
																					PGD	0.23766	0.00196763	0	0.279412	0.323529	0.842569
																					SOCS3	0.0708413	0.0242942	0	0.338235	0.382353	0.815724
																					SLC2A5	0.0304505	0.00438304	0	0.573529	0.161765	0.770128
																					PKM	0.0588986	0.00933282	0	0.308824	0.235294	0.612349
																					IL18R1	0.0411603	0.0120804	0	0	0.5	0.553241
																					NDUFB6	0.101844	0.00195875	0	0.147059	0.191176	0.442038
																						LR	RF	ADB	LDA	SVM	Overall		Top 20 Genes
																					COX7B	0.952802	0.758221	0.666667	0.393356	0.764706	3.53575		CCNB2
																					SLC2A3	0.407132	0.520469	1	0.661762	0.779412	3.36877		CDC20
																					COX6C	0.6431	1	0.166667	0.380815	0.75	2.94058		CEP55
																					NDUFB3	0.497754	0.262807	0.833333	0.640027	0.397059	2.63098		CLC
																					CCNB2	0.93383	0.318038	0.333333	0.293635	0.588235	2.46707		COX6C
																					COX7C	0.57562	0.466504	0.5	0.103493	0.794118	2.43974		COX7B
																					UQCRB	1	0.545745	0	0.671751	0.102941	2.32044		COX7C
																					E2F3	0.298694	0	0	1	0.897059	2.19575		E2F3
																					NDUFAF7	0.355259	0.0734295	1	0.244531	0.308824	1.98204		GINS2
																					TMEM126B	0.447902	0.0773942	0	0.853375	0.5	1.87867		HAAO
																					HAAO	0.141799	0.058096	0.5	0.125763	0.955882	1.78154		MKI67
																					CLC	0.861997	0.108324	0	0.0924875	0.676471	1.73928		NDUFAF5
																					TTC19	0	0.00704155	0	0.817989	0.911765	1.73679		NDUFAF7
																					OSM	0.260442	0.024275	0.666667	0.379968	0.367647	1.699		NDUFB3
																					MKI67	0.704652	0.22049	0.166667	0.31369	0.264706	1.6702		OSM
																					CDC20	0.730882	0.0246167	0.166667	0.108645	0.632353	1.66316		PTTG1
																					PTTG1	0.605844	0.00786087	0.166667	0.126056	0.691176	1.5976		SLC2A3
																					NDUFAF5	0.49498	0.133392	0.333333	0.3623	0.205882	1.52989		TMEM126B
																					CEP55	0.639898	0.195067	0	0.0401408	0.647059	1.52216		TTC19
																					GINS2	0.43871	0.00957704	0	0.140233	0.926471	1.51499		UQCRB
																					CCNB1	0.463503	0.214057	0.166667	0.0905112	0.558824	1.49356
																					CD177	0.726583	0.0844223	0	0.0496923	0.617647	1.47834
																					HLA-DMA	0.198043	0.017965	0.333333	0.143747	0.735294	1.42838
																					AURKA	0.356788	0.115216	0.166667	0.261473	0.470588	1.37073
																					CR1	0.229321	0.0132327	0	0.307149	0.808824	1.35853
																					SOCS3	0.062168	0.0112802	0	0.356205	0.867647	1.2973
																					COA1	0.173664	0.0490648	0	0.335068	0.705882	1.26368
																					CTSS	0.207737	0.0025935	0	0.222447	0.823529	1.25631
																					H6PD	0.198232	0.00852375	0	0.083118	0.941176	1.23105
																					NDUFA5	0.418852	0.0243491	0	0.438495	0.294118	1.17581
																					DNAJC15	0.117723	0.0113558	0	0.0956241	0.882353	1.10706
																					CXCR2	0.201254	0.0373159	0	0.028525	0.838235	1.10533
																					HLA-DQA1	0.0732557	0.0002482	0	0	1	1.0735
																					MCM2	0.254728	0.0182248	0	0.36594	0.426471	1.06536
																					PKM	0.03172	0.00274657	0	0.0549861	0.970588	1.06004
																					SLC25A4	0.0348203	0.00390888	0	0.00586392	0.985294	1.02989
																					CYCS	0.0252436	0.00477308	0	0.139037	0.852941	1.022
																					C3	0.130499	0.0473324	0.166667	0.13408	0.514706	0.993283
																					IL1B	0.294677	0.0441052	0.166667	0.440365	0.0441177	0.989931
																					CFH	0.133772	0.0141806	0	0.135799	0.661765	0.945517
																					NDUFA2	0.301422	0.0166984	0.166667	0.148015	0.279412	0.912214
																					MCM10	0.492386	0.093649	0	0.1208	0.191176	0.898011
																					SLC2A4	0.139418	0.0165155	0	0.189305	0.544118	0.889356
																					COX11	0.187124	0.0139136	0	0.220193	0.455882	0.877113
																					RETN	0.0958349	0.00196939	0	0.137725	0.602941	0.838471
																					COX20	0.0580804	0.00493435	0	0.0528095	0.720588	0.836413
																					PFKFB2	0.356286	0.012581	0	0.0885129	0.338235	0.795615
																					NDUFS1	0.239616	0.0600017	0	0.171989	0.323529	0.795136
																					BRCA1	0.137503	0	0	0.125794	0.485294	0.748591
																					C5	0.0272769	0.00348617	0	0.127849	0.529412	0.688024
																					PFKFB3	0.189338	0.0112464	0	0.126847	0.352941	0.680372
																					SLC2A5	0.0417347	0.006192	0	0.0537062	0.573529	0.675162
																					TKTL1	0.342565	0.00261447	0	0.0829918	0.220588	0.648759
																					VSIG4	0.307472	0.0106707	0	0.0661362	0.235294	0.619573
																					TRAP1	0.307595	0.00908495	0.166667	0.0424587	0.0882353	0.61404
																					PGD	0.201734	0.00849206	0.166667	0.0588571	0.161765	0.597515
																					HLA-DPB1	0.123175	0.0106784	0	0.0209646	0.441176	0.595995
																					PRPS2	0.148991	0.00594291	0	0.167954	0.25	0.572888
																					SLC2A1	0.267027	0.00799571	0	0.150333	0.132353	0.557708
																					NDUFB6	0.111273	0.00525693	0	0.0284175	0.382353	0.5273
																					HLA-DRB1	0.0974194	0.00488477	0	0.0038658	0.411765	0.517935
																					IL1R1	0.197272	0.00400447	0.166667	0.0895927	0.0588235	0.516359
																					IL1RN	0.0615849	0.0170359	0.166667	0.0483156	0.176471	0.470074
																					IL18RAP	0.164431	0.00729957	0	0.136186	0.0294118	0.337329
																					IL18R1	0.011994	0.0173388	0	0.240139	0.0147059	0.284178
																					IL1RAP	0.0580386	0.00516294	0	0.0534692	0.147059	0.26373
																					TYMS	0.0774893	0.00391964	0	0.0115562	0.117647	0.210612
																					SLC27A2	0.00398165	0	0	0.0895351	0.0735294	0.167046
																					ASPM	0.0289497	0.049047	0	0.0315811	0	0.109578
																						LR	RF	ADB	SVM	NB	Overall		Top 20 Genes
																					COX6C	0.597465	1	0.25	0.897059	0.779412	3.52394		AURKA
																					COX7B	0.876876	0.691716	0.375	0.455882	0.794118	3.19359		CCNB1
																					UQCRB	0.925014	0.534261	0	0.970588	0.647059	3.07692		CCNB2
																					SLC2A3	0.415766	0.564154	1	0.132353	0.852941	2.96521		CD177
																					CCNB2	1	0.372273	0.375	0.426471	0.514706	2.68845		CDC20
																					CEP55	0.618599	0.199546	0.25	0.955882	0.558824	2.58285		CEP55
																					COX7C	0.531083	0.477246	0.125	0.441176	0.808824	2.38333		CLC
																					NDUFB3	0.481501	0.319751	0.375	0.720588	0.352941	2.24978		COX6C
																					PTTG1	0.463184	0.00763557	0.25	0.941176	0.573529	2.23553		COX7B
																					AURKA	0.272152	0.0300597	0	0.985294	0.911765	2.19927		COX7C
																					NDUFAF7	0.327081	0.08698	0.5	0.926471	0.338235	2.17877		CR1
																					CCNB1	0.4261	0.19894	0	1	0.470588	2.09563		GINS2
																					CDC20	0.741138	0.0202749	0.125	0.661765	0.544118	2.0923		MKI67
																					GINS2	0.338196	0.00362932	0.125	0.529412	0.970588	1.96682		NDUFAF7
																					MKI67	0.689833	0.208009	0.125	0.602941	0.308824	1.93461		NDUFB3
																					CR1	0.286685	0.00642511	0	0.808824	0.823529	1.92546		PFKFB2
																					CD177	0.616929	0.13744	0.125	0.470588	0.529412	1.87937		PTTG1
																					PFKFB2	0.29825	0.00793022	0	0.632353	0.897059	1.83559		SLC2A1
																					SLC2A1	0.251568	0.0161402	0.125	0.764706	0.632353	1.78977		SLC2A3
																					CLC	0.790073	0.109025	0.25	0.0294118	0.602941	1.78145		UQCRB
																					VSIG4	0.199416	0.0275567	0	0.558824	0.985294	1.77109
																					TMEM126B	0.416798	0.0804125	0	0.838235	0.382353	1.7178
																					COX20	0.0768267	0.00609223	0	0.882353	0.75	1.71527
																					MCM10	0.446485	0.028213	0	0.823529	0.397059	1.69529
																					H6PD	0.174863	0.0147691	0	0.735294	0.764706	1.68963
																					SOCS3	0.0773364	0.0566379	0	0.691176	0.838235	1.66339
																					PKM	0.0568623	0	0	0.867647	0.691176	1.61569
																					OSM	0.274972	0.0261633	0.25	0.75	0.294118	1.59525
																					E2F3	0.286634	0.00234421	0	0.264706	0.955882	1.50957
																					PGD	0.252472	0.00810816	0	0.161765	1	1.42234
																					HLA-DMA	0.278677	0.00885493	0	0.617647	0.5	1.40518
																					TTC19	0.0102719	0.0121369	0	0.705882	0.676471	1.40476
																					SLC2A5	0.0645863	0.00736825	0	0.794118	0.485294	1.35137
																					CTSS	0.110534	0	0	0.367647	0.867647	1.34583
																					NDUFS1	0.201567	0.0888438	0.125	0.911765	0.0147059	1.34188
																					DNAJC15	0.157565	0.0533668	0	0.176471	0.941176	1.32858
																					MCM2	0.219269	0.019104	0.25	0.588235	0.205882	1.28249
																					C3	0.126668	0.0351541	0.25	0.411765	0.441176	1.26476
																					COA1	0.167246	0.00585601	0	0.397059	0.661765	1.23193
																					COX11	0.104586	0.0110745	0	0.382353	0.720588	1.2186
																					CYCS	0	0.0115518	0	0.279412	0.926471	1.21743
																					PFKFB3	0.15836	0.00746024	0	0.338235	0.705882	1.20994
																					HLA-DRB1	0.158098	0.00066392	0	0.852941	0.176471	1.18817
																					SLC27A2	0.0428415	0	0	0.5	0.617647	1.16049
																					IL18RAP	0.103022	0.0118843	0.125	0.779412	0.132353	1.15167
																					TRAP1	0.248586	0.00509792	0.25	0.235294	0.411765	1.15074
																					NDUFA5	0.400554	0.00847625	0	0.647059	0.0441177	1.10021
																					HAAO	0.160277	0.0273572	0.25	0.205882	0.426471	1.06999
																					NDUFAF5	0.51901	0.140942	0.25	0.102941	0.0294118	1.0423
																					HLA-DPB1	0.188241	0.0156065	0	0.544118	0.279412	1.02738
																					TKTL1	0.265978	0.00649908	0	0.573529	0.161765	1.00777
																					CXCR2	0.0992831	0.00803929	0	0	0.882353	0.989675
																					PRPS2	0.131383	0.00116448	0	0.485294	0.323529	0.941371
																					BRCA1	0.180898	0	0	0.0147059	0.735294	0.930898
																					SLC2A4	0.0766493	0.0178768	0	0.514706	0.264706	0.873938
																					RETN	0.226477	0	0	0.352941	0.235294	0.814712
																					IL1B	0.236908	0.0277218	0.125	0.294118	0.117647	0.801395
																					ASPM	0.00274003	0.0693877	0	0.676471	0	0.748598
																					C5	0.0660363	0.00266388	0	0.147059	0.455882	0.671641
																					CFH	0.0233347	0.00510238	0	0.0441177	0.588235	0.66079
																					NDUFB6	0.0665246	0.00623525	0	0.191176	0.367647	0.631583
																					IL1R1	0.121101	0.00976105	0	0.308824	0.102941	0.542627
																					HLA-DQA1	0.033403	0.00792651	0	0.25	0.191176	0.482506
																					TYMS	0.0892665	0.00204642	0	0.117647	0.25	0.45896
																					IL1RN	0.00687842	0.0242431	0	0.323529	0.0735294	0.42818
																					NDUFA2	0.247079	0.0194317	0	0.0735294	0.0588235	0.398864
																					IL18R1	0.0142664	0.0125651	0	0.220588	0.147059	0.394479
																					SLC25A4	0.0506871	0.00251261	0	0.0882353	0.220588	0.362023
																					IL1RAP	0.0633402	0.00470869	0	0.0588235	0.0882353	0.215108

## Sheet: Non-critical COVID vs Healthy
	Machine Learning Round 1										Machine Learning Round 2										Machine Learning Round 3
1		LR	RF	LDA	GB	SVM	Overall		Top 20 Features			RF	ADB	LDA	GB	SVM	Overall		Top 10 Features			LR	RF	ADB	GB	SVM	Overall		Top 20 Genes
	Pentose Phosphate Signature	0.883955	0.701569	1	1	0.2	3.78552		Alternative Complement Pathway		Pentose Phosphate Signature	0.918801	1	0.961332	0.731279	0.578947	4.19036		Alternative Complement Pathway		COX7B	1	1	0.3125	1	0.0102041	3.3227		CARD16
	Cell Cycle	1	1	0.269053	5.14839e-17	0.8	3.06905		Amino Acid Metabolism		Cell Cycle	1	0.333333	0.341202	1	0.210526	2.88506		Amino Acid Metabolism		UQCRB	0.930311	0.828205	1	0.156198	0.265306	3.18002		CCNB1
	Amino Acid Metabolism	0.437286	0.526638	0	0.192529	0.942857	2.09931		Anergic / Activated T cells		Anti inflammation	0.275562	0.888889	0.380427	0.12669	0.947368	2.61894		Anti inflammation		CEP55	0.807106	0.295367	0.0625	0.000999896	0.908163	2.07414		CCNB2
	Plasma Cell	0.846075	0.552363	0.0479391	0.0704618	0.257143	1.77398		Anti inflammation		Oxidative Phosphorylation	0.178015	0.444444	0.76197	0.204109	0.842105	2.43064		CD40 Activated B Cell		CCNB2	0.818454	0.287189	0	5.40626e-10	0.938776	2.04442		CDC20
	Oxidative Phosphorylation	0.409761	0.0668956	0.461726	0.202015	0.457143	1.59754		Apoptosis		Amino Acid Metabolism	0.584836	0.333333	0.101184	0.383873	0.894737	2.29796		Cell Cycle		H2BC5	0.765182	0.152177	0.0625	0.0641992	0.94898	1.99304		CEP55
	IFN	0.209417	0.00930336	0.388641	5.14839e-17	0.971429	1.57879		CD40 Activated B Cell		T Cell	0.181391	0.333333	0.322101	0	0.789474	1.6263		Oxidative Phosphorylation		NDUFAF7	0.438851	0.322434	1	0.000985734	0.163265	1.92554		CFL1
	Apoptosis	0.205376	0.0694615	0.378535	5.14839e-17	0.857143	1.51051		Cell Cycle		Plasma Cell	0.6182	0.111111	0.198095	0.0359338	0.631579	1.59492		Pentose Phosphate Signature		H2BC21	0.44838	0.594072	0.125	0.0126939	0.673469	1.85361		COX7B
	Anti inflammation	0.12042	0.113528	0.335434	0.0147803	0.885714	1.46988		Classical Complement Pathway		Alternative Complement Pathway	0.168558	0.444444	0.483443	0.0175334	0.473684	1.58766		Plasma Cell		CARD16	0.596912	0.219318	0	3.322e-10	0.897959	1.71419		COX7C
	CD40 Activated B Cell	0.306898	0.187241	0.0794008	5.14839e-17	0.828571	1.40211		Cytotoxic, Activated T Cell		CD40 Activated B Cell	0.269902	0	0.206524	0	1	1.47643		T Cell		CCNB1	0.352883	0.312721	0	1.90263e-07	0.918367	1.58397		E2F3
	Anergic / Activated T cells	0.267237	0.0976827	0.050501	5.14839e-17	0.914286	1.32971		Fatty Acid Beta Oxidation		TCA cycle	0.151223	0.333333	0.241637	0	0.736842	1.46304		TCA cycle		CFL1	0.605747	0.199689	0	9.48359e-18	0.755102	1.56054		H2AC6
	Alternative Complement Pathway	0.76619	0.118261	0.327651	0.112907	0	1.32501		IFN		TNF	0.0147257	0.111111	1	3.2824e-06	0.315789	1.44163				TMEM126B	0.52945	0.499429	0	9.48359e-18	0.469388	1.49827		H2BC21
	TNF	0.143069	0.0225626	0.378186	5.14839e-17	0.771429	1.31525		Monocyte		Monocyte	0.0511021	0.222222	0.496118	0	0.526316	1.29576				COX7C	0.662759	0.700405	0	1.06488e-05	0.122449	1.48562		H2BC5
	TCA cycle	0.127218	0.0555739	0.113246	4.24127e-06	1	1.29604		Oxidative Phosphorylation		Fatty Acid Beta Oxidation	0.116844	0	0.627476	0	0.263158	1.00748				SDC1	0.395045	0.0855942	0	9.48359e-18	0.989796	1.47044		HMGB2
	Tactivated	0.530287	0.103001	0.185761	0	0.4	1.21905		Pentose Phosphate Signature		Anergic / Activated T cells	0.0447216	0.111111	0.166944	0.000289217	0.684211	1.00728				CDC20	0.534956	0.117262	0	1.79792e-05	0.653061	1.3053		LAP3
	Classical Complement Pathway	0	0.172837	0.176454	0.0238612	0.742857	1.11601		Plasma Cell		IFN	0.190349	0	0.201404	0.105434	0.421053	0.91824				LAP3	0.485397	0.0351072	0	9.48359e-18	0.765306	1.28581		NDUFA5
	Cytotoxic, Activated T Cell	0.287886	0.049845	0.0328467	0.0284971	0.714286	1.11336		Platelets		Apoptosis	0.141853	0	0.305445	0.066336	0.368421	0.882055				E2F3	0.336765	0.0865594	0	9.48359e-18	0.857143	1.28047		NDUFAF7
	Platelets	0.572323	0.112393	0.114148	0.0236963	0.285714	1.10827		T Cell		Classical Complement Pathway	0.154486	0.333333	0.20545	0.0430466	0.105263	0.841579				NDUFA5	0.602019	0.582384	0	3.28718e-05	0.0918367	1.27627		PGD
	Fatty Acid Beta Oxidation	0.0744243	0.0269372	0.427068	5.14839e-17	0.571429	1.09986		Tactivated		Platelets	0.203547	0.222222	0.112993	0.229826	0	0.768588				H2AC6	0.201868	0.0814607	0	9.48359e-18	0.969388	1.25272		SDC1
	T Cell	0.399119	0.188436	0.127429	5.14839e-17	0.371429	1.08641		TCA cycle		Cytotoxic, Activated T Cell	0	0.111111	0.370717	0.0518195	0.0526316	0.58628				HMGB2	0.394971	0.0612197	0	7.27906e-09	0.77551	1.2317		TMEM126B
	Monocyte	0.158981	0.0276858	0.81097	5.14839e-17	0.0571429	1.05478		TNF		Tactivated	0.0720233	0.222222	0	2.09009e-06	0.157895	0.452142				PGD	0.199657	0.0248432	0	9.48359e-18	1	1.2245		UQCRB
	Inflammatory_Neutrophil	0.113287	0.218413	0.0420014	0.192169	0.485714	1.05158					Logistic Regression	Random Forest	AdaBoost	LDA	SVM	Overall		Top 10 Features		HIF1A	0.464498	0	0	9.48359e-18	0.734694	1.19919
	Granulocyte	0.191733	0.0922205	0.237467	5.14839e-17	0.514286	1.03571				Pentose Phosphate Signature	0.890073	0.754376	1	1	0.789474	4.43392		Alternative Complement Pathway		GZMM	0.191644	0.0172298	0	9.48359e-18	0.979592	1.18847
	Dendritic Cell	0.0541611	0.00075562	0.256786	5.14839e-17	0.657143	0.968845				Cell Cycle	1	1	0.454545	0.44672	0.526316	3.42758		Amino Acid Metabolism		PTTG1	0.433425	0.0988046	0.0625	9.48359e-18	0.571429	1.16616
	Proinflammatory IL-1 Family	0.439638	0.0957112	0.118053	5.14839e-17	0.314286	0.967688				Alternative Complement Pathway	0.843977	0.541595	0.636364	0.38227	0.473684	2.87789		Anti inflammation		TTC19	0.177905	0.0470811	0	9.48359e-18	0.928571	1.15356
	LDG	0.405023	0	0.120786	5.14839e-17	0.428571	0.95438				Amino Acid Metabolism	0.621112	0.377106	0.0909091	0.232121	0.894737	2.21599		Apoptosis		IL1RN	0.198191	0.0653626	0	9.48359e-18	0.877551	1.1411
	Unfolded Protein	0.325049	0.042108	0.344693	0.00344186	0.171429	0.88672				Plasma Cell	0.83661	0.678334	0.181818	0	0	1.69676		Cell Cycle		FAS	0.350723	0.149653	0	9.48359e-18	0.632653	1.13303
	Glycolysis	0.104033	0.0940042	0.119971	5.14839e-17	0.542857	0.860866				TCA cycle	0.26177	0.0613223	0	0.477677	0.842105	1.64287		Oxidative Phosphorylation		TOP2A	0.224171	0.0527267	0	6.46868e-07	0.836735	1.11363
	Fatty Acid Alpha Oxidation	0.0799584	0.0259705	0.145749	5.14839e-17	0.6	0.851678				Apoptosis	0.223563	0.0802296	0.181818	0.481461	0.631579	1.59865		Pentose Phosphate Signature		CCNE1	0.503922	0.064028	0	9.48359e-18	0.540816	1.10877
	Treg	0.0514026	0.0311264	0.0450215	5.14839e-17	0.685714	0.813265				Oxidative Phosphorylation	0.490933	0.0215308	0.363636	0.28181	0.421053	1.57896		Plasma Cell		TPX2	0.537414	0.183643	0	8.83915e-05	0.336735	1.05788
	pDC	0.301416	0.0897699	0.100296	8.03535e-17	0.228571	0.720053				Anti inflammation	0.0858911	0.308827	0.181818	0.292689	0.684211	1.55344		TCA cycle		WSB2	0.236584	0.0134969	0	9.48359e-18	0.806122	1.0562
	Erythrocytes	0.00592038	0.0193905	0.0605645	5.14839e-17	0.628571	0.714447				TNF	0.251723	0.0633001	0.0909091	0.78464	0.315789	1.50636		TNF		CLEC4D	0.674574	0.0508343	0	9.48359e-18	0.326531	1.05194
	MHC II	0.373414	0.0950805	0.187127	5.14839e-17	0.0285714	0.684193				CD40 Activated B Cell	0.265452	0.330317	0.181818	0.148505	0.578947	1.50504				HMMR	0.0849303	0.0700609	0	0.00756144	0.887755	1.05031
	ROS Protection	0.159521	0.0703383	0.0277315	5.14839e-17	0.342857	0.600448				MHC II	0.606507	0.373852	0.181818	0.21543	0.0526316	1.43024				NDUFAF5	0.474196	0.303071	0.125	9.48359e-18	0.142857	1.04512
	NLRP3 Inflammasome	0.104811	0.045643	0.162578	0.0199325	0.142857	0.475821				Classical Complement Pathway	0.0505102	0.141636	0	0.254448	0.947368	1.39396				COX20	0.173482	0	0	1.6977e-05	0.867347	1.04085
	NFkB Complex	0.0483337	0.0281056	0.0445386	5.14839e-17	0.0857143	0.206692				Anergic / Activated T cells	0.188925	0.182941	0.0909091	0.137193	0.736842	1.33681				MCEMP1	0.212866	0.0867966	0	7.24533e-07	0.72449	1.02415
	NK Cell	0.0395032	0.023772	0.0277663	5.14839e-17	0.114286	0.205327				Inflammatory_Neutrophil	0.169288	0.148769	0.545455	0.365067	0.105263	1.33384				CASP3	0.344949	0.116765	0.0625	9.48359e-18	0.489796	1.01401
2		RF	ADB	LDA	GB	SVM	Overall		Top 20 Features		Dendritic Cell	0.0837838	0	0	0.0515502	1	1.13533				COX18	0.14798	0.0575382	0	9.48359e-18	0.795918	1.00144
	Cell Cycle	1	0.222222	0.417269	1	0.8	3.43949		Alternative Complement Pathway		IFN	0.141761	0.138967	0.181818	0.337784	0.210526	1.01086				GBP4	0.141212	0.0089909	0	9.48359e-18	0.846939	0.997142
	Pentose Phosphate Signature	0.498506	1	1	0.512875	0.0285714	3.03995		Amino Acid Metabolism		Granulocyte	0.344	0.117776	0	0.156541	0.263158	0.881475				CAPZA1	0.231528	0	0.0625	0.006041	0.693878	0.993946
	Alternative Complement Pathway	0.283277	0.666667	0.541203	0.162038	0	1.65319		Anergic / Activated T cells		Fatty Acid Beta Oxidation	0	0.068659	0.0909091	0.350994	0.368421	0.878984				AASS	0.0210322	0.00817031	0	9.48359e-18	0.959184	0.988386
	Oxidative Phosphorylation	0.082923	0.333333	0.672146	0.273728	0.228571	1.5907		Anti inflammation		Tactivated	0.335424	0.0803077	0.0909091	0.0155829	0.157895	0.680119				GBP5	0.147196	0.00693292	0	9.48359e-18	0.826531	0.980659
	Anti inflammation	0.130008	0.333333	0.199652	0.0285864	0.885714	1.57729		Apoptosis			LR	DTREE	LDA	SVM	KNN	Overall		Top 10 Features		DNAJC15	0.377151	0.159376	0.125	4.38507e-06	0.316327	0.977859
	Inflammatory_Neutrophil	0.0679487	0.333333	0.071298	0.0237061	1	1.49629		CD40 Activated B Cell		Pentose Phosphate Signature	1	1	1	0.473684	0.894737	4.36842		Amino Acid Metabolism		APAF1	0.206369	0.013614	0	0.00222227	0.704082	0.926287
	Apoptosis	0.0332911	0.111111	0.486444	3.00252e-05	0.857143	1.48802		Cell Cycle		Oxidative Phosphorylation	0.429592	0	0.909921	0.578947	0.736842	2.6553		Anti inflammation		MSH6	0.303278	0.00392045	0	9.48359e-18	0.612245	0.919443
	Amino Acid Metabolism	0.319515	0.111111	0.0763553	8.46146e-05	0.942857	1.44992		Classical Complement Pathway		Cell Cycle	0.900941	0.122375	0.212309	0.894737	0.421053	2.55141		Apoptosis		FKBP5	0.0526841	0.0330432	0	0.000812143	0.816327	0.902866
	Anergic / Activated T cells	0.180934	0.222222	0.0544137	0.000213945	0.914286	1.37207		Dendritic Cell		Proinflammatory IL-1 Family	0.702655	0	0.245212	0.789474	0.684211	2.42155		Cell Cycle		CD177	0.311299	0.0211882	0	2.24648e-08	0.561224	0.893712
	Plasma Cell	0.50785	0.222222	0.162882	0.0327652	0.428571	1.35429		Fatty Acid Beta Oxidation		Amino Acid Metabolism	0.646018	0.384698	0.063247	0.631579	0.631579	2.35712		Monocyte		LMNB1	0.104153	0.0728948	0	0.000548435	0.714286	0.891882
	Granulocyte	0.0700604	0	0.277293	0.00670148	0.971429	1.32548		Granulocyte		Platelets	0.471899	0	0.139585	0.684211	0.842105	2.1378		Oxidative Phosphorylation		MCM10	0.0819441	0.0435797	0	9.48359e-18	0.744898	0.870422
	Classical Complement Pathway	0.0487807	0.111111	0.378611	3.81494e-05	0.685714	1.22426		IFN		Monocyte	0.0924491	0	0.44184	0.526316	1	2.0606		Pentose Phosphate Signature		ANXA1	0.252708	0.103975	0	1.0915e-10	0.510204	0.866887
	CD40 Activated B Cell	0.0970449	0	0.17517	0.0051851	0.828571	1.10597		Inflammatory_Neutrophil		Anti inflammation	0.31948	0.0905172	0.43063	0.736842	0.473684	2.05115		Platelets		NT5C3A	0.379258	0.0521313	0.0625	9.48359e-18	0.367347	0.861237
	Fatty Acid Beta Oxidation	0.0380725	0	0.460762	0.0055605	0.542857	1.04725		MHC II		Apoptosis	0.0615134	0	0.407376	1	0.526316	1.99521		Proinflammatory IL-1 Family		CFD	0.391157	0.00457014	0	9.48359e-18	0.459184	0.854911
	MHC II	0.168901	0.222222	0.156219	0.10373	0.371429	1.0225		Oxidative Phosphorylation		TNF	0.162958	0	0.462246	0.842105	0.263158	1.73047		TNF		GSTK1	0.0122838	0.02056	0	9.48359e-18	0.785714	0.818558
	TNF	0.0278567	0	0.217344	2.30468e-09	0.771429	1.01663		Pentose Phosphate Signature		Alternative Complement Pathway	0.557173	0	0.400744	0.368421	0.157895	1.48423				DUSP4	0.523645	0.0533127	0	9.85089e-10	0.234694	0.811651
	Dendritic Cell	0.0184609	0.111111	0.167727	0.0161831	0.628571	0.942054		Plasma Cell		LDG	0.279073	0.209056	0.151304	0.421053	0.368421	1.42891				TKTL1	0.330624	0.0117052	0	0.000241019	0.44898	0.791549
	Tactivated	0.0635986	0	0.129785	0.000609132	0.742857	0.93685		Tactivated		Unfolded Protein	0.19399	0	0.12417	0.263158	0.789474	1.37079				MCM2	0.0720299	0.0739407	0	9.48359e-18	0.642857	0.788828
	TCA cycle	0.0447669	0.111111	0.0560642	0.00202564	0.714286	0.928254		TCA cycle		Fatty Acid Beta Oxidation	0.227441	0	0.593694	0.315789	0.210526	1.34745				NDUFS1	0.0871252	0.00107721	0	0.00407851	0.622449	0.71473
	IFN	0.0675108	0	0.238148	0.144121	0.457143	0.906923		TNF		Cytotoxic, Activated T Cell	0	0	0.213069	0.157895	0.947368	1.31833				BRCA1	0.00593847	0.00862723	0	0	0.683673	0.698239
	Proinflammatory IL-1 Family	0.156734	0.222222	0.198139	0.183514	0.142857	0.903467				Plasma Cell	0.688611	0	0.15811	0.105263	0.315789	1.26777				MKI67	0.512032	0.173763	0	0.006149	0	0.691944
	Fatty Acid Alpha Oxidation	0.0460052	0.111111	0.109381	3.37469e-05	0.571429	0.83796				CD40 Activated B Cell	0.242802	0.0776496	0.248464	0.0526316	0.578947	1.20049				GLUD1	0.00855997	0.00410141	0	0.00180773	0.663265	0.677734
	Monocyte	0	0	0.473075	9.69605e-05	0.342857	0.816029				MHC II	0.211596	0	0	0.947368	0	1.15896				ASPM	0.107134	0.0488704	0	1.61647e-06	0.520408	0.676414
	Cytotoxic, Activated T Cell	0.0631164	0	0.0898197	6.83864e-11	0.657143	0.810079				Tactivated	0.522394	0	0.160492	0	0.105263	0.788149				PSAT1	0.0778831	0.013826	0	4.84518e-05	0.581633	0.67339
	Erythrocytes	0.0645629	0	0.0785546	0.0456332	0.6	0.788751				Erythrocytes	0.108715	0	0.0929024	0.210526	0.0526316	0.464775				CASP7	0.158534	0.00843829	0	9.48359e-18	0.5	0.666972
	LDG	0.0263589	0.111111	0.237365	0.0049054	0.4	0.77974					LR	RF	DTREE	LDA	SVM	Overall		Top 10 Features		CENPM	0.0609402	0.00454529	0	9.48359e-18	0.591837	0.657322
	NFkB Complex	0.015079	0.333333	0.110937	0.00015378	0.314286	0.773789				Pentose Phosphate Signature	0.972595	0.942916	1	1	0.368421	4.28393		Amino Acid Metabolism		PRPS2	0.0528885	0	0	6.08461e-05	0.602041	0.65499
	Glycolysis	0.0638425	0.111111	0.0141199	0.0106634	0.514286	0.714023				Cell Cycle	1	1	0	0.340769	0.421053	2.76182		CD40 Activated B Cell		VSIG4	0.133729	0.0406749	0	3.03996e-05	0.479592	0.654026
	Unfolded Protein	0.0639732	0.111111	0.348345	0.00148367	0.171429	0.696342				Plasma Cell	0.70208	0.428321	0.207065	0.148091	0.842105	2.32766		Cell Cycle		C3	0.369243	0.0121878	0	9.48359e-18	0.255102	0.636532
	NLRP3 Inflammasome	0.0386598	0.111111	0.284516	6.59403e-05	0.257143	0.691496				Inflammatory_Neutrophil	0.258367	0.220662	0.384698	0.542844	0.578947	1.98552		Classical Complement Pathway		SCO2	0.0594174	0.0131424	0	9.48359e-18	0.55102	0.62358
	Platelets	0.110164	0.222222	0.194545	0.103309	0.0571429	0.687383				Amino Acid Metabolism	0.51734	0.440391	0	0.048044	0.894737	1.90051		IFN		RPE	0.164202	0	0	0.000521532	0.438776	0.603499
	ROS Protection	0.127288	0.111111	0.274539	8.5091e-06	0.114286	0.627232				CD40 Activated B Cell	0.338738	0.302361	0	0.166206	0.947368	1.75467		Inflammatory_Neutrophil		AURKA	0.0568544	0.0142472	0	9.48359e-18	0.530612	0.601714
	Treg	0.0121127	0	0	0	0.485714	0.497827				IFN	0.315485	0.193435	0	0.294152	0.789474	1.59255		Oxidative Phosphorylation		SLC25A4	0.167111	0.0101948	0	9.48359e-18	0.408163	0.585469
	NK Cell	0.0420274	0	0.00352547	7.77578e-05	0.285714	0.331345				Oxidative Phosphorylation	0.431284	0.117017	0.202015	0.744122	0.0526316	1.54707		Pentose Phosphate Signature		GINS2	0.280224	0.00900033	0	9.48359e-18	0.295918	0.585143
	pDC	0.0588988	0	0.0457243	0.000275602	0.2	0.304899				Classical Complement Pathway	0.0558758	0.121657	0	0.367187	1	1.54472		Plasma Cell		ZWINT	0.1899	0.00670515	0	9.48359e-18	0.387755	0.58436
	T Cell	0.00908321	0	0.14034	5.05687e-08	0.0857143	0.235137				Unfolded Protein	0.405434	0.115295	0	0.68252	0.263158	1.46641		Unfolded Protein		ANXA3	0.200729	0.0366397	0	9.48359e-18	0.346939	0.584307
3		LR	RF	ADB	LDA	SVM	Overall		Top 20 Features		Tactivated	0.577916	0.145919	0	0.238163	0.473684	1.43568				PRDX3	0.101093	0.0114724	0	9.48359e-18	0.418367	0.530933
	Pentose Phosphate Signature	0.849299	0.967654	1	1	0.342857	4.15981		Alternative Complement Pathway		TNF	0.171338	0.0141448	0	0.561383	0.684211	1.43108				CFH	0.057733	0.032078	0	2.19237e-09	0.428571	0.518382
	Cell Cycle	1	1	0.4	0.41076	0.542857	3.35362		Amino Acid Metabolism		Anti inflammation	0.146139	0.214859	0.0905172	0.284754	0.631579	1.36785				OXCT1	0.133693	0.0627473	0	9.48359e-18	0.285714	0.482155
	Alternative Complement Pathway	0.816127	0.248622	0.6	0.468104	1	3.13285		Anti inflammation		Fatty Acid Beta Oxidation	0.147153	0.106927	0	0.358519	0.736842	1.34944				ARG1	0.088303	0.028197	0	9.48359e-18	0.357143	0.473643
	Plasma Cell	0.858303	0.626495	0.2	0.0950029	0.8	2.5798		Apoptosis		Alternative Complement Pathway	0.597295	0.277599	0	0.32655	0	1.20144				OAT	0.0205897	0.00962075	0	9.48359e-18	0.397959	0.42817
	Oxidative Phosphorylation	0.442956	0.0553	0.2	0.607151	0.942857	2.24826		CD40 Activated B Cell		Apoptosis	0.0804788	0.107067	0	0.254689	0.526316	0.968551				WEE1	0.0185396	0.00942061	0.0625	3.28752e-11	0.306122	0.396583
	Amino Acid Metabolism	0.45803	0.683087	0.1	0.0183363	0.714286	1.97374		Cell Cycle		Erythrocytes	0.178201	0.0846895	0	0.0988168	0.315789	0.677497				C3AR1	0	0.0137282	0	9.48359e-18	0.377551	0.391279
	Fatty Acid Beta Oxidation	0.00650059	0.109856	0.2	0.456863	0.828571	1.60179		Cytotoxic, Activated T Cell		LDG	0.394716	0.0404367	0	0.111072	0.105263	0.651488				SOCS3	0.14887	0.0275978	0	9.40848e-05	0.193878	0.37044
	Monocyte	0.0443947	0.0154982	0	0.583532	0.914286	1.55771		Erythrocytes		Cytotoxic, Activated T Cell	0	0.0982173	0	0.223132	0.210526	0.531876				TYMS	0.0841915	0.00418181	0	9.48359e-18	0.27551	0.363884
	Platelets	0.464749	0.0436737	0	0.176985	0.857143	1.54255		Fatty Acid Beta Oxidation		Dendritic Cell	0.122005	0	0	0	0.157895	0.2799				CR1	0.184881	0	0	9.48359e-18	0.132653	0.317534
	MHC II	0.428004	0.18727	0.4	0.197582	0.2	1.41286		LDG			LR	RF	LDA	GB	SVM	Overall		Top 10 Features		NDUFB6	0.0618297	0.0712735	0	9.48359e-18	0.183673	0.316777
	Anti inflammation	0.204222	0.161169	0.1	0.280007	0.628571	1.37397		MHC II		Pentose Phosphate Signature	1	0.864529	0.800178	0.539347	0.842105	4.04616		Alternative Complement Pathway		BUB1B	0.065105	0.0111958	0	9.48359e-18	0.22449	0.300791
	Cytotoxic, Activated T Cell	0.12931	0.051287	0.1	0.108429	0.971429	1.36046		Monocyte		Cell Cycle	0.833212	1	0.37265	1	0.526316	3.73218		Amino Acid Metabolism		MZB1	0.174069	0.0447066	0	0.00931127	0.0714286	0.299516
	Tactivated	0.379115	0.0339184	0	0.164012	0.771429	1.34847		Oxidative Phosphorylation		Plasma Cell	0.907236	0.556248	0.329192	0.158401	0.789474	2.74055		Apoptosis		THEMIS2	0.00352683	0.0522119	0	9.48359e-18	0.214286	0.270024
	Apoptosis	0.145511	0.12589	0	0.476878	0.6	1.34828		Pentose Phosphate Signature		Oxidative Phosphorylation	0.540331	0.0982908	1	0.135413	0.894737	2.66877		Cell Cycle		MTPN	0.197968	0	0	6.54402e-06	0.0612245	0.259199
	CD40 Activated B Cell	0.248568	0.2725	0	0.184385	0.571429	1.27688		Plasma Cell		Inflammatory_Neutrophil	0.285853	0.321991	0.285899	0.399244	0.947368	2.24036		Cytotoxic, Activated T Cell		CAST	0.0694097	0.0358664	0	0.000578374	0.153061	0.258916
	Proinflammatory IL-1 Family	0.561694	0.278284	0.2	0.194493	0	1.23447		Platelets		Alternative Complement Pathway	0.718571	0.198671	0.487805	0.0919868	0.473684	1.97072		Inflammatory_Neutrophil		SPTLC2	0.01144	0	0	9.48359e-18	0.244898	0.256338
	Unfolded Protein	0.310422	0.0532278	0.1	0.28261	0.485714	1.23197		Proinflammatory IL-1 Family		Amino Acid Metabolism	0.486649	0.448005	0.0914278	0.0448603	0.736842	1.80778		Oxidative Phosphorylation		CD58	0.194061	0	0	9.48359e-18	0.0510204	0.245081
	TNF	0.121797	0.0387131	0	0.358918	0.685714	1.20514		Tactivated		Apoptosis	0.207129	0.133252	0.429601	0	0.684211	1.45419		Pentose Phosphate Signature		GPT2	0.117537	0.00783049	0	1.30808e-18	0.112245	0.237613
	LDG	0.356479	0.024294	0.4	0.192832	0.228571	1.20218		TNF		Platelets	0.444358	0.328884	0.14497	0.143852	0.315789	1.37785		Plasma Cell		SLFN5	0.00865362	0.0201818	0	9.48359e-18	0.204082	0.232917
	Erythrocytes	0.0854915	0.0898909	0	0.0815839	0.885714	1.14268		Unfolded Protein		Cytotoxic, Activated T Cell	0.0234608	0.03229	0.250816	0.0430025	1	1.34957		Platelets		CYCS	0.019037	0.025011	0	0.00500575	0.173469	0.222523
	TCA cycle	0.131282	0.0737373	0	0.0852505	0.742857	1.03313				ROS Protection	0	0.0714974	0.528384	0	0.631579	1.23146				MTHFD2	0.172745	0.00473351	0	9.48359e-18	0.0408163	0.218294
	ROS Protection	0.219707	0.144074	0	0.21653	0.428571	1.00888				CD40 Activated B Cell	0.0707339	0.3227	0.109999	0.0816578	0.578947	1.16404				C5	0.183949	0	0	9.48359e-18	0.0306122	0.214562
	Anergic / Activated T cells	0.0464841	0.163359	0.1	0	0.657143	0.966986				Proinflammatory IL-1 Family	0.426614	0.237383	0.250827	0.0248818	0.210526	1.15023				NDUFA2	0.125728	0	0	0.000294633	0.0816327	0.207655
	IFN	0.212133	0.0570191	0	0.372411	0.285714	0.927277				Classical Complement Pathway	0.0361071	0.13609	0.497902	0.0482387	0.421053	1.13939				BAD	0.043298	0.0554245	0	4.86758e-07	0.102041	0.200764
	Classical Complement Pathway	0.00340733	0.0757421	0	0.308406	0.514286	0.901841				LDG	0.467626	0	0.301574	0.000128584	0.368421	1.13775				ADD3	0.086733	0.00243503	0	9.48359e-18	0.0204082	0.109576
	Dendritic Cell	0.0648997	0.0192229	0.1	0.247543	0.457143	0.888808				Fatty Acid Beta Oxidation	0.142426	0.0487278	0.60661	0	0.105263	0.903027					LRR	RF	ADB	LDA	SVM	Overall		Top 20 Genes
	Granulocyte	0.00767147	0.102721	0.1	0.294149	0.314286	0.818826				MHC II	0.436141	0.221491	0.110393	0.131249	0	0.899273				COX7B	1	1	0.0952381	0.110164	0.969388	3.17479		CARD16
	Inflammatory_Neutrophil	0.17273	0.074534	0.2	0.104591	0.257143	0.808997				Granulocyte	0.0733959	0.080632	0.191207	0.0251886	0.157895	0.528319				UQCRB	0.861423	0.677027	0.952381	0.21169	0.306122	3.00864		CASP7
	T Cell	0.323347	0.122189	0.1	0.170684	0.0571429	0.773363				Erythrocytes	0.00745652	0.093929	0	0	0.263158	0.364543				COX7C	0.603941	0.562396	0	0.177509	0.94898	2.29283		CCNB1
	Glycolysis	0.0539679	0.126464	0.1	0.0702941	0.371429	0.722155				Glycolysis	0.0845447	0.0842633	0.111582	0.000137236	0.0526316	0.333159				H2BC21	0.473843	0.533738	0	0.245457	0.765306	2.01834		CCNB2
	Fatty Acid Alpha Oxidation	0.0279124	0	0.1	0.153504	0.4	0.681417					RF	DTREE	LDA	GB	SVM	Overall		Top 10 Features		NDUFAF7	0.459074	0.361429	1	0.0155604	0.0612245	1.89729		CDC20
	pDC	0.234596	0.188337	0	0.0858881	0.0285714	0.537393				Pentose Phosphate Signature	1	1	0.848412	1	0.0526316	3.90104		Alternative Complement Pathway		H2BC5	0.841791	0.112959	0.0476191	0.131883	0.755102	1.88935		CEP55
	NFkB Complex	0.00232589	0.0259839	0.2	0.0139334	0.142857	0.3851				Amino Acid Metabolism	0.529207	0.384698	0.059975	0.374583	0.947368	2.29583		Amino Acid Metabolism		CARD16	0.603269	0.224238	0.0476191	0.0612572	0.908163	1.84455		CFL1
	NLRP3 Inflammasome	0	0.0522122	0	0.221839	0.0857143	0.359765				Cell Cycle	0.856354	0	0.713623	0	0.368421	1.9384		CD40 Activated B Cell		DNAJC15	0.365466	0.183101	0	0.298752	0.918367	1.76569		COX7B
	NK Cell	0.150909	0.03539	0	0.0478953	0.114286	0.348479				Plasma Cell	0.471099	0.232949	0.316266	0.226824	0.684211	1.93135		Cell Cycle		CCNB2	0.757207	0.194655	0	0.0783024	0.704082	1.73425		COX7C
	Treg	0.00448913	0.0311049	0	0.0329541	0.171429	0.239977				Oxidative Phosphorylation	0.136379	0.176132	0.460432	0.171501	0.789474	1.73392		Classical Complement Pathway		CDC20	0.621908	0.216848	0	0.160712	0.663265	1.66273		DNAJC15
4		LR	ADB	LDA	SVM	NB	Overall		Top 20 Features		Classical Complement Pathway	0.109582	0	0.507321	0.0378847	1	1.65479		LDG		CEP55	0.645086	0.0964608	0.0476191	0.143203	0.72449	1.65686		DUSP4
	Pentose Phosphate Signature	0.765435	1	1	0.2	0.8	3.76543		Alternative Complement Pathway		Unfolded Protein	0.0918393	0	1	0	0.315789	1.40763		Oxidative Phosphorylation		CFL1	0.601808	0.118274	0	0.183966	0.693878	1.59793		E2F3
	Cell Cycle	1	0.5	0.416388	0.8	0.971429	3.68782		Amino Acid Metabolism		LDG	0	0	0.365844	0	0.842105	1.20795		Pentose Phosphate Signature		NDUFA5	0.572136	0.686553	0.0476191	0.202573	0.0816327	1.59051		H2BC21
	Anti inflammation	0.322294	0.625	0.364609	0.885714	0.914286	3.1119		Anti inflammation		Alternative Complement Pathway	0.155986	0	0.565338	0	0.473684	1.19501		Plasma Cell		CCNB1	0.368037	0.25906	0	0.312469	0.591837	1.5314		H2BC5
	Alternative Complement Pathway	0.842519	0.625	0.505892	0	0.942857	2.91627		Apoptosis		CD40 Activated B Cell	0.432638	0	0.312406	4.83e-17	0.421053	1.1661		Unfolded Protein		E2F3	0.32878	0.0291435	0	0.262544	0.887755	1.50822		NDUFA5
	Apoptosis	0.240542	0	0.521693	0.857143	0.885714	2.50509		CD40 Activated B Cell		Apoptosis	0.171902	0	0.466621	9.53e-17	0.526316	1.16484				DUSP4	0.511999	0.0154354	0	0.0532822	0.897959	1.47868		NDUFAF5
	TNF	0.18115	0	0.500361	1	0.742857	2.42437		Cell Cycle		Tactivated	0.12689	0	0.112563	0	0.894737	1.13419				CASP7	0.147641	0	0	0.748104	0.571429	1.46717		NDUFAF7
	Classical Complement Pathway	0.043273	0.25	0.274109	0.742857	1	2.31024		Classical Complement Pathway		Anti inflammation	0.181799	0.0905172	0.0327408	0.0239589	0.736842	1.06586				WSB2	0.199101	0	0	0.235243	1	1.43434		TMEM126B
	Inflammatory_Neutrophil	0.17297	0.75	0.000592106	0.485714	0.828571	2.23785		Cytotoxic, Activated T Cell		Anergic / Activated T cells	0.215341	0	0.326516	0	0.263158	0.805015				TMEM126B	0.502876	0.347388	0	0.177928	0.387755	1.41595		UQCRB
	Plasma Cell	0.946634	0	0.0894204	0.257143	0.771429	2.06463		Dendritic Cell		MHC II	0.103903	0	0	0	0.631579	0.735482				NDUFAF5	0.493419	0.261649	0.0476191	0.529577	0.0714286	1.40369		WSB2
	LDG	0.423204	0.125	0.197335	0.428571	0.857143	2.03125		Erythrocytes		IFN	0.112688	0	0.0417868	0	0.578947	0.733422				HIF1A	0.431203	0.0156321	0	0.0962459	0.857143	1.40022
	Tactivated	0.575189	0.25	0.153121	0.4	0.571429	1.94974		Fatty Acid Beta Oxidation		Fatty Acid Beta Oxidation	0.0887565	0	0.379344	0	0.210526	0.678627				FAS	0.324916	0.0442289	0	0.137494	0.877551	1.38419
	IFN	0.156827	0	0.421705	0.971429	0.342857	1.89282		IFN		Granulocyte	0.0574057	0	0.414698	0	0.105263	0.577367				CCNE1	0.503952	0.0164239	0	0.107938	0.632653	1.26097
	Amino Acid Metabolism	0.51502	0.125	0	0.942857	0.285714	1.86859		Inflammatory_Neutrophil		Platelets	0.252212	0	0.150147	0	0	0.402359				COX20	0.223906	0	0	0.0437562	0.979592	1.24725
	Oxidative Phosphorylation	0.574024	0.125	0.732323	0.171429	0.257143	1.85992		LDG		pDC	0.0654321	0	0.0323874	0	0.157895	0.255714				CR1	0.219332	0.00667602	0	0.073894	0.938776	1.23868
	Fatty Acid Beta Oxidation	0.0889738	0	0.55556	0.571429	0.628571	1.84453		Oxidative Phosphorylation			DTREE	ADB	LDA	GB	SVM	Overall		Top 10 Features		GZMM	0.232284	0.00969182	0	0.168037	0.785714	1.19573
	CD40 Activated B Cell	0.206019	0	0.206184	0.828571	0.6	1.84077		Pentose Phosphate Signature		Pentose Phosphate Signature	1	1	1	1	0.526316	4.52632		Amino Acid Metabolism		CFD	0.347038	0.00394924	0	0.180982	0.642857	1.17483
	Unfolded Protein	0.334992	0.125	0.279162	0.771429	0.171429	1.68201		Plasma Cell		Oxidative Phosphorylation	0.202015	0.428571	0.540726	0.191919	0.631579	1.99481		Apoptosis		CASP3	0.343144	0.0471022	0	0.0681712	0.714286	1.1727
	Cytotoxic, Activated T Cell	0.288457	0	0.127945	0.714286	0.542857	1.67354		Tactivated		Proinflammatory IL-1 Family	0.384698	0	0.146258	0.365472	0.789474	1.6859		Cytotoxic, Activated T Cell		PSAT1	0.151352	0.0146389	0	0.0123601	0.989796	1.16815
	Erythrocytes	0.0382332	0.25	0.0579536	0.628571	0.685714	1.66047		TNF		Monocyte	0	0.285714	0.362657	0	0.947368	1.59574		Monocyte		CD58	0.19541	0.102436	0	0.191199	0.673469	1.16251
	Dendritic Cell	0.0406311	0.25	0.263594	0.657143	0.428571	1.63994		Unfolded Protein		Cytotoxic, Activated T Cell	0	0.214286	0.224138	0	0.894737	1.33316		Oxidative Phosphorylation		CD177	0.446507	0.039522	0	0.0702191	0.602041	1.15829
	ROS Protection	0.236986	0.125	0.179481	0.342857	0.714286	1.59861				Amino Acid Metabolism	0.0905172	0.142857	0.0305899	0.0182759	1	1.28224		pDC		HMGB2	0.362969	0.0476741	0	0.185861	0.561224	1.15773
	Anergic / Activated T cells	0.136929	0	0.0254533	0.914286	0.485714	1.56238				Plasma Cell	0.207065	0.142857	0.226577	0.163186	0.473684	1.21337		Pentose Phosphate Signature		COX18	0.144562	0.052963	0	0.177399	0.744898	1.11982
	Granulocyte	0.133203	0	0.324975	0.514286	0.514286	1.48675				Unfolded Protein	0	0.0714286	0.737352	0.0111663	0.263158	1.0831		Plasma Cell		H2AC6	0.250853	0	0	0.0916238	0.77551	1.11799
	Proinflammatory IL-1 Family	0.557738	0.125	0.186725	0.314286	0.2	1.38375				Apoptosis	0	0.0714286	0.148809	0	0.842105	1.06234		Proinflammatory IL-1 Family		GINS2	0.222107	0.0125004	0	0.0429409	0.826531	1.10408
	T Cell	0.435552	0.125	0.227087	0.371429	0.114286	1.27335				pDC	0	0.0714286	0.0399642	0	0.684211	0.795603		Unfolded Protein		CYCS	0.0293328	0.00789044	0	0.108028	0.928571	1.07382
	pDC	0.217316	0	0.0853904	0.457143	0.457143	1.21699				NLRP3 Inflammasome	0	0	0.214702	0	0.578947	0.79365				APAF1	0.194266	0.00779351	0	0.186936	0.683673	1.07267
	Glycolysis	0.0664321	0.125	0.0500732	0.542857	0.314286	1.09865				TCA cycle	0	0	0.0323769	0	0.736842	0.769219				SDC1	0.415385	0.0169076	0	0.175524	0.459184	1.067
	Platelets	0.496136	0	0.179803	0.285714	0.0857143	1.04737				Cell Cycle	0	0.214286	0.372407	0.00610557	0.157895	0.750693				BRCA1	0.0154531	0.0187549	0	0.673566	0.357143	1.06492
	NFkB Complex	0.0777202	0.375	0.100341	0.0857143	0.4	1.03878				MHC II	0	0.214286	0.107439	0	0.421053	0.742778				GBP4	0.159154	0.0207292	0	0	0.867347	1.04723
	Fatty Acid Alpha Oxidation	0.0658676	0	0.106432	0.6	0.228571	1.00087				Alternative Complement Pathway	0	0.285714	0.384165	0.0335908	0	0.70347				TPX2	0.461725	0.136308	0	0.0817116	0.367347	1.04709
	MHC II	0.26977	0.125	0.173469	0.0285714	0.371429	0.968239				Classical Complement Pathway	0	0.0714286	0.354147	0	0.210526	0.636101				ADD3	0.0604205	0.00207848	0	0.0167132	0.959184	1.0384
	Monocyte	0.0289414	0	0.744486	0.0571429	0.0571429	0.887713				LDG	0	0.0714286	0.152285	0	0.368421	0.592135				OAT	0.0099516	0.0145234	0	1	0.0102041	1.03468
	NK Cell	0.0251564	0	0.0411661	0.114286	0.657143	0.837751				Fatty Acid Beta Oxidation	0	0.0714286	0.168589	0.00033691	0.315789	0.556144				LAP3	0.540577	0.0722204	0	0.214537	0.204082	1.03142
	NLRP3 Inflammasome	0.0418946	0.125	0.370617	0.142857	0.142857	0.823226				Anti inflammation	0	0.142857	0.275931	0	0.0526316	0.471419				GBP5	0.0717413	0.0382717	0	0.063998	0.846939	1.02095
	Treg	0	0	0.0264494	0.685714	0.0285714	0.740735				CD40 Activated B Cell	0	0.0714286	0	7e-05	0.105263	0.176762				PTTG1	0.395285	0.0601271	0	0.0723814	0.489796	1.01759
	TCA cycle	0.194118	0.125	0.00597961	0.228571	0	0.553669					RF	DTREE	ADB	LDA	SVM	Overall		Top 10 Features		ANXA1	0.250815	0.118184	0	0.301162	0.346939	1.0171
5		LR	RF	LDA	GB	SVM	Overall		Top 20 Features		Pentose Phosphate Signature	1	1	1	1	0.736842	4.73684		Alternative Complement Pathway		C3	0.324017	0.0161964	0	0.0156001	0.653061	1.00887
	Cell Cycle	1	1	0.613636	1	0.685714	4.29935		Alternative Complement Pathway		Inflammatory_Neutrophil	0.196104	0.410533	0.181818	0.537728	0.842105	2.16829		Amino Acid Metabolism		MKI67	0.49372	0.133792	0.0476191	0.185233	0.142857	1.00322
	Amino Acid Metabolism	0.504148	0.675134	0.0799983	0.230668	0.542857	2.03281		Amino Acid Metabolism		Cell Cycle	0.783039	0.0856934	0.272727	0.414806	0.157895	1.71416		Anti inflammation		CAST	0.0592505	0.0650093	0	0.239375	0.581633	0.945267
	Pentose Phosphate Signature	0.641381	0.264302	0.783414	0.106662	0.2	1.99576		Apoptosis		Oxidative Phosphorylation	0.124236	0.241499	0.363636	0.664626	0.0526316	1.44663		Apoptosis		GPT2	0.0796893	0.0116384	0	0.0387776	0.806122	0.936228
	Plasma Cell	0.77164	0.487451	0.34366	0.0173554	0.257143	1.87725		CD40 Activated B Cell		Amino Acid Metabolism	0.392535	0	0.181818	0.236544	0.631579	1.44248		Cell Cycle		BUB1B	0.030857	0	0	0.049677	0.836735	0.917269
	Alternative Complement Pathway	0.747871	0.233092	0.803372	0.0086228	0	1.79296		Cell Cycle		Anti inflammation	0.308948	0.0970351	0.454545	0.201365	0.368421	1.43031		IFN		GLUD1	0.0207353	0.00698858	0	0.0705257	0.816327	0.914576
	LDG	0.40799	0.0153033	0.304481	0.00117361	1	1.72895		Classical Complement Pathway		IFN	0.101133	0	0.0909091	0.421565	0.789474	1.40308		Inflammatory_Neutrophil		CLEC4D	0.746065	0.0519278	0	0.0747435	0	0.872737
	Oxidative Phosphorylation	0.524128	0.012483	1	0.0245244	0.142857	1.70399		Cytotoxic, Activated T Cell		Apoptosis	0.171332	0	0.272727	0.372589	0.473684	1.29033		Monocyte		GSTK1	0.0389773	0.0288308	0	0.00076539	0.795918	0.864492
	Fatty Acid Beta Oxidation	0.135299	0.0365088	0.564166	0.00232829	0.885714	1.62402		Erythrocytes		Monocyte	0.0899115	0	0	0.246106	0.947368	1.28339		Oxidative Phosphorylation		IL1RN	0.232865	0.0531902	0	0.0373546	0.540816	0.864226
	CD40 Activated B Cell	0.197809	0.14632	0.536399	0.000644718	0.657143	1.53832		Fatty Acid Beta Oxidation		Alternative Complement Pathway	0.303521	0	0.545455	0.425614	0	1.27459		Pentose Phosphate Signature		SOCS3	0.186041	0.0157084	0	0.212109	0.428571	0.84243
	Proinflammatory IL-1 Family	0.636362	0.201093	0.364771	0.0174279	0.314286	1.53394		Glycolysis		Classical Complement Pathway	0.050504	0	0	0.21236	1	1.26286				PRDX3	0.0728906	0.00385367	0	0.513306	0.244898	0.834948
	Classical Complement Pathway	0.106711	0.0742478	0.678141	0.132377	0.514286	1.50576		Granulocyte		pDC	0.112527	0	0.0909091	0	0.894737	1.09817				CFH	0.0381894	0.0155927	0	0.137945	0.622449	0.814176
	Cytotoxic, Activated T Cell	0.218616	0.0384112	0.49638	1.58171e-06	0.714286	1.46769		Inflammatory_Neutrophil		TNF	0.0707536	0	0.181818	0.611699	0.210526	1.0748				FKBP5	0.0409183	0.00768557	0	0.00519513	0.734694	0.788493
	Granulocyte	0.13534	0.0674696	0.24803	0.00176858	0.942857	1.39547		LDG		Glycolysis	0.133496	0	0.363636	0.0113137	0.526316	1.03476				CAPZA1	0.215951	0.0254223	0	0.0352422	0.510204	0.78682
	Platelets	0.6245	0.0803974	0.277533	0.0603185	0.285714	1.32846		MHC II		LDG	0.0252143	0.186967	0.0909091	0.12727	0.421053	0.851414				ANXA3	0.237675	0.00395171	0	0.00639859	0.520408	0.768434
	Apoptosis	0.228962	0.0830849	0.374762	0.000325744	0.628571	1.31571		Oxidative Phosphorylation		Granulocyte	0.113049	0	0	0.0875956	0.578947	0.779592				THEMIS2	0.0444555	0.0433602	0	0.258326	0.408163	0.754304
	ROS Protection	0.240887	0.0782089	0.645617	0.000442283	0.342857	1.30801		Pentose Phosphate Signature		Cytotoxic, Activated T Cell	0.0302322	0	0.272727	0.209915	0.263158	0.776033				PGD	0.193782	0.0405822	0	0.275145	0.234694	0.744203
	Inflammatory_Neutrophil	0.0761172	0.101003	0.0276049	0.00523822	0.971429	1.18139		Plasma Cell		Dendritic Cell	0	0	0	0.0636577	0.684211	0.747868				NT5C3A	0.405604	0.116996	0.0476191	0.143245	0.0306122	0.744077
	Glycolysis	0.0815828	0.061468	0.109241	0.000772682	0.914286	1.16735		Platelets		Fatty Acid Beta Oxidation	0.114127	0	0.181818	0.30593	0.105263	0.707139				OXCT1	0.112395	0.00609806	0	0.519444	0.102041	0.739977
	Erythrocytes	0.0160007	0.105074	0.0820266	0.00188335	0.828571	1.03356		Proinflammatory IL-1 Family		Erythrocytes	0.0876512	0	0	0.13241	0.315789	0.535851				SPTLC2	0.0204926	0	0	0.29558	0.418367	0.73444
	MHC II	0.300521	0.142578	0.085169	0.0419989	0.428571	0.998838		ROS Protection			LDA	GB	SVM	NB	KNN	Overall		Top 10 Features		WEE1	0.0417795	0.0148107	0	0.123102	0.55102	0.730712
	Anergic / Activated T cells	0.146405	0.0292113	0.250794	0.000908201	0.571429	0.998747				TNF	1	0.0331311	0.789474	0.789474	0.315789	2.92787		TNF		RPE	0.186673	0.043675	0	0.0165683	0.479592	0.726508
	Dendritic Cell	0.0287381	0.00357154	0.162596	3.14913e-05	0.8	0.994937				Classical Complement Pathway	0.51942	0.0186992	0.210526	0.947368	0.894737	2.59075		Alternative Complement Pathway		TTC19	0.153625	0.0444093	0	0.175666	0.326531	0.700231
	T Cell	0.220489	0.0435021	0.334528	0	0.371429	0.969948				Cell Cycle	0.56889	0.0693572	0.526316	0.421053	0.947368	2.53298		Apoptosis		HMMR	0.100043	0.0103288	0	0.0891562	0.5	0.699528
	Fatty Acid Alpha Oxidation	0.0416442	0	0.0526394	1.03513e-05	0.857143	0.951437				Pentose Phosphate Signature	0.930936	1	0.0526316	0.0526316	0.368421	2.40462		CD40 Activated B Cell		ZWINT	0.151529	0.0265902	0	0.245884	0.27551	0.699513
	TNF	0.168481	0.0388749	0.23706	0	0.485714	0.93013				CD40 Activated B Cell	0	0.0327847	1	0.368421	0.842105	2.24331		Cell Cycle		CENPM	0.0608016	0.00393649	0	0.0116616	0.612245	0.688645
	Anti inflammation	0.157351	0.065481	0.0480882	0.0480232	0.6	0.918944				Apoptosis	0.474771	0.00551311	0.263158	0.842105	0.631579	2.21713		Classical Complement Pathway		TKTL1	0.273235	0.00757979	0	0.00297484	0.397959	0.681749
	IFN	0.0909155	0.010901	0.0428412	0.013607	0.742857	0.901122				IFN	0.197656	0.00831242	0.368421	0.631579	1	2.20597		IFN		MCEMP1	0.276732	0.108938	0	0.100968	0.183673	0.670311
	Treg	0.0227879	0.00127385	0.105217	1.27462e-06	0.771429	0.900708				T Cell	0.5116	0.00846041	0.684211	0.263158	0.684211	2.15164		Pentose Phosphate Signature		MTHFD2	0.124921	0.00304903	0	0.417397	0.122449	0.667816
	pDC	0.156289	0.112481	0	0.0633849	0.457143	0.789298				Alternative Complement Pathway	0.623285	0.0202815	0.473684	1	0	2.11725		T Cell		SLC25A4	0.187089	0.0198799	0	0.00458384	0.44898	0.660533
	Tactivated	0.280462	0.0187735	0.055753	0.00915214	0.4	0.764141				Unfolded Protein	0.567554	0.00126214	0.315789	0.315789	0.789474	1.98987		Unfolded Protein		MZB1	0.147296	0.00317737	0	0.376665	0.112245	0.639383
	Unfolded Protein	0.258841	0.0310533	0.172167	0.000693912	0.171429	0.634184				Proinflammatory IL-1 Family	0.349756	0.354112	0.631579	0.473684	0.157895	1.96703				MSH6	0.261503	0.00203269	0	0.21123	0.132653	0.607419
	TCA cycle	0.178308	0.00505939	0.16816	0.0253844	0.228571	0.605483				Amino Acid Metabolism	0.0668454	0.252189	0.894737	0.105263	0.578947	1.89798				AURKA	0.0155705	0.00300516	0	0.0466872	0.530612	0.595875
	NFkB Complex	0.0592248	0.0707755	0.386987	0.00238722	0.0571429	0.576518				Fatty Acid Beta Oxidation	0.0255538	0.0281537	0.842105	0.526316	0.473684	1.89581				SLFN5	0.0131371	0	0	0.129704	0.438776	0.581616
	NLRP3 Inflammasome	0.0603977	0.0733171	0.309732	0.000115611	0.114286	0.557848				Anti inflammation	0.447501	0	0.421053	0.894737	0.0526316	1.81592				TOP2A	0.148341	0.038227	0	0.017389	0.377551	0.581508
	Monocyte	0.234848	0.0131805	0.246343	9.42416e-06	0.0285714	0.522952				Oxidative Phosphorylation	0.746566	0.0226426	0.578947	0.210526	0.210526	1.76921				LMNB1	0.105317	0.0828313	0	0.188167	0.193878	0.570192
	NK Cell	0	0.0290638	0.0364521	0.0388645	0.0857143	0.190095				Tactivated	0.113784	0.00016742	0.157895	0.684211	0.736842	1.6929				ASPM	0.14889	0.0604591	0	0.0891722	0.265306	0.563828
6		LR	RF	LDA	GB	SVM	Overall		Top 20 Features		Anergic / Activated T cells	0.106628	0.0118814	0.947368	0.157895	0.421053	1.64483				SCO2	0.00659357	0.00556044	0	0.0643767	0.469388	0.545918
	Cell Cycle	1	1	0.317813	1	0.8	4.11781		Alternative Complement Pathway		MHC II	0.162	0.0436684	0.105263	0.736842	0.526316	1.57409				MCM2	0.106006	0.0312352	0	0.225838	0.163265	0.526345
	Pentose Phosphate Signature	0.805155	0.51688	1	0.0489056	1	3.37094		Amino Acid Metabolism		Plasma Cell	0.149021	0.0894228	0.736842	0	0.263158	1.23844				BAD	0.0610694	0.046891	0	0.0731407	0.336735	0.517836
	Amino Acid Metabolism	0.360188	0.324612	0.0185685	0.0547264	0.942857	1.70095		Anergic / Activated T cells		Glycolysis	0.0728234	0.00138999	0	0.578947	0.105263	0.758424				NDUFS1	0.0900854	0.0201678	0	0.35764	0.0408163	0.508709
	Plasma Cell	0.799919	0.455723	0.115336	0.00364672	0.228571	1.6032		Anti inflammation			RF	ADB	LDA	GB	SVM	Overall		Top 10 Features		MTPN	0.253413	0.00795634	0	0.011675	0.214286	0.48733
	Apoptosis	0.221204	0.0440378	0.454334	6.86152e-05	0.857143	1.57679		Apoptosis		Pentose Phosphate Signature	0.798666	1	0.990246	0.2885	0.894737	3.97215		Alternative Complement Pathway		PRPS2	0.0998141	0.0331501	0	0.0702606	0.255102	0.458327
	Alternative Complement Pathway	0.799824	0.280781	0.405978	0.0600401	0	1.54662		CD40 Activated B Cell		Plasma Cell	1	0.272727	0.475887	1	0.631579	3.38019		Anergic / Activated T cells		TYMS	0.0988829	0.00410051	0	0.0360929	0.316327	0.455403
	Oxidative Phosphorylation	0.43468	0.038965	0.630283	0.00555935	0.428571	1.53806		Cell Cycle		Alternative Complement Pathway	0.527904	0.181818	0.605471	0.167615	1	2.48281		CD40 Activated B Cell		NDUFA2	0.127606	0.00391624	0	0.205763	0.0918367	0.429122
	Granulocyte	0.14486	0.0695331	0.303195	7.22504e-05	0.971429	1.48909		Classical Complement Pathway		Cell Cycle	0.867072	0.0909091	0.355004	0.145748	0.526316	1.98505		Cell Cycle		VSIG4	0.0653527	0.00619634	0	0.0181443	0.285714	0.375408
	Unfolded Protein	0.290455	0.0579658	0.30409	0.0160375	0.742857	1.41141		Fatty Acid Beta Oxidation		T Cell	0.332385	0.363636	0.480846	0.00499614	0.684211	1.86607		Inflammatory_Neutrophil		C3AR1	0.0276119	0.00395406	0	0.0321056	0.295918	0.35959
	Tactivated	0.429919	0.0575287	0.117239	7.32806e-05	0.771429	1.37619		Granulocyte		Oxidative Phosphorylation	0.170738	0.363636	1	0.00725064	0.315789	1.85741		Oxidative Phosphorylation		C5	0.16266	0.030641	0	0.127433	0.0204082	0.341142
	Anti inflammation	0.0544677	0.16971	0.223121	0	0.885714	1.33301		IFN		CD40 Activated B Cell	0.378791	0.0909091	0.257306	0.00348017	0.947368	1.67785		Pentose Phosphate Signature		ARG1	0.0955929	0.0316771	0	0.0492348	0.153061	0.329566
	CD40 Activated B Cell	0.259847	0.134786	0.0861262	0.000170662	0.828571	1.3095		LDG		Inflammatory_Neutrophil	0.202908	0.454545	0.301124	0.117615	0.578947	1.65514		Plasma Cell		NDUFB6	0.0845213	0.0433768	0	0.132511	0.0510204	0.311429
	pDC	0.361768	0.234128	0.0762328	0.397167	0.2	1.2693		MHC II		Proinflammatory IL-1 Family	0.298977	0.0909091	0.247592	0.0107726	0.789474	1.43772		Proinflammatory IL-1 Family		MCM10	0.0757693	0.0048606	0	0.00035579	0.173469	0.254455
	LDG	0.436097	0.0554197	0.20021	0.00150946	0.4	1.09324		Oxidative Phosphorylation		Anergic / Activated T cells	0	0	0.417587	0.00047624	0.842105	1.26017		T Cell		AASS	0	0	0	0.00330911	0.22449	0.227799
	Anergic / Activated T cells	0.117355	0.0268251	0.0011355	0.0267718	0.914286	1.08637		pDC		TCA cycle	0.0906101	0.272727	0.118344	0.0398861	0.736842	1.25841					LR	RF	ADB	SVM	NB	Overall		Top 20 Genes
	Platelets	0.565394	0.0916068	0.135025	0.0152438	0.257143	1.06441		Pentose Phosphate Signature		Fatty Acid Beta Oxidation	0.0141588	0	0.923884	0.0311696	0.210526	1.17974				COX7B	1	1	1	0.765306	0.846939	4.61224		CASP3
	Classical Complement Pathway	0	0.0834329	0.262361	0.00024428	0.714286	1.06032		Plasma Cell		Cytotoxic, Activated T Cell	0.096127	0.181818	0.739251	0.0857713	0.0526316	1.1556				UQCRB	0.895109	0.864295	0.625	0.285714	0.979592	3.64971		CCNB1
	Fatty Acid Beta Oxidation	0.0377539	0.0229796	0.447502	0.000345743	0.542857	1.05144		Platelets		IFN	0.0797362	0.181818	0.117709	0.362778	0.368421	1.11046				CEP55	0.772608	0.207099	0.625	0.612245	0.928571	3.14552		CCNE1
	MHC II	0.416445	0.160899	0.169849	0.261768	0.0285714	1.03753		Tactivated		Apoptosis	0.20411	0	0.449854	0.0280807	0.421053	1.1031				COX7C	0.630246	0.57275	0	0.734694	0.836735	2.77442		CD177
	IFN	0.119194	0.0543679	0.344199	0.018674	0.457143	0.993578		Unfolded Protein		Amino Acid Metabolism	0.612078	0.272727	0	0.0305678	0.157895	1.07327				DUSP4	0.555456	0.0533	0.25	0.918367	0.795918	2.57304		CDC20
	Dendritic Cell	0.086849	0.00965119	0.264989	0	0.628571	0.990061				ROS Protection	0.162331	0.272727	0.120948	0	0.473684	1.02969				DNAJC15	0.38941	0.182634	0.25	0.928571	0.806122	2.55674		CEP55
	Cytotoxic, Activated T Cell	0.205056	0.0395853	0.0755628	2.6537e-10	0.657143	0.977347				NFkB Complex	0.0731338	0.363636	0.438763	0.0146422	0	0.890175				PTTG1	0.464455	0.0584101	0	0.989796	1	2.51266		CFD
	Proinflammatory IL-1 Family	0.418188	0.0867934	0.138655	0.0173887	0.314286	0.975311				Unfolded Protein	0.279183	0.0909091	0.102342	0.0114801	0.263158	0.747072				CLEC4D	0.72725	0.0512894	0.125	0.602041	0.877551	2.38313		CFL1
	Treg	0.183375	0.0303288	0.0421414	0.00675124	0.685714	0.94831				Fatty Acid Alpha Oxidation	0.00115968	0	0.283623	0.00438627	0.105263	0.394433				H2BC21	0.452154	0.455016	0.5	0.77551	0.183673	2.36635		CLEC4D
	T Cell	0.260327	0.0519323	0.108995	0.0106871	0.371429	0.80337														CDC20	0.513604	0.144115	0	0.704082	0.94898	2.31078		COX7B
	ROS Protection	0.167416	0.0751463	0.201767	9.94529e-05	0.342857	0.787286														CFL1	0.617329	0.152547	0	0.642857	0.887755	2.30049		COX7C
	Monocyte	0.0289634	0.0280441	0.639876	0.0194824	0.0571429	0.773509														CASP3	0.393843	0.182653	0.25	0.357143	0.989796	2.17343		CR1
	Fatty Acid Alpha Oxidation	0.055655	0.0189395	0.0961277	0	0.571429	0.742151														CD177	0.381126	0.033122	0	0.979592	0.755102	2.14894		DNAJC15
	Erythrocytes	0.0364124	0.0596094	0.0347091	0.000129195	0.6	0.73086														TMEM126B	0.553311	0.820311	0	0.367347	0.357143	2.09811		DUSP4
	TNF	0.125707	0.0490772	0.248335	8.94341e-09	0.285714	0.708833														CCNE1	0.348976	0.0277742	0	0.969388	0.744898	2.09104		E2F3
	Inflammatory_Neutrophil	0.0716037	0.110111	0.0286547	0.00019843	0.485714	0.696282														FAS	0.316554	0.109984	0	0.877551	0.77551	2.0796		FAS
	Glycolysis	0.030781	0.0723535	0.0394573	0.000765904	0.514286	0.657643														E2F3	0.34241	0.0351733	0	0.887755	0.785714	2.05105		H2BC21
	NLRP3 Inflammasome	0.111581	0.0743537	0.244314	0.00819922	0.142857	0.581305														CR1	0.248119	0	0	0.94898	0.826531	2.02363		PTTG1
	TCA cycle	0.1547	0.0322913	0.0445582	0	0.171429	0.402978														CFD	0.382845	0	0	0.673469	0.918367	1.97468		TMEM126B
	NFkB Complex	0.0630151	0.0627751	0	0	0.0857143	0.211504														CCNB1	0.345575	0.347286	0.125	0.520408	0.602041	1.94031		UQCRB
	NK Cell	0.0692632	0	0.0256894	7.93984e-07	0.114286	0.209239														H2BC5	0.691502	0.166431	0.25	0.581633	0.173469	1.86304
7		LR	RF	ADB	LDA	SVM	Overall		Top 20 Features												CCNB2	0.805147	0.122517	0.125	0.0510204	0.734694	1.83838
	Pentose Phosphate Signature	0.814498	0.558311	1	1	0.342857	3.71567		Alternative Complement Pathway												COX20	0.179717	0.0594635	0	0.714286	0.857143	1.81061
	Cell Cycle	0.957642	1	0.4	0.393716	0.542857	3.29422		Amino Acid Metabolism												CYCS	0.00768065	0.00457498	0	0.938776	0.816327	1.76736
	Alternative Complement Pathway	0.875149	0.289572	0.6	0.484831	1	3.24955		Anti inflammation												CAST	0.0542365	0.0653404	0.25	0.908163	0.469388	1.74713
	Plasma Cell	1	0.589032	0.1	0.111508	0.8	2.60054		Apoptosis												NDUFA5	0.579364	0.908865	0.125	0.102041	0.0102041	1.72547
	Oxidative Phosphorylation	0.529284	0.090223	0.4	0.565359	0.0571429	1.64201		CD40 Activated B Cell												FKBP5	0.0608426	0.00892875	0	0.867347	0.765306	1.70242
	Amino Acid Metabolism	0.525229	0.395902	0	0	0.685714	1.60685		Cell Cycle												COX18	0.132535	0.00462476	0	0.693878	0.867347	1.69838
	LDG	0.394674	0.0339957	0.1	0.195162	0.857143	1.58097		Classical Complement Pathway												CD58	0.170678	0.076491	0	0.479592	0.969388	1.69615
	Proinflammatory IL-1 Family	0.440404	0.144579	0.1	0.165681	0.714286	1.56495		Cytotoxic, Activated T Cell												C3	0.404851	0.0169457	0	0.653061	0.591837	1.6667
	Anti inflammation	0.234393	0.157553	0.2	0.301659	0.628571	1.52218		Fatty Acid Beta Oxidation												AURKA	0.0469453	0.0128922	0	0.959184	0.632653	1.65167
	pDC	0.265364	0.216313	0	0.0712977	0.942857	1.49583		LDG												GINS2	0.294135	0.00892875	0	0.836735	0.5	1.6398
	Monocyte	0.0410722	0.0165256	0	0.544391	0.885714	1.4877		MHC II												CARD16	0.566921	0.141382	0.125	0.265306	0.530612	1.62922
	Apoptosis	0.268177	0.0572459	0	0.466952	0.6	1.39237		Monocyte												CFH	0.0253275	0.0344917	0	0.663265	0.897959	1.62104
	NLRP3 Inflammasome	0.0778382	0.0685606	0	0.291584	0.914286	1.35227		NLRP3 Inflammasome												WEE1	0.014102	0.020191	0	1	0.581633	1.61593
	Cytotoxic, Activated T Cell	0.177077	0.0509754	0	0.108175	0.971429	1.30766		Oxidative Phosphorylation												NDUFAF7	0.428475	0.350732	0.5	0.0816327	0.244898	1.60574
	TCA cycle	0.283138	0.0453019	0.1	0.0988842	0.742857	1.27018		pDC												CASP7	0.172523	0.0373641	0	0.897959	0.489796	1.59764
	Fatty Acid Beta Oxidation	0.00730089	0.0731684	0	0.344503	0.828571	1.25354		Pentose Phosphate Signature												SOCS3	0.224774	0.0223779	0	0.428571	0.908163	1.58389
	Classical Complement Pathway	0.0279177	0.123331	0.2	0.328186	0.514286	1.19372		Plasma Cell												TPX2	0.474759	0.215275	0	0.326531	0.540816	1.55738
	Unfolded Protein	0.390661	0.147297	0.1	0.381312	0.171429	1.1907		Proinflammatory IL-1 Family												GBP4	0.156053	0.0128394	0	0.857143	0.459184	1.48522
	MHC II	0.398848	0.205964	0.2	0.161666	0.2	1.16648		TCA cycle												ARG1	0.0928978	0.0460744	0	0.683673	0.653061	1.47571
	CD40 Activated B Cell	0.245203	0.162369	0	0.183038	0.571429	1.16204		Unfolded Protein												CAPZA1	0.198054	0.0647445	0	0.622449	0.55102	1.43627
	Inflammatory_Neutrophil	0.190871	0.117896	0.4	0.121005	0.257143	1.08692														GBP5	0.121569	0	0	0.846939	0.44898	1.41749
	TNF	0.178469	0.061075	0	0.351253	0.485714	1.07651														APAF1	0.213546	0	0	0.510204	0.663265	1.38702
	ROS Protection	0.276987	0.0842371	0.3	0.174396	0.228571	1.06419														LAP3	0.417125	0.0258011	0	0.5	0.438776	1.3817
	Anergic / Activated T cells	0.162936	0.0356878	0.1	0.0335381	0.657143	0.989304														HMGB2	0.366843	0.112365	0	0.744898	0.153061	1.37717
	IFN	0.188119	0.0445418	0	0.388961	0.285714	0.907336														C5	0.152256	0.00455439	0	0.632653	0.561224	1.35069
	Treg	0.0617312	0.0357204	0	0.0226635	0.771429	0.891544														HIF1A	0.425634	0.00494701	0	0.755102	0.163265	1.34895
	Tactivated	0.53088	0.0507544	0.1	0.104968	0.0285714	0.815173														ANXA3	0.123334	0.00437231	0	0.540816	0.673469	1.34199
	Granulocyte	0.133032	0.0866835	0	0.263831	0.314286	0.797833														ZWINT	0.097695	0	0	0.27551	0.959184	1.33239
	T Cell	0.289842	0.0550953	0.2	0.118375	0.0857143	0.749026														BRCA1	0	0.0132461	0	0.591837	0.72449	1.32957
	Platelets	0.45733	0.0889062	0	0.176933	0	0.723169														SLC25A4	0.181271	0.0112211	0	0.44898	0.683673	1.32515
	Dendritic Cell	0.0159597	0.0443879	0	0.181414	0.457143	0.698904														H2AC6	0.218106	0.0743157	0	0.785714	0.193878	1.27201
	Glycolysis	0.0150948	0.0518708	0.2	0.0589316	0.371429	0.697326														SDC1	0.439448	0.0805005	0	0.459184	0.285714	1.26485
	Erythrocytes	0.0830285	0.106263	0	0.0780652	0.428571	0.695928														NDUFAF5	0.479785	0.199036	0.375	0.0918367	0.112245	1.2579
	Fatty Acid Alpha Oxidation	0.0159895	0	0	0.102674	0.4	0.518663														GLUD1	0.00161978	0	0	0.826531	0.428571	1.25672
	NK Cell	0.0497313	0.0596591	0.1	0.00485177	0.114286	0.328528														WSB2	0.234543	0	0.25	0.387755	0.346939	1.21924
	NFkB Complex	0	0.0308947	0.1	0.0337713	0.142857	0.307523														HMMR	0.212586	0.125706	0	0.72449	0.142857	1.20564
8		RF	LDA	GB	SVM	NB	Overall		Top 20 Features												GZMM	0.184038	0.0197843	0	0.795918	0.204082	1.20382
	Pentose Phosphate Signature	0.834689	0.974182	1	0.457143	0.228571	3.49458		Alternative Complement Pathway												GPT2	0.138744	0.00854125	0	0.816327	0.22449	1.1881
	Cell Cycle	1	0.380727	6.16701e-10	0.714286	0.685714	2.78073		Amino Acid Metabolism												TYMS	0.122426	0.021813	0	0.306122	0.704082	1.15444
	Inflammatory_Neutrophil	0.11724	0.263174	0.143586	0.914286	0.971429	2.40971		Anti inflammation												NT5C3A	0.424639	0.00461226	0.25	0.0408163	0.418367	1.13844
	Alternative Complement Pathway	0.413197	0.609122	0.0615832	0.828571	0.485714	2.39819		Apoptosis												BUB1B	0.0470699	0.0984637	0	0.377551	0.612245	1.13533
	Amino Acid Metabolism	0.864882	0.0194867	0.16753	0.8	0.542857	2.39476		Cell Cycle												TKTL1	0.294962	0.00935435	0	0.408163	0.377551	1.09003
	TNF	0.0184912	0.782244	0	0.6	0.714286	2.11502		Classical Complement Pathway												GSTK1	0.0306042	0.0345778	0	0.806122	0.214286	1.08559
	LDG	0.0220233	0.205372	0.000494076	0.885714	1	2.1136		Cytotoxic, Activated T Cell												TTC19	0.19068	0.0564364	0	0.316327	0.520408	1.08385
	Apoptosis	0.117322	0.260684	0	1	0.628571	2.00658		Dendritic Cell												ANXA1	0.257602	0.103466	0	0.0204082	0.693878	1.07535
	IFN	0.0357345	0.20899	0	0.942857	0.771429	1.95901		Erythrocytes												BAD	0.0577643	0.0213536	0	0.346939	0.622449	1.04851
	Oxidative Phosphorylation	0.101819	1	0.0244147	0.514286	0.2	1.84052		Fatty Acid Beta Oxidation												ADD3	0.0653918	0.00435824	0	0.22449	0.714286	1.00853
	Classical Complement Pathway	0.0559252	0.389685	0.0186017	0.857143	0.514286	1.83564		Glycolysis												VSIG4	0.0716763	0.0163701	0	0.397959	0.510204	0.99621
	Glycolysis	0.0991378	0.0234411	0.000560197	0.742857	0.914286	1.78028		Granulocyte												CENPM	0.0159677	0.028926	0	0	0.938776	0.983669
	Fatty Acid Beta Oxidation	0.0676342	0.444828	0.00220421	0.285714	0.885714	1.6861		IFN												C3AR1	0.0673501	0.0135812	0	0.295918	0.571429	0.948278
	Erythrocytes	0.0905017	0.0478766	1.14181e-17	0.685714	0.828571	1.65266		Inflammatory_Neutrophil												SLFN5	0.0203832	0.00880356	0	0.438776	0.479592	0.947554
	Cytotoxic, Activated T Cell	0.0371195	0.441958	0.0144847	0.371429	0.742857	1.60785		LDG												ASPM	0.148984	0	0	0.153061	0.642857	0.944903
	pDC	0.0534342	0.0793187	0.0145341	0.971429	0.457143	1.57586		Monocyte												RPE	0.172104	0.00632051	0	0.489796	0.265306	0.933527
	Dendritic Cell	0.0273206	0.113142	0	0.542857	0.8	1.48332		Oxidative Phosphorylation												IL1RN	0.196443	0.0233677	0	0.571429	0.132653	0.923892
	Anti inflammation	0.136103	0.239251	0.0121565	0.428571	0.6	1.41608		pDC												SCO2	0.170916	0.00750502	0	0.469388	0.27551	0.923319
	Monocyte	0	0.727111	0	0.657143	0.0285714	1.41283		Pentose Phosphate Signature												THEMIS2	0.0238939	0.021325	0	0.561224	0.295918	0.902362
	Granulocyte	0.0533785	0.235689	0.00136144	0.142857	0.942857	1.37614		TNF												PGD	0.239661	0.0375725	0	0.214286	0.387755	0.879274
	ROS Protection	0.339483	0.328273	0	0.314286	0.342857	1.3249														MKI67	0.457025	0.15067	0	0.173469	0.0714286	0.852593
	CD40 Activated B Cell	0.346141	0.270986	0.00237214	0.0285714	0.657143	1.30521														TOP2A	0.13021	0.00902283	0	0.336735	0.336735	0.812703
	Plasma Cell	0.532658	0.367603	0.0438904	0.0857143	0.257143	1.28701														LMNB1	0.0718486	0.0413523	0	0.55102	0.122449	0.78667
	Proinflammatory IL-1 Family	0.325956	0.250291	0.0301778	0.342857	0.314286	1.26357														SPTLC2	0.0144746	0.0177872	0	0.418367	0.306122	0.756752
	Fatty Acid Alpha Oxidation	0.0849888	0.0683062	0.022968	0.171429	0.857143	1.20483														PSAT1	0.0939297	0.0184652	0	0.255102	0.367347	0.734844
	Unfolded Protein	0.0760239	0.386317	0.00266884	0.485714	0.171429	1.12215														PRDX3	0.116112	0.00459063	0	0.234694	0.326531	0.681927
	Platelets	0.0644439	0.23641	0.00841621	0.4	0.285714	0.994985														NDUFS1	0.0704505	0.0134942	0.25	0.0612245	0.255102	0.650271
	T Cell	0.140188	0.187039	0	0.257143	0.4	0.98437														PRPS2	0.0386479	0.00314865	0	0.244898	0.316327	0.603021
	NFkB Complex	0.0401173	0.208069	0	0.628571	0.0571429	0.933901														AASS	0.0649494	0	0	0.530612	0	0.595562
	Treg	0.0400064	0.0223535	0.00806702	0.771429	0	0.841855														MCEMP1	0.196787	0.0786881	0	0.204082	0.102041	0.581598
	NK Cell	0.0671413	0.0719227	0	0.571429	0.0857143	0.796207														MSH6	0.333015	0.00236149	0	0.163265	0.0612245	0.559867
	Anergic / Activated T cells	0.131792	0.0518988	0.00353481	0	0.571429	0.758654														OXCT1	0.0995617	0	0	0.0102041	0.397959	0.507725
	MHC II	0.0909624	0.181861	0	0.0571429	0.428571	0.758538														MZB1	0.220193	0.0806227	0	0.122449	0.0306122	0.453877
	Tactivated	0.0635155	0.0736509	0	0.228571	0.371429	0.737166														OAT	0.00259293	0.0119902	0	0.0306122	0.408163	0.453359
	TCA cycle	0.0671387	0.152542	0.00175488	0.2	0.142857	0.564293														MCM10	0.0975811	0.0656089	0	0.193878	0.0918367	0.448904
	NLRP3 Inflammasome	0.0474077	0	0.0116038	0.114286	0.114286	0.287583														MTHFD2	0.209163	0.00938826	0	0.142857	0.0510204	0.412429
9		LR	RF	ADB	LDA	SVM	Overall		Top 20 Features												NDUFB6	0.0696538	0.020221	0	0.0714286	0.234694	0.395997
	Cell Cycle	1	1	0.181818	0.381007	0.8	3.36283		Alternative Complement Pathway												MCM2	0.0512199	0.0716783	0	0.183673	0.0816327	0.388204
	Pentose Phosphate Signature	0.792921	0.533606	1	1	0.0285714	3.3551		Amino Acid Metabolism												MTPN	0.190616	0.0131001	0	0.132653	0.0408163	0.377186
	Amino Acid Metabolism	0.429782	0.481456	0.181818	0.012261	0.942857	2.04817		Anergic / Activated T cells												NDUFA2	0.134336	0.0135563	0	0.112245	0.0204082	0.280546
	Oxidative Phosphorylation	0.592139	0.0510885	0.363636	0.710713	0.0857143	1.80329		Anti inflammation													LR	RF	LDA	SVM	NB	Overall		Top 20 Genes
	Apoptosis	0.279918	0.00211002	0.0909091	0.536598	0.857143	1.76668		Apoptosis												COX7B	1	1	0.0452291	0.938776	0.826531	3.81054		C3
	Anti inflammation	0.274854	0.139782	0.0909091	0.317664	0.885714	1.70892		CD40 Activated B Cell												UQCRB	0.938887	0.769811	0.33466	0.897959	0.591837	3.53315		CCNB1
	Plasma Cell	0.918398	0.522908	0	0.110271	0.142857	1.69443		Cell Cycle												COX7C	0.646155	0.661836	0.282684	0.928571	0.816327	3.33557		CCNB2
	Alternative Complement Pathway	0.689398	0.15849	0.272727	0.495929	0	1.61654		Classical Complement Pathway												CEP55	0.91126	0.245055	0.34572	0.612245	0.897959	3.01224		CCNE1
	IFN	0.0971427	0.0293996	0	0.38553	1	1.51207		Fatty Acid Beta Oxidation												DNAJC15	0.402186	0.231237	0.517646	0.887755	0.867347	2.90617		CD177
	Proinflammatory IL-1 Family	0.436933	0.125667	0	0.193203	0.714286	1.47009		Glycolysis												CCNB2	0.899886	0.231505	0.218519	0.571429	0.77551	2.69685		CD58
	MHC II	0.382319	0.165868	0.363636	0.186193	0.342857	1.44087		IFN												TPX2	0.576451	0.297781	0.0173627	0.836735	0.704082	2.43241		CDC20
	T Cell	0.393939	0.0576289	0.363636	0.176281	0.428571	1.42006		MHC II												CLEC4D	0.727167	0.0450896	0.00933893	0.734694	0.857143	2.37343		CEP55
	CD40 Activated B Cell	0.223069	0.146573	0	0.166143	0.828571	1.36436		Oxidative Phosphorylation												TMEM126B	0.582684	0.694371	0.230081	0.469388	0.377551	2.35407		CFD
	Glycolysis	0.0347548	0.101758	0.181818	0.0588753	0.971429	1.34863		Pentose Phosphate Signature												CYCS	0.0594031	0	0.552251	0.908163	0.795918	2.31574		CLEC4D
	Unfolded Protein	0.321314	0.050481	0	0.276352	0.685714	1.33386		Plasma Cell												CDC20	0.478133	0.139173	0.159314	0.581633	0.928571	2.28682		COX7B
	TNF	0.111188	0.0384748	0	0.399585	0.771429	1.32068		Proinflammatory IL-1 Family												E2F3	0.369784	0.0342813	0.462159	0.867347	0.5	2.23357		COX7C
	Fatty Acid Beta Oxidation	0.155834	0.0373453	0	0.574089	0.514286	1.28155		T Cell												H2BC21	0.44862	0.564884	0.350394	0.72449	0.142857	2.23124		CYCS
	Tactivated	0.525489	0.070966	0.272727	0.153334	0.228571	1.25109		Tactivated												CCNE1	0.413896	0.0360925	0.103101	0.653061	0.969388	2.17554		DNAJC15
	Classical Complement Pathway	0.0377203	0.152958	0.0909091	0.282987	0.657143	1.22172		TNF												C3	0.433666	0.0435422	0.0636267	0.622449	0.989796	2.15308		DUSP4
	Anergic / Activated T cells	0.190175	0.0388052	0	0.017632	0.914286	1.1609		Unfolded Protein												CCNB1	0.331051	0.239338	0.176259	0.591837	0.755102	2.09359		E2F3
	LDG	0.455395	0.0163512	0.0909091	0.199083	0.371429	1.13317														CFD	0.389614	0.0108668	0.131794	0.663265	0.887755	2.0833		H2BC21
	ROS Protection	0.0654191	0.060308	0.0909091	0.171048	0.742857	1.13054														DUSP4	0.675787	0.0608044	0.057614	0.877551	0.408163	2.07992		TMEM126B
	Platelets	0.529345	0.0832927	0.0909091	0.182526	0.171429	1.0575														CD58	0.214847	0.133081	0.138729	0.632653	0.938776	2.05808		TPX2
	Monocyte	0.025151	0.0036353	0	0.711109	0.314286	1.05418														CD177	0.41255	0.0347927	0.0174916	0.642857	0.94898	2.05667		UQCRB
	Cytotoxic, Activated T Cell	0.182395	0.0456714	0.0909091	0.106378	0.628571	1.05392														CR1	0.187609	0.0184551	0.120909	0.918367	0.806122	2.05146
	Dendritic Cell	0.0762912	0.0360268	0	0.269788	0.6	0.982105														SDC1	0.547458	0.158947	0.190041	0.428571	0.72449	2.04951
	Granulocyte	0.129253	0.0654901	0	0.308385	0.457143	0.96027														COX20	0.153286	0.0729942	0.0335121	0.94898	0.836735	2.04551
	Inflammatory_Neutrophil	0.12417	0.149917	0.181818	0	0.4	0.855906														CASP7	0.130367	0.00376612	0.804243	0.55102	0.55102	2.04042
	Fatty Acid Alpha Oxidation	0.0391564	0.0147152	0.0909091	0.154798	0.542857	0.842435														HMGB2	0.381348	0.0569392	0.519241	0.989796	0.0918367	2.03916
	pDC	0.279841	0.177936	0.0909091	0.0898233	0.114286	0.752794														COX18	0.151647	0.0129284	0.0184495	0.969388	0.846939	1.99935
	NLRP3 Inflammasome	0.0384946	0.0637891	0.181818	0.264245	0.2	0.748347														PRDX3	0.0825277	0.00596757	1	0.285714	0.622449	1.99666
	Erythrocytes	0.0571854	0.0351767	0	0.0562034	0.571429	0.719994														MSH6	0.304542	0	0.152702	0.530612	1	1.98786
	TCA cycle	0.163216	0.0363106	0.0909091	0.0398668	0.285714	0.616016														BRCA1	0.0255547	0.0142498	0.847509	0.520408	0.571429	1.97915
	Treg	0	0	0.0909091	0.0315585	0.485714	0.608182														PTTG1	0.457848	0.193918	0.118576	0.489796	0.653061	1.9132
	NFkB Complex	0.0297638	0.041694	0	0.0163704	0.257143	0.344971														NDUFAF5	0.503027	0.194877	0.843574	0.0510204	0.316327	1.90882
	NK Cell	0.0154686	0.0129375	0	0.0292411	0.0571429	0.11479														CARD16	0.590978	0.170141	0.0100467	0.673469	0.44898	1.89361
10		LR	RF	LDA	SVM	NB	Overall		Top 20 Features												OXCT1	0.149468	0.046143	0.645929	1	0.0306122	1.87215
	Cell Cycle	1	1	0.445299	0.8	0.6	3.8453		Alternative Complement Pathway												SOCS3	0.207245	0.0168156	0.280103	0.459184	0.908163	1.87151
	Plasma Cell	0.88023	0.55869	0.334526	0.0571429	0.685714	2.5163		Amino Acid Metabolism												ASPM	0.109772	0.0260976	0.13154	0.959184	0.612245	1.83884
	Oxidative Phosphorylation	0.598842	0.0676313	1	0.228571	0.542857	2.4379		Anergic / Activated T cells												FAS	0.363677	0.0920331	0.112842	0.857143	0.387755	1.81345
	Pentose Phosphate Signature	0.765515	0.553493	0.969311	0.0285714	0.0857143	2.4026		Apoptosis												CFH	0.00328398	0.0330344	0.287098	0.714286	0.765306	1.80301
	Amino Acid Metabolism	0.500475	0.508769	0.0796046	0.942857	0.285714	2.31742		CD40 Activated B Cell												H2BC5	0.714243	0.0892276	0.0455549	0.755102	0.132653	1.73678
	CD40 Activated B Cell	0.239376	0.227319	0.303225	0.828571	0.657143	2.25563		Cell Cycle												CENPM	0.00177441	0.00465005	0.0862233	0.704082	0.918367	1.7151
	Inflammatory_Neutrophil	0.111213	0.151536	0.157386	1	0.771429	2.19156		Cytotoxic, Activated T Cell												NDUFA5	0.598784	0.556659	0.188138	0.0612245	0.285714	1.69052
	Apoptosis	0.272551	0.04878	0.398065	0.857143	0.485714	2.06225		Fatty Acid Alpha Oxidation												APAF1	0.244078	0.00903304	0.378025	0.357143	0.663265	1.65154
	Fatty Acid Beta Oxidation	0.0901944	0.0336731	0.493099	0.542857	0.885714	2.04554		Fatty Acid Beta Oxidation												CFL1	0.620603	0.0971671	0.0551675	0	0.877551	1.65049
	Anergic / Activated T cells	0.12559	0.0310388	0.13041	0.914286	0.828571	2.0299		IFN												CASP3	0.377503	0.0691929	0.220198	0.540816	0.438776	1.64649
	Alternative Complement Pathway	0.789492	0.210323	0.718862	0	0.142857	1.86153		Inflammatory_Neutrophil												NDUFAF7	0.435632	0.391032	0.0592745	0.0408163	0.683673	1.61043
	ROS Protection	0.194751	0.115904	0.392886	0.142857	1	1.8464		NFkB Complex												TTC19	0.212188	0.0987391	0.0935306	0.683673	0.520408	1.60854
	Proinflammatory IL-1 Family	0.518616	0.148089	0.270959	0.114286	0.714286	1.76624		Oxidative Phosphorylation												OAT	0.0213905	0.0390686	0.924827	0.255102	0.357143	1.59753
	Unfolded Protein	0.356065	0.06821	0.433718	0.714286	0.171429	1.74371		Pentose Phosphate Signature												C3AR1	0.0931216	0.00918157	0.0241857	0.979592	0.489796	1.59588
	NFkB Complex	0.0934079	0.0346843	0.335919	0.314286	0.942857	1.72115		Plasma Cell												ZWINT	0.0409805	0.000652491	0.28403	0.306122	0.959184	1.59097
	IFN	0.145703	0.040919	0.128196	0.457143	0.914286	1.68625		Proinflammatory IL-1 Family												CAPZA1	0.238589	0.0179669	0.176404	0.693878	0.459184	1.58602
	Fatty Acid Alpha Oxidation	0.04088	0.0256284	0.0565055	0.571429	0.971429	1.66587		ROS Protection												ANXA1	0.266237	0.17463	0.33331	0.0204082	0.714286	1.50887
	T Cell	0.263718	0.00893294	0.181446	0.742857	0.457143	1.6541		T Cell												GBP4	0.133262	0.010059	0.0905327	0.826531	0.397959	1.45834
	Cytotoxic, Activated T Cell	0.182341	0.0675343	0.317168	0.657143	0.428571	1.65276		TCA cycle												GINS2	0.327247	0.0289643	0.0520074	0.806122	0.214286	1.42863
	TCA cycle	0.228628	0.0356265	0.109772	0.485714	0.742857	1.6026		Unfolded Protein												MKI67	0.530513	0.186252	0.31328	0.132653	0.255102	1.4178
	Monocyte	0.109004	0.0244783	0.240739	0.342857	0.857143	1.57422														MTHFD2	0.23199	0.0140496	0.674931	0.122449	0.367347	1.41077
	Classical Complement Pathway	0.0392789	0.0805575	0.534247	0.685714	0.228571	1.56837														ANXA3	0.192892	0.0200943	0.0270452	0.479592	0.673469	1.39309
	Glycolysis	0.0142405	0.0852186	0.0170257	0.514286	0.8	1.43077														BAD	0.0866323	0.0540771	0.168968	0.336735	0.744898	1.39131
	pDC	0.306799	0.286882	0.00399325	0.2	0.628571	1.42625														PSAT1	0.105016	0.0274543	0.0981576	0.44898	0.693878	1.37349
	Granulocyte	0.114511	0.048652	0.223332	0.971429	0.0571429	1.41507														GPT2	0.290331	0.0035437	0.0928127	0.785714	0.193878	1.36628
	Anti inflammation	0.211528	0.108341	0.162022	0.885714	0.0285714	1.39618														SPTLC2	0.0178132	0.0100081	0.622232	0.418367	0.295918	1.36434
	LDG	0.381344	0.039832	0.256891	0.4	0.257143	1.33521														H2AC6	0.20656	0.0541128	0.165039	0.744898	0.163265	1.33388
	MHC II	0.48606	0.164606	0.108235	0.371429	0.2	1.33033														PRPS2	0.0372219	0	0.0200848	0.295918	0.979592	1.33282
	TNF	0.149149	0.0374397	0.397623	0.171429	0.571429	1.32707														WEE1	0.0395061	0.0303294	0.356677	0.387755	0.510204	1.32447
	Tactivated	0.37024	0	0	0.428571	0.371429	1.17024														WSB2	0.20246	0.00586858	0.49086	0.27551	0.346939	1.32164
	Dendritic Cell	0.065664	0.034217	0.0555168	0.628571	0.314286	1.09825														FKBP5	0.0744991	0.0468238	0.117147	0.846939	0.234694	1.3201
	NLRP3 Inflammasome	0.0214708	0.059187	0.233571	0.257143	0.514286	1.08566														GBP5	0.117307	0	0.147938	0.816327	0.22449	1.30606
	Platelets	0.531529	0.102208	0.234914	0.0857143	0.114286	1.06865														C5	0.145951	0.0165188	0.0502857	0.602041	0.469388	1.28418
	Erythrocytes	0.00139686	0.0644798	0.0562077	0.6	0.342857	1.06494														SCO2	0.232908	0.0481866	0.000254326	0.438776	0.561224	1.28135
	Treg	0	0.00366144	0.0336401	0.771429	0	0.80873														GZMM	0.150536	0.0298677	0.0951491	0.765306	0.173469	1.21433
	NK Cell	0.00632477	0.00454003	0.0129826	0.285714	0.4	0.709562														SLC25A4	0.212914	0.0226406	0.0176853	0.326531	0.581633	1.1614
																					PGD	0.245698	0.0416737	0.373902	0.377551	0.112245	1.15107
																					RPE	0.184946	0.0089983	0.00489928	0.316327	0.632653	1.14782
																					GSTK1	0.155809	0.00461418	0.0239915	0.77551	0.183673	1.1436
																					NT5C3A	0.387322	0.0542213	0.17074	0.102041	0.418367	1.13269
																					CAST	0.026454	0.0312676	0.075485	0.561224	0.428571	1.123
																					NDUFS1	0.0599048	0.00393744	0.253872	0.0102041	0.785714	1.11363
																					HIF1A	0.292931	0.028394	0.185673	0.5	0.102041	1.10904
																					BUB1B	0.0329167	0	0.0314681	0.510204	0.530612	1.1052
																					GLUD1	0	0	0.0959381	0.795918	0.204082	1.09594
																					TOP2A	0.271819	0.0347393	0.0127507	0.265306	0.479592	1.06421
																					THEMIS2	0.030959	0.0594221	0.224853	0.397959	0.306122	1.01932
																					ADD3	0.110647	0.00314226	0	0.153061	0.734694	1.00154
																					AURKA	0.0563371	0.0644985	0.0208486	0.22449	0.602041	0.968215
																					MZB1	0.222497	0.00851477	0.359868	0.0816327	0.27551	0.948022
																					ARG1	0.0774574	0.0322057	0.0400828	0.112245	0.642857	0.904848
																					TKTL1	0.310098	0.00935823	0.0168171	0.408163	0.153061	0.897498
																					MCM2	0.0778396	0	0.42803	0.142857	0.244898	0.893625
																					LAP3	0.477941	0.023146	0.12103	0.193878	0.0612245	0.877219
																					TYMS	0.0639899	0.0130503	0.0113628	0.244898	0.540816	0.874117
																					HMMR	0.189166	0.0671879	0.192503	0.234694	0.0816327	0.765183
																					VSIG4	0.0447171	0.0217943	0.0877564	0.204082	0.336735	0.695084
																					NDUFA2	0.134685	0.0132405	0.0413062	0.0714286	0.326531	0.587191
																					MTPN	0.165567	0.00458601	0.0541092	0.0918367	0.265306	0.581405
																					SLFN5	0.0347135	0.00880722	0.127832	0.367347	0.0204082	0.559108
																					MCEMP1	0.155583	0.0760736	0.0729108	0.173469	0.0408163	0.518853
																					IL1RN	0.123049	0.0151127	0.0334488	0.214286	0.0714286	0.457325
																					AASS	0.0759161	0.00458936	0.0155229	0.346939	0	0.442967
																					LMNB1	0.0947041	0.0477923	0.00437451	0.183673	0.0510204	0.381565
																					MCM10	0.108698	0.0625245	0.00645017	0.163265	0.0102041	0.351142
																					NDUFB6	0.0343826	0.0317396	0.0438656	0.0306122	0.122449	0.263049
																						LR	RF	DTREE	ADB	SVM	Overall		Top 20 Genes
																					COX7B	1	1	1	1	0.234694	4.23469		CARD16
																					UQCRB	0.856385	0.654435	0	0.9	0.387755	2.79858		CCNB1
																					NDUFAF7	0.47215	0.31736	0.159763	0.8	0.377551	2.12682		CCNB2
																					NDUFA5	0.560498	0.578993	0	0	0.897959	2.03745		CD177
																					CCNB2	0.785195	0.0856349	0	0	0.969388	1.84022		CDC20
																					H2BC5	0.718193	0.0889185	0	0.3	0.673469	1.78058		CEP55
																					CEP55	0.865791	0.17244	0	0.1	0.5	1.63823		CFD
																					CARD16	0.540286	0.244645	0	0	0.755102	1.54003		COX7B
																					CDC20	0.456267	0.138243	0	0.2	0.714286	1.50879		COX7C
																					CCNB1	0.304972	0.22378	0	0	0.938776	1.46753		DNAJC15
																					LAP3	0.44607	0.0403371	0	0	0.908163	1.39457		DUSP4
																					CD177	0.387362	0.0250817	0	0	0.979592	1.39204		H2BC5
																					CFD	0.342852	0.0132675	0	0	1	1.35612		LAP3
																					TMEM126B	0.528589	0.576629	0	0	0.244898	1.35012		MSH6
																					NT5C3A	0.351569	0.0434959	0	0	0.928571	1.32364		NDUFA5
																					DUSP4	0.588316	0.0405965	0	0.3	0.357143	1.28605		NDUFAF7
																					COX7C	0.600987	0.489883	0	0.1	0.0306122	1.22148		NT5C3A
																					DNAJC15	0.365264	0.122713	0	0	0.693878	1.18185		TKTL1
																					TKTL1	0.264137	0.0101051	0	0.1	0.806122	1.18036		TMEM126B
																					MSH6	0.270902	0.00832542	0	0	0.857143	1.13637		UQCRB
																					CLEC4D	0.709263	0.0138748	0	0.4	0.0102041	1.13334
																					MZB1	0.155806	0.0789475	0	0	0.887755	1.12251
																					ASPM	0.16073	0.0202446	0	0	0.918367	1.09934
																					LMNB1	0.0918179	0.00885173	0	0	0.989796	1.09047
																					MTPN	0.219117	0.014029	0	0	0.846939	1.08008
																					H2BC21	0.395945	0.482812	0	0.1	0.0714286	1.05019
																					E2F3	0.309707	0.00995373	0	0	0.72449	1.04415
																					SOCS3	0.156942	0.0146557	0	0.1	0.765306	1.0369
																					MKI67	0.432751	0.155698	0	0	0.438776	1.02723
																					CAST	0.0477172	0.0484745	0	0.1	0.826531	1.02272
																					CASP3	0.331244	0.0996283	0	0	0.591837	1.02271
																					RPE	0.148792	0.00724232	0	0.2	0.663265	1.0193
																					SCO2	0.130078	0.0212718	0	0	0.836735	0.988084
																					AASS	0	0.0240356	0	0	0.959184	0.983219
																					GPT2	0.202156	0	0	0	0.77551	0.977667
																					VSIG4	0.0204809	0.00720371	0	0	0.94898	0.976664
																					GSTK1	0.163188	0.0243815	0	0	0.785714	0.973284
																					MCM10	0.041824	0.0412897	0	0	0.877551	0.960665
																					PTTG1	0.409753	0.0957456	0	0	0.44898	0.954479
																					SDC1	0.454666	0.0274548	0	0	0.469388	0.951508
																					PSAT1	0.0740203	0.00745968	0	0	0.867347	0.948827
																					CASP7	0.135087	0	0	0	0.795918	0.931005
																					GBP4	0.156328	0	0	0	0.744898	0.901226
																					CCNE1	0.392874	0.0172487	0	0	0.489796	0.899919
																					H2AC6	0.233523	0.0339106	0	0	0.612245	0.879679
																					THEMIS2	0.0378628	0.0253214	0	0	0.816327	0.879511
																					NDUFAF5	0.457587	0.26094	0	0	0.142857	0.861384
																					CAPZA1	0.186712	0.0325281	0	0	0.632653	0.851893
																					WSB2	0.1816	0.0062229	0	0	0.642857	0.83068
																					ANXA3	0.217954	0.0650676	0	0	0.530612	0.813634
																					ADD3	0.0766759	0.00541943	0	0	0.704082	0.786177
																					NDUFA2	0.073439	0.0227586	0	0	0.683673	0.779871
																					TPX2	0.510216	0.203392	0	0	0.0612245	0.774832
																					CFL1	0.569874	0.107499	0	0	0.0816327	0.759005
																					WEE1	0.00223351	0.0204834	0	0	0.734694	0.757411
																					FKBP5	0.0283978	0.00713218	0	0.1	0.602041	0.737571
																					OXCT1	0.13627	0.0176978	0	0	0.571429	0.725396
																					MCEMP1	0.259332	0.0644094	0	0	0.397959	0.721701
																					GBP5	0.125071	0.00988963	0	0	0.581633	0.716593
																					SLC25A4	0.156186	0.0143027	0	0	0.540816	0.711305
																					CR1	0.193327	0.00306426	0	0	0.510204	0.706595
																					BRCA1	0.0131652	0.00680986	0	0	0.653061	0.673036
																					SPTLC2	0.0220118	0.00337209	0	0	0.622449	0.647833
																					HMGB2	0.348471	0.0438459	0	0	0.255102	0.647419
																					MTHFD2	0.179029	0.00764869	0	0	0.459184	0.645862
																					TYMS	0.147889	0.0067856	0	0	0.479592	0.634266
																					HIF1A	0.342155	0.00369182	0	0	0.285714	0.631561
																					PGD	0.167875	0.0232986	0	0	0.418367	0.609541
																					GLUD1	0.00258846	0.0068685	0	0	0.561224	0.570681
																					SLFN5	0.00901178	0	0	0	0.55102	0.560032
																					C3	0.341643	0.00986504	0	0	0.204082	0.555589
																					ANXA1	0.253373	0.0774124	0	0	0.22449	0.555275
																					C3AR1	0.0212729	0.0110812	0	0	0.520408	0.552762
																					MCM2	0.0427681	0.0635299	0	0	0.428571	0.534869
																					CD58	0.165486	0.00190845	0	0	0.367347	0.534741
																					TTC19	0.186932	0.0109487	0	0	0.336735	0.534615
																					FAS	0.313161	0.0614426	0	0	0.132653	0.507257
																					PRPS2	0.0632298	0.031484	0	0	0.408163	0.502877
																					IL1RN	0.102986	0.0324472	0	0	0.326531	0.461964
																					COX20	0.187997	0.00684337	0	0	0.265306	0.460146
																					HMMR	0.0916685	0.0391767	0	0	0.316327	0.447172
																					BUB1B	0.0849567	0.00467596	0	0	0.346939	0.436571
																					TOP2A	0.112627	0.0105695	0	0	0.306122	0.429319
																					NDUFS1	0.0537018	0.0372978	0	0.2	0.122449	0.413449
																					C5	0.110023	0	0	0	0.295918	0.405942
																					GZMM	0.200682	0.0186753	0	0	0.183673	0.403031
																					APAF1	0.168686	0.0402838	0	0	0.193878	0.402848
																					ZWINT	0.110307	0.00112905	0	0	0.27551	0.386946
																					GINS2	0.285625	0.00376061	0	0	0.0918367	0.381222
																					COX18	0.121921	0.0305496	0	0	0.112245	0.264716
																					CFH	0.070956	0.0128768	0	0	0.173469	0.257302
																					NDUFB6	0.0280338	0.00297222	0	0	0.214286	0.245292
																					AURKA	0.0521343	0.0112723	0	0	0.153061	0.216468
																					OAT	0.0049991	0.0102579	0	0	0.163265	0.178522
																					BAD	0.0417524	0.024853	0	0	0.102041	0.168646
																					ARG1	0.0752438	0.011059	0	0	0.0510204	0.137323
																					PRDX3	0.0813139	0.00369633	0	0	0.0408163	0.125827
																					CYCS	0.023735	0.00368372	0	0	0.0204082	0.0478269
																					CENPM	0.0133421	0	0	0	0	0.0133421
																						LR	RF	ADB	SVM	NB	Overall		Top 20 Genes
																					UQCRB	0.871254	0.819885	1	0.602041	0.704082	3.99726		ANXA3
																					COX7B	1	1	0	0.959184	0.642857	3.60204		APAF1
																					NDUFAF7	0.460949	0.599734	1	0.744898	0.765306	3.57089		CCNB1
																					COX7C	0.613196	0.55186	0	0.908163	0.846939	2.92016		CCNE1
																					NDUFA5	0.583593	0.661743	0	0.877551	0.795918	2.91881		CEP55
																					H2BC21	0.440164	0.476751	0	0.857143	0.744898	2.51896		CLEC4D
																					NDUFAF5	0.508543	0.297881	0	0.867347	0.785714	2.45949		COX7B
																					CEP55	0.962607	0.235547	0	0.357143	0.632653	2.18795		COX7C
																					DNAJC15	0.386947	0.171718	0	0.653061	0.918367	2.13009		CR1
																					NT5C3A	0.353495	0.11498	0	0.846939	0.755102	2.07052		DNAJC15
																					HIF1A	0.344255	0.00546137	0	0.94898	0.663265	1.96196		DUSP4
																					FAS	0.307677	0.0536102	0	0.591837	1	1.95312		FAS
																					TMEM126B	0.507317	0.421693	0	0.418367	0.591837	1.93921		H2BC21
																					CLEC4D	0.613378	0.0441835	0	0.714286	0.520408	1.89226		HIF1A
																					CCNE1	0.562052	0.0554673	0	0.397959	0.857143	1.87262		NDUFA5
																					DUSP4	0.582279	0.0364715	0	0.622449	0.602041	1.84324		NDUFAF5
																					CR1	0.154247	0.0195062	0	0.795918	0.826531	1.7962		NDUFAF7
																					CCNB1	0.26966	0.125247	0	0.510204	0.867347	1.77246		NT5C3A
																					APAF1	0.242467	0.0378334	0	0.663265	0.806122	1.74969		TMEM126B
																					ANXA3	0.274743	0.0697777	0	0.928571	0.469388	1.74248		UQCRB
																					MKI67	0.511479	0.196253	0	0.755102	0.27551	1.73834
																					C3	0.476377	0.022164	0	0.806122	0.408163	1.71283
																					CDC20	0.562383	0.220954	0	0.438776	0.489796	1.71191
																					MCM10	0.0797798	0.0393105	0	0.979592	0.612245	1.71093
																					H2BC5	0.855337	0.0485855	0	0.0612245	0.714286	1.67943
																					IL1RN	0.0922291	0.043612	0	0.918367	0.622449	1.67666
																					H2AC6	0.251811	0.0849847	0	0.336735	0.979592	1.65312
																					GSTK1	0.0175269	0.0130241	0	0.734694	0.887755	1.653
																					COX20	0.157536	0.00796852	0	0.693878	0.77551	1.63489
																					CFL1	0.684456	0.122088	0	0.142857	0.683673	1.63307
																					MCEMP1	0.337859	0.12092	0	0.22449	0.94898	1.63225
																					CFD	0.273623	0	0	0.387755	0.908163	1.56954
																					MZB1	0.224073	0.039005	0	0.77551	0.530612	1.5692
																					SPTLC2	0	0.00787214	0	1	0.540816	1.54869
																					OXCT1	0.13321	0.0305478	0	0.642857	0.72449	1.53111
																					CARD16	0.534963	0.222247	0	0.295918	0.459184	1.51231
																					CD58	0.218561	0	0	0.989796	0.295918	1.50428
																					CAPZA1	0.169908	0.00333334	0	0.326531	0.989796	1.48957
																					MTHFD2	0.128306	0.00639745	0	0.887755	0.428571	1.45103
																					NDUFB6	0.0365663	0.0828109	0	0.826531	0.479592	1.4255
																					TOP2A	0.0428623	0.0165199	0	0.428571	0.877551	1.3655
																					ZWINT	0.105271	0.00367661	0	0.27551	0.959184	1.34364
																					CCNB2	0.770221	0.0839418	0	0.377551	0.102041	1.33375
																					MTPN	0.155158	0.00430433	0	0.816327	0.357143	1.33293
																					TPX2	0.502224	0.161594	0	0.459184	0.204082	1.32708
																					MCM2	0.032677	0.0169711	0	0.969388	0.306122	1.32516
																					ASPM	0.162514	0.0503032	0	0.55102	0.55102	1.31486
																					BUB1B	0.174066	0	0	0.193878	0.928571	1.29651
																					GBP5	0.164017	0.0569161	0	0.673469	0.387755	1.28216
																					PTTG1	0.458421	0.130957	0	0.0918367	0.561224	1.24244
																					PSAT1	0.177801	0.0129931	0	0.0816327	0.938776	1.2112
																					THEMIS2	0.0185636	0.0377294	0	0.316327	0.836735	1.20935
																					PGD	0.20281	0.0262853	0	0.0102041	0.969388	1.20869
																					HMMR	0.138504	0.00118416	0	0.938776	0.122449	1.20091
																					GINS2	0.28084	0	0	0.683673	0.22449	1.189
																					CENPM	0.0451042	0	0	0.489796	0.653061	1.18796
																					AURKA	0.078652	0.0681717	0	0.836735	0.193878	1.17744
																					CFH	0.100867	0.0113235	0	0.234694	0.816327	1.16321
																					ANXA1	0.229869	0.214743	0	0.0306122	0.673469	1.14869
																					MSH6	0.31083	0.00221407	0	0.765306	0.0612245	1.13957
																					GZMM	0.219116	0.00209754	0	0.44898	0.438776	1.10897
																					PRPS2	0.107959	0	0	0.0714286	0.897959	1.07735
																					CASP7	0.128824	0.0020686	0	0.520408	0.418367	1.06967
																					NDUFA2	0.133594	0.0164937	0	0.785714	0.132653	1.06845
																					NDUFS1	0.100222	0.0110703	0	0.897959	0.0510204	1.06027
																					GPT2	0.186035	0.00756052	0	0.540816	0.316327	1.05074
																					SOCS3	0.134417	0.0246351	0	0.72449	0.153061	1.0366
																					CAST	0.0830192	0.05512	0	0.5	0.397959	1.0361
																					TTC19	0.205696	0.0547531	0	0.561224	0.214286	1.03596
																					LAP3	0.529893	0.0958677	0	0.163265	0.234694	1.02372
																					WSB2	0.186916	0.00337061	0	0.479592	0.346939	1.01682
																					CASP3	0.333997	0.120634	0	0.285714	0.244898	0.985244
																					CD177	0.431982	0.0638511	0	0.408163	0.0714286	0.975425
																					TYMS	0.113232	0.00410436	0	0.581633	0.265306	0.964276
																					CYCS	0.0295762	0.00812815	0	0.469388	0.44898	0.956072
																					COX18	0.125089	0.0127836	0	0.704082	0.112245	0.954199
																					TKTL1	0.171952	0.0194756	0	0.367347	0.377551	0.936325
																					SLFN5	0.0490679	0.00827588	0	0.183673	0.693878	0.934895
																					GLUD1	0.0293452	0.0043588	0	0.571429	0.326531	0.931663
																					AASS	0.114828	0.00833531	0	0.632653	0.173469	0.929285
																					HMGB2	0.336923	0.0510525	0	0.255102	0.285714	0.928791
																					LMNB1	0.122946	0.0813038	0	0.214286	0.5	0.918535
																					RPE	0.189847	0.00404041	0	0.102041	0.571429	0.867357
																					ADD3	0.0660067	0	0	0.0204082	0.734694	0.821109
																					C3AR1	0.104458	0.0414482	0	0.530612	0.142857	0.819375
																					GBP4	0.12021	0.0112123	0	0.244898	0.367347	0.743667
																					SCO2	0.0003363	0.00703651	0	0.122449	0.581633	0.711454
																					VSIG4	0.0440141	0.0144157	0	0.612245	0.0306122	0.701287
																					WEE1	0.0172409	0	0	0.306122	0.336735	0.660098
																					BRCA1	0.0702195	0.0124638	0	0.265306	0.255102	0.603091
																					E2F3	0.388655	0.00723076	0	0.204082	0	0.599967
																					PRDX3	0.0313471	0.0122174	0	0.0408163	0.510204	0.594585
																					SLC25A4	0.184177	0.0162624	0	0.173469	0.183673	0.557582
																					C5	0.150747	0	0	0.346939	0.0102041	0.507889
																					SDC1	0.317008	0.0310274	0	0.132653	0.0204082	0.501097
																					ARG1	0.156518	0.0539531	0	0.112245	0.163265	0.485981
																					FKBP5	0.023457	0.0166193	0	0.153061	0.0918367	0.284974
																					BAD	0.0184761	0.00424363	0	0.0510204	0.0816327	0.155373
																					OAT	0.0223385	0.0340398	0	0	0.0408163	0.0971946
																						LR	RF	ADB	LDA	SVM	Overall		Top 20 Genes
																					COX7B	1	1	1	0.361483	0.918367	4.27985		BRCA1
																					UQCRB	0.834326	0.528033	0.909091	0.180068	0.244898	2.69642		CARD16
																					NDUFAF7	0.457917	0.329714	1	0.0127924	0.510204	2.31063		CASP7
																					COX7C	0.58717	0.504494	0.0909091	0.203912	0.908163	2.29465		CCNB1
																					H2BC5	0.779275	0.0221156	0.272727	0.151024	0.989796	2.21494		CCNE1
																					CLEC4D	0.702859	0.0446463	0.454545	0.0377428	0.969388	2.20918		CEP55
																					CEP55	0.801751	0.134707	0	0.401332	0.734694	2.07248		CFL1
																					TMEM126B	0.488918	0.344345	0	0.173161	0.928571	1.93499		CLEC4D
																					NT5C3A	0.359146	0.104123	0	0.381555	1	1.84482		COX7B
																					CASP7	0.0996354	0	0	1	0.612245	1.71188		COX7C
																					CFL1	0.549544	0.0615646	0	0.103744	0.979592	1.69444		DNAJC15
																					CARD16	0.587442	0.302556	0	0.0624202	0.72449	1.67691		DUSP4
																					BRCA1	0.0170294	0.00321796	0	0.845564	0.693878	1.55969		E2F3
																					DUSP4	0.651307	0.029239	0	0.00012489	0.867347	1.54802		H2BC21
																					H2BC21	0.388308	0.429254	0	0.187201	0.5	1.50476		H2BC5
																					DNAJC15	0.323301	0.118493	0	0.174355	0.877551	1.4937		NDUFAF5
																					CCNE1	0.6228	0.0569121	0	0.230466	0.571429	1.48161		NDUFAF7
																					NDUFAF5	0.448554	0.259632	0	0.758619	0.0102041	1.47701		NT5C3A
																					CCNB1	0.323233	0.100823	0	0.427807	0.591837	1.4437		TMEM126B
																					E2F3	0.301024	0.0324049	0	0.245362	0.857143	1.43593		UQCRB
																					CCNB2	0.750583	0.0346928	0	0.0105158	0.581633	1.37742
																					FAS	0.36316	0.0388028	0	0.0926693	0.846939	1.34157
																					CFD	0.401989	0.00341978	0	0.151799	0.765306	1.32251
																					OAT	0.00029147	0.0126937	0	0.813558	0.418367	1.24491
																					CYCS	0.0333522	0.00990677	0	0.313037	0.887755	1.24405
																					CFH	0.128393	0.0216037	0.0909091	0.245031	0.755102	1.24104
																					GINS2	0.28483	0.0208885	0	0.137875	0.795918	1.23951
																					SDC1	0.398829	0.130945	0	0.246083	0.459184	1.23504
																					GBP4	0.218997	0.0102205	0	0.176995	0.816327	1.22254
																					COX18	0.116076	0.0632014	0	0.0717903	0.94898	1.20005
																					CDC20	0.483426	0.0714541	0	0.0967461	0.540816	1.19244
																					WSB2	0.122131	0.00267962	0	0.224971	0.836735	1.18652
																					GZMM	0.184178	0.0102158	0	0.232201	0.744898	1.17149
																					NDUFA5	0.520115	0.454255	0	0.175211	0.0204082	1.16999
																					COX20	0.187442	0.00670425	0	0.0248264	0.938776	1.15775
																					CR1	0.145096	0.00857477	0	0.0972187	0.897959	1.14885
																					CD58	0.230231	0.0751011	0	0.281515	0.55102	1.13787
																					TPX2	0.547108	0.194591	0	0.115016	0.27551	1.13223
																					GPT2	0.23	0.0115661	0	0.110392	0.77551	1.12747
																					AASS	0.00525809	0.0185209	0	0.141275	0.959184	1.12424
																					C5	0.200344	0.0366945	0	0.178393	0.653061	1.06849
																					CASP3	0.260265	0.00373261	0	0.162366	0.622449	1.04881
																					C3	0.346982	0.0118197	0	0.0124491	0.673469	1.04472
																					CD177	0.360583	0.0306201	0	0.0893141	0.561224	1.04174
																					GLUD1	0.0420679	0.0411868	0	0.136277	0.785714	1.00525
																					CAPZA1	0.217667	0.0260181	0	0.128364	0.632653	1.0047
																					LAP3	0.451689	0.0591353	0	0.297557	0.163265	0.971646
																					CAST	0.0374006	0.0338237	0	0.296951	0.602041	0.970216
																					PRDX3	0.0354907	0.00104772	0	0.625602	0.295918	0.958059
																					OXCT1	0.136192	0.0123614	0	0.397997	0.408163	0.954714
																					GBP5	0.0366177	0.0282324	0	0.0808114	0.806122	0.951784
																					SOCS3	0.174189	0.0126901	0.0909091	0.181423	0.489796	0.949007
																					FKBP5	0.0122039	0.0315726	0	0.0722534	0.826531	0.94256
																					PTTG1	0.437254	0.0649462	0	0.00778628	0.428571	0.938558
																					BAD	0.113831	0.0269329	0	0.0887598	0.704082	0.933605
																					ANXA1	0.232276	0.0683467	0	0.256562	0.346939	0.904124
																					LMNB1	0.133015	0.0714913	0	0.537752	0.142857	0.885116
																					H2AC6	0.204468	0.0491548	0	0.103246	0.520408	0.877276
																					C3AR1	0.121344	0.00683816	0	0.0543125	0.663265	0.845759
																					PRPS2	0.0993511	0	0	0.354162	0.377551	0.831064
																					CENPM	0.126516	0.00343653	0	0.0571782	0.642857	0.829987
																					TKTL1	0.315245	0.00847507	0.272727	0.00890319	0.214286	0.819636
																					AURKA	0.00357607	0.00734433	0	0.0890288	0.714286	0.814235
																					TOP2A	0.16667	0.0130787	0	0.116385	0.479592	0.775725
																					HMGB2	0.358691	0.0661734	0	0.152806	0.193878	0.771548
																					SPTLC2	0.0359714	0.00447107	0	0.281331	0.44898	0.770753
																					BUB1B	0	0.030719	0	0.0414294	0.683673	0.755822
																					RPE	0.120815	0.00670425	0.0909091	0.174296	0.357143	0.749867
																					NDUFS1	0.0815856	0.00324949	0.272727	0.127362	0.255102	0.740026
																					PGD	0.155982	0	0	0.178643	0.397959	0.732584
																					GSTK1	0.118207	0.0334076	0	0.0374768	0.530612	0.719703
																					MTHFD2	0.146111	0.00589852	0	0.485789	0.0714286	0.709228
																					THEMIS2	0.0245464	0.0130444	0	0.219398	0.438776	0.695764
																					MKI67	0.397623	0.132978	0	0.0732159	0.0918367	0.695653
																					ZWINT	0.145511	0.00667274	0	0.14976	0.387755	0.689699
																					TTC19	0.179617	0.0384555	0	0.126491	0.336735	0.681298
																					SLFN5	0.0307776	0.00778395	0	0.163314	0.469388	0.671264
																					MZB1	0.0916848	0.0536857	0	0.439904	0.0408163	0.626091
																					MCEMP1	0.276059	0.0858325	0	0.124956	0.132653	0.619501
																					HIF1A	0.270617	0.00190724	0	0.100066	0.234694	0.607284
																					PSAT1	0.0662941	0.0103294	0	0.121287	0.367347	0.565258
																					MSH6	0.258878	0	0	0.206036	0.0816327	0.546547
																					SCO2	0.0559466	0.0445813	0	0.103647	0.326531	0.530706
																					WEE1	0.0789302	0.0223509	0	0.161952	0.265306	0.52854
																					SLC25A4	0.110076	0.0180048	0	0.0603335	0.316327	0.50474
																					IL1RN	0.187127	0.0523174	0	0.0899969	0.173469	0.502911
																					VSIG4	0.0738118	0.00880094	0	0.0570697	0.306122	0.445805
																					ANXA3	0.292805	0.0316203	0	0.0481309	0.0510204	0.423576
																					APAF1	0.185001	0.0185321	0	0.0923572	0.112245	0.408135
																					HMMR	0.0667418	0.0115234	0	0.117544	0.183673	0.379482
																					NDUFB6	0.0434497	0.0063987	0	0.026083	0.285714	0.361646
																					TYMS	0.0443205	0.00295897	0	0.100198	0.204082	0.351559
																					ADD3	0.0529192	0	0	0.0713471	0.22449	0.348756
																					NDUFA2	0.0705506	0.0162712	0	0.223813	0.0306122	0.341247
																					MTPN	0.227566	0.0131863	0	0	0.0612245	0.301977
																					MCM2	0.139872	0	0	0.0495457	0.102041	0.291459
																					ARG1	0.0167355	0.0620286	0	0.0312739	0.153061	0.263099
																					MCM10	0.0200943	0.0336774	0	0.0148713	0.122449	0.191092
																					ASPM	0.108108	0.00267962	0	0.0205645	0	0.131352
																						LR	RF	ADB	SVM	NB	Overall		Top 20 Genes
																					COX7B	0.963937	1	0	0.938776	0.836735	3.73945		CARD16
																					UQCRB	0.946032	0.759247	1	0.265306	0.479592	3.45018		CCNB2
																					COX7C	0.620075	0.554709	0	0.918367	0.826531	2.91968		CD58
																					CEP55	1	0.22295	0	0.540816	0.918367	2.68213		CDC20
																					DUSP4	0.852708	0.0734862	0	0.877551	0.785714	2.58946		CEP55
																					CLEC4D	0.768796	0.0447567	0	0.744898	0.867347	2.4258		CFD
																					FAS	0.508031	0.274973	0	0.857143	0.765306	2.40545		CLEC4D
																					TPX2	0.685748	0.251567	0	0.387755	0.979592	2.30466		COX18
																					TMEM126B	0.626139	0.805656	0.04	0.367347	0.377551	2.21669		COX20
																					CCNB2	0.817405	0.0626734	0	0.602041	0.72449	2.20661		COX7B
																					DNAJC15	0.356719	0.155941	0	0.887755	0.795918	2.19633		COX7C
																					CFD	0.555276	0.00441863	0	0.632653	0.897959	2.09031		DNAJC15
																					CD58	0.295399	0.243907	0	0.571429	0.969388	2.08012		DUSP4
																					NDUFAF7	0.402807	0.338179	0.96	0.0102041	0.357143	2.06833		E2F3
																					COX18	0.186797	0.0414183	0	0.979592	0.857143	2.06495		FAS
																					CARD16	0.581294	0.216818	0	0.704082	0.530612	2.03281		NDUFA5
																					E2F3	0.355052	0.0169182	0	0.867347	0.77551	2.01483		NDUFAF7
																					NDUFA5	0.594956	0.884475	0	0.0408163	0.44898	1.96923		TMEM126B
																					CDC20	0.377063	0.0758079	0	0.561224	0.938776	1.95287		TPX2
																					COX20	0.0943616	0.025587	0	0.969388	0.846939	1.93628		UQCRB
																					WEE1	0.155434	0.0249141	0	0.836735	0.908163	1.92525
																					BAD	0.288123	0.0477576	0	0.94898	0.612245	1.89711
																					CR1	0.107543	0.026013	0	0.908163	0.816327	1.85805
																					CCNB1	0.346791	0.191747	0	0.714286	0.581633	1.83446
																					GINS2	0.465922	0.0617949	0	0.806122	0.5	1.83384
																					ADD3	0.172689	0	0	0.959184	0.693878	1.82575
																					CYCS	0.105613	0.00440604	0	0.897959	0.806122	1.8141
																					CASP3	0.36216	0.249913	0	0.673469	0.520408	1.80595
																					CD177	0.438644	0.0227032	0	0.581633	0.744898	1.78788
																					CASP7	0.130308	0	0	0.642857	0.989796	1.76296
																					CCNE1	0.40663	0.0182061	0	0.591837	0.734694	1.75137
																					CFH	0.0833009	0.0187377	0	0.72449	0.887755	1.71428
																					FKBP5	0.0862213	0.0160858	0	0.846939	0.755102	1.70435
																					H2BC21	0.370983	0.403395	0	0.734694	0.163265	1.67234
																					H2BC5	0.650226	0.0933868	0	0.765306	0.153061	1.66198
																					C3	0.401912	0.0067894	0	0.653061	0.571429	1.63319
																					VSIG4	0.0871427	0.00682285	0	0.928571	0.591837	1.61437
																					CFL1	0.540826	0.173506	0	0	0.877551	1.59188
																					HMGB2	0.424816	0.0165488	0	0.989796	0.132653	1.56381
																					GBP4	0.231447	0.032668	0	0.826531	0.469388	1.56003
																					CAPZA1	0.307771	0.00897671	0	0.693878	0.540816	1.55144
																					CENPM	0.0184662	0.0245857	0	0.55102	0.928571	1.52264
																					PSAT1	0.0541496	0.0172664	0	0.438776	1	1.51019
																					ANXA1	0.253296	0.0769461	0	0.479592	0.683673	1.49351
																					WSB2	0.154306	0.0343488	0	0.27551	0.959184	1.42335
																					GBP5	0.137656	0.00913665	0	0.816327	0.459184	1.4223
																					C5	0.182308	0	0	0.683673	0.55102	1.417
																					APAF1	0.221177	0.00871982	0	0.520408	0.663265	1.41357
																					BRCA1	0.0627406	0.00441572	0	0.622449	0.714286	1.40389
																					GPT2	0.39518	0.0115967	0	0.785714	0.204082	1.39657
																					PTTG1	0.551205	0.132264	0	0.428571	0.255102	1.36714
																					TOP2A	0.324707	0	0	0.336735	0.704082	1.36552
																					TKTL1	0.407813	0.00835267	0	0.295918	0.653061	1.36514
																					SLFN5	0.0966554	0	0	1	0.265306	1.36196
																					GSTK1	0.372916	0.015601	0	0.77551	0.193878	1.3579
																					SDC1	0.601408	0.0335599	0	0.397959	0.27551	1.30844
																					THEMIS2	0.0159726	0.0240317	0	0.316327	0.94898	1.30531
																					ANXA3	0.267768	0.00864279	0	0.346939	0.673469	1.29682
																					C3AR1	0.039613	0.0130452	0	0.663265	0.561224	1.27715
																					GLUD1	0.0209598	0	0	0.795918	0.438776	1.25565
																					CAST	0	0.066441	0	0.612245	0.489796	1.16848
																					NT5C3A	0.374521	0.0989653	0	0.255102	0.408163	1.13675
																					SCO2	0.379802	0.0578294	0	0.408163	0.285714	1.13151
																					OXCT1	0.209453	0.0350719	0	0.489796	0.387755	1.12208
																					TYMS	0.373821	0.0190544	0	0.204082	0.510204	1.10716
																					H2AC6	0.119935	0.047782	0	0.755102	0.173469	1.09629
																					PGD	0.233349	0.0141177	0	0.469388	0.367347	1.0842
																					NDUFS1	0.0557372	0.0283195	0	0.510204	0.418367	1.01263
																					BUB1B	0.160278	0.0565233	0	0.112245	0.602041	0.931087
																					MKI67	0.484948	0.14448	0	0.234694	0.0510204	0.915142
																					SOCS3	0.196575	0.0428765	0	0.357143	0.306122	0.902717
																					NDUFAF5	0.502775	0.1401	0	0.0306122	0.22449	0.897976
																					RPE	0.151748	0.00866242	0	0.418367	0.295918	0.874696
																					ARG1	0.0551025	0.0039429	0	0.153061	0.642857	0.854964
																					OAT	0.0268709	0.0375636	0	0.377551	0.397959	0.839945
																					TTC19	0.228848	0	0	0.244898	0.336735	0.81048
																					LAP3	0.471951	0.0380539	0	0.183673	0.112245	0.805923
																					PRPS2	0.00570283	0.0197236	0	0.44898	0.326531	0.800937
																					HIF1A	0.147096	0.0086054	0	0.5	0.142857	0.798559
																					GZMM	0.0780139	0.00215458	0	0.530612	0.183673	0.794454
																					PRDX3	0.069642	0.0082718	0	0.459184	0.244898	0.781995
																					SLC25A4	0.15393	0.0181067	0	0.285714	0.316327	0.774077
																					AURKA	0.0830064	0.0022056	0	0.0510204	0.622449	0.758681
																					ASPM	0.0564226	0.0365639	0	0.0204082	0.632653	0.746048
																					ZWINT	0.00685412	0	0	0.306122	0.346939	0.659915
																					SPTLC2	0.0531768	0	0	0.326531	0.234694	0.614401
																					NDUFB6	0.0325664	0	0	0.102041	0.428571	0.563179
																					IL1RN	0.0969629	0.0239963	0	0.193878	0.214286	0.529122
																					HMMR	0.17705	0.0106012	0	0.214286	0.122449	0.524386
																					MSH6	0.354997	0.00227428	0	0.122449	0.0408163	0.520536
																					LMNB1	0.115908	0.104448	0	0.173469	0.0918367	0.485662
																					MCM10	0.167047	0.0481774	0	0.142857	0.0714286	0.429511
																					MCEMP1	0.0527745	0.10332	0	0.163265	0.0816327	0.400993
																					MTHFD2	0.263682	0.00459639	0	0.0918367	0.0306122	0.390728
																					MCM2	0.132547	0	0	0.132653	0.0612245	0.326425
																					NDUFA2	0.13853	0.0125224	0	0.0612245	0.102041	0.314318
																					MZB1	0.191627	0	0	0.0714286	0.0102041	0.273259
																					AASS	0.00507986	0.0270014	0	0.22449	0	0.256571
																					MTPN	0.149269	0.00302497	0	0.0816327	0.0204082	0.254335
																						LR	RF	ADB	SVM	NB	Overall		Top 20 Genes
																					COX7B	0.979721	1	0.25	0.877551	0.846939	3.95421		CASP3
																					UQCRB	0.984709	0.870144	1	0.336735	0.704082	3.89567		CCNB2
																					CEP55	1	0.282094	0.1875	0.979592	0.928571	3.37776		CCNE1
																					COX7C	0.649844	0.585017	0.0625	0.867347	0.836735	3.00144		CD58
																					NDUFA5	0.647541	0.946206	0	1	0.244898	2.83865		CDC20
																					TMEM126B	0.607251	0.778403	0	0.928571	0.306122	2.62035		CEP55
																					CLEC4D	0.710563	0.0444025	0.0625	0.918367	0.877551	2.61338		CFD
																					CFL1	0.569267	0.188812	0	0.938776	0.887755	2.58461		CFL1
																					NDUFAF7	0.419811	0.361068	0.9375	0.44898	0.326531	2.49389		CLEC4D
																					DUSP4	0.702972	0.0389478	0.0625	0.816327	0.795918	2.41666		COX7B
																					CFD	0.491351	0	0	0.969388	0.918367	2.37911		COX7C
																					TPX2	0.654846	0.289502	0	0.836735	0.561224	2.34231		DNAJC15
																					CDC20	0.489125	0.138319	0	0.734694	0.94898	2.31112		DUSP4
																					CCNB2	0.841886	0.15277	0	0.510204	0.72449	2.22935		FAS
																					DNAJC15	0.391079	0.2028	0	0.826531	0.806122	2.22653		NDUFA5
																					CASP3	0.396132	0.221099	0.0625	0.55102	0.989796	2.22055		NDUFAF5
																					NDUFAF5	0.521931	0.222911	0.0625	0.357143	1	2.16449		NDUFAF7
																					FAS	0.430844	0.155568	0	0.785714	0.77551	2.14764		TMEM126B
																					CCNE1	0.344066	0.00957529	0	0.989796	0.734694	2.07813		TPX2
																					CD58	0.240729	0.1094	0	0.714286	0.969388	2.0338		UQCRB
																					COX18	0.180516	0.00389983	0	0.908163	0.867347	1.95993
																					E2F3	0.35414	0.0086377	0	0.795918	0.785714	1.94441
																					CARD16	0.555723	0.230775	0.0625	0.561224	0.530612	1.94084
																					CFH	0.037617	0.0209896	0	0.94898	0.897959	1.90555
																					COX20	0.140642	0	0	0.887755	0.857143	1.88554
																					CR1	0.14971	0.0191888	0	0.857143	0.826531	1.85257
																					CYCS	0.0876611	0.00763532	0	0.846939	0.816327	1.75856
																					CD177	0.336118	0.0291789	0	0.581633	0.744898	1.69183
																					CCNB1	0.351951	0.206804	0	0.520408	0.602041	1.6812
																					GINS2	0.385644	0.0400452	0	0.744898	0.5	1.67059
																					FKBP5	0.0744961	0.0449887	0	0.77551	0.765306	1.6603
																					SDC1	0.501556	0.0277987	0	0.806122	0.316327	1.6518
																					TOP2A	0.310536	0.0162877	0	0.469388	0.755102	1.55131
																					C3	0.31484	0.0220382	0	0.612245	0.581633	1.53076
																					BAD	0.171313	0.0499927	0	0.653061	0.622449	1.49682
																					ASPM	0.105183	0.00331805	0	0.693878	0.642857	1.44524
																					CENPM	0.0108467	0.00331805	0	0.489796	0.938776	1.44274
																					BRCA1	0.0571198	0.01702	0	0.642857	0.714286	1.43128
																					ANXA1	0.27391	0.113118	0	0.346939	0.683673	1.41764
																					ARG1	0.0137627	0.0415282	0	0.704082	0.653061	1.41243
																					RPE	0.154529	0.0121508	0	0.959184	0.27551	1.40137
																					CAPZA1	0.287516	0	0	0.571429	0.540816	1.39976
																					ZWINT	0.112603	0.0211228	0	0.306122	0.959184	1.39903
																					THEMIS2	0.0103531	0.0524582	0	0.897959	0.428571	1.38934
																					AURKA	0.0742724	0.00829907	0	0.673469	0.632653	1.38869
																					GBP4	0.140608	0	0	0.765306	0.459184	1.3651
																					BUB1B	0.0609953	0.0468035	0	0.632653	0.612245	1.3527
																					SOCS3	0.124298	0.0410696	0	0.663265	0.520408	1.34904
																					H2BC21	0.408542	0.504826	0.0625	0.183673	0.183673	1.34322
																					TKTL1	0.361996	0.01222	0	0.622449	0.336735	1.3334
																					ANXA3	0.256468	0.0735458	0.0625	0.22449	0.673469	1.29047
																					C5	0.127576	0.00121662	0	0.591837	0.55102	1.27165
																					TYMS	0.145587	0.012373	0	0.204082	0.908163	1.2702
																					GBP5	0.0654872	0	0	0.755102	0.44898	1.26957
																					SLFN5	0.0642894	0.00916518	0	0.214286	0.979592	1.26733
																					GPT2	0.31533	0.0245518	0	0.479592	0.438776	1.25825
																					NT5C3A	0.332691	0.0523305	0.0625	0.428571	0.357143	1.23324
																					PTTG1	0.454282	0.10132	0	0.367347	0.285714	1.20866
																					H2BC5	0.664933	0.126071	0.0625	0.173469	0.173469	1.20044
																					CASP7	0.163127	0.00233185	0	0.540816	0.489796	1.19607
																					C3AR1	0.00691826	0.00476969	0	0.602041	0.571429	1.18516
																					OXCT1	0.207533	0.0732912	0	0.418367	0.408163	1.10735
																					TTC19	0.216025	0.0892987	0	0.244898	0.510204	1.06043
																					CAST	0.0298867	0.0300873	0	0.530612	0.469388	1.05997
																					WEE1	0.07039	0	0	0.387755	0.591837	1.04998
																					ADD3	0.16747	0.0181702	0	0.153061	0.693878	1.03258
																					SCO2	0.276615	0.0347516	0	0.408163	0.265306	0.984836
																					GLUD1	0.0241564	0	0	0.72449	0.22449	0.973136
																					LAP3	0.516478	0.0771614	0	0.234694	0.132653	0.960987
																					GSTK1	0.193968	0.0281593	0	0.5	0.214286	0.936413
																					PGD	0.198725	0.032852	0	0.316327	0.377551	0.925454
																					APAF1	0.204287	0.00476685	0	0	0.663265	0.872319
																					PRDX3	0.156845	0	0	0.326531	0.387755	0.871131
																					GZMM	0.154593	0.0403846	0	0.459184	0.204082	0.858243
																					WSB2	0.231207	0.0037328	0	0.27551	0.346939	0.857389
																					PRPS2	0.0122621	0.0270324	0	0.397959	0.418367	0.855621
																					SPTLC2	0.0391067	0.00439675	0	0.683673	0.112245	0.839422
																					NDUFS1	0.0422179	0.0170141	0.0625	0.438776	0.255102	0.81561
																					HMGB2	0.435223	0.0655593	0	0.142857	0.153061	0.7967
																					PSAT1	0.0584179	0.0191759	0	0.377551	0.295918	0.751063
																					HIF1A	0.415897	0.00354248	0	0.163265	0.163265	0.74597
																					SLC25A4	0.195255	0.0171986	0	0.0510204	0.479592	0.743066
																					MKI67	0.527341	0.0894484	0	0.0612245	0.0612245	0.739239
																					OAT	0.0424113	0	0	0.295918	0.397959	0.736289
																					NDUFB6	0	0.00391359	0	0.285714	0.367347	0.656975
																					HMMR	0.219079	0.123072	0	0.132653	0.142857	0.617661
																					IL1RN	0.0799304	0.0912882	0.0625	0.122449	0.234694	0.590861
																					H2AC6	0.15331	0.0258424	0	0.193878	0.193878	0.566908
																					NDUFA2	0.118902	0.0307281	0	0.255102	0.122449	0.527181
																					MCEMP1	0.126651	0.186565	0	0.0918367	0.0918367	0.496889
																					MSH6	0.340375	0.00326931	0	0.0408163	0.0510204	0.435482
																					VSIG4	0.0969736	0.00419313	0	0.265306	0.0306122	0.397085
																					LMNB1	0.0998308	0.0470889	0	0.112245	0.102041	0.361205
																					MZB1	0.200133	0.0459304	0	0.102041	0.0102041	0.358308
																					MCM10	0.157137	0.0220439	0	0.0816327	0.0816327	0.342446
																					MTHFD2	0.267114	0.00887385	0	0.0204082	0.0408163	0.337212
																					MTPN	0.161996	0.0136277	0	0.0102041	0.0204082	0.206236
																					MCM2	0.0629087	0	0	0.0714286	0.0714286	0.205766
																					AASS	0.0668469	0	0	0.0306122	0	0.0974592
																						LR	RF	DTREE	ADB	SVM	Overall		Top 20 Genes
																					COX7B	1	1	1	0.04	0.928571	3.96857		CARD16
																					UQCRB	0.899647	0.793181	0	0.96	0.265306	2.91813		CCNB2
																					COX7C	0.643318	0.562291	0	0	0.918367	2.12398		CEP55
																					NDUFAF7	0.448437	0.34572	0.168855	1	0.0306122	1.99362		CFD
																					CLEC4D	0.759377	0.0632563	0	0	0.969388	1.79202		CFL1
																					CEP55	0.844257	0.156252	0	0	0.734694	1.7352		CLEC4D
																					CFL1	0.583253	0.168037	0	0	0.979592	1.73088		COX7B
																					CARD16	0.655248	0.252304	0	0	0.72449	1.63204		COX7C
																					CCNB2	0.780904	0.134517	0	0	0.581633	1.49705		DNAJC15
																					DUSP4	0.660563	0.0392479	0	0	0.744898	1.44471		DUSP4
																					TMEM126B	0.549593	0.552181	0	0	0.336735	1.43851		E2F3
																					H2BC21	0.398887	0.501275	0	0	0.520408	1.42057		FAS
																					DNAJC15	0.341117	0.190363	0	0	0.887755	1.41924		GINS2
																					FAS	0.425045	0.119324	0	0	0.857143	1.40151		H2BC21
																					H2BC5	0.771735	0.0672287	0	0	0.5	1.33896		H2BC5
																					E2F3	0.332507	0.106476	0	0	0.877551	1.31653		HIF1A
																					GINS2	0.378912	0.0756306	0	0	0.806122	1.26067		NDUFA5
																					CFD	0.467077	0.0263766	0	0	0.755102	1.24856		NDUFAF7
																					NDUFA5	0.563914	0.61148	0	0	0.0612245	1.23662		TMEM126B
																					HIF1A	0.192238	0	0	0	0.989796	1.18203		UQCRB
																					CCNE1	0.546134	0.0585316	0	0	0.571429	1.17609
																					CDC20	0.465833	0.149906	0	0	0.540816	1.15656
																					TPX2	0.566002	0.264504	0	0	0.316327	1.14683
																					C3	0.449888	0.0182067	0	0	0.673469	1.14156
																					CCNB1	0.339733	0.198377	0	0	0.591837	1.12995
																					COX18	0.158056	0.00514346	0	0	0.94898	1.11218
																					COX20	0.145947	0.0259512	0	0	0.938776	1.11067
																					H2AC6	0.18517	0.0577068	0	0	0.867347	1.11022
																					CASP3	0.294159	0.170138	0	0	0.622449	1.08675
																					NT5C3A	0.405574	0.168314	0	0	0.510204	1.08409
																					CR1	0.155629	0.0156515	0	0	0.908163	1.07944
																					GBP4	0.229574	0.010775	0	0	0.826531	1.06688
																					SDC1	0.534246	0.109928	0	0	0.418367	1.06254
																					AASS	0.0677694	0.0282485	0	0	0.959184	1.0552
																					SPTLC2	0.0182025	0.00641723	0	0	1	1.02462
																					PTTG1	0.504109	0.0687053	0	0	0.44898	1.02179
																					CD177	0.420116	0.0186673	0	0	0.561224	1.00001
																					GSTK1	0.170525	0.0391515	0	0	0.77551	0.985187
																					GPT2	0.158037	0.0196221	0	0	0.785714	0.963373
																					CYCS	0.037417	0.0134594	0	0	0.897959	0.948836
																					C5	0.250024	0.0392485	0	0	0.653061	0.942333
																					ARG1	0.0482224	0.039193	0	0	0.836735	0.92415
																					FKBP5	0.0607514	0.0128108	0	0	0.846939	0.920501
																					GZMM	0.119769	0.0234828	0	0	0.765306	0.908558
																					CAPZA1	0.233229	0.00779255	0	0	0.632653	0.873675
																					CD58	0.233883	0.0845693	0	0	0.55102	0.869473
																					GLUD1	0.0406482	0.0321149	0	0	0.795918	0.868681
																					BAD	0.11152	0.0444003	0	0	0.704082	0.860002
																					GBP5	0	0.0421856	0	0	0.816327	0.858512
																					TKTL1	0.414721	0.0313282	0	0	0.357143	0.803192
																					AURKA	0.0397546	0.0472469	0	0	0.714286	0.801287
																					NDUFAF5	0.474109	0.240585	0	0	0.0408163	0.75551
																					CASP7	0.139185	0.0025455	0	0	0.612245	0.753975
																					BRCA1	0.0482353	0.00816701	0	0	0.693878	0.75028
																					CENPM	0.100805	0	0	0	0.642857	0.743662
																					C3AR1	0.0520413	0.0169136	0	0	0.663265	0.73222
																					APAF1	0.196472	0.0495724	0	0	0.479592	0.725636
																					MKI67	0.452574	0.141409	0	0	0.122449	0.716432
																					CAST	0.0650537	0.0334555	0	0	0.602041	0.70055
																					BUB1B	0.0140623	0	0	0	0.683673	0.697736
																					HMGB2	0.388593	0.0503857	0	0	0.234694	0.673672
																					CFH	0.121583	0.0189868	0	0	0.530612	0.671182
																					LAP3	0.467528	0.00432635	0	0	0.183673	0.655528
																					PGD	0.229243	0.00837766	0	0	0.377551	0.615172
																					TOP2A	0.247549	0.0198407	0	0	0.326531	0.593921
																					SCO2	0.106833	0.0557821	0	0	0.428571	0.591187
																					RPE	0.146762	0	0	0	0.438776	0.585538
																					SOCS3	0.184705	0.00805022	0	0	0.387755	0.58051
																					PSAT1	0.0867553	0.00873607	0	0	0.459184	0.554675
																					TTC19	0.188302	0.059813	0	0	0.295918	0.544033
																					SLC25A4	0.121424	0.0124406	0	0	0.408163	0.542028
																					PRPS2	0.0718158	0	0	0	0.469388	0.541204
																					WSB2	0.158086	0.00338997	0.0592103	0	0.306122	0.526809
																					PRDX3	0.00757316	0.00215726	0	0	0.489796	0.499526
																					ANXA1	0.220206	0.11657	0	0	0.153061	0.489837
																					VSIG4	0.172526	0.0213068	0	0	0.27551	0.469343
																					MSH6	0.314985	0.00334018	0	0	0.112245	0.43057
																					ADD3	0.0772648	0.00332796	0	0	0.346939	0.427532
																					IL1RN	0.206141	0.0230213	0	0	0.193878	0.423039
																					SLFN5	0.0146127	0	0	0	0.397959	0.412572
																					THEMIS2	0.0272896	0.0164657	0	0	0.367347	0.411102
																					OXCT1	0.151385	0	0	0	0.244898	0.396283
																					TYMS	0.108124	0	0	0	0.285714	0.393838
																					MCEMP1	0.136555	0.087679	0	0	0.163265	0.387499
																					WEE1	0.125099	0.0301924	0	0	0.204082	0.359373
																					LMNB1	0.131468	0.0457239	0	0	0.173469	0.350661
																					ANXA3	0.238599	0.0518733	0	0	0.0510204	0.341493
																					HMMR	0.0747821	0.0511908	0	0	0.214286	0.340259
																					MTPN	0.227291	0.0155429	0	0	0.0918367	0.334671
																					ZWINT	0.101073	0	0	0	0.22449	0.325563
																					OAT	0.0131673	0.0392854	0	0	0.255102	0.307555
																					MTHFD2	0.145459	0.0420331	0	0	0.102041	0.289533
																					MZB1	0.18771	0.0125843	0	0	0.0816327	0.281927
																					MCM2	0.10006	0.0113848	0	0	0.132653	0.244097
																					NDUFA2	0.128124	0.00212322	0	0	0.0714286	0.201676
																					MCM10	0.00957957	0.00633897	0	0	0.142857	0.158776
																					ASPM	0.0939664	0.00859351	0	0	0	0.10256
																					NDUFS1	0.0893082	0	0	0	0.0102041	0.0995123
																					NDUFB6	0.0146757	0.0336966	0	0	0.0204082	0.0687805

## Sheet: Critical vs Non-critical COVID
	Machine Learning Round 1										Machine Learning Round 2										Machine Learning Round 3
1		LR	RF	LDA	GB	SVM	Overall		Top 20 Features			LR	rf	LDA	GB	SVM	Overall		Top 10 Features			LR	ADB	LDA	GB	SVM	Overall		Top 20 Genes
	T Cell	1	1	0.795894	1	0.4	4.19589		Amino Acid Metabolism		T Cell	1	0.870851	0.864312	1	0.526316	4.26148		Amino Acid Metabolism		MCEMP1	1	1	0.224661	0.299244	0.140625	2.66453		C3AR1
	Inflammatory_Neutrophil	0.52915	0.876257	1	0.561244	0.942857	3.90951		CD40 Activated B Cell		Amino Acid Metabolism	0.755346	0.480178	0.777622	0.442889	0.263158	2.71919		CD40 Activated B Cell		SGK1	0.550354	0.166667	0.646922	0.00580524	0.984375	2.35412		CD28
	Amino Acid Metabolism	0.74741	0.199248	0.672669	0.155293	0.857143	2.63176		Cell Cycle		Inflammatory_Neutrophil	0.47853	1	0.574991	0.396303	0.157895	2.60772		Fatty Acid Alpha Oxidation		EIF2AK2	0.528374	0.166667	0.80734	0.0166165	0.78125	2.30025		CREM
	Unfolded Protein	0.627962	0.166517	0.682675	0.0800889	0.771429	2.32867		Dendritic Cell		Unfolded Protein	0.741523	0.225712	1	0.167469	0.315789	2.45049		Granulocyte		HIF1A	0.606532	0.166667	0.49469	0.0001213	0.9375	2.20551		EIF2AK2
	IFN	0.567957	0.428562	0.119488	0.155747	0.8	2.07176		Fatty Acid Alpha Oxidation		Pentose Phosphate Signature	0.757518	0.137291	0.904259	0.172019	0.473684	2.44477		Inflammatory_Neutrophil		CD28	0.226942	0.333333	0.201207	1	0.359375	2.12086		ERAP1
	Fatty Acid Alpha Oxidation	0.589767	0.271062	0.273248	0.134917	0.628571	1.89757		Granulocyte		Fatty Acid Alpha Oxidation	0.568097	0.165794	0.41911	0.183002	0.789474	2.12548		Pentose Phosphate Signature		TKTL1	0.835982	0.333333	0.224702	0.00252649	0.546875	1.94342		FKBP5
	CD40 Activated B Cell	0.184491	0.086454	0.374453	0.0196855	0.971429	1.63651		IFN		Granulocyte	0.122143	0.502435	0.596523	0.0175597	0.684211	1.92287		T Cell		SSR1	0.362162	0	1	0.00676091	0.484375	1.8533		GSTK1
	Plasma Cell	0.423791	0.0891845	0.338502	0.0458796	0.685714	1.58307		Inflammatory_Neutrophil		Tactivated	0.308379	0.463492	0.0334816	0.178656	0.842105	1.82611		Tactivated		IL23R	0.434021	0.333333	0.119277	0.00023694	0.90625	1.79312		H2BC21
	Tactivated	0.244318	0.745163	0.100288	0.0960333	0.371429	1.55723		LDG		Treg	0.276041	0.571219	0.156855	0.12612	0.631579	1.76181		Treg		GSTK1	0.675711	0.166667	0.195934	0.00057083	0.71875	1.75763		H2BC5
	Treg	0.371482	0.41584	0.181498	0.11443	0.428571	1.51182		MHC II		CD40 Activated B Cell	0.164184	0.00837881	0.558725	0.061584	0.947368	1.74024		Unfolded Protein		IFI44L	0.645127	0	0.17514	0.00378303	0.875	1.69905		HAAO
	Pentose Phosphate Signature	0.561297	0.138656	0.526398	0.0587443	0.2	1.48509		NK Cell		ROS Protection	0.271618	0.352993	0.178193	0.147365	0.736842	1.68701				ERAP1	0.30966	0	0.736088	0	0.640625	1.68637		HIF1A
	MHC II	0.505694	0.301146	0.234683	0.24706	0.114286	1.40287		NLRP3 Inflammasome		MHC II	0.49026	0.295546	0.231535	0.271929	0.368421	1.65769				SP100	0.236202	0	0.953044	0.00038725	0.4375	1.62713		IFI44L
	Granulocyte	0.0994349	0.190048	0.230308	0.00045454	0.828571	1.34882		pDC		IFN	0.511596	0.573529	0.0997446	0.304148	0.0526316	1.54165				CREM	0.251477	0.166667	0.552071	0	0.65625	1.62646		IL23R
	Dendritic Cell	0.237542	0.143886	0.0566652	0.145625	0.742857	1.32658		Pentose Phosphate Signature		LDG	0.512837	0.16887	0.421893	0.117512	0.210526	1.43164				MAN1A1	0.494652	0.833333	0.220605	2.26e-07	0.03125	1.57984		MAN1A1
	LDG	0.582309	0.0553692	0.247436	0.230921	0.142857	1.25889		Plasma Cell		Plasma Cell	0.449872	0	0.511156	0.00217207	0.421053	1.38425				H2BC21	0.418551	0.333333	0.13477	6.8e-05	0.6875	1.57422		MCEMP1
	Cell Cycle	0.067494	0.0249064	0.252168	0.00304549	0.885714	1.23333		ROS Protection		NK Cell	0	0.223422	0.0317308	0.0737668	1	1.32892				FKBP5	0.562697	0	0.419203	0.00025007	0.578125	1.56028		PIGK
	NLRP3 Inflammasome	0.0490058	0.11554	0.0823093	0.0373271	0.914286	1.19847		T Cell		Cell Cycle	0.0713864	0.0125096	0.277051	0	0.894737	1.25568				C3AR1	0.524928	0	0.269638	0.00232095	0.75	1.54689		SGK1
	ROS Protection	0.230618	0.121828	0.20023	0.0214362	0.571429	1.14554		Tactivated		NLRP3 Inflammasome	0.0492563	0.170919	0	0.0955323	0.578947	0.894655				H2BC5	0.642396	0	0.0596215	0.00257594	0.8125	1.51709		SP100
	NK Cell	0.159208	0.157317	0.0606032	0.0465701	0.714286	1.13798		Treg		Dendritic Cell	0.206075	0.112774	0.137147	0.0457597	0	0.501755				PIGK	0.0367225	0	0.388876	3.35e-07	1	1.4256		SSR1
	pDC	0	0.0638044	0	0.0448952	1	1.1087		Unfolded Protein		pDC	0.0972093	0.123039	0.0563425	0.0918393	0.105263	0.473694				HAAO	0.271037	0.5	0	0.0077348	0.609375	1.38815		TKTL1
	Oxidative Phosphorylation	0.216588	0	0.17492	0.0415865	0.657143	1.09024					Random Forest	LDA	GradientBoosting	SVM	KNN	Overall		Top 10 Features		PGD	0.3911	0.166667	0.438031	0	0.375	1.3708
	Cytotoxic, Activated T Cell	0.286922	0.379817	0.341118	0.0339744	0	1.04183				T Cell	1	0.590772	1	1	0.789474	4.38025		Amino Acid Metabolism		CD226	0.400012	0.166667	0.044831	0	0.734375	1.34589
	Anergic / Activated T cells	0.375081	0.406279	0.13362	0.019526	0.0857143	1.02022				Inflammatory_Neutrophil	0.749332	0.693447	0.672757	0.263158	0.631579	3.01027		Cytotoxic, Activated T Cell		TRAM1	0.189173	0	0.586339	0.00485859	0.5625	1.34287
	Proinflammatory IL-1 Family	0.0173546	0.180196	0.158993	0.0629556	0.6	1.0195				Amino Acid Metabolism	0.281623	0.825422	0.296767	0.473684	0.894737	2.77223		Fatty Acid Alpha Oxidation		CARD16	0.127509	0.166667	0.185706	0.00031667	0.828125	1.30832
	Monocyte	0.0381634	0.528995	0.391055	0.00133384	0.0571429	1.01669				Fatty Acid Beta Oxidation	0.263172	0.280526	0.303289	0.789474	1	2.63646		Fatty Acid Beta Oxidation		NT5C3A	0.160723	0.333333	0.509876	0.037798	0.265625	1.30735
	Apoptosis	0.023638	0.140321	0.16757	0.111947	0.542857	0.986333				MHC II	0.402616	0.173894	0.27518	0.736842	0.842105	2.43064		Inflammatory_Neutrophil		OXCT1	0.176474	0	0.390322	0.0821222	0.59375	1.24267
	Glycolysis	0.23703	0.327631	0.0335429	0.139321	0.228571	0.966096				TNF	0.0826693	0.259785	0	0.947368	0.947368	2.23719		MHC II		H2AC6	0.228855	0.166667	0.118789	0.0126634	0.703125	1.2301
	Erythrocytes	0.374086	0.0635183	0.153903	0	0.314286	0.905794				Fatty Acid Alpha Oxidation	0.241367	0.427346	0.281411	0.684211	0.473684	2.10802		T Cell		CANX	0.0383908	0.166667	0.154974	0.00163149	0.859375	1.22104
	Fatty Acid Beta Oxidation	0.124192	0.12868	0.111224	0.157348	0.342857	0.864301				Unfolded Protein	0.213957	0.630363	0.183323	0.421053	0.526316	1.97501		TNF		CAST	0.242191	0.166667	0.589405	0	0.203125	1.20139
	Alternative Complement Pathway	0.185902	0.0572672	0.117912	0.0280975	0.457143	0.846322				Cytotoxic, Activated T Cell	0.190147	0.280026	0.0847369	0.894737	0.368421	1.81807		Treg		PRPS2	0.00807764	0	0.728209	0	0.40625	1.14254
	TNF	0.00238689	0.257296	0.0400998	0.000395951	0.485714	0.785893				Treg	0.582392	0.215182	0.0649348	0.526316	0.421053	1.80988		Unfolded Protein		GOLT1B	0.212419	0	0.00619475	6.63e-05	0.921875	1.14056
	Classical Complement Pathway	0.0444816	0.00822741	0.0583717	0.00187728	0.514286	0.627244				IFN	0.630002	0.0176064	0.390598	0	0.736842	1.77505				ADD3	0.0681605	0	0.10327	0.00212557	0.953125	1.12668
	TCA cycle	0.0775793	0.0788255	0.173703	0.00415727	0.285714	0.619979				Pentose Phosphate Signature	0.0769331	1	0.218955	0.210526	0.0526316	1.55905				CLEC4D	0.0513267	0	0.0894489	9.2e-05	0.96875	1.10962
	Platelets	0.0514569	0.0346986	0.10865	0.00528776	0.257143	0.457236				Oxidative Phosphorylation	0.0593602	0.194584	0.126308	0.368421	0.684211	1.43288				SAMD9	0.263121	0	0.366292	9.7e-05	0.46875	1.09826
	Anti inflammation	0.0958219	0.00759584	0.148141	0.00229771	0.171429	0.425285				LDG	0.114466	0.328056	0.228786	0.157895	0.578947	1.40815				DERL1	0.263439	0.166667	0.226369	0.11686	0.3125	1.08583
	NFkB Complex	0.241242	0.00364515	0.066277	0.0343609	0.0285714	0.374097				Alternative Complement Pathway	0.0288704	0.216266	0.0219596	0.842105	0.263158	1.37236				CD177	0.651868	0	0.098365	0	0.328125	1.07836
2		LR	RF	ADB	GB	SVM	Overall		Top 20 Features		Tactivated	0.443712	0.103357	0.0647954	0.578947	0.157895	1.34871				IKZF2	0	0	0.231191	0	0.796875	1.02807
	Inflammatory_Neutrophil	0.566735	1	0.4	0.948089	0.971429	3.88625		Alternative Complement Pathway		NFkB Complex	0	0.219219	0.0941191	0.631579	0.105263	1.05018				GBP5	0.0456962	0	0.0883056	4.61e-05	0.890625	1.02467
	T Cell	1	0.790842	1	1	0.0571429	3.84798		Amino Acid Metabolism		CD40 Activated B Cell	0.00974318	0.334956	0.0530119	0.105263	0.315789	0.818764				RPE	0.06252	0.166667	0.317631	0	0.453125	0.999942
	MHC II	0.446746	0.183978	0.4	0.2146	0.8	2.04532		Apoptosis		Dendritic Cell	0.00970072	0.131107	0.0884763	0.315789	0.210526	0.7556				GBP4	0.0573547	0	0.110407	0.0464938	0.765625	0.979881
	Amino Acid Metabolism	0.721018	0.226425	0.6	0.360635	0.0857143	1.99379		CD40 Activated B Cell		Apoptosis	0.205131	0	0.0219485	0.0526316	0	0.279711				ANXA1	0.324782	0	0.138119	0	0.515625	0.978526
	IFN	0.591156	0.294127	0.2	0.126512	0.714286	1.92608		Cytotoxic, Activated T Cell			RF	DTREE	GB	SVM	NB	Overall		Top 10 Features		TFRC	0.278964	0.166667	0.434588	0	0.09375	0.973968
	Tactivated	0.227606	0.549731	0.4	0.0798919	0.6	1.85723		Dendritic Cell		T Cell	1	1	1	0.315789	0.210526	3.52632		Anergic / Activated T cells		SLC27A2	0.407501	0.166667	0.00434913	4.45e-05	0.390625	0.969186
	Fatty Acid Alpha Oxidation	0.565489	0.204679	0.6	0.124765	0.342857	1.83779		Fatty Acid Alpha Oxidation		Inflammatory_Neutrophil	0.738755	0.513403	0.55527	0	0.578947	2.38638		Apoptosis		DNAJC3	0.0707256	0	0.0024275	0.00890279	0.84375	0.925806
	CD40 Activated B Cell	0.256421	0.129595	0.4	0.124274	0.914286	1.82457		Fatty Acid Beta Oxidation		Unfolded Protein	0.221328	0.242523	0.276885	0.578947	1	2.31968		Cytotoxic, Activated T Cell		TRAM2	0.166442	0	0.0684489	0	0.671875	0.906766
	Fatty Acid Beta Oxidation	0.111446	0.141995	0.2	0.398829	0.828571	1.68084		IFN		Dendritic Cell	0.0239319	0.346512	0.235407	1	0.526316	2.13217		Dendritic Cell		SLFN5	0.332153	0.333333	0.177111	0.0143725	0.046875	0.903844
	Pentose Phosphate Signature	0.653036	0.104842	0.4	0.150846	0.371429	1.68015		Inflammatory_Neutrophil		MHC II	0.129576	0.164684	0.199127	0.789474	0.842105	2.12497		Granulocyte		PSAT1	0.273467	0	0.176362	0	0.421875	0.871703
	Cytotoxic, Activated T Cell	0.268355	0.249454	0.2	0.0685208	0.885714	1.67204		LDG		Granulocyte	0.19561	0	0.0285164	0.947368	0.684211	1.85571		Inflammatory_Neutrophil		MTPN	0.0241424	0.166667	0.492082	0.00047361	0.1875	0.870865
	Unfolded Protein	0.643182	0.184346	0	0.0728749	0.685714	1.58612		MHC II		Cytotoxic, Activated T Cell	0.202988	0	0.0390828	0.684211	0.894737	1.82102		MHC II		IFITM2	0.0774102	0	0.164177	0	0.625	0.866587
	Alternative Complement Pathway	0.235623	0.0561657	0.4	0.0163998	0.857143	1.56533		NFkB Complex		Apoptosis	0.323823	0	0.0368593	0.894737	0.473684	1.7291		T Cell		ANXA3	0.270444	0	0.352396	0.0423099	0.15625	0.8214
	Treg	0.326817	0.284129	0.4	0.0552876	0.428571	1.4948		Oxidative Phosphorylation		Anergic / Activated T cells	0.197229	0.0569062	0	0.368421	0.947368	1.56992		Tactivated		ARG1	0.297105	0	0.0188385	0.0020576	0.5	0.818001
	Apoptosis	0.0575012	0.195718	0.2	0.0400596	0.942857	1.43614		Pentose Phosphate Signature		Tactivated	0.645278	0	0.0679808	0.526316	0.315789	1.55536		Unfolded Protein		CCR3	0.120069	0.333333	0.0579024	0.0283962	0.21875	0.758451
	Oxidative Phosphorylation	0.227136	0.0358041	0.6	0.0531064	0.485714	1.40176		T Cell		TNF	0.114061	0.110662	0.00856902	0.473684	0.789474	1.49645				CAPZA1	0.146124	0	0.0645406	0.0121184	0.53125	0.754033
	LDG	0.586596	0.0553176	0.4	0.182304	0.171429	1.39565		Tactivated		Treg	0.542791	0	0.0391926	0.263158	0.631579	1.47672				ERGIC2	0.264229	0	0.354581	0	0.109375	0.728185
	TNF	0.0349698	0.172376	0.4	9.12e-05	0.771429	1.37887		TNF		Amino Acid Metabolism	0.182833	0.111465	0.270282	0.842105	0.0526316	1.45932				KCNA3	0.244805	0	0.0995474	9.86e-05	0.34375	0.688201
	NFkB Complex	0.306599	0.06771	0.6	0.0413064	0.257143	1.27276		Treg		Proinflammatory IL-1 Family	0.0864454	0.100771	0.0478838	0.210526	0.736842	1.18247				EOMES	0.353625	0	0.148768	0.00275412	0.171875	0.677022
	Dendritic Cell	0.2308	0.0777948	0.2	0.128989	0.628571	1.26615		Unfolded Protein		Glycolysis	0.154633	0.0604628	0.0918729	0.736842	0.105263	1.14907				SPTLC2	0.0446099	0.333333	0.0581921	0.00071819	0.234375	0.671229
	ROS Protection	0.267353	0.155565	0.2	0.0322932	0.514286	1.1695				Fatty Acid Alpha Oxidation	0.134364	0.201543	0.0533518	0.631579	0	1.02084				LAP3	0.0419232	0.333333	0.222426	8.59e-05	0.015625	0.613394
	Erythrocytes	0.319138	0.0887189	0.2	0.00737959	0.542857	1.15809				NLRP3 Inflammasome	0.0209402	0	0.103299	0.421053	0.368421	0.913713				CD69	0.340096	0	0.0222417	0.00056599	0.25	0.612904
	Anti inflammation	0.023844	0.115416	0	0.015899	1	1.15516				LDG	0.0879738	0.184459	0.202802	0.157895	0.263158	0.896288				CFL1	0.291441	0	0.0089751	0	0.28125	0.581666
	Monocyte	0.0520061	0.420264	0	0.0121997	0.657143	1.14161				Erythrocytes	0	0.080617	0.00554144	0.0526316	0.421053	0.559843				OAT	0.0451881	0	0.239449	0	0.296875	0.581512
	Anergic / Activated T cells	0.392633	0.263583	0	0.00011378	0.457143	1.11347				Fatty Acid Beta Oxidation	0.0659673	0	0.203949	0.105263	0.157895	0.533075				MANEA	0.0600466	0.166667	0.191489	2.09e-05	0.125	0.543223
	Proinflammatory IL-1 Family	0.00060726	0.313208	0.2	0.0241102	0.571429	1.10935					RF	ADB	GB	SVM	KNN	Overall		Top 10 Features		AASS	0.243975	0.166667	0.0571007	0.00025012	0.0625	0.530493
	Platelets	0.00995328	0.0422037	0.2	0.00720173	0.742857	1.00222				IFN	0.883324	0.5	0.46419	0.789474	1	3.63699		IFN		ISG20	0.0949829	0	0.356442	0.005953	0	0.457378
	Glycolysis	0.301747	0.14348	0	0.13305	0.314286	0.892563				Inflammatory_Neutrophil	0.892129	0.125	0.52047	0.736842	0.947368	3.22181		Amino Acid Metabolism		TNFRSF9	0.279632	0	0.0158246	0	0.078125	0.373581
	Plasma Cell	0.410612	0.0515805	0	0	0.4	0.862192				Apoptosis	0.312545	1	0.139201	0.894737	0.736842	3.08332		Apoptosis			RF	ADB	LDA	GB	SVM	Overall		Top 20 Genes
	NK Cell	0.0806037	0.125598	0.4	0.0099488	0.0285714	0.644722				T Cell	1	0.375	1	0.263158	0.157895	2.79605		Cytotoxic, Activated T Cell		CD28	1	0.6	0.152223	1	0.484375	3.2366		ADD3
	Classical Complement Pathway	0.0389444	0.0295057	0.4	0.00195989	0.142857	0.613267				Tactivated	0.799038	0.25	0.222484	0.684211	0.578947	2.53468		Fatty Acid Beta Oxidation		MCEMP1	0.285955	1	0.173487	0.285053	0.390625	2.13512		ARG1
	pDC	0	0.0469274	0.2	0.0256044	0.285714	0.558246				Amino Acid Metabolism	0.47778	0.5	0.387047	0.631579	0.210526	2.20693		Inflammatory_Neutrophil		EIF2AK2	0.136816	0.4	0.855183	0.0144715	0.640625	2.0471		CD177
	Granulocyte	0.135578	0.189723	0.2	0.00191733	0	0.527219				LDG	0.334586	0.375	0.32035	1	0.0526316	2.08257		LDG		SP100	0.0492491	0	0.882841	0	1	1.93209		CD28
	TCA cycle	0.0285194	0.0606872	0	0.115547	0.2	0.404753				Unfolded Protein	0.411293	0	0.391842	0.578947	0.684211	2.06629		T Cell		ERAP1	0.0490687	0	0.741766	1.06e-05	0.921875	1.71272		CREM
	NLRP3 Inflammasome	0.00883491	0.109466	0	0.00626465	0.228571	0.353137				Cytotoxic, Activated T Cell	0.238495	0.25	0.166559	0.526316	0.842105	2.02348		Tactivated		SSR1	0.0236793	0	1	0.00040261	0.6875	1.71158		EIF2AK2
	Cell Cycle	0.112707	0	0	0.0193803	0.114286	0.246373				Fatty Acid Beta Oxidation	0.410304	0.375	0.291463	0.473684	0.315789	1.86624		Unfolded Protein		LAP3	0.0189123	0.2	0.393029	2.46e-05	0.9375	1.54947		EOMES
3		LR	RF	GB	SVM	KNN	Overall		Top 20 Features		Plasma Cell	0.0636908	0.5	0.0571929	0.842105	0.368421	1.83141				CD177	0.675109	0	0.0753073	0	0.765625	1.51604		ERAP1
	T Cell	1	1	1	1	0.714286	4.71429		Amino Acid Metabolism		Fatty Acid Alpha Oxidation	0.238871	0.25	0.14392	0.947368	0.105263	1.68542				OAT	0.0764667	0.2	0.373192	0	0.84375	1.49341		ERGIC2
	Inflammatory_Neutrophil	0.545504	0.974637	0.536217	0.314286	0.914286	3.28493		Anergic / Activated T cells		Anergic / Activated T cells	0.261185	0.25	0.00841164	0.210526	0.894737	1.62486				H2BC5	0.138584	0.2	0.129317	0	0.96875	1.43665		FKBP5
	Erythrocytes	0.35341	0.0829027	0.00106777	0.828571	0.885714	2.15167		Apoptosis		Glycolysis	0.443754	0.25	0.221762	0.105263	0.526316	1.54709				ISG20	0.00857017	0.2	0.296956	0.00538719	0.890625	1.40154		H2BC5
	Fatty Acid Beta Oxidation	0.095449	0.20933	0.180911	0.628571	1	2.11426		Cytotoxic, Activated T Cell		Cell Cycle	0	0	0.0286985	0.368421	0.789474	1.18659				ADD3	0.0769566	0	0.459984	4.17e-05	0.859375	1.39636		HIF1A
	Amino Acid Metabolism	0.746894	0.24419	0.158865	0.0857143	0.8	2.03566		Dendritic Cell		Pentose Phosphate Signature	0.0174896	0.375	0.106661	0.421053	0.263158	1.18336				SAMD9	0.148489	0	0.430105	0	0.8125	1.39109		ISG20
	Granulocyte	0.101597	0.25096	7.8625e-05	0.8	0.857143	2.00978		Erythrocytes		Erythrocytes	0.0914897	0.125	0.0071473	0.315789	0.631579	1.17101				ERGIC2	0.109957	0	0.359475	0.00010681	0.90625	1.37579		LAP3
	Treg	0.401248	0.633417	0.169376	0.428571	0.371429	2.00404		Fatty Acid Alpha Oxidation		Monocyte	0.202804	0.25	0	0.157895	0.473684	1.08438				EOMES	0.570444	0.2	0.121114	0.00246945	0.453125	1.34715		MCEMP1
	Unfolded Protein	0.707971	0.183614	0.10418	0.685714	0.285714	1.96719		Fatty Acid Beta Oxidation		Dendritic Cell	0.0824029	0.125	0.246109	0.0526316	0.421053	0.927196				HIF1A	0.0973758	0.6	0.492123	0	0.140625	1.33012		OAT
	NLRP3 Inflammasome	0.0332162	0.151828	0.0906802	0.914286	0.771429	1.96144		Glycolysis		Classical Complement Pathway	0.0569199	0.375	0.0300123	0	0	0.461932				ARG1	0.372517	0	0	0.00183348	0.953125	1.32748		SAMD9
	MHC II	0.538654	0.353255	0.211903	0.228571	0.6	1.93238		Granulocyte			LR	RF	DTREE	GB	SVM	Overall		Top 10 Features		FKBP5	0.0358516	0	0.427457	0.00049352	0.796875	1.26068		SGK1
	Anergic / Activated T cells	0.360133	0.24454	0.0034154	0.857143	0.457143	1.92237		Inflammatory_Neutrophil		T Cell	1	1	0.0600936	1	1	4.06009		Amino Acid Metabolism		SGK1	0.578604	0	0.564774	0.00357343	0.09375	1.2407		SP100
	Apoptosis	0	0.204957	0.0132825	0.714286	0.971429	1.90395		LDG		Inflammatory_Neutrophil	0.608592	0.701514	1	0.840736	0.421053	3.57189		Fatty Acid Beta Oxidation		CREM	0.0496503	0	0.611064	0	0.5625	1.22321		SSR1
	LDG	0.593101	0.136267	0.23266	0.285714	0.628571	1.87631		MHC II		Fatty Acid Beta Oxidation	0.0440563	0.100372	0.580177	0.472937	0.947368	2.14491		IFN		NT5C3A	0.0727239	0	0.529474	0.0114304	0.609375	1.223
	TNF	0.0250927	0.272405	0.000450024	0.771429	0.742857	1.81223		NLRP3 Inflammasome		Unfolded Protein	0.598142	0.258812	0.48492	0.285717	0.473684	2.10128		Inflammatory_Neutrophil		DERL1	0.129695	0.2	0.161323	0.104119	0.625	1.22014
	Dendritic Cell	0.290253	0.116714	0.14538	0.885714	0.342857	1.78092		Proinflammatory IL-1 Family		LDG	0.36021	0	0.427333	0.27597	0.789474	1.85299		LDG		CANX	0.183505	0.2	0.0149716	6.13e-05	0.75	1.14854
	Tactivated	0.326827	0.70134	0.0940783	0.4	0.257143	1.77939		T Cell		Tactivated	0.341553	0.427662	0	0.169853	0.736842	1.67591		Pentose Phosphate Signature		CCR3	0.208136	0.6	0.0557446	0.0322191	0.25	1.1461
	Glycolysis	0.231292	0.290394	0.140162	0.971429	0.114286	1.74756		Tactivated		IFN	0.523226	0.583101	0	0.212059	0.263158	1.58154		ROS Protection		CAST	0.0310996	0.2	0.574727	0	0.328125	1.13395
	Cytotoxic, Activated T Cell	0.360567	0.293971	0.0358508	0.514286	0.542857	1.74753		TNF		Amino Acid Metabolism	0.77199	0.108072	0.111672	0.505292	0	1.49703		T Cell		PIGK	0.039297	0	0.369439	0	0.71875	1.12749
	Fatty Acid Alpha Oxidation	0.625451	0.203568	0.0882545	0.657143	0.171429	1.74584		Treg		Pentose Phosphate Signature	0.60982	0.0347283	0	0.0630564	0.684211	1.39182		Tactivated		PRPS2	0.0517241	0	0.730033	0	0.28125	1.06301
	Proinflammatory IL-1 Family	0.00394967	0.307199	0.0816847	0.742857	0.514286	1.64998		Unfolded Protein		ROS Protection	0.335595	0.225416	0.106478	0.0318615	0.631579	1.33093		Unfolded Protein		HAAO	0.290013	0.6	0.0515636	0	0.109375	1.05095
	IFN	0.555212	0.322169	0.217541	0.342857	0.0857143	1.52349				Alternative Complement Pathway	0.328866	0.0453177	0	0.0197356	0.894737	1.28866				CD69	0.0278423	0	0.0360456	0.00091091	0.984375	1.04917
	Monocyte	0.0310898	0.474432	0.0053283	0.942857	0	1.45371				MHC II	0.465226	0.231942	0	0.369124	0.0526316	1.11892				SPTLC2	0	0.8	0.149423	0.00575042	0.078125	1.0333
	Oxidative Phosphorylation	0.268326	0.0541096	0.0446172	0.257143	0.828571	1.45277				pDC	0.00802608	0.107337	0	0.145547	0.842105	1.10301				H2BC21	0.142363	0.6	0.0790333	0.0014137	0.203125	1.02594
	Alternative Complement Pathway	0.20191	0.085878	0.00542111	0.457143	0.685714	1.43607				Dendritic Cell	0.237679	0.0941852	0.110094	0.0670101	0.578947	1.08792				TNFRSF9	0.0705026	0	0.0764197	0.00156863	0.875	1.02349
	Plasma Cell	0.444661	0.0432427	0.0469797	0.371429	0.485714	1.39203				Monocyte	0.0639661	0.336875	0	0.0192853	0.526316	0.946443				GSTK1	0.0206946	0.2	0.130461	0.00013059	0.65625	1.00754
	ROS Protection	0.303932	0.269145	0.0366023	0.2	0.571429	1.38111				Apoptosis	0.0155529	0.155893	0.216701	0.114051	0.315789	0.817988				SLFN5	0.016023	0.4	0.171791	0.00224013	0.40625	0.996304
	Cell Cycle	0.0901117	0	0.00265646	0.171429	0.942857	1.20705				NFkB Complex	0.188243	0.0947776	0	0.0708751	0.368421	0.722317				CLEC4D	0.37221	0	0.0745829	0.00038847	0.546875	0.994056
	TCA cycle	0.0420012	0.105312	0.00127921	0.6	0.428571	1.17716				Cytotoxic, Activated T Cell	0.0680614	0.332386	0.0571622	0.0791112	0.157895	0.694615				OXCT1	0.503881	0	0.121134	0.0421008	0.3125	0.979615
	Pentose Phosphate Signature	0.644345	0.156975	0.106496	0.142857	0.0571429	1.10782				Anergic / Activated T cells	0.35616	0.18322	0	0	0.105263	0.644643				CFL1	0.117787	0	0.0159423	0.00168146	0.828125	0.963536
	pDC	0.0449082	0.121556	0.0967032	0.571429	0.2	1.0346				TNF	0	0.188663	0	0.0575529	0.210526	0.456743				MAN1A1	0.0713431	0.4	0.128289	0.00104894	0.359375	0.960056
	NFkB Complex	0.318142	0.0515174	0.0556025	0.114286	0.4	0.939547					RF	ADB	LDA	GB	SVM	Overall		Top 10 Features		RPE	0.00143711	0	0.370213	0	0.578125	0.949775
	Platelets	0.0651622	0.0453114	0.00659275	0.485714	0.228571	0.831352				T Cell	0.818963	0.333333	0.719327	1	0.631579	3.5032		Amino Acid Metabolism		CARD16	0.114706	0.2	0.086908	0	0.53125	0.932864
	Anti inflammation	0.0768332	0.0362211	0.0256807	0	0.657143	0.795878				Amino Acid Metabolism	0.328682	1	0.617588	0.23064	0.421053	2.59796		Apoptosis		GBP5	0.0273968	0	0.169221	0	0.734375	0.930993
	NK Cell	0.14764	0.250683	0.0150215	0.0285714	0.314286	0.756202				Inflammatory_Neutrophil	1	0.333333	0.214048	0.975656	0.0526316	2.57567		IFN		MTPN	0.0186486	0.4	0.451532	0.00752459	0.046875	0.92458
	Classical Complement Pathway	0.0115114	0.032015	0.00318344	0.542857	0.142857	0.732424				Apoptosis	0.194504	0.666667	0.347486	0.0215479	1	2.2302		Inflammatory_Neutrophil		ANXA3	0.216624	0.2	0.316833	0.00302297	0.15625	0.892731
	CD40 Activated B Cell	0.215363	0.0797142	0	0.0571429	0.0285714	0.380791				Treg	0.573002	0.333333	0.0723715	0.365745	0.842105	2.18656		NFkB Complex		IFI44L	0.0990562	0.2	0.149161	0.00340616	0.421875	0.873498
4		LR	RF	LDA	GB	SVM	Overall		Top 20 Features		Unfolded Protein	0.371271	0.166667	1	0.171052	0.473684	2.18267		Pentose Phosphate Signature		GOLT1B	0.00265173	0.2	0.0680007	0.00466126	0.59375	0.869064
	T Cell	1	1	0.956891	1	0.742857	4.69975		Amino Acid Metabolism		IFN	0.969091	0	0.0945479	0.721036	0.210526	1.9952		T Cell		C3AR1	0.0594897	0	0.302955	0.00242961	0.5	0.864875
	Inflammatory_Neutrophil	0.459129	0.880599	0.997759	0.290814	0.228571	2.85687		Anergic / Activated T cells		Pentose Phosphate Signature	0.0739092	0.166667	0.586798	0.180709	0.789474	1.79756		Tactivated		DNAJC3	0.0320642	0	0.0421877	0.00815721	0.78125	0.863659
	Unfolded Protein	0.67703	0.203737	1	0.252619	0.485714	2.6191		Apoptosis		NFkB Complex	0.0143725	0.833333	0.0464032	0.055049	0.736842	1.686		Treg		GBP4	0.051208	0	0.0557188	0.0321136	0.703125	0.842165
	Pentose Phosphate Signature	0.598473	0.205976	0.74881	0.102498	0.771429	2.42719		Cell Cycle		Tactivated	0.502203	0	0.178466	0.3064	0.684211	1.67128		Unfolded Protein		PGD	0.00790277	0.2	0.436669	0.00343621	0.1875	0.835508
	IFN	0.469912	0.47295	0.194857	0.231142	1	2.36886		Classical Complement Pathway		Fatty Acid Beta Oxidation	0.145839	0.166667	0.304393	0.389729	0.578947	1.58558				TFRC	0.0243223	0	0.451812	0	0.34375	0.819884
	Fatty Acid Alpha Oxidation	0.648447	0.218937	0.44748	0.0751284	0.714286	2.10428		Cytotoxic, Activated T Cell		Glycolysis	0.196447	0.166667	0.137517	0.184729	0.894737	1.5801				TRAM2	0.014921	0	0.0328437	0	0.671875	0.71964
	Amino Acid Metabolism	0.719665	0.223948	0.822746	0.233345	0.0857143	2.08542		Dendritic Cell		Plasma Cell	0	0	0.390972	0	0.947368	1.33834				KCNA3	0.0583184	0.2	0.159062	0	0.296875	0.714255
	Cytotoxic, Activated T Cell	0.277852	0.203747	0.401469	0.0384986	0.885714	1.80728		Erythrocytes		Fatty Acid Alpha Oxidation	0.298241	0.166667	0.27061	0.430488	0.105263	1.27127				IL23R	0.102087	0.2	0.112462	0.0176372	0.265625	0.697811
	Anergic / Activated T cells	0.418944	0.359593	0.209403	0.00069918	0.542857	1.5315		Fatty Acid Alpha Oxidation		Cytotoxic, Activated T Cell	0.257273	0.166667	0.214164	0.1772	0.368421	1.18372				TKTL1	0.200911	0.2	0.229867	0.00165158	0.015625	0.648054
	LDG	0.55908	0.116566	0.329424	0.0848191	0.371429	1.46132		Fatty Acid Beta Oxidation		Dendritic Cell	0.218024	0.166667	0.161507	0.209255	0.263158	1.01861				ANXA1	0.0374143	0	0.0888524	0	0.515625	0.641892
	Apoptosis	0.00232098	0.238886	0.204202	0.0383624	0.971429	1.4552		Glycolysis		Classical Complement Pathway	0.0974168	0	0.16095	0.100272	0.526316	0.884955				TRAM1	0.00357534	0	0.576231	0.00438631	0	0.584193
	Glycolysis	0.296244	0.323841	0.11822	0.0675517	0.628571	1.43443		IFN		pDC	0.0203065	0.333333	0.00632555	0.229331	0.157895	0.747191				H2AC6	0.0781383	0	0.0644849	0	0.4375	0.580123
	Cell Cycle	0.119646	0	0.361377	0.00495375	0.942857	1.42883		Inflammatory_Neutrophil		NK Cell	0.115793	0	0.0938917	0.0263375	0.315789	0.551812				IKZF2	0.083298	0	0.22	0.00378542	0.234375	0.541458
	Erythrocytes	0.348251	0.0787977	0.185272	0.00510401	0.8	1.41743		LDG		Erythrocytes	0.00554092	0	0	0.0171748	0	0.0227157				MANEA	0.030332	0	0.127385	1.39e-05	0.375	0.53273
	Tactivated	0.212063	0.724554	0.0938633	0.0557955	0.314286	1.40056		Monocyte			RF	LDA	SVM	KNN	NB	Overall		Top 10 Features		CD226	0.0198057	0	0.0268523	0	0.46875	0.515408
	Dendritic Cell	0.210752	0.149462	0.104067	0.0960851	0.828571	1.38894		Pentose Phosphate Signature		T Cell	1	0.914195	0.736842	0.578947	0.526316	3.7563		Cytotoxic, Activated T Cell		IFITM2	0.0604781	0	0.151033	0.00250609	0.21875	0.432768
	Fatty Acid Beta Oxidation	0.119846	0.222903	0.209131	0.142551	0.657143	1.35157		Plasma Cell		IFN	0.745862	0.207758	0.947368	0.631579	0.894737	3.4273		IFN		CAPZA1	0.0514945	0	0.1229	0.0114316	0.171875	0.357701
	Monocyte	0.10715	0.563775	0.328157	0	0.342857	1.34194		T Cell		Pentose Phosphate Signature	0.20826	0.912562	0.526316	0.421053	1	3.06819		Inflammatory_Neutrophil		AASS	0.0157997	0.2	0.0196451	0.00015268	0.0625	0.298097
	Classical Complement Pathway	0.00356673	0.155169	0.144234	0.0165825	0.914286	1.23384		Tactivated		Unfolded Protein	0.322884	1	0.368421	0.368421	0.947368	3.00709		Monocyte		PSAT1	0.00160113	0	0.115657	0.00032978	0.125	0.242588
	Plasma Cell	0.306815	0.0597942	0.382464	0.0477464	0.4	1.19682		Unfolded Protein		Inflammatory_Neutrophil	0.912282	0.253365	0.315789	1	0.473684	2.95512		Pentose Phosphate Signature		SLC27A2	0.124146	0	0.0297451	0.00129623	0.03125	0.186437
	Treg	0.288936	0.260351	0.162706	0.0395288	0.428571	1.18009				Monocyte	0.430624	0.507509	0.263158	0.789474	0.842105	2.83287		Plasma Cell			RF	ADB	LDA	GB	SVM	Overall		Top 20 Genes
	Anti inflammation	0.0384345	0.10276	0.127786	0.00193003	0.857143	1.12805				Tactivated	0.436113	0.103365	0.842105	0.842105	0.421053	2.64474		T Cell		CD28	1	0.2	0.192727	1	0.765625	3.15835		CANX
	MHC II	0.406302	0.252567	0.246531	0.189135	0.0285714	1.12311				Cytotoxic, Activated T Cell	0.264923	0.352354	0.684211	0.947368	0.210526	2.45938		Tactivated		SGK1	0.663382	0.6	0.600897	0.00629593	0.4375	2.30808		CARD16
	ROS Protection	0.19887	0.102952	0.178868	0.00172036	0.6	1.08241				Treg	0.797081	0.236609	0.473684	0.473684	0.368421	2.34948		Treg		MCEMP1	0.213872	1	0.180129	0.284932	0.359375	2.03831		CAST
	Granulocyte	0.00423545	0.27465	0.190762	0.00043817	0.571429	1.04151				Plasma Cell	0	0.417787	0.578947	0.736842	0.578947	2.31252		Unfolded Protein		EOMES	0.599139	0.2	0.101528	0.00237732	0.921875	1.82492		CD177
	TCA cycle	0.0648041	0.0478765	0.146316	0.0113964	0.685714	0.956107				LDG	0.173349	0.29774	1	0.684211	0.105263	2.26056				EIF2AK2	0.0937987	0	0.808917	0.0148117	0.90625	1.82378		CD28
	Proinflammatory IL-1 Family	0.0935882	0.170307	0.254196	0.0400697	0.285714	0.843875				Amino Acid Metabolism	0.268315	0.758544	0	0.157895	0.684211	1.86896				ERAP1	0.0542722	0	0.658067	9.05e-09	0.9375	1.64984		CREM
	TNF	0	0.212835	0.0846406	0.00167339	0.514286	0.813435				NFkB Complex	0.0925601	0.0287177	0.631579	0.315789	0.789474	1.85812				NT5C3A	0.121357	0.2	0.478002	0.0135682	0.828125	1.64105		DERL1
	Oxidative Phosphorylation	0.22903	0.0997425	0.228533	0.045436	0.171429	0.774169				Fatty Acid Alpha Oxidation	0.336253	0.468293	0.157895	0.210526	0.631579	1.80455				SSR1	0.0689908	0	1	0.00018308	0.53125	1.60042		EIF2AK2
	Alternative Complement Pathway	0.116579	0.0726366	0.107115	0.0147901	0.457143	0.768264				Alternative Complement Pathway	0.111836	0.231838	0.105263	0.526316	0.736842	1.71209				CAST	0.0236664	0.4	0.518219	0	0.625	1.56689		EOMES
	CD40 Activated B Cell	0.181459	0.0274531	0.463755	0.00078363	0	0.673451				CD40 Activated B Cell	0.0229434	0.413916	0.894737	0.0526316	0.157895	1.54212				CREM	0.035495	0.2	0.466506	1.37e-05	0.859375	1.56139		ERAP1
	NFkB Complex	0.233451	0.0312832	0.0753659	0.0454115	0.114286	0.499797				MHC II	0.188769	0.217816	0.0526316	0.894737	0.0526316	1.40659				CD177	0.749906	0	0.0905341	5.41e-09	0.71875	1.55919		HIF1A
	NK Cell	0.0673154	0.209264	0.0602391	0.00633668	0.142857	0.486012				ROS Protection	0.35842	0.168215	0.210526	0.263158	0.315789	1.31611				OAT	0.0657384	0.6	0.306868	1.06e-13	0.484375	1.45698		IKZF2
	pDC	0.0255955	0.174432	0	0.0384623	0.2	0.43849				Cell Cycle	0.0474852	0.19728	0.421053	0.105263	0.263158	1.03424				SP100	0.0627078	0.2	0.94554	0.00029551	0.21875	1.42729		MCEMP1
	Platelets	0.00309258	0.0244249	0.129589	0.00357652	0.257143	0.417826				Anergic / Activated T cells	0.221522	0	0.789474	0	0	1.011				OXCT1	0.511302	0.2	0.387396	0.0436394	0.203125	1.34546		MTPN
	NLRP3 Inflammasome	0.0284502	0.113587	0.0258607	0.0245518	0.0571429	0.249593					LR	RF	GB	SVM	KNN	Overall		Top 10 Features		DERL1	0.102734	0	0.228152	0.104515	0.875	1.3104		NT5C3A
5		LR	ADB	LDA	GB	SVM	Overall		Top 20 Features		T Cell	1	0.939026	0.887749	0.684211	0.894737	4.40572		Amino Acid Metabolism		HIF1A	0.0846357	0.4	0.434357	1.43e-12	0.390625	1.30962		OAT
	Inflammatory_Neutrophil	0.597869	0.5	1	1	0.942857	4.04073		Alternative Complement Pathway		Inflammatory_Neutrophil	0.508315	1	1	0.210526	0.578947	3.29779		Fatty Acid Alpha Oxidation		MTPN	0.0362442	0.2	0.503622	3.86e-05	0.5625	1.30241		OXCT1
	T Cell	1	0.666667	0.716097	0.602358	0.257143	3.24226		Amino Acid Metabolism		Fatty Acid Alpha Oxidation	0.497617	0.290639	0.281502	0.789474	1	2.85923		Granulocyte		CARD16	0.129979	0.4	0.137451	0	0.609375	1.27681		SGK1
	Amino Acid Metabolism	0.841334	0.666667	0.738457	0.367333	0.457143	3.07093		Anergic / Activated T cells		IFN	0.547769	0.733241	0.152718	0.631579	0.736842	2.80215		IFN		IKZF2	0.0676038	0	0.19642	0.00378607	1	1.26781		SP100
	LDG	0.641352	0.5	0.298075	0.457644	0.971429	2.8685		Apoptosis		Pentose Phosphate Signature	0.823705	0.320505	0.289373	0.947368	0.421053	2.802		Inflammatory_Neutrophil		CANX	0.136869	0	0.0961063	0.00072042	0.984375	1.21807		SSR1
	Unfolded Protein	0.787679	0	0.962974	0.199243	0.6	2.5499		Cytotoxic, Activated T Cell		Amino Acid Metabolism	0.824958	0.496842	0.499951	0.105263	0.842105	2.76912		Oxidative Phosphorylation		CLEC4D	0.322224	0	0.0654553	8.03e-05	0.8125	1.20026
	MHC II	0.424371	0.333333	0.201982	0.227	1	2.18669		Dendritic Cell		Treg	0.358516	0.504213	0.199666	0.368421	0.947368	2.37819		Pentose Phosphate Signature		PGD	0.0359415	0.2	0.406484	0.00342162	0.546875	1.19272
	IFN	0.561398	0.166667	0.185651	0.141328	0.914286	1.96933		Fatty Acid Beta Oxidation		Unfolded Protein	0.715303	0.286824	0.322201	0.473684	0.368421	2.16643		T Cell		TKTL1	0.14449	0	0.194995	0.00162835	0.84375	1.18486
	Pentose Phosphate Signature	0.713835	0.333333	0.666021	0.0104094	0.171429	1.89503		IFN		Granulocyte	0.261529	0.283393	0.0367096	0.894737	0.631579	2.10795		Treg		SLC27A2	0.211145	0	0.00046732	0.00143607	0.96875	1.1818
	Cytotoxic, Activated T Cell	0.492156	0.5	0.437611	0.0652778	0.342857	1.8379		Inflammatory_Neutrophil		Oxidative Phosphorylation	0.403186	0.236508	0.246822	0.315789	0.473684	1.67599		Unfolded Protein		CCR3	0.198491	0.2	0.0546537	0.0259338	0.65625	1.13533
	Fatty Acid Beta Oxidation	0.263333	0.166667	0	0.451764	0.828571	1.71034		LDG		LDG	0.558094	0.166342	0.406413	0	0.526316	1.65716				HAAO	0.315251	0.6	0.0230396	0	0.1875	1.12579
	pDC	0.0107738	1	0.0156838	0.0639946	0.485714	1.57617		MHC II		Alternative Complement Pathway	0.208396	0.056562	0.0841312	0.421053	0.789474	1.55962				KCNA3	0.0672279	0.2	0.124194	0	0.703125	1.09455
	ROS Protection	0.358766	0.166667	0.288314	0.0545616	0.685714	1.55402		Monocyte		ROS Protection	0.19825	0.231589	0.132713	0.736842	0.157895	1.45729				FKBP5	0.0369729	0.2	0.4435	0.00077755	0.40625	1.0875
	Apoptosis	0.0371968	0.5	0.261493	0.0156301	0.714286	1.52861		NFkB Complex		Plasma Cell	0.345237	0	0	1	0.105263	1.4505				ANXA3	0.221531	0	0.345179	0.00302349	0.515625	1.08536
	Dendritic Cell	0.354136	0.166667	0.131688	0.210808	0.628571	1.49187		pDC		Apoptosis	0.0792209	0.274928	0.16724	0.842105	0.0526316	1.41613				RPE	0.0414124	0	0.338608	3.16e-05	0.6875	1.06755
	Anergic / Activated T cells	0.369272	0	0.152599	0.0145343	0.885714	1.42212		Pentose Phosphate Signature		Platelets	0.0205251	0.0570377	0.00890858	0.526316	0.684211	1.297				PSAT1	0.00413575	0.2	0.0947632	0.00032983	0.75	1.04923
	NFkB Complex	0.29383	0.166667	0.0971418	0.0295675	0.8	1.38721		ROS Protection		MHC II	0.353789	0.291462	0.134122	0.263158	0	1.04253				MAN1A1	0.0610391	0.2	0.132489	1.25e-10	0.640625	1.03415
	Alternative Complement Pathway	0.194166	0.166667	0.122157	0.0402925	0.857143	1.38043		T Cell		Classical Complement Pathway	0.0209116	0.089741	0.00984814	0.578947	0.263158	0.962606				AASS	0.0129666	0	0.0361394	8.04e-09	0.953125	1.00223
	TNF	0.0246909	0.5	0.0394483	0.00411322	0.742857	1.31111		Tactivated		Proinflammatory IL-1 Family	0.134514	0.251576	0.10523	0.157895	0.210526	0.859742				DNAJC3	0.0570584	0	0.0277485	0.00815862	0.890625	0.98359
	Monocyte	0.130213	0.166667	0.240681	0.00378031	0.657143	1.19848		TNF		Cytotoxic, Activated T Cell	0	0.257791	0.0902297	0.0526316	0.315789	0.716442				CFL1	0.136388	0	0.0041141	0.00168175	0.796875	0.939059
	Tactivated	0.36937	0.166667	0.0419716	0.154903	0.428571	1.16148		Unfolded Protein			LR	RF	DTREE	GB	SVM	Overall		Top 10 Features		TRAM2	0.0207115	0.2	0.0428419	0	0.671875	0.935428
	Fatty Acid Alpha Oxidation	0.545015	0.166667	0.248112	0.0570606	0.142857	1.15971				T Cell	1	1	1	1	0.157895	4.15789		Dendritic Cell		CAPZA1	0.0584389	0.2	0.0583038	0.0116383	0.59375	0.922131
	Treg	0.309865	0.166667	0.167626	0.0496863	0.371429	1.06527				Inflammatory_Neutrophil	0.41845	0.645854	0.461482	0.486489	0.578947	2.59122		IFN		ERGIC2	0.0947807	0	0.395488	0.00030649	0.421875	0.91245
	Classical Complement Pathway	0.0484977	0.333333	0.136085	0.00042008	0.542857	1.06119				MHC II	0.410469	0.315655	0.103227	0.269211	0.947368	2.04593		Inflammatory_Neutrophil		ANXA1	0.0301654	0.2	0.139211	0.0005558	0.5	0.869932
	Plasma Cell	0.456793	0	0.354279	0.0102712	0.228571	1.04992				Pentose Phosphate Signature	0.675314	0.115487	0.171281	0.0776416	0.842105	1.88183		LDG		ARG1	0.386024	0	0.0247094	0.0017786	0.453125	0.865636
	Granulocyte	0.0445735	0	0.220396	0.00491902	0.771429	1.04132				IFN	0.600769	0.56789	0	0.113901	0.526316	1.80888		MHC II		PRPS2	0.0406098	0	0.727616	5.84e-14	0.09375	0.861975
	Cell Cycle	0.212828	0	0.382457	0.0122703	0.314286	0.921841				Tactivated	0.322753	0.444657	0.183515	0.0753959	0.684211	1.71053		Pentose Phosphate Signature		CD69	0.0438094	0	0.0346688	0.00089631	0.78125	0.860625
	CD40 Activated B Cell	0.192219	0	0.415039	0.11221	0.0857143	0.805182				LDG	0.424768	0.174935	0	0.0437396	1	1.64344		T Cell		SPTLC2	0.00810634	0.2	0.0339479	0.00575142	0.578125	0.825931
	Anti inflammation	0	0.166667	0.112337	0	0.514286	0.793289				Unfolded Protein	0.664032	0.22376	0	0.196026	0.473684	1.5575		Tactivated		C3AR1	0.0649304	0	0.287243	0.00242788	0.46875	0.823351
	Oxidative Phosphorylation	0.319711	0.166667	0.136571	0.0750458	0.0285714	0.726566				Dendritic Cell	0.266644	0.173284	0.236965	0.0727279	0.736842	1.48646		Treg		CD226	0.0343792	0	0.0221059	0	0.734375	0.79086
	Platelets	0.0119306	0	0.116226	0.00155916	0.571429	0.701144				Treg	0.319826	0.624982	0	0.150943	0.368421	1.46417		Unfolded Protein		TRAM1	0.00842847	0	0.60191	0.0044756	0.171875	0.786689
	Glycolysis	0.1375	0.166667	0.00328058	0.205022	0.114286	0.626755				Oxidative Phosphorylation	0.305634	0.188565	0.171888	0.10067	0.631579	1.39834				IFI44L	0.13245	0.2	0.175051	0.00731971	0.265625	0.780445
	TCA cycle	0.0214077	0.166667	0.012829	0.0257515	0.4	0.626655				Alternative Complement Pathway	0.253668	0.129067	0	0.00190144	0.894737	1.27937				IL23R	0.129671	0.2	0.103556	0.0180599	0.328125	0.779412
	NLRP3 Inflammasome	0.0116207	0	0.11019	0.19683	0.285714	0.604355				Amino Acid Metabolism	0.640171	0.207553	0.0802878	0.315977	0	1.24399				SAMD9	0.171492	0	0.35542	2.14e-12	0.25	0.776912
	Erythrocytes	0.231272	0	0.132811	0.0103344	0.2	0.574417				Fatty Acid Beta Oxidation	0.034092	0.245668	0.269418	0.397517	0.263158	1.20985				TFRC	0.0151675	0	0.446499	3.19e-10	0.3125	0.774166
	Proinflammatory IL-1 Family	0.125534	0	0.291688	0.052196	0.0571429	0.526561				Plasma Cell	0.369037	0	0	0.00188515	0.789474	1.1604				SLFN5	0.125101	0.4	0.187328	0.00841204	0.046875	0.767717
	NK Cell	0.112719	0.166667	0.071319	0.00287496	0	0.35358				Fatty Acid Alpha Oxidation	0.461496	0.253934	0	0.125932	0.315789	1.15715				H2AC6	0.0758133	0.4	0.14973	8.36e-06	0.109375	0.734927
6		RF	ADB	GB	SVM	KNN	Overall		Top 20 Features		Cytotoxic, Activated T Cell	0.25435	0.38617	0.131754	0.11179	0.105263	0.989328				PIGK	0.0111744	0	0.362967	0.00036132	0.34375	0.718253
	T Cell	0.866225	1	1	0.742857	0.6	4.20908		Amino Acid Metabolism		Monocyte	0.0875178	0.40125	0	0.00290131	0.421053	0.912722				ISG20	0.0241107	0	0.314695	0.00538812	0.296875	0.641069
	Amino Acid Metabolism	0.385481	1	0.556563	0.314286	0.914286	3.17062		Apoptosis		Anergic / Activated T cells	0.243996	0.19399	0	0	0.0526316	0.490618				LAP3	0.0372106	0.2	0.259769	1.03e-12	0.125	0.621979
	IFN	0.430543	0.5	0.311644	1	0.657143	2.89933		Classical Complement Pathway		pDC	0	0.150494	0	0.00616722	0.210526	0.367188				MANEA	0.0284048	0.2	0.157755	1.08e-06	0.234375	0.620536
	Fatty Acid Alpha Oxidation	0.255158	0.75	0.114196	0.714286	0.885714	2.71935		Cytotoxic, Activated T Cell			RF	LDA	GB	SVM	KNN	Overall		Top 10 Features		GBP5	0.0185028	0	0.130929	4.3e-11	0.375	0.524432
	Inflammatory_Neutrophil	1	0.25	0.770426	0.4	0.114286	2.53471		Dendritic Cell		T Cell	1	0.808034	1	0.789474	0.789474	4.38698		Amino Acid Metabolism		IFITM2	0.0414878	0	0.152223	0.00250653	0.28125	0.477468
	Classical Complement Pathway	0.0589292	0.5	0.00607434	0.914286	1	2.47929		Erythrocytes		Unfolded Protein	0.291032	1	0.377298	0.526316	0.526316	2.72096		Classical Complement Pathway		GSTK1	0.0315259	0.2	0.166573	7.02e-05	0.03125	0.429419
	Apoptosis	0.25668	0.5	0.0638243	0.857143	0.771429	2.44908		Fatty Acid Alpha Oxidation		Tactivated	0.792433	0.0221983	0.0800104	0.842105	0.842105	2.57885		Cytotoxic, Activated T Cell		GOLT1B	0	0.4	0	0.00466207	0.015625	0.420287
	Cytotoxic, Activated T Cell	0.260347	0.5	0.0325025	0.885714	0.514286	2.19285		Fatty Acid Beta Oxidation		Fatty Acid Alpha Oxidation	0.14055	0.41018	0.118196	0.947368	0.947368	2.56366		Fatty Acid Alpha Oxidation		H2BC21	0.15762	0	0.102638	0.00089717	0.140625	0.40178
	NK Cell	0.2168	0.75	0.0128042	0.257143	0.857143	2.09389		Glycolysis		Pentose Phosphate Signature	0.0576393	0.780701	0.0941265	0.578947	1	2.51141		Inflammatory_Neutrophil		ADD3	0.067517	0	0.24418	0.00052797	0.0625	0.374725
	Tactivated	0.525591	0.25	0.164799	0.685714	0.457143	2.08325		IFN		Amino Acid Metabolism	0.441225	0.656733	0.374788	0.631579	0.210526	2.31485		NLRP3 Inflammasome		GBP4	0.0778218	0.2	0.0621293	0.0283655	0	0.368317
	Fatty Acid Beta Oxidation	0.27205	0.75	0.361324	0.657143	0.0285714	2.06909		Inflammatory_Neutrophil		Inflammatory_Neutrophil	0.514627	0.821906	0.341804	0.105263	0.315789	2.09939		Pentose Phosphate Signature		H2BC5	0.0920997	0	0.0997644	7.1e-12	0.15625	0.348114
	NFkB Complex	0.136594	0.75	0.027042	0.342857	0.8	2.05649		NFkB Complex		Classical Complement Pathway	0.16979	0.325506	0.00156272	0.473684	0.894737	1.86528		T Cell		TNFRSF9	0.011142	0.2	0.0306309	3.91e-14	0.078125	0.319898
	Glycolysis	0.239317	0.25	0.0840047	0.628571	0.828571	2.03046		NK Cell		NLRP3 Inflammasome	0.209325	0	0.0738615	1	0.578947	1.86213		Tactivated			RF	ADB	LDA	GB	SVM	Overall		Top 20 Genes
	pDC	0.144676	0.75	0.206675	0.2	0.628571	1.92992		pDC		Cytotoxic, Activated T Cell	0.338316	0.244615	0.115842	0.736842	0.105263	1.54088		Unfolded Protein		CD28	1	0.166667	0.190376	1	0.609375	2.96642		ADD3
	Dendritic Cell	0.201519	0.25	0.160233	0.828571	0.342857	1.78318		Pentose Phosphate Signature		Glycolysis	0.199794	0.146787	0.0685676	0.684211	0.368421	1.46778				SSR1	0.0418311	0.166667	1	0.00022284	1	2.20872		CAST
	Plasma Cell	0.0984054	0.5	0.00014448	0.571429	0.571429	1.74141		Plasma Cell		IFN	0.225441	0.144745	0.235552	0	0.736842	1.34258				EIF2AK2	0.128631	0.166667	0.771219	0.0174932	0.875	1.95901		CCR3
	Erythrocytes	0.093811	0.5	0.0114421	0.8	0.314286	1.71954		T Cell		Plasma Cell	0.0208286	0.433766	0.031076	0.157895	0.684211	1.32778				MCEMP1	0.271995	1	0.181873	0.286682	0.203125	1.94367		CD177
	Pentose Phosphate Signature	0.19216	0.25	0.0788572	0.971429	0.171429	1.66387		Tactivated		MHC II	0.20917	0.22117	0.376283	0.210526	0.263158	1.28031				CD177	0.703207	0.166667	0.0848525	0	0.96875	1.92348		CD28
	Unfolded Protein	0.264925	0.25	0.176613	0.428571	0.485714	1.60582		Treg		LDG	0.0780866	0.249943	0.102973	0.368421	0.473684	1.27311				EOMES	0.583858	0.5	0.0995866	0.00247938	0.734375	1.9203		CREM
	Treg	0.345804	0.25	0.122184	0.485714	0.371429	1.57513		Unfolded Protein		Monocyte	0.485996	0.564064	0.0101326	0.0526316	0.157895	1.27072				SGK1	0.629336	0.166667	0.580976	0.00510161	0.40625	1.78833		DERL1
	MHC II	0.264141	0.5	0.293456	0.371429	0.142857	1.57188				Anergic / Activated T cells	0.148221	0.124796	0	0.315789	0.631579	1.22039				ERGIC2	0.0849032	0.166667	0.461172	2.9e-11	0.921875	1.63462		EIF2AK2
	TCA cycle	0.0799371	0	0.0707209	0.6	0.742857	1.49352				Dendritic Cell	0.0439186	0.125269	0.095026	0.894737	0.0526316	1.21158				ADD3	0.0947302	0	0.464984	0.00199329	0.953125	1.51483		EOMES
	Anergic / Activated T cells	0.280067	0	0	0.457143	0.685714	1.42292				Fatty Acid Beta Oxidation	0.405377	0.294242	0.237598	0.263158	0	1.20037				CAST	0.0177101	0.166667	0.575485	3.21e-12	0.75	1.50986		ERAP1
	Anti inflammation	0.125899	0.25	0.00325583	0.0857143	0.942857	1.40773				TCA cycle	0	0.182401	0.00295553	0.421053	0.421053	1.02746				OXCT1	0.614763	0.166667	0.3629	0.0797623	0.28125	1.50534		ERGIC2
	Proinflammatory IL-1 Family	0.160536	0	0.097946	0.171429	0.971429	1.40134														ERAP1	0.0460109	0	0.668096	6.17e-05	0.765625	1.47979		FKBP5
	Granulocyte	0.25223	0.25	0.0169962	0.542857	0.228571	1.29066														FKBP5	0.0539734	0.166667	0.452286	0.00057574	0.78125	1.45475		H2BC5
	LDG	0.108509	0.5	0.249003	0.0285714	0.257143	1.14323														OAT	0.0599937	0	0.354296	0	0.984375	1.39866		MCEMP1
	TNF	0.162881	0	0.00018814	0.514286	0.428571	1.10593														SP100	0.0380943	0	0.889147	0.00031061	0.46875	1.3963		NT5C3A
	Cell Cycle	0.0203534	0	0.0456394	0.942857	0.0571429	1.06599														CREM	0.0331118	0.166667	0.469839	0	0.6875	1.35712		OAT
	Oxidative Phosphorylation	0.111067	0.25	0.00162555	0.142857	0.542857	1.04841														NT5C3A	0.0906748	0.5	0.468031	0.018303	0.234375	1.31138		OXCT1
	NLRP3 Inflammasome	0.149111	0	0.0265055	0.114286	0.714286	1.00419														CCR3	0.16856	0.5	0.0555327	0.0342412	0.546875	1.30521		SGK1
	Monocyte	0.479541	0	0.00029958	0.0571429	0.4	0.936984														H2BC5	0.0877518	0.166667	0.159079	9.87e-05	0.890625	1.30422		SP100
	Alternative Complement Pathway	0.074205	0.25	0.0574739	0.285714	0.2	0.867393														DERL1	0.110659	0.166667	0.218964	0.101385	0.703125	1.3008		SSR1
	Platelets	0	0	0.00603732	0.771429	0	0.777466														HAAO	0.290721	0.166667	0.0583004	2.42e-05	0.71875	1.23446
	ROS Protection	0.182738	0	0.0666602	0.228571	0.285714	0.763684														GOLT1B	0.00391691	0.333333	0.033362	0.00481758	0.828125	1.20355
	CD40 Activated B Cell	0.0320889	0	0.149593	0	0.0857143	0.267396														PRPS2	0.0568693	0	0.779999	1.3e-11	0.34375	1.18062
7		LR	RF	LDA	GB	SVM	Overall		Top 20 Features												H2BC21	0.0842014	0.166667	0.0670665	2.66e-06	0.859375	1.17731
	T Cell	1	0.924995	0.853731	1	1	4.77873		Alternative Complement Pathway												TKTL1	0.202485	0.333333	0.192641	0.00215996	0.4375	1.16812
	Inflammatory_Neutrophil	0.53898	1	1	0.775163	0.257143	3.57129		Amino Acid Metabolism												DNAJC3	0.0403482	0.166667	0.0131763	0.00843079	0.9375	1.16612
	Unfolded Protein	0.714	0.269035	0.882861	0.0965138	0.771429	2.73384		Anergic / Activated T cells												MTPN	0.0269137	0.333333	0.523303	0.00202913	0.21875	1.10433
	Amino Acid Metabolism	0.816414	0.240581	0.789149	0.219777	0.457143	2.52306		CD40 Activated B Cell												H2AC6	0.0470128	0	0.148916	5.1e-07	0.90625	1.10218
	Cytotoxic, Activated T Cell	0.323028	0.323441	0.362884	0.0953572	0.971429	2.07614		Cell Cycle												CLEC4D	0.356146	0	0.0453306	0.00012058	0.65625	1.05785
	LDG	0.608346	0.0868289	0.263983	0.446594	0.657143	2.06289		Cytotoxic, Activated T Cell												GSTK1	0.0244367	0	0.151987	0	0.84375	1.02017
	Tactivated	0.299474	0.772212	0.0207261	0.2217	0.685714	1.99983		Fatty Acid Alpha Oxidation												GBP5	0.0220157	0	0.124533	0.00010402	0.8125	0.959152
	Monocyte	0.0658601	0.470571	0.375318	0.00616249	0.942857	1.86077		IFN												GBP4	0.0659897	0	0.0606784	0.0253576	0.796875	0.948901
	Treg	0.406421	0.610657	0.157835	0.160295	0.485714	1.82092		Inflammatory_Neutrophil												IFI44L	0.126364	0.166667	0.154549	0.00508624	0.484375	0.937041
	Pentose Phosphate Signature	0.588816	0.0878361	0.634158	0.125064	0.371429	1.8073		LDG												SAMD9	0.167821	0	0.37374	0	0.390625	0.932186
	MHC II	0.536389	0.256594	0.245441	0.121788	0.628571	1.78878		MHC II												ANXA1	0.0370492	0.166667	0.191825	7.84e-07	0.53125	0.926791
	IFN	0.530813	0.41934	0.164794	0.439281	0.2	1.75423		Monocyte												TRAM1	0.0164693	0	0.727926	0.00485145	0.171875	0.921122
	Anergic / Activated T cells	0.350777	0.24334	0.0900286	0.00253079	0.857143	1.54382		NFkB Complex												C3AR1	0.0626851	0	0.275461	0.00357467	0.578125	0.919846
	Cell Cycle	0.152393	0	0.342856	0	0.914286	1.40953		Pentose Phosphate Signature												ARG1	0.373914	0	0.033422	0.00169941	0.5	0.909035
	ROS Protection	0.312424	0.273097	0.354488	0.0681287	0.4	1.40814		Plasma Cell												HIF1A	0.13597	0.333333	0.427811	3.39e-10	0	0.897115
	Fatty Acid Alpha Oxidation	0.621111	0.23263	0.309184	0.175951	0.0285714	1.36745		ROS Protection												TRAM2	0.0256217	0.166667	0.0325759	0	0.671875	0.896739
	CD40 Activated B Cell	0.196084	0.0917659	0.417275	0.0640266	0.542857	1.31201		T Cell												SLFN5	0.0363659	0.166667	0.223528	0.00993558	0.453125	0.889621
	NFkB Complex	0.260892	0.0348634	0.0721558	0.109222	0.828571	1.3057		Tactivated												CANX	0.215658	0.166667	0.0690496	0.00027134	0.328125	0.779771
	Plasma Cell	0.465193	0.0625275	0.350601	0.0615846	0.285714	1.22562		Treg												RPE	0.0398465	0	0.362885	2.78e-10	0.375	0.777732
	Alternative Complement Pathway	0.254909	0.0600849	0.136305	0.00692395	0.714286	1.17251		Unfolded Protein												CFL1	0.105467	0	0.0106181	0.00133989	0.640625	0.75805
	Fatty Acid Beta Oxidation	0.0881095	0.194056	0.254937	0.24914	0.342857	1.1291														PGD	0.00986987	0	0.419784	0.00354762	0.265625	0.698827
	Anti inflammation	0.096458	0.0334433	0.112476	0.00081413	0.885714	1.12891														CD69	0.0402242	0	0.0270483	0.0009918	0.625	0.693264
	Glycolysis	0.236054	0.315232	0.0231657	0.213621	0.314286	1.10236														ANXA3	0.193775	0	0.327406	0.00312454	0.15625	0.680556
	TNF	0.0517782	0.269966	0.0631435	0.0249441	0.571429	0.981261														TNFRSF9	0.0574072	0	0.0447565	0.0018251	0.5625	0.666489
	Proinflammatory IL-1 Family	0.0278323	0.258161	0.195274	0.0494072	0.428571	0.959247														IL23R	0.117227	0.333333	0.0986261	0.017514	0.078125	0.644825
	pDC	0	0.0650581	0	0.0597231	0.8	0.924781														CD226	0.0343907	0	0.0153157	0	0.59375	0.643456
	Platelets	0.0251583	0.0234315	0.08896	0.0296181	0.742857	0.910025														PIGK	0.0401352	0	0.279432	0.00084109	0.3125	0.632908
	Apoptosis	0.0125616	0.199676	0.155609	0.0210333	0.514286	0.903165														SLC27A2	0.197731	0	0	0.00135175	0.421875	0.620958
	TCA cycle	0.050817	0.0971826	0.0758974	0.00096269	0.6	0.82486														CAPZA1	0.0601386	0	0.021414	0.0116344	0.515625	0.608812
	Erythrocytes	0.377341	0.0234723	0.163692	7.31e-05	0.171429	0.736007														CARD16	0.0765369	0.166667	0.110466	0.00025311	0.25	0.603923
	Oxidative Phosphorylation	0.258417	0.0125997	0.231551	0.0860341	0.114286	0.702887														MANEA	0.0277617	0.166667	0.156896	5.36e-05	0.1875	0.538878
	Granulocyte	0.0603696	0.331426	0.191981	0.00262099	0.0571429	0.64354														TFRC	0.0064997	0	0.442564	1.07e-11	0.046875	0.495938
	NK Cell	0.163645	0.164651	0.073999	0.00685411	0.228571	0.637721														LAP3	0.0271309	0	0.331464	3.57e-09	0.125	0.483595
	Dendritic Cell	0.280995	0.119509	0.075819	0.101724	0	0.578048														KCNA3	0.026903	0.166667	0.177821	0.00041637	0.109375	0.481182
	NLRP3 Inflammasome	0.0600866	0.161363	0.113497	0.0402348	0.142857	0.518039														MAN1A1	0.07093	0.166667	0.0772277	1.42e-07	0.140625	0.455449
	Classical Complement Pathway	0.0638547	0.0795166	0.0618936	0.0258914	0.0857143	0.316871														PSAT1	0	0	0.0915584	1.44e-10	0.359375	0.450933
8		LR	ADB	LDA	GB	SVM	Overall		Top 20 Features												ISG20	0.0191817	0	0.282759	0.00556809	0.09375	0.401259
	T Cell	1	0.6	0.807129	1	0.2	3.60713		Alternative Complement Pathway												SPTLC2	0.0035779	0	0.05942	0.00594327	0.296875	0.365816
	Inflammatory_Neutrophil	0.562151	0.4	1	0.471886	0.828571	3.26261		Amino Acid Metabolism												IKZF2	0.0798844	0	0.20929	0.00391289	0.03125	0.324337
	Amino Acid Metabolism	0.824423	0.4	0.713082	0.266948	0.885714	3.09017		Apoptosis												AASS	0.00557342	0.166667	0.0239364	0.00015548	0.0625	0.258832
	Unfolded Protein	0.777033	0.4	0.855412	0.213382	0.685714	2.93154		Classical Complement Pathway												IFITM2	0.0512692	0	0.135956	0.00259016	0.015625	0.20544
	MHC II	0.596847	1	0.263658	0.332831	0.142857	2.33619		Cytotoxic, Activated T Cell													RF	ADB	LDA	GB	SVM	Overall		Top 20 Genes
	IFN	0.542657	0.2	0.156818	0.178149	0.971429	2.04905		Fatty Acid Alpha Oxidation												CD28	1	0.25	0.253581	1	0.6875	3.19108		CD177
	Pentose Phosphate Signature	0.691942	0.6	0.645771	0.0535434	0	1.99126		Granulocyte												SGK1	0.689436	1	0.657922	0.00568032	0.328125	2.68116		CD28
	Fatty Acid Alpha Oxidation	0.582102	0.4	0.266507	0.186214	0.4	1.83482		IFN												MCEMP1	0.337024	1	0.186626	0.287219	0.28125	2.09212		CREM
	Plasma Cell	0.400929	0	0.375908	0.0286395	1	1.80548		Inflammatory_Neutrophil												EIF2AK2	0.114351	0	0.895523	0.0174698	0.765625	1.79297		EIF2AK2
	Cytotoxic, Activated T Cell	0.405883	0.8	0.388106	0.00105943	0.114286	1.70933		LDG												EOMES	0.602506	0.25	0.119369	0.00258539	0.796875	1.77134		EOMES
	Oxidative Phosphorylation	0.203078	0.4	0.25727	0.0395017	0.8	1.69985		MHC II												GOLT1B	0.00100539	0.75	0.0427626	0.00481793	0.9375	1.73609		ERAP1
	Treg	0.393078	0.4	0.183921	0.107092	0.485714	1.5698		Oxidative Phosphorylation												H2BC21	0.11732	0.5	0.131175	0.00056413	0.984375	1.73343		FKBP5
	Alternative Complement Pathway	0.271489	0.4	0.129577	0.027246	0.714286	1.5426		Pentose Phosphate Signature												SP100	0.0456202	0.25	0.830722	0.00030946	0.546875	1.67353		GBP5
	Apoptosis	0.0832494	0.2	0.165165	0.00820961	0.914286	1.37091		Plasma Cell												FKBP5	0.0477622	0.25	0.46992	0.00042773	0.890625	1.65873		GOLT1B
	LDG	0.643908	0.2	0.279065	0.190095	0.0571429	1.37021		Platelets												CREM	0.0449775	0.5	0.482341	2.64e-05	0.59375	1.6211		GSTK1
	ROS Protection	0.344202	0.4	0.322383	0.0466729	0.228571	1.34183		Proinflammatory IL-1 Family												HIF1A	0.0839979	1	0.480321	9.63e-12	0.015625	1.57994		H2BC21
	Granulocyte	0.19186	0	0.26095	0	0.857143	1.30995		ROS Protection												GBP5	0.0279127	0.5	0.0974835	0	0.921875	1.54727		HIF1A
	Classical Complement Pathway	0.0363779	0.2	0.116956	0.00077997	0.942857	1.29697		T Cell												SSR1	0.0528441	0	1	0.00033799	0.4375	1.49068		MCEMP1
	Proinflammatory IL-1 Family	0.0346612	0.2	0.198023	0.0186907	0.742857	1.19423		Treg												ERAP1	0.0371547	0	0.635292	1.17e-05	0.8125	1.48496		NT5C3A
	Platelets	0.091257	0.4	0.113451	0.00060177	0.571429	1.17674		Unfolded Protein												CD177	0.633334	0	0.0934975	6.48e-09	0.75	1.47683		OXCT1
	Anergic / Activated T cells	0.435497	0	0.163656	0.0188585	0.542857	1.16087														NT5C3A	0.0906152	0.5	0.403878	0.0180221	0.453125	1.46564		PGD
	Fatty Acid Beta Oxidation	0.200605	0.6	0.0510793	0.196504	0.0857143	1.1339														GSTK1	0.0378272	0.25	0.188333	0	0.96875	1.44491		PIGK
	CD40 Activated B Cell	0.23233	0	0.474563	0.0793456	0.342857	1.1291														OXCT1	0.571775	0	0.353372	0.0789184	0.40625	1.41031		SGK1
	Dendritic Cell	0.268385	0	0.085373	0.110488	0.657143	1.12139														PIGK	0.0330659	0	0.359529	0.00084115	1	1.39344		SP100
	NK Cell	0.203772	0.2	0.0845028	0.00253858	0.628571	1.11938														PGD	0.0581968	0.5	0.431013	0.00354787	0.390625	1.38338		SSR1
	TCA cycle	0.0738534	0	0.19092	0.00655379	0.771429	1.04276														MTPN	0.0258621	0.5	0.476063	0.0020293	0.359375	1.36333
	Tactivated	0.214115	0.2	0.139899	0.0488526	0.428571	1.03144														ERGIC2	0.129714	0	0.400741	0.00011068	0.828125	1.35869
	TNF	0.0695791	0.2	0.0496746	0.00347205	0.6	0.922726														ANXA3	0.212899	0.25	0.370168	0.00312459	0.515625	1.35182
	Cell Cycle	0.0857534	0	0.332699	0.0110539	0.457143	0.886649														ADD3	0.0760179	0	0.308246	0.00190577	0.953125	1.33929
	Erythrocytes	0.350371	0	0.156036	0.00020701	0.371429	0.878043														CCR3	0.176462	0.25	0.0247333	0.0343729	0.84375	1.32932
	pDC	0.011627	0.8	0.0208422	0.00805396	0.0285714	0.869095														CARD16	0.116478	0.5	0.129468	0.00025311	0.578125	1.32432
	NFkB Complex	0.172119	0.4	0.0459615	0.0234462	0.171429	0.812956														H2AC6	0.0708383	0.25	0.196222	3.27e-05	0.734375	1.25147
	Glycolysis	0.21899	0	0.0343935	0.173875	0.314286	0.741544														TKTL1	0.171519	0.25	0.225466	0.00218279	0.5625	1.21167
	Monocyte	0	0	0.436126	0.00947014	0.285714	0.73131														DERL1	0.123288	0	0.188126	0.101527	0.71875	1.13169
	Anti inflammation	0.147002	0	0.201441	0.0369972	0.257143	0.642583														GBP4	0.0590235	0	0.136535	0.0253536	0.90625	1.12716
	NLRP3 Inflammasome	0.023934	0	0	0.040565	0.514286	0.578785														PRPS2	0.0532225	0	0.696402	3.37e-13	0.375	1.12462
9		LR	RF	ADB	GB	SVM	Overall		Top 20 Features												SLFN5	0.0699671	0.25	0.160825	0.0100494	0.625	1.11584
	T Cell	1	1	1	1	0.485714	4.48571		Alternative Complement Pathway												CLEC4D	0.377396	0	0.0743881	7.75e-05	0.609375	1.06124
	Inflammatory_Neutrophil	0.582014	0.932237	0.166667	0.415243	0.628571	2.72473		Amino Acid Metabolism												HAAO	0.293274	0.25	0.0345686	0.00027197	0.46875	1.04686
	IFN	0.569632	0.403649	0.333333	0.379588	0.942857	2.62906		Anergic / Activated T cells												TRAM2	0.0286485	0.25	0.0416641	0	0.671875	0.992188
	Amino Acid Metabolism	0.869089	0.34861	0.5	0.389064	0.457143	2.56391		Cytotoxic, Activated T Cell												PSAT1	0.00186609	0	0.126299	0	0.859375	0.98754
	Tactivated	0.388416	0.900105	0	0.405538	0.685714	2.37977		Dendritic Cell												KCNA3	0.0305537	0.5	0.168565	0.00041638	0.265625	0.96516
	Fatty Acid Alpha Oxidation	0.636891	0.265875	0.5	0.220767	0.342857	1.96639		Fatty Acid Alpha Oxidation												CAST	0.016237	0.25	0.448358	0	0.25	0.964595
	MHC II	0.491704	0.296981	0.5	0.189505	0.4	1.87819		Fatty Acid Beta Oxidation												CAPZA1	0.0391376	0	0.00586105	0.01157	0.875	0.931569
	Oxidative Phosphorylation	0.288944	0.117686	0.333333	0.136952	1	1.87692		IFN												SAMD9	0.16829	0	0.27075	0	0.484375	0.923415
	Treg	0.485561	0.577156	0	0.0337663	0.771429	1.86791		Inflammatory_Neutrophil												ANXA1	0.0231457	0.25	0.109435	2.04e-08	0.53125	0.913831
	Pentose Phosphate Signature	0.728914	0.206262	0.333333	0.104261	0.371429	1.7442		LDG												TRAM1	0.0242858	0	0.672765	0.00455027	0.171875	0.873476
	Anergic / Activated T cells	0.351166	0.362767	0	0.00592491	0.971429	1.69129		MHC II												DNAJC3	0.0493759	0	0.0145021	0.00843136	0.78125	0.853559
	Unfolded Protein	0.681222	0.165691	0.166667	0.246889	0.428571	1.68904		Monocyte												C3AR1	0.0583126	0	0.289446	0.0029419	0.5	0.850701
	Fatty Acid Beta Oxidation	0.132894	0.207948	0.333333	0.145735	0.828571	1.64848		Oxidative Phosphorylation												CFL1	0.101889	0	0.0307929	0.00133998	0.703125	0.837147
	Cytotoxic, Activated T Cell	0.400281	0.338306	0.166667	0.178764	0.542857	1.62687		pDC												LAP3	0.0224117	0.25	0.243579	3.17e-09	0.296875	0.812866
	Monocyte	0.0692173	0.648727	0	0.033499	0.8	1.55144		Pentose Phosphate Signature												MANEA	0.0244277	0.25	0.193254	5.46e-05	0.34375	0.811486
	pDC	0.0507959	0.165818	0.666667	0.019433	0.571429	1.47414		Plasma Cell												MAN1A1	0.0505318	0.25	0.187827	6.89e-10	0.3125	0.800859
	Alternative Complement Pathway	0.141593	0.0272954	0.333333	0.0667498	0.857143	1.42611		T Cell												ARG1	0.3628	0.25	0.0235223	0.00186903	0.15625	0.794441
	LDG	0.722067	0.150256	0.333333	0.0682042	0.142857	1.41672		Tactivated												OAT	0.0602582	0	0.276266	0	0.421875	0.7584
	Plasma Cell	0.538557	0.203109	0.333333	0.0734494	0.257143	1.40559		Treg												CD69	0.0201785	0	0.0510522	0.00099183	0.640625	0.712848
	Dendritic Cell	0.272979	0.14428	0	0.0598594	0.914286	1.3914		Unfolded Protein												CD226	0.0181242	0	0.0192194	0	0.65625	0.693594
	CD40 Activated B Cell	0.221182	0.192302	0	0.0888189	0.714286	1.21659														RPE	0.0132535	0.25	0.295019	0	0.125	0.683273
	Erythrocytes	0.360441	0.129631	0	0	0.657143	1.14722														ISG20	0.0234765	0	0.343353	0.00556824	0.21875	0.591148
	Cell Cycle	0.134426	0	0	0.00068641	0.885714	1.02083														TFRC	0	0	0.427055	5.54e-12	0.046875	0.47393
	TNF	0.0102753	0.216488	0.166667	0.00071631	0.6	0.994146														IL23R	0.131056	0	0.126066	0.0175152	0.1875	0.462136
	Classical Complement Pathway	0.0222758	0.141683	0.5	0.00506378	0.314286	0.983308														CANX	0.191325	0	0.0434332	0.0001561	0.203125	0.438039
	NFkB Complex	0.38431	0.133867	0.333333	0.0584817	0.0571429	0.967135														SLC27A2	0.177913	0	0.00074955	0.00140886	0.234375	0.414447
	TCA cycle	0.0526853	0.0652272	0	1.31e-05	0.742857	0.860783														IKZF2	0.0597168	0	0.197414	0.00391264	0.140625	0.401669
	Granulocyte	0.104838	0.217591	0	0.00048403	0.514286	0.837198														IFITM2	0.0443837	0	0.208105	0.00259034	0.109375	0.364454
	Apoptosis	0	0.252478	0.5	0.0803493	0	0.832827														IFI44L	0.0729294	0	0.22661	0.00501317	0.03125	0.335803
	Glycolysis	0.202613	0.267703	0.166667	0.0458848	0.114286	0.797152														SPTLC2	0.00136234	0	0.122858	0.00594368	0.09375	0.223914
	Proinflammatory IL-1 Family	0.0473824	0.279542	0	0.113268	0.285714	0.725907														H2BC5	0.094318	0	0.124135	4.09e-11	0	0.218453
	NK Cell	0.103996	0.191929	0.166667	0.00442035	0.2	0.667013														TNFRSF9	0.0565398	0	0	0.00182516	0.078125	0.13649
	ROS Protection	0.256275	0.150081	0.166667	0.0159943	0.0285714	0.617588														AASS	0.0162134	0	0.0451426	0.00019869	0.0625	0.124055
	NLRP3 Inflammasome	0.035548	0.0985419	0.166667	0.0546773	0.228571	0.584005															RF	ADB	LDA	GB	SVM	Overall		Top 20 Genes
	Anti inflammation	0.0882047	0.113995	0.166667	0.00077982	0.0857143	0.45536														CD28	1	0.4	0.211775	1	0.6875	3.29928		ARG1
	Platelets	0.0177538	0.0793656	0	0.0360087	0.171429	0.304557														SGK1	0.655593	0.8	0.645382	0.00359776	0.609375	2.71395		CAST
10		LR	RF	GB	SVM	KNN	Overall		Top 20 Features												MCEMP1	0.319011	1	0.187676	0.292098	0.875	2.67379		CCR3
	Inflammatory_Neutrophil	0.571466	1	1	0.228571	0.771429	3.57147		Amino Acid Metabolism												EIF2AK2	0.080753	0	0.831746	0.014355	0.921875	1.84873		CD28
	T Cell	1	0.825048	0.816388	0.0285714	0.542857	3.21286		Anergic / Activated T cells												OXCT1	0.501396	0.4	0.432608	0.0415912	0.46875	1.84435		CD69
	Anergic / Activated T cells	0.413034	0.258105	0.00142222	0.857143	1	2.5297		Classical Complement Pathway												SP100	0.0512898	0.2	0.965591	1.75e-07	0.5625	1.77938		CREM
	IFN	0.588264	0.509279	0.115393	0.4	0.828571	2.44151		Cytotoxic, Activated T Cell												CAST	0.0145829	0.2	0.558455	0	0.984375	1.75741		DERL1
	Fatty Acid Beta Oxidation	0.148519	0.339528	0.706694	0.914286	0.171429	2.28046		Dendritic Cell												SLFN5	0.114146	0.6	0.201695	0.00279015	0.796875	1.71551		EIF2AK2
	Fatty Acid Alpha Oxidation	0.708349	0.348243	0.173044	0.114286	0.885714	2.22964		Fatty Acid Alpha Oxidation												HIF1A	0.0797831	0.4	0.431448	5.26e-08	0.75	1.66123		EOMES
	Amino Acid Metabolism	0.839812	0.204058	0.236082	0.0857143	0.857143	2.22281		Fatty Acid Beta Oxidation												EOMES	0.593545	0	0.0908264	0.00277008	0.9375	1.62464		ERAP1
	Tactivated	0.29865	0.692932	0.0825864	0.371429	0.457143	1.90274		Glycolysis												ARG1	0.405559	0.2	0.0326948	0.00165306	0.96875	1.60866		FKBP5
	MHC II	0.473673	0.341914	0.121038	0.742857	0.142857	1.82234		IFN												CCR3	0.274113	0.6	0.0500921	0.0353209	0.59375	1.55328		HAAO
	Unfolded Protein	0.655147	0.234368	0.0584894	0.428571	0.428571	1.80515		Inflammatory_Neutrophil												PGD	0.0636481	0.2	0.42357	0.00309488	0.859375	1.54969		HIF1A
	NLRP3 Inflammasome	0.0183123	0.0701707	0.0971347	0.971429	0.628571	1.78562		LDG												FKBP5	0.0375963	0	0.469081	0.00049639	1	1.50717		IFI44L
	Cytotoxic, Activated T Cell	0.359698	0.206191	0.0471486	0.828571	0.228571	1.67018		MHC II												ERAP1	0.0522742	0	0.638133	0.00020889	0.703125	1.39374		MCEMP1
	TCA cycle	0.0395878	0.0744818	0.179389	0.771429	0.6	1.66489		Monocyte												HAAO	0.295664	0.2	0.0205105	6.47e-12	0.8125	1.32867		OXCT1
	Pentose Phosphate Signature	0.708004	0.138346	0.0421135	0.0571429	0.714286	1.65989		NLRP3 Inflammasome												DERL1	0.0955753	0	0.224056	0.102978	0.890625	1.31323		PGD
	Classical Complement Pathway	0.0435124	0.0564188	0.00212353	0.628571	0.914286	1.64491		Pentose Phosphate Signature												CREM	0.0477762	0	0.448897	0	0.78125	1.27792		SGK1
	Dendritic Cell	0.345967	0.168582	0.178608	0.885714	0.0571429	1.63602		Plasma Cell												IFI44L	0.12733	0.2	0.204702	0.00776504	0.734375	1.27417		SLFN5
	Plasma Cell	0.480643	0.120238	0.00854157	0.571429	0.4	1.58085		T Cell												CD69	0.0422235	0.4	0.0400039	7.57e-09	0.765625	1.24785		SP100
	Glycolysis	0.282502	0.203744	0.0345789	0.942857	0.114286	1.57797		Tactivated												CD177	0.433169	0	0.0913468	1.27e-05	0.640625	1.16515
	Monocyte	0.0238383	0.55741	0.00932757	0.657143	0.314286	1.562		TCA cycle												SSR1	0.0576664	0	1	0.00042685	0.09375	1.15184
	LDG	0.670395	0.00553889	0.0397269	0.8	0	1.51566		Unfolded Protein												MTPN	0.0297975	0.2	0.506454	0.00203488	0.375	1.11329
	ROS Protection	0.289603	0.21588	0.00804749	0.257143	0.742857	1.51353														TFRC	0.0170117	0	0.426202	1.6e-12	0.625	1.06821
	Treg	0.362581	0.357101	0.0154796	0.485714	0.285714	1.50659														H2BC5	0.101273	0	0.132305	0.00062555	0.828125	1.06233
	Erythrocytes	0.442576	0.164231	0.0116585	0.142857	0.685714	1.44704														CANX	0.140179	0	0.0762969	0.00062441	0.84375	1.06085
	Granulocyte	0.138799	0.102096	0.00160886	0.542857	0.657143	1.4425														SAMD9	0.174841	0	0.332144	0.00058431	0.546875	1.05444
	NK Cell	0.202083	0.141367	0.0055676	0.514286	0.571429	1.43473														CAPZA1	0.049347	0	0.0380477	0.0114146	0.953125	1.05193
	Cell Cycle	0.139617	0	0.00313933	0.314286	0.942857	1.3999														OAT	0.00636406	0.2	0.321903	0	0.484375	1.01264
	Proinflammatory IL-1 Family	0.115524	0.177117	0.0339469	0.685714	0.371429	1.38373														DNAJC3	0.0387602	0	0.0376705	0.0082009	0.90625	0.990882
	Platelets	0.0201208	0.0158009	0	0.285714	0.971429	1.29306														ANXA3	0.256515	0.2	0.357641	0.00303916	0.15625	0.973445
	NFkB Complex	0.200474	0.230957	0.0397257	0	0.8	1.27116														ERGIC2	0.12955	0	0.422306	5.83e-07	0.390625	0.942482
	Apoptosis	0.0145745	0.160962	0.0144173	0.714286	0.342857	1.2471														NT5C3A	0.0817959	0.2	0.446464	0.00955961	0.203125	0.940945
	Anti inflammation	0.0132096	0.203504	0.000978233	1	0.0285714	1.24626														CD226	0.0412259	0.2	0.0373863	4.76e-09	0.65625	0.934862
	TNF	0.000673991	0.120647	0.00374392	0.6	0.514286	1.23935														GOLT1B	0.00065663	0.6	0.0319835	0.00468623	0.28125	0.918576
	Oxidative Phosphorylation	0.24787	0.0334762	0.0305318	0.2	0.485714	0.997593														ANXA1	0.0290238	0.2	0.169977	0.00024084	0.515625	0.914866
	Alternative Complement Pathway	0.177442	0.0294502	0.00198821	0.457143	0.2	0.866024														TRAM1	0.0205097	0	0.710621	0.00451079	0.171875	0.907517
	CD40 Activated B Cell	0.16908	0.0618908	0.0574574	0.342857	0.0857143	0.716999														CARD16	0.115082	0.2	0.160216	2.14e-09	0.421875	0.897173
	pDC	0	0.113494	0.00647821	0.171429	0.257143	0.548543														ADD3	0.0820511	0	0.310373	0.00051481	0.5	0.892938
																					IKZF2	0.11627	0	0.191595	0.00401475	0.578125	0.890005
																					SLC27A2	0.221828	0.2	0.00283501	0.0013024	0.4375	0.863465
																					PRPS2	0.0545043	0	0.758116	0	0.046875	0.859495
																					ISG20	0.0132326	0	0.289077	0.00541608	0.53125	0.838976
																					CLEC4D	0.366527	0	0.0541328	3.63e-05	0.40625	0.826947
																					PIGK	0.0292578	0	0.343089	0.0003819	0.453125	0.825854
																					IL23R	0.139857	0.2	0.108242	0.0177318	0.359375	0.825206
																					CFL1	0.0838568	0	0.0122781	0.00169177	0.71875	0.816577
																					TRAM2	0.0235613	0	0.0417556	5.87e-13	0.671875	0.737192
																					GSTK1	0.0639423	0.2	0.181894	7.13e-07	0.265625	0.711462
																					KCNA3	0.0174003	0.2	0.142749	0	0.3125	0.672649
																					MANEA	0.0261479	0.2	0.190798	0.00030131	0.25	0.667247
																					C3AR1	0.0545815	0	0.277011	0.00449849	0.328125	0.664216
																					IFITM2	0.0563809	0.2	0.152144	0.00251952	0.1875	0.598544
																					H2BC21	0.11515	0.2	0.0861811	0.00051053	0.109375	0.511216
																					LAP3	0.0213678	0.2	0.264875	7.02e-11	0	0.486243
																					RPE	0.0162022	0	0.328503	2.38e-12	0.125	0.469706
																					H2AC6	0.0762126	0	0.17353	2.36e-08	0.21875	0.468493
																					PSAT1	0.00621855	0	0.107349	0.00033154	0.34375	0.45765
																					GBP5	0.0353851	0	0.115415	1.43e-09	0.296875	0.447675
																					SPTLC2	0	0.2	0	0.00578122	0.234375	0.440156
																					TKTL1	0.183692	0	0.207268	0.00416886	0.03125	0.426378
																					MAN1A1	0.0574937	0.2	0.152134	0	0.015625	0.425252
																					AASS	0.0197246	0.2	0.0372113	0.00019638	0.0625	0.319632
																					GBP4	0.0242548	0	0.0935759	0.0296097	0.140625	0.288065
																					TNFRSF9	0.046642	0	0.0268514	1.06e-08	0.078125	0.151618
																						RF	ADB	LDA	GB	SVM	Overall		Top 20 Genes
																					CD28	1	0.4	0.143581	1	0.765625	3.30921		ADD3
																					SGK1	0.562874	0.4	0.587665	0.00577906	0.625	2.18132		ANXA3
																					SSR1	0.0421108	0	1	9.03e-05	1	2.0422		CARD16
																					EOMES	0.525333	0.4	0.109406	0.00265475	0.9375	1.97489		CAST
																					MCEMP1	0.32973	1	0.171746	0.284227	0.03125	1.81695		CD177
																					CAST	0.0110317	0.6	0.54643	0	0.59375	1.75121		CD28
																					FKBP5	0.00500734	0.4	0.399816	0.00070032	0.90625	1.71177		CLEC4D
																					PRPS2	0.0452936	0	0.691876	2.58e-09	0.96875	1.70592		CREM
																					NT5C3A	0.0801	0.4	0.510904	0.0112576	0.515625	1.51789		EOMES
																					CLEC4D	0.380179	0.2	0.0829897	2.61e-05	0.828125	1.49132		ERGIC2
																					CREM	0.0433359	0.2	0.577526	0	0.65625	1.47711		FKBP5
																					OXCT1	0.568981	0.4	0.201346	0.0401424	0.25	1.46047		MCEMP1
																					CD177	0.627038	0	0.0734217	2.9e-05	0.71875	1.41924		MTPN
																					MTPN	0.0449617	0.2	0.464395	0.00482368	0.703125	1.41731		NT5C3A
																					CARD16	0.127572	0.2	0.0922979	5.74e-09	0.984375	1.40425		OXCT1
																					ERGIC2	0.0804074	0	0.394627	0.00010385	0.921875	1.39701		PRPS2
																					RPE	0.0228132	0	0.362515	1.12e-10	0.953125	1.33845		RPE
																					ANXA3	0.295794	0.4	0.318025	0.00300522	0.3125	1.32932		SGK1
																					ADD3	0.0979488	0.2	0.278321	2.99e-05	0.75	1.3263		SP100
																					SP100	0.0523125	0.2	0.849863	3.49e-10	0.203125	1.3053		SSR1
																					HIF1A	0.0718663	0.4	0.449093	1.41e-07	0.375	1.29596
																					H2BC21	0.127573	0.6	0.126298	0.00044519	0.4375	1.29182
																					CCR3	0.153557	0.4	0.0679879	0.0268776	0.640625	1.28905
																					H2BC5	0.0997552	0.6	0.102095	0.00012124	0.46875	1.27072
																					PIGK	0.0335346	0	0.363115	0	0.84375	1.2404
																					SAMD9	0.145024	0	0.393409	0.00034656	0.6875	1.22628
																					EIF2AK2	0.115254	0	0.811929	0.0145478	0.265625	1.20736
																					MANEA	0.0232998	0.2	0.158155	5.87e-07	0.8125	1.19396
																					ARG1	0.248351	0	0	0.00163457	0.890625	1.14061
																					ERAP1	0.0536286	0.2	0.73951	0.00022601	0.140625	1.13399
																					MAN1A1	0.102666	0.4	0.136669	7.75e-08	0.453125	1.09246
																					SLC27A2	0.159381	0	0.0318807	0.00128758	0.875	1.06755
																					LAP3	0.0278311	0.2	0.33848	0.00103647	0.484375	1.05172
																					GBP4	0.0456823	0	0.0550398	0.0282372	0.859375	0.988334
																					OAT	0.0717946	0	0.323521	0	0.578125	0.97344
																					PGD	0.0324294	0.2	0.423435	0.00307313	0.28125	0.940188
																					ISG20	0.00814663	0	0.303359	0.00558435	0.5625	0.87959
																					CD69	0.0541631	0	0.0365548	1.11e-05	0.78125	0.871979
																					CFL1	0.0344035	0	0.0193781	0.00184751	0.796875	0.852504
																					IFI44L	0.0726353	0	0.151615	0.00487745	0.609375	0.838503
																					TFRC	0.012811	0	0.44847	4.29e-12	0.34375	0.805031
																					IL23R	0.105715	0	0.110746	0.0186927	0.546875	0.782029
																					CD226	0.0271108	0	0.0105181	1.28e-08	0.734375	0.772004
																					TRAM2	0.0253567	0	0.0519224	1.09e-08	0.671875	0.749154
																					GOLT1B	0.0211438	0.4	0.108544	0.00463379	0.1875	0.721822
																					GBP5	0.0267217	0	0.161545	0.00012697	0.53125	0.719644
																					C3AR1	0.0551712	0	0.295645	0.00310638	0.359375	0.713297
																					CANX	0.197162	0	0.110672	3.3e-06	0.390625	0.698462
																					DERL1	0.0945305	0	0.182465	0.105384	0.296875	0.679254
																					PSAT1	0	0.2	0.128431	0.00032783	0.328125	0.656884
																					TKTL1	0.176729	0.2	0.21738	0.00157696	0.046875	0.64256
																					TRAM1	0.0175644	0	0.42801	0.00447977	0.171875	0.621929
																					AASS	0.0310437	0	0.0435403	5.54e-05	0.5	0.574639
																					CAPZA1	0.0353485	0	0.112187	0.0111666	0.40625	0.564952
																					HAAO	0.26115	0	0.0212953	0.00021262	0.234375	0.517032
																					DNAJC3	0.0312394	0	0.0439864	0.00810913	0.421875	0.50521
																					IKZF2	0.116004	0	0.20818	0.00376332	0.125	0.452948
																					SLFN5	0.0364377	0.2	0.1548	0.00502674	0	0.396264
																					SPTLC2	0.00330023	0.2	0.158068	0.00602479	0.015625	0.383018
																					ANXA1	0.0310699	0	0.116947	0	0.21875	0.366767
																					GSTK1	0.020519	0	0.144309	1.28e-10	0.15625	0.321078
																					KCNA3	0.0475914	0	0.125835	4.7e-09	0.109375	0.282802
																					H2AC6	0.057127	0	0.0806093	0	0.09375	0.231486
																					IFITM2	0.00690886	0	0.149595	0.00249132	0.0625	0.221495
																					TNFRSF9	0.0646602	0	0.0600277	0	0.078125	0.202813
																						RF	ADB	LDA	GB	SVM	Overall		Top 20 Genes
																					CD28	1	0.5	0.194304	1	0.53125	3.22555		ANXA3
																					SGK1	0.616329	0.75	0.651267	0.00596867	0.421875	2.44544		CARD16
																					CARD16	0.165693	0.75	0.133157	0.00025291	0.828125	1.87723		CAST
																					MCEMP1	0.226167	1	0.20924	0.28598	0.109375	1.83076		CCR3
																					PRPS2	0.0561641	0	0.75412	0	1	1.81028		CD28
																					HIF1A	0.0830716	0.25	0.47212	1.1e-06	0.9375	1.74269		CREM
																					EOMES	0.516535	0.25	0.129552	0.00247745	0.84375	1.74231		DERL1
																					CCR3	0.131389	0.5	0.0749613	0.0325216	0.96875	1.70762		EIF2AK2
																					FKBP5	0.0483387	0.5	0.437126	0.00042739	0.703125	1.68902		EOMES
																					DERL1	0.0850147	0.5	0.208338	0.101548	0.78125	1.67615		FKBP5
																					SSR1	0.0381074	0	1	0.00013334	0.546875	1.58512		H2BC21
																					IFI44L	0.174801	0.25	0.171503	0.00500918	0.921875	1.52319		HIF1A
																					H2BC21	0.101518	0.5	0.0972651	7.34e-05	0.796875	1.49573		IFI44L
																					CAST	0.0195014	0.5	0.635199	2.68e-05	0.28125	1.43598		IKZF2
																					SP100	0.0439541	0	0.895304	0.00030927	0.484375	1.42394		MAN1A1
																					CREM	0.0318358	0	0.603803	2.64e-05	0.75	1.38566		MCEMP1
																					ANXA3	0.167437	0	0.349487	0.0031221	0.859375	1.37942		PRPS2
																					EIF2AK2	0.0796767	0	0.830226	0.0175889	0.390625	1.31812		SGK1
																					IKZF2	0.0946173	0.25	0.208158	0.00399054	0.71875	1.27552		SP100
																					MAN1A1	0.0532388	1	0.182085	0	0.03125	1.26657		SSR1
																					TRAM2	0.0232881	0.5	0.0371741	1.23e-11	0.671875	1.23234
																					CD226	0.0381505	0.5	0.00783708	9.98e-08	0.65625	1.20224
																					OXCT1	0.568335	0	0.29003	0.0796798	0.234375	1.17242
																					MTPN	0.0243482	0.5	0.497528	0.00202767	0.125	1.1489
																					ADD3	0.0510875	0.25	0.332175	0.00205923	0.5	1.13532
																					IFITM2	0.0447342	0	0.152195	0.00258831	0.90625	1.10577
																					CFL1	0.137167	0	0.0103864	0.00149403	0.953125	1.10217
																					H2BC5	0.116498	0.25	0.103967	5.86e-05	0.609375	1.0799
																					IL23R	0.108043	0.25	0.109104	0.0175022	0.59375	1.0784
																					GSTK1	0.0278341	0	0.170598	0	0.875	1.07343
																					HAAO	0.193973	0	0.0513691	0.00027177	0.8125	1.05811
																					C3AR1	0.0584886	0.25	0.29764	0.00342001	0.4375	1.04705
																					SPTLC2	0.00265515	0	0.0327342	0.00593895	0.984375	1.0257
																					PIGK	0.0211651	0	0.414464	0.00084056	0.578125	1.01459
																					NT5C3A	0.0763468	0.25	0.494656	0.0182997	0.140625	0.979928
																					RPE	0.0238323	0.25	0.326034	8.7e-10	0.375	0.974866
																					PGD	0.00645911	0.25	0.44678	0.00354504	0.265625	0.972409
																					H2AC6	0.0577637	0	0.138283	3.27e-05	0.765625	0.961705
																					TKTL1	0.152361	0	0.232899	0.00239724	0.5625	0.950156
																					SLC27A2	0.218551	0.25	0.0193091	0.00148255	0.453125	0.942468
																					SAMD9	0.14897	0	0.381531	0	0.40625	0.936751
																					CD69	0.0115689	0.25	0.0173209	0.00099134	0.640625	0.920506
																					ERAP1	0.0182569	0	0.684651	5.46e-05	0.203125	0.906087
																					GOLT1B	0	0	0	0.00481408	0.890625	0.895439
																					TRAM1	0.0167064	0	0.652618	0.00462777	0.171875	0.845828
																					GBP4	0.0666516	0	0.112066	0.0252372	0.625	0.828955
																					GBP5	0.0248124	0	0.114143	3e-08	0.6875	0.826455
																					DNAJC3	0.0407185	0	0.0169736	0.00842471	0.734375	0.800492
																					KCNA3	0.0576815	0.25	0.168605	0.00041605	0.296875	0.773577
																					TFRC	0.00479785	0	0.452192	7.05e-10	0.3125	0.76949
																					CLEC4D	0.317066	0	0.0726716	0.00013642	0.328125	0.717999
																					CD177	0.535035	0	0.0944672	7.39e-07	0.0625	0.692003
																					SLFN5	0.0390908	0	0.164229	0.0101477	0.46875	0.682218
																					LAP3	0.0375177	0.25	0.304686	4.39e-09	0.015625	0.607829
																					ARG1	0.400148	0	0.0170918	0.00169866	0.15625	0.575189
																					OAT	0.0524618	0	0.332731	0	0.1875	0.572692
																					CANX	0.200985	0	0.00785398	0.00028371	0.359375	0.568498
																					ISG20	0.0218252	0.25	0.28522	0.00556381	0	0.562609
																					AASS	0.0105436	0	0.0300688	0.00020587	0.515625	0.556443
																					ERGIC2	0.0790873	0	0.393999	0.00011054	0.046875	0.520071
																					MANEA	0.0286288	0.25	0.140894	1.12e-05	0.09375	0.513284
																					PSAT1	0.00858999	0	0.123965	4.5e-10	0.34375	0.476305
																					TNFRSF9	0.0500407	0.25	0.0526955	0.00187808	0.078125	0.432739
																					ANXA1	0.0419212	0	0.145655	2.46e-06	0.21875	0.406328
																					CAPZA1	0.0351533	0	0.0699274	0.0116198	0.25	0.366701
																						LR	ADB	LDA	GB	SVM	Overall		Top 20 Genes
																					MCEMP1	1	1	0.196512	0.287035	0.34375	2.8273		CCR3
																					CD28	0.291183	0.25	0.176089	1	0.640625	2.3579		CD177
																					MTPN	0.0766799	0.75	0.491012	0.00202969	1	2.31972		CD28
																					SSR1	0.33394	0.25	1	0.00027566	0.625	2.20922		DERL1
																					EIF2AK2	0.557174	0	0.79571	0.0174893	0.78125	2.15162		EIF2AK2
																					FKBP5	0.619131	0	0.446089	0.00057589	0.890625	1.95642		EOMES
																					ERAP1	0.202531	0.25	0.605412	6.37e-05	0.828125	1.88613		ERAP1
																					DERL1	0.232709	0.5	0.219212	0.101413	0.796875	1.85021		FKBP5
																					SLFN5	0.347236	0.5	0.196131	0.00970992	0.75	1.80308		GOLT1B
																					SGK1	0.590906	0.5	0.612676	0.00464602	0.078125	1.78635		GSTK1
																					GSTK1	0.638546	0	0.177539	0	0.96875	1.78483		H2BC21
																					HIF1A	0.562108	0.75	0.430369	0	0.015625	1.7581		HIF1A
																					H2BC21	0.41143	0.25	0.10688	1.44e-06	0.984375	1.75269		MAN1A1
																					CCR3	0.0472898	0.75	0.0543914	0.0347667	0.84375	1.7302		MCEMP1
																					EOMES	0.537999	0.25	0.0924776	0.00253053	0.8125	1.69551		MTPN
																					GOLT1B	0.209194	0.5	0.0061407	0.0048189	0.9375	1.65765		SGK1
																					SP100	0.214396	0.25	0.917045	0.00030953	0.234375	1.61613		SLFN5
																					CD177	0.584432	0.25	0.0902445	0	0.6875	1.61218		SP100
																					MAN1A1	0.400967	0.75	0.157006	1.68e-07	0.296875	1.60485		SSR1
																					TKTL1	0.720003	0.25	0.187983	0.00218243	0.4375	1.59767		TKTL1
																					ANXA3	0.278083	0	0.332589	0.00312521	0.953125	1.56692
																					ERGIC2	0.231069	0	0.380512	2.89e-11	0.875	1.48658
																					CREM	0.219655	0	0.463233	0	0.71875	1.40164
																					H2AC6	0.216898	0.25	0.173079	5.07e-07	0.734375	1.37435
																					CARD16	0.105827	0.5	0.180143	0.00025317	0.578125	1.36435
																					C3AR1	0.531485	0	0.266549	0.00349691	0.515625	1.31716
																					HAAO	0.287235	0.5	0.0171524	3.51e-09	0.46875	1.27314
																					CAST	0.244793	0.25	0.545841	0	0.21875	1.25938
																					PGD	0.423206	0	0.423317	0.00354859	0.390625	1.2407
																					SLC27A2	0.418773	0.25	0	0.00140144	0.546875	1.21705
																					PRPS2	0.0508933	0	0.742167	0	0.421875	1.21494
																					NT5C3A	0.114375	0.25	0.46218	0.018308	0.359375	1.20424
																					OXCT1	0.192708	0	0.397535	0.0797849	0.453125	1.12315
																					GBP5	0.0841689	0	0.0936839	0.00010405	0.921875	1.09983
																					LAP3	0.075226	0.5	0.23491	3.17e-09	0.28125	1.09139
																					GBP4	0.0406103	0	0.0880262	0.0253566	0.90625	1.06024
																					TRAM1	0.222281	0	0.651549	0.00475199	0.171875	1.05046
																					ARG1	0.260855	0.25	0.0294433	0.00169986	0.5	1.042
																					CAPZA1	0.142092	0	0.0278273	0.0115693	0.859375	1.04086
																					CFL1	0.192091	0.25	0.00056158	0.00134026	0.59375	1.03774
																					CD226	0.323152	0	0.0448263	3.17e-08	0.65625	1.02423
																					SPTLC2	0.00227952	0.5	0.0248296	0.0059449	0.484375	1.01743
																					TNFRSF9	0.377325	0	0.0254712	0.0018256	0.5625	0.967122
																					ANXA1	0.379488	0.25	0.156236	7.09e-10	0.15625	0.941974
																					IL23R	0.428034	0.25	0.0953011	0.0175188	0.140625	0.931479
																					OAT	0.0362506	0.25	0.255026	0	0.375	0.916276
																					TFRC	0.338791	0	0.435048	1.06e-11	0.125	0.898839
																					IFI44L	0.630347	0	0.197364	0.00508764	0.03125	0.864049
																					CD69	0.19266	0	0.03336	0.00099203	0.609375	0.836387
																					ADD3	0.0827001	0	0.212542	0.00209471	0.53125	0.828587
																					TRAM2	0.108317	0	0.0468096	3.91e-12	0.671875	0.827002
																					DNAJC3	0.036085	0	0.0104755	0.00843312	0.765625	0.820619
																					CLEC4D	0.0087945	0	0.0636316	0.00032635	0.703125	0.775877
																					PIGK	0.0065093	0	0.351842	0.00084133	0.40625	0.765442
																					SAMD9	0.208231	0	0.329522	0	0.203125	0.740877
																					CANX	0.0480325	0.25	0.0622161	0.00018674	0.328125	0.68856
																					RPE	0.105573	0	0.318097	1.17e-06	0.25	0.673672
																					KCNA3	0.267883	0	0.131107	0.00041648	0.265625	0.665031
																					H2BC5	0.545464	0	0.10703	0.00017512	0	0.652669
																					MANEA	0.083594	0	0.181096	1.99e-05	0.3125	0.57721
																					ISG20	0.0676485	0	0.30025	0.00556962	0.1875	0.560968
																					IKZF2	0.0375893	0	0.185897	0.00391344	0.109375	0.336775
																					IFITM2	0	0	0.135415	0.00259085	0.09375	0.231756
																					AASS	0.126498	0	0.0402612	0.00015553	0.0625	0.229415
																					PSAT1	0.0457283	0	0.109472	1.43e-10	0.046875	0.202075
																						RF	ADB	LDA	GB	SVM	Overall		Top 20 Genes
																					CD28	1	0.2	0.172248	1	0.828125	3.20037		ANXA3
																					MCEMP1	0.322537	1	0.192711	0.284651	0.875	2.6749		CARD16
																					EOMES	0.552391	0.4	0.117041	0.00248036	0.890625	1.96254		CAST
																					SGK1	0.584755	0.6	0.60724	0.00450209	0	1.7965		CD177
																					SP100	0.0536945	0.2	0.920356	0	0.609375	1.78343		CD28
																					NT5C3A	0.0679944	0.2	0.489304	0.0114328	1	1.76873		EIF2AK2
																					CAST	0.026685	0.4	0.611284	0	0.703125	1.74109		EOMES
																					ERAP1	0.031426	0	0.667484	1.09e-05	0.96875	1.66767		ERAP1
																					MTPN	0.0271276	0.4	0.485518	0.00752264	0.71875	1.63892		FKBP5
																					CD177	0.52295	0	0.0908854	0	0.9375	1.55134		H2BC21
																					HAAO	0.164135	0.4	0.0324907	0	0.921875	1.5185		HAAO
																					ANXA3	0.19105	0	0.338235	0.0030222	0.953125	1.48543		HIF1A
																					H2BC21	0.124477	0.4	0.119142	0.00131785	0.734375	1.37931		LAP3
																					EIF2AK2	0.144615	0	0.846063	0.0138917	0.359375	1.36395		MAN1A1
																					HIF1A	0.103348	0.4	0.470917	0	0.375	1.34926		MCEMP1
																					PGD	0.0297813	0.2	0.416429	0.00343534	0.6875	1.33715		MTPN
																					MAN1A1	0.0654244	0.6	0.198142	0.00104868	0.46875	1.33337		NT5C3A
																					CARD16	0.189177	0.2	0.150117	0	0.765625	1.30492		PGD
																					LAP3	0.0359228	0.4	0.281023	2.46e-05	0.578125	1.2951		SGK1
																					FKBP5	0.0542039	0.4	0.41444	0.0004934	0.421875	1.29101		SP100
																					PRPS2	0.0859669	0	0.710989	0	0.484375	1.28133
																					SSR1	0.0478802	0.2	1	0.00039719	0.03125	1.27953
																					MANEA	0.0220401	0.2	0.145034	5.93e-07	0.90625	1.27333
																					C3AR1	0.0743972	0	0.287557	0.00242926	0.859375	1.22376
																					GSTK1	0.0332938	0.2	0.165352	0.00013056	0.78125	1.18003
																					ADD3	0.0203552	0.4	0.245925	1.71e-06	0.5	1.16628
																					CFL1	0.106971	0	0.0566301	0.00168103	0.984375	1.14966
																					ARG1	0.338979	0	0.0121723	0.00172407	0.75	1.10288
																					IFI44L	0.0571355	0	0.19702	0.0034053	0.84375	1.10131
																					SLC27A2	0.227679	0	0.0237084	0.00133753	0.8125	1.06522
																					ERGIC2	0.124814	0	0.330335	0	0.546875	1.00202
																					TFRC	0.00569895	0.2	0.448601	0	0.34375	0.99805
																					H2AC6	0.0563384	0	0.132246	0	0.796875	0.98546
																					TRAM2	0	0.2	0.0416663	0	0.671875	0.913541
																					IKZF2	0.0629931	0	0.20793	0.00378446	0.625	0.899707
																					CD226	0.0377526	0.2	0.0126113	0	0.640625	0.890989
																					ANXA1	0.0262528	0.2	0.11479	0	0.515625	0.856668
																					CANX	0.183186	0	0.0170682	1.97e-08	0.65625	0.856504
																					KCNA3	0.0304792	0.2	0.155531	0	0.4375	0.82351
																					OXCT1	0.542046	0	0.220165	0.0420901	0.015625	0.819925
																					SAMD9	0.152132	0	0.333733	0	0.3125	0.798365
																					TRAM1	0.00338674	0	0.613973	0.00454173	0.171875	0.793777
																					IL23R	0.111285	0	0.119691	0.0176328	0.53125	0.779858
																					DERL1	0.0661152	0	0.189392	0.104093	0.40625	0.76585
																					ISG20	0.0103485	0.2	0.302061	0.00538583	0.234375	0.752171
																					CREM	0.0454737	0	0.564543	0	0.140625	0.750642
																					OAT	0.0388538	0.2	0.297879	0	0.1875	0.724233
																					CAPZA1	0.0206688	0	0.0791971	0.0113075	0.59375	0.704923
																					CLEC4D	0.3251	0	0.0715771	0.00022147	0.296875	0.693773
																					SLFN5	0.0690067	0.2	0.163783	0.00224281	0.25	0.685033
																					IFITM2	0.0459071	0	0.151366	0.00250546	0.453125	0.652904
																					SPTLC2	0.00633897	0	0.0657829	0.00574896	0.5625	0.640371
																					CCR3	0.229276	0.2	0.0577078	0.0318211	0.109375	0.62818
																					GBP5	0.0163079	0.2	0.118254	0	0.21875	0.553312
																					GBP4	0.0598026	0	0.115772	0.0321219	0.328125	0.535822
																					RPE	0.00272587	0	0.316474	0	0.203125	0.522325
																					H2BC5	0.11735	0	0.0961421	8.27e-05	0.28125	0.494825
																					TKTL1	0.168708	0	0.229782	0.00200692	0.09375	0.494247
																					PIGK	0.0269492	0	0.407983	0	0.046875	0.481807
																					GOLT1B	0.00081335	0.4	0	0.00466008	0.0625	0.467973
																					DNAJC3	0.0362689	0	0.0134698	0.00815514	0.390625	0.448519
																					AASS	0.0230831	0.2	0.0464247	0.00028969	0.15625	0.426048
																					CD69	0.0263619	0	0.038764	0.00091068	0.265625	0.331662
																					PSAT1	0.00185801	0	0.113937	0.00032969	0.125	0.241125
																					TNFRSF9	0.0632543	0	0.0404297	0.00156824	0.078125	0.183377

## Sheet: COVID vs non-COVID ICU
	Machine Learning Round 1										Machine Learning Round 2										Machine Learning Round 3
1		RF	DTREE	ADB	GB	SVM	Overall		Top 20 Features			RF	ADB	LDA	GB	SVM	Overall		Top 10 Features			LR	RF	GB	KNN	NB	Overall		Top 20 Genes
	Plasma Cell	1	1	0.111111	1	0.971429	4.08254		Anti inflammation		Plasma Cell	1	0.375	0.39066	1	0.894737	3.6604		Cell Cycle		EGR1	0.538466	0.525298	1	0.901961	0.892157	3.85788		ASAP1
	IFN	0.416687	0.757845	1	0.404766	0.628571	3.20787		Cell Cycle		IFN	0.943324	1	0.0274925	0.679228	0.157895	2.80794		Erythrocytes		G6PD	0.300911	1	0.771555	0.107843	0.823529	3.00384		CAMP
	Erythrocytes	0.446132	0.521818	0.333333	0.551707	0.285714	2.13871		Cytotoxic, Activated T Cell		Erythrocytes	0.384668	0.375	0.207128	0.492881	0.947368	2.40705		IFN		SDC1	1	0.541569	0	0.470588	0.735294	2.74745		CLEC4C
	pDC	0.622651	0	0.555556	0.103704	0.542857	1.82477		Dendritic Cell		Pentose Phosphate Signature	0.298917	0.625	0.573069	0.0232949	0.736842	2.25712		Inflammatory_Neutrophil		FBXL2	0.289607	0.81163	0	0.578431	0.862745	2.54241		CS
	Cell Cycle	0.37779	0	0.222222	0	0.914286	1.5143		Erythrocytes		Inflammatory_Neutrophil	0.540116	0.125	1	0.00391773	0.315789	1.98482		NFkB Complex		PRPS2	0.00150752	0.469854	5.72e-07	0.960784	0.95098	2.38313		CXCL1
	Anti inflammation	0.0767506	0	0.222222	0.00263529	0.942857	1.24447		Glycolysis		Cell Cycle	0.537052	0.375	0.110966	0.040943	0.684211	1.74817		NK Cell		CAMP	0.593526	0.178271	0	0.568627	0.990196	2.33062		DLAT
	ROS Protection	0.120059	0	0.222222	0.0054213	0.8	1.1477		Granulocyte		NK Cell	0	0.5	0.143085	0.02688	1	1.66997		NLRP3 Inflammasome		ASAP1	0.14886	0.65086	0.00307189	0.862745	0.627451	2.29299		EGR1
	Pentose Phosphate Signature	0.0861962	0	0.333333	0.0426236	0.657143	1.1193		IFN		NFkB Complex	0.0785514	0.375	0.235139	0.0184974	0.842105	1.54929		Pentose Phosphate Signature		CXCL1	0.269869	0.0583356	0	0.833333	0.980392	2.14193		FBXL2
	NK Cell	0.13528	0.177359	0.222222	0.124665	0.457143	1.11667		Inflammatory_Neutrophil		ROS Protection	0.167105	0.375	0.387788	0.00061579	0.368421	1.29893		Plasma Cell		IFITM1	0.542927	0.389908	0	0.970588	0.215686	2.11911		G6PD
	Granulocyte	0.0730532	0	0.111111	0.0394827	0.885714	1.10936		LDG		NLRP3 Inflammasome	0.11798	0.25	0.360665	0.0005392	0.526316	1.2555		ROS Protection		GMIP	0.167553	0.323903	0	0.852941	0.754902	2.0993		GBP4
	LDG	0.222979	0	0.222222	0.0890942	0.571429	1.10572		MHC II		Granulocyte	0.0602065	0	0.331514	0.0290151	0.789474	1.21021				DLAT	0.166739	0.0155639	0	0.980392	0.931373	2.09407		GFI1B
	MHC II	0.0747244	0	0	0.00542469	1	1.08015		NFkB Complex		Cytotoxic, Activated T Cell	0.0747102	0.375	0.127854	0	0.421053	0.998617				MKI67	0.145799	0.0774148	0	0.990196	0.852941	2.06635		GMIP
	Dendritic Cell	0.268237	0	0.222222	0.168194	0.4	1.05865		NK Cell		Glycolysis	0.150067	0.125	0.100223	0.04241	0.578947	0.996647				CS	0.207739	0.300619	0	0.803922	0.745098	2.05738		GP1BA
	Treg	0.105367	0	0.333333	0.0310176	0.485714	0.955433		NLRP3 Inflammasome		LDG	0.261956	0.375	0.0692197	0.174858	0.105263	0.986297				CLEC4C	0.578154	0.0553361	0.172899	0.529412	0.676471	2.01227		GYPA
	Proinflammatory IL-1 Family	0.241669	0	0.111111	0.0827208	0.514286	0.949786		pDC		pDC	0.364376	0.25	0.0206181	0.0488139	0.263158	0.946966				GP1BA	0.304151	0.106327	0	0.882353	0.686275	1.9791		IFITM1
	Glycolysis	0	0.120087	0	0.0301364	0.771429	0.921652		Pentose Phosphate Signature		MHC II	0.108248	0	0.108821	0.0264466	0.631579	0.875095				GYPA	0.766653	0.0227357	0	0.627451	0.372549	1.78939		MKI67
	Inflammatory_Neutrophil	0.0877521	0	0	4.96e-05	0.828571	0.916373		Plasma Cell		Treg	0.113045	0.25	0.0112028	0.00589385	0.473684	0.853826				GBP4	0.660011	0.0331384	0	0.27451	0.813725	1.78138		PRPS2
	NLRP3 Inflammasome	0.0267002	0	0	0	0.857143	0.883843		Proinflammatory IL-1 Family		Dendritic Cell	0.23224	0.125	0.141762	0.0459648	0.210526	0.755493				SDHAF3	0.414641	0.0863291	3.12e-05	0.598039	0.666667	1.76571		SDC1
	NFkB Complex	0.0840035	0	0.555556	0	0.228571	0.868131		ROS Protection		Anti inflammation	0.0566911	0.125	0.334147	0.0712468	0.0526316	0.639716				GFI1B	0.0191193	0.0238895	0	0.941176	0.77451	1.7587		SDHAF3
	Cytotoxic, Activated T Cell	0.0585614	0	0	0.0193442	0.742857	0.820763		Treg		Proinflammatory IL-1 Family	0.216626	0.25	0	0.131232	0	0.597858				WEE1	0.0477132	0.00285291	0	1	0.696078	1.74664		WEE1
	Platelets	0.0929638	0	0	0	0.714286	0.807249					RF	ADB	GB	SVM	NB	Overall				TRAF1	0.289031	0.0115275	0	0.715686	0.72549	1.74173
	CD40 Activated B Cell	0.423585	0	0.222222	0.00538669	0.142857	0.794051				Plasma Cell	1	0.833333	1	0.631579	1	4.46491		CD40 Activated B Cell		E2F3	0.160597	0.0371112	0	0.617647	0.911765	1.72712
	TNF	0.0655088	0	0	0	0.685714	0.751223				CD40 Activated B Cell	0.972692	1	0.187429	0.789474	0.894737	3.84433		Erythrocytes		DAB2	0.0296378	0.0248134	0	0.72549	0.941176	1.72112
	T Cell	0.0655566	0	0	0.0590764	0.6	0.724633				IFN	0.743506	1	0.79407	0.210526	0.842105	3.59021		IFN		PDK1	0.0646939	0.0294908	0	0.892157	0.715686	1.70203
	Classical Complement Pathway	0.00741733	0.375272	0.111111	0.0183266	0.2	0.712127				TCA cycle	0.45009	1	0.21789	0.526316	0.684211	2.87851		LDG		H6PD	0.12929	0.452799	0	0.117647	1	1.69974
	Unfolded Protein	0.167839	0	0	0	0.428571	0.59641				pDC	0.654444	0.5	0.088618	0.842105	0.789474	2.87464		NK Cell		MPO	0.506208	0	0	0.235294	0.901961	1.64346
	Monocyte	0.0557226	0	0.111111	0.00055372	0.371429	0.538816				LDG	0.386128	0.666667	0.249407	0.315789	0.947368	2.56536		pDC		THEMIS2	0.0660281	0.0114248	0.00875682	0.656863	0.843137	1.58621
	TCA cycle	0.159159	0	0.111111	0.164728	0.0857143	0.520713				Erythrocytes	0.439029	0.333333	0.445399	1	0.0526316	2.27039		Plasma Cell		OLFM4	0.101585	0	0	0.872549	0.607843	1.58198
	Fatty Acid Beta Oxidation	0.0670809	0	0	0	0.342857	0.409938				ROS Protection	0.256526	0.5	0.00739297	0.736842	0.631579	2.13234		ROS Protection		TNFAIP2	0.0633242	0.026093	0	0.686275	0.794118	1.56981
	Oxidative Phosphorylation	0.0638351	0	0	0.0253322	0.257143	0.34631				NK Cell	0.303056	0.833333	0.229519	0.368421	0.263158	1.99749		TCA cycle		CDKN3	0.279642	0.0814577	9.66e-06	0.813725	0.392157	1.56699
	Alternative Complement Pathway	0.173669	0	0.111111	0.0500547	0	0.334835				Unfolded Protein	0.471794	0.166667	0.0229436	0.421053	0.736842	1.8193		Unfolded Protein		AMPD3	0.318145	0.414438	0.0132273	0.176471	0.637255	1.55954
	Fatty Acid Alpha Oxidation	0.00436708	0	0	0	0.314286	0.318653				Pentose Phosphate Signature	0.236122	0.5	0.0986199	0.263158	0.578947	1.67685				SDHA	0.0451453	0.561768	0	0.45098	0.470588	1.52848
	Amino Acid Metabolism	0.187519	0	0	0.00763885	0.0285714	0.223729				Cytotoxic, Activated T Cell	0.0785641	0.166667	0.0491676	0.947368	0.315789	1.55756				CXCL8	0.277366	0.0163288	0.00115229	0.254902	0.960784	1.51053
	Anergic / Activated T cells	0.0335605	0	0.111111	0	0.0571429	0.201814				Classical Complement Pathway	0.140519	0.333333	0.0113992	0.684211	0.157895	1.32736				SSPN	0.339827	0.00639215	6.94e-05	0.647059	0.509804	1.50315
	Tactivated	0.020141	0	0	0	0.171429	0.19157				Tactivated	0.0893087	0.166667	0.0610108	0.578947	0.421053	1.31699				MCM10	0.360452	0.346467	0	0.5	0.284314	1.49123
	Apoptosis	0.0281077	0	0	0.00172184	0.114286	0.144115				Inflammatory_Neutrophil	0.282256	0.166667	0.00245602	0.473684	0.210526	1.13559				SDHC	0.331611	0.359897	0	0.607843	0.186275	1.48563
2		LR	RF	ADB	GB	SVM	Overall		Top 20 Features		Apoptosis	0.0583222	0	0.0333335	0.894737	0	0.986393				FCER2	0.270237	0.00295559	0	0.372549	0.833333	1.47907
	IFN	1	0.761624	0.5	1	1	4.26162		IFN		Granulocyte	0.148247	0.166667	0.00037937	0.0526316	0.473684	0.841609				MCM2	0.199493	0.123863	0	0.441176	0.705882	1.47041
	pDC	0.270646	0.779298	1	0.551808	0.857143	3.45889		Anergic / Activated T cells		Glycolysis	0.170021	0	0.0214289	0.105263	0.526316	0.823029				LDHB	0.096931	0	0.00176259	0.794118	0.568627	1.46144
	Plasma Cell	0.567514	1	0.666667	0.163501	0.371429	2.76911		Apoptosis		T Cell	0.172703	0	0.0105688	0.157895	0.105263	0.44643				PDPR	0.0971213	0	0	0.931373	0.431373	1.45987
	TCA cycle	0.482694	0.438749	0.5	0.704986	0.2	2.32643		CD40 Activated B Cell		Anergic / Activated T cells	0	0	0	0	0.368421	0.368421				MYBL2	0.363257	0.0444941	0	0.823529	0.22549	1.45677
	ROS Protection	0.234192	0.211604	1	0.0187012	0.8	2.2645		Classical Complement Pathway			RF	ADB	LDA	GB	NB	Overall				DUSP4	0.102287	0	0	0.421569	0.921569	1.44542
	Pentose Phosphate Signature	0.634668	0.278666	0.333333	0.00041012	0.971429	2.21851		Cytotoxic, Activated T Cell		Plasma Cell	1	0.666667	0.476045	1	0.473684	3.6164		CD40 Activated B Cell		LGALS3BP	0.196855	0.0113894	0	0.95098	0.245098	1.40432
	T Cell	0.511916	0.303221	0.333333	0.0227228	0.6	1.77119		Erythrocytes		TCA cycle	0.668241	0.5	0.493379	0.550983	0.789474	3.00208		Cell Cycle		CCNB1	0.0738057	0.0740929	0	0.764706	0.460784	1.37339
	NK Cell	0.171328	0.183295	0.333333	0.0663576	0.885714	1.64003		Glycolysis		IFN	0.652573	1	0.350086	0.518163	0.210526	2.73135		Erythrocytes		PTTG1	0.454762	0.769229	0	0.00980392	0.117647	1.35144
	Erythrocytes	0.132739	0.307448	0	0.0832372	0.914286	1.43771		Granulocyte		Inflammatory_Neutrophil	0.589816	0.666667	0.506954	0.00803134	0.684211	2.45568		IFN		CASP10	0.179969	0.0893146	0.00015463	0.588235	0.480392	1.33807
	Anergic / Activated T cells	0.351316	0.269854	0.333333	0.008198	0.457143	1.41984		Inflammatory_Neutrophil		CD40 Activated B Cell	0.51196	0.5	1	0.00113414	0.368421	2.38152		Inflammatory_Neutrophil		CEP55	0.188688	0.286083	0	0.480392	0.382353	1.33752
	Apoptosis	0.305948	0.0410176	0	1e-06	0.942857	1.28982		LDG		Cell Cycle	0.539262	0	0.725312	0.00070836	1	2.26528		LDG		BCL2A1	0.231549	0.00512704	0	0.519608	0.578431	1.33472
	Classical Complement Pathway	0.0241599	0.255111	0.166667	0.00530495	0.828571	1.27981		NK Cell		NK Cell	0.361201	1	0.173943	0.150832	0.578947	2.26492		NK Cell		TSC22D1	0.147292	0.0306467	0	0.362745	0.784314	1.325
	LDG	0.333474	0.105398	0.333333	0.225945	0.257143	1.25529		pDC		LDG	0.263117	0.833333	0.115437	0.0841447	0.894737	2.19077		Plasma Cell		RPGR	0.313446	0.126426	8.54e-09	0.539216	0.343137	1.32222
	Glycolysis	0.312214	0.088199	0.166667	2.13e-07	0.628571	1.19565		Pentose Phosphate Signature		TNF	0.193275	0.333333	0.711894	0.00092629	0.842105	2.08153		TCA cycle		PDP2	0.118718	0	0	0.921569	0.27451	1.3148
	Cytotoxic, Activated T Cell	0.363585	0.0831569	0.166667	0.00494249	0.571429	1.18978		Plasma Cell		Erythrocytes	0.417466	0.166667	0.142758	0.476426	0.736842	1.94016		TNF		EREG	0.0804406	0.00410163	0	0.323529	0.882353	1.29042
	Tactivated	0.199551	0.0961916	0	0.0281871	0.771429	1.09536		ROS Protection		pDC	0.600638	1	0	0.124247	0.0526316	1.77752				TNFRSF17	0.250107	0.0294644	0	0.705882	0.294118	1.27957
	Inflammatory_Neutrophil	0.301706	0.459903	0	1.93e-06	0.314286	1.0759		T Cell		T Cell	0.350909	0	0.363114	0.067613	0.947368	1.729				AURKA	0.251087	0.0131043	0	0.411765	0.598039	1.27399
	Unfolded Protein	0.0633414	0.218383	0.333333	0.0283888	0.428571	1.07202		Tactivated		Pentose Phosphate Signature	0.213633	0.666667	0.233392	0.00974098	0.263158	1.38659				ISG20	0.173533	0.056939	0	0.77451	0.264706	1.26969
	Granulocyte	0.439883	0.075623	0	0.0171068	0.514286	1.0469		TCA cycle		Monocyte	0.108259	0	0.920496	0.00545768	0.315789	1.35				IDH1	0.179891	0.081139	0	0.666667	0.323529	1.25123
	CD40 Activated B Cell	0.197863	0.2023	0.5	0.00048462	0.114286	1.01493		Unfolded Protein		Apoptosis	0	0	0.477778	0	0.631579	1.10936				TKTL1	0.154498	0.022262	1.05e-10	0.676471	0.352941	1.20617
	NFkB Complex	0.128109	0.130363	0	0.00053563	0.742857	1.00186				Granulocyte	0.131409	0.333333	0.318021	9.64e-06	0.157895	0.940668				SP110	0.0471652	0.0266209	0	0.637255	0.490196	1.20124
	MHC II	0.319913	0.219524	0.166667	0.0130754	0.228571	0.947751				Anergic / Activated T cells	0.363717	0.333333	0.11565	0.00253843	0.105263	0.920502				BHLHE41	0.0840959	0	0	0.54902	0.558824	1.19194
	Amino Acid Metabolism	0.0321871	0	0.166667	0.00010316	0.714286	0.913243				Cytotoxic, Activated T Cell	0.0305776	0	0.362271	0.0225804	0.421053	0.836482				PAICS	0.0704339	0.00971627	0.00099042	0.137255	0.970588	1.18898
	Treg	0.040047	0.10661	0.166667	0.101687	0.485714	0.900725				Amino Acid Metabolism	0.0173629	0	0.291175	0.0003578	0.526316	0.835212				TK1	0.185513	0.0252665	0	0.382353	0.588235	1.18137
	Proinflammatory IL-1 Family	0.2947	0.150692	0.166667	1.58e-06	0.285714	0.897775				Fatty Acid Beta Oxidation	0.0940537	0.333333	0.112719	0.00378754	0	0.543893				IDO1	0.024467	0	0	0.843137	0.313725	1.18133
	Fatty Acid Beta Oxidation	0.0699299	0.100465	0	7.46e-09	0.657143	0.827538					RF	ADB	LDA	GB	SVM	Overall				CALD1	0.0649464	0.00585599	0	0.558824	0.529412	1.15904
	Fatty Acid Alpha Oxidation	0.0584589	0.0700776	0	0	0.685714	0.814251				Plasma Cell	0.861555	0.428571	0.404223	1	0.684211	3.37856		CD40 Activated B Cell		SAMD9	0.114194	0.0768444	0.0205159	0.490196	0.421569	1.12332
	Alternative Complement Pathway	0.445109	0.179388	0.166667	0.00125493	0	0.792418				pDC	1	1	0.0193371	0.425652	0.894737	3.33973		Cell Cycle		RBKS	0.00655402	0.0149649	0	0.294118	0.803922	1.11956
	TNF	0.170094	0.14395	0.333333	0.00077099	0.0857143	0.733863				IFN	0.410464	0.714286	0.0124862	0.614202	0.947368	2.69881		Erythrocytes		GINS2	0.142357	0	0.0163638	0.166667	0.764706	1.09009
	Dendritic Cell	0.103386	0.0951162	0.166667	0.00376738	0.342857	0.711794				Cell Cycle	0.705511	0.285714	0.557291	0.173586	0.842105	2.56421		IFN		PRDM1	0.0633503	0.077777	0	0.0588235	0.872549	1.0725
	Platelets	0.0857261	0.0409988	0	0.0316447	0.542857	0.701227				Erythrocytes	0.590666	1	0.168672	0.627913	0.157895	2.54515		Inflammatory_Neutrophil		PDK2	0.205407	0.0717704	0	0.127451	0.656863	1.06149
	NLRP3 Inflammasome	0.164395	0.0812399	0	6.52e-05	0.4	0.6457				CD40 Activated B Cell	0.916946	0.142857	0.847335	0.15259	0.421053	2.48078		LDG		CEACAM6	0.117506	0	0	0.284314	0.647059	1.04888
	Cell Cycle	0	0.169627	0.166667	0.0455014	0.142857	0.524652				LDG	0.664294	0.714286	0.101487	0.259561	0.736842	2.47647		pDC		OGDH	0.0945071	0.198359	3.5e-06	0.186275	0.54902	1.02816
	Monocyte	0.388795	0.0591956	0	4.15e-06	0.0571429	0.505138				Pentose Phosphate Signature	0.140748	0.714286	0.262313	0.220715	0.631579	1.96964		Pentose Phosphate Signature		IFITM3	0.466986	0.133463	5.68e-05	0.313725	0.107843	1.02207
	Oxidative Phosphorylation	0.145888	0.0635099	0	0.118403	0.171429	0.499229				Inflammatory_Neutrophil	0.431727	0.142857	1	0.00266092	0.0526316	1.62988		Plasma Cell		CD38	0.394481	0.0952297	0.0608792	0.0392157	0.411765	1.00157
	Anti inflammation	0.090359	0.1713	0.166667	2.6e-06	0.0285714	0.4569				TNF	0.119855	0.142857	0.763796	0.00900115	0.578947	1.61446		TNF		HMMR	0	0.0178018	0	0.911765	0.0588235	0.98839
3		LR	RF	ADB	LDA	SVM	Overall		Top 20 Features		Anti inflammation	0.275556	0.142857	0.130963	0.0546936	1	1.60407				NFE2	0.11535	0.109464	0.0133466	0.215686	0.519608	0.973455
	Plasma Cell	0.925696	1	0.666667	0.558253	0.142857	3.29347		Amino Acid Metabolism		Monocyte	0.00491804	0.142857	0.836888	0	0.368421	1.35308				IGHMBP2	0.137556	0.0058123	0	0.784314	0.0294118	0.957093
	CD40 Activated B Cell	0.293808	0.260173	0.333333	0.655802	0.771429	2.31454		Anergic / Activated T cells		ROS Protection	0.194424	0.142857	0.180571	0.00123724	0.789474	1.30856				INHBA	0.444533	0.0521086	0.0108414	0.392157	0.0490196	0.948659
	IFN	1	0.299699	0.666667	0.126278	0.0285714	2.12121		Apoptosis		TCA cycle	0.381945	0.285714	0.291042	0.135493	0.105263	1.19946				IFITM2	0.0657337	0.0169999	0	0.754902	0.0784314	0.916067
	Granulocyte	0.512568	0.03418	0.166667	0.265499	1	1.97891		CD40 Activated B Cell		T Cell	0.226255	0	0.214475	0.0906314	0.473684	1.00504				VEGFA	0.221235	0.05553	0	0.509804	0.127451	0.91402
	Anergic / Activated T cells	0.212821	0.0906943	0.666667	0.0899156	0.914286	1.97438		Cell Cycle		Dendritic Cell	0.249979	0.285714	0	0.124368	0.315789	0.975851				SERPIND1	0.189813	0.0868495	0	0.431373	0.205882	0.913917
	Inflammatory_Neutrophil	0.361188	0.226974	0	0.983678	0.371429	1.94327		Cytotoxic, Activated T Cell		Anergic / Activated T cells	0.116299	0.142857	0.00493499	0.0805763	0.526316	0.870983				ADGRE2	0.109677	0.0559802	1.19e-07	0.735294	0	0.900952
	Pentose Phosphate Signature	0.846358	0.14466	0.5	0.224221	0.171429	1.88667		Erythrocytes		Granulocyte	0.0541707	0.285714	0.183976	0.0420277	0.210526	0.776415				BRCA1	0.12922	0.116346	1.4e-07	0.0882353	0.539216	0.873017
	TNF	0.222962	0.117635	0	1	0.514286	1.85488		Fatty Acid Beta Oxidation		Cytotoxic, Activated T Cell	0.00059629	0.142857	0.105244	0.032149	0.263158	0.544004				CCNB2	0.182453	0.185419	0	0.0490196	0.45098	0.867872
	pDC	0.191793	0.477685	0.666667	0.0408623	0.4	1.77701		Granulocyte		Amino Acid Metabolism	0	0.285714	0.248705	0.00078118	0	0.5352				PDK4	0.227698	0.0351105	7.42e-18	0.0980392	0.5	0.860848
	NK Cell	0.291468	0.136648	1	0.0584836	0.257143	1.74374		IFN			RF	ADB	GB	SVM	NB	Overall		IFN		TNFAIP3	0.0469193	0.00544971	0	0.696078	0.0686275	0.817075
	TCA cycle	0.41776	0.224144	0.333333	0.0955273	0.6	1.67076		Inflammatory_Neutrophil		IFN	1	0.714286	1	0.0526316	0.947368	3.71429		Apoptosis		SDC4	0.0327944	0.011167	0	0.460784	0.303922	0.808667
	T Cell	0.232281	0.302912	0.333333	0	0.8	1.66853		LDG		Plasma Cell	0.809649	0.571429	0.498789	0.526316	1	3.40618		CD40 Activated B Cell		TYMS	0.00810755	0.0340621	0	0.745098	0.0196078	0.806876
	Monocyte	0.333179	0.0496108	0	0.958866	0.314286	1.65594		Monocyte		LDG	0.301481	0.857143	0.43355	0.947368	0.842105	3.38165		Erythrocytes		TSPO2	0.162302	0.0054343	0	0.352941	0.254902	0.77558
	Apoptosis	0.415785	0.0516162	0.166667	0.17614	0.828571	1.63878		NK Cell		pDC	0.808026	0.428571	0.033042	0.842105	0.894737	3.00648		LDG		RPE	0.154848	0.00585947	0	0.343137	0.235294	0.739139
	Fatty Acid Beta Oxidation	0.202869	0.06201	0	0.321913	0.971429	1.55822		pDC		TCA cycle	0.34376	0.714286	0.294001	0.368421	0.684211	2.40468		NK Cell		ASPM	0.098671	0	0	0	0.617647	0.716318
	Erythrocytes	0.0810483	0.204429	0.5	0.156625	0.571429	1.51353		Pentose Phosphate Signature		NK Cell	0.0925222	1	0.0155277	0.210526	0.789474	2.10805		pDC		OGDHL	0.114105	0	0	0.147059	0.441176	0.70234
	Cytotoxic, Activated T Cell	0.324488	0.122008	0.166667	0.237602	0.657143	1.50791		Plasma Cell		Unfolded Protein	0.555737	0.142857	0.276805	0.263158	0.736842	1.9754		Plasma Cell		IL18	0.272723	0.108545	0.00390033	0.156863	0.156863	0.698893
	LDG	0.635546	0.141049	0.333333	0.0117728	0.342857	1.46456		T Cell		CD40 Activated B Cell	0.661016	0.714286	0.0227143	0.157895	0.315789	1.8717		TCA cycle		MGLL	0.147753	0.0114162	0	0.205882	0.333333	0.698385
	Amino Acid Metabolism	0	0.00113623	0	0.466623	0.942857	1.41062		TCA cycle		Erythrocytes	0.287914	0.142857	0.219224	0.684211	0.526316	1.86052		Unfolded Protein		MN1	0.0288035	0.00571656	0	0.245098	0.362745	0.642363
	Cell Cycle	0.0187502	0.139392	0	0.430396	0.742857	1.3314		TNF		Apoptosis	0.111762	0	0.0371478	1	0.578947	1.72786				CDC20	0.00815551	0.190158	0	0.0294118	0.401961	0.629686
	Proinflammatory IL-1 Family	0.298563	0.00499738	0	0.126777	0.857143	1.28748				Pentose Phosphate Signature	0.313471	0.428571	0.0156758	0.421053	0.421053	1.59982				RNASE3	0.108708	0.00441563	3.17e-16	0.333333	0.166667	0.613124
	Classical Complement Pathway	0.19872	0.087686	0.166667	0.0181436	0.714286	1.1855				Proinflammatory IL-1 Family	0.161563	0.142857	0.0127144	0.631579	0.631579	1.58029				SLC4A1	0.0466599	0.00292799	0	0.401961	0.147059	0.598608
	Tactivated	0.198644	0.0659006	0.166667	0.0153289	0.685714	1.13225				Tactivated	0.0575824	0.428571	0	0.789474	0.263158	1.53879				RFTN1	0.0808747	0.0274732	0	0.303922	0.137255	0.549524
	Fatty Acid Alpha Oxidation	0.0988135	0.0390158	0.333333	0.0893836	0.542857	1.1034				Inflammatory_Neutrophil	0.382883	0.142857	0.0103023	0.894737	0.0526316	1.48341				PTGS2	0.207669	0.107086	0.161417	0.0196078	0.00980392	0.505584
	Anti inflammation	0.0500992	0.0338567	0	0.119439	0.885714	1.08911				MHC II	0.329859	0.428571	0.00277524	0.578947	0	1.34015				HP	0.201779	0.0111379	0	0.196078	0.0882353	0.49723
	ROS Protection	0.392558	0.0951629	0.166667	0.199308	0.2	1.0537				T Cell	0.17741	0	0.00499455	0.736842	0.368421	1.28767				MX2	0.042593	0.0472396	0	0.22549	0.176471	0.491793
	MHC II	0.338427	0.0225132	0.5	0.0795672	0.0857143	1.02622				Oxidative Phosphorylation	0.272554	0.142857	0.177652	0.473684	0.210526	1.27727				IL16	0.096044	0.0238248	0.00094216	0.264706	0.0392157	0.424733
	Unfolded Protein	0.00790065	0.0804166	0.166667	0.300384	0.428571	0.98394				NFkB Complex	0.113638	0.142857	0.0175513	0.315789	0.473684	1.06352				PKM	0.126668	0.095329	0.0037154	0.0686275	0.0980392	0.392379
	Treg	0.149779	0.086408	0.166667	0.0418686	0.485714	0.930437				Anergic / Activated T cells	0.0980957	0	0.00028781	0.105263	0.105263	0.30891				HOMER2	0.03409	0.00976854	0	0.0784314	0.196078	0.318368
	Alternative Complement Pathway	0.604904	0.187974	0	0.123315	0	0.916193				Amino Acid Metabolism	0	0	0.00992112	0	0.157895	0.167816					LR	RF	ADB	KNN	NB	Overall		Top 20 Genes
	Dendritic Cell	0.124674	0.0698634	0	0.087897	0.628571	0.911006					RF	DTREE	ADB	GB	SVM	Overall				SDC1	1	0.967934	1	0.519608	0.0196078	3.50715		AMPD3
	Glycolysis	0.215476	0.008398	0	0.182571	0.457143	0.863588				Plasma Cell	1	1	0.625	1	0.578947	4.20395		Apoptosis		EGR1	0.491482	0.561574	0.5	0.921569	0.735294	3.20992		ASAP1
	NFkB Complex	0.147128	0.035646	0.166667	0.052655	0.285714	0.68781				NK Cell	0.305732	0.559373	0.625	0.410878	0.684211	2.58519		CD40 Activated B Cell		G6PD	0.309008	1	0	0.872549	0.960784	3.14234		CAMP
	NLRP3 Inflammasome	0.255941	0	0	0.162865	0.228571	0.647378				IFN	0.239731	0	1	0.301702	0.894737	2.43617		Cell Cycle		FBXL2	0.312285	0.766573	0	0.892157	0.980392	2.95141		CDKN3
	Oxidative Phosphorylation	0.242483	0.0522998	0	0.225452	0.0571429	0.577378				pDC	0.675379	0.512371	0.375	0.348386	0.368421	2.27956		Erythrocytes		CDKN3	0.282291	0.0320531	0.75	0.990196	0.588235	2.64278		E2F3
	Platelets	0.0701757	0.0938008	0	0.115729	0.114286	0.393992				CD40 Activated B Cell	0.454689	0	0.375	0.115114	0.947368	1.89217		IFN		ASAP1	0.161382	0.656894	0.25	0.676471	0.892157	2.6369		EGR1
4		RF	ADB	LDA	GB	SVM	Overall		Top 20 Features		Cell Cycle	0.582881	0	0.125	0.0200839	1	1.72797		NK Cell		GBP4	0.645141	0.0160946	0.125	0.862745	0.95098	2.59996		EREG
	IFN	0.610476	1	0.0549858	1	0.971429	3.63689		IFN		Erythrocytes	0.477339	0	0.5	0.2692	0.315789	1.56233		pDC		PTTG1	0.56455	0.555099	0.125	0.833333	0.421569	2.49955		FBXL2
	Inflammatory_Neutrophil	0.423235	0.111111	0.914347	1.52e-05	1	2.44871		Amino Acid Metabolism		Pentose Phosphate Signature	0.34559	0	0.375	0.0626291	0.736842	1.52006		Pentose Phosphate Signature		FCER2	0.382466	0.0414666	0.125	0.882353	0.970588	2.40187		FCER2
	Plasma Cell	1	0.222222	0.410926	0.326107	0.285714	2.24497		Anergic / Activated T cells		TCA cycle	0.322706	0	0.5	0.149529	0.473684	1.44592		Plasma Cell		GYPA	0.62278	0.0152256	0	0.803922	0.901961	2.34389		G6PD
	CD40 Activated B Cell	0.342986	0.222222	0.499293	0.00155063	0.828571	1.89462		Anti inflammation		Apoptosis	0.0919563	0.133895	0.25	0.00031547	0.789474	1.26564		TCA cycle		IFITM3	0.488555	0.0541222	0	1	0.754902	2.29758		GBP4
	TNF	0.138376	0	1	0.0049558	0.685714	1.82905		CD40 Activated B Cell		Anti inflammation	0.154166	0	0	0.00159178	0.842105	0.997863				GMIP	0.188583	0.217346	0.125	0.823529	0.921569	2.27603		GFI1B
	LDG	0.304289	0.444444	0	0.780623	0.228571	1.75793		Cell Cycle		MHC II	0.147736	0.365979	0.125	0.102994	0.210526	0.952236				IFITM1	0.543761	0.458932	0	0.45098	0.77451	2.22818		GMIP
	TCA cycle	0.276428	0.444444	0.0018118	0.369994	0.514286	1.60696		Cytotoxic, Activated T Cell		Proinflammatory IL-1 Family	0.149631	0	0.5	0.00706108	0.263158	0.91985				GP1BA	0.325107	0.152102	0	0.813725	0.911765	2.2027		GP1BA
	Cell Cycle	0.37987	0	0.386171	0.0346564	0.8	1.6007		Dendritic Cell		T Cell	0.258938	0	0	0.0226674	0.631579	0.913185				H6PD	0.159168	0.258313	0	0.794118	0.882353	2.09395		GYPA
	pDC	0.923255	0.333333	0.050781	0.131372	0.0571429	1.49588		Erythrocytes		Cytotoxic, Activated T Cell	0.0421899	0.240174	0.375	0.123203	0.105263	0.88583				CAMP	0.500221	0.102718	0.125	0.696078	0.656863	2.08088		H6PD
	Anergic / Activated T cells	0.476218	0	0.0503437	0.0297627	0.914286	1.47061		Granulocyte		Granulocyte	0.0465492	0.14059	0.25	0	0.421053	0.858191				EREG	0.143802	0	0	0.901961	0.990196	2.03596		IFITM1
	Amino Acid Metabolism	0	0.111111	0.401019	6.5e-05	0.942857	1.45505		Inflammatory_Neutrophil		ROS Protection	0.0626998	0	0.125	0.00066781	0.526316	0.714683				E2F3	0.184342	0.11545	0	0.931373	0.715686	1.94685		IFITM3
	Dendritic Cell	0.380536	0.111111	0.0566403	0.097889	0.714286	1.36046		LDG		Tactivated	0.128395	0	0.125	0.00035991	0.0526316	0.306387				AMPD3	0.347096	0.221646	0.25	0.686275	0.382353	1.88737		PTTG1
	Anti inflammation	0.144773	0.111111	0.202228	0.0129917	0.885714	1.35682		Monocyte		Anergic / Activated T cells	0.0875468	0	0	0.0868415	0	0.174388				GFI1B	0.0591042	0.0256969	0	0.852941	0.941176	1.87892		SDC1
	Monocyte	0.127238	0.111111	0.97318	2.68e-05	0.114286	1.32584		pDC		Classical Complement Pathway	0	0	0	0.00906524	0.157895	0.16696				GINS2	0.0938778	0.0037461	0	0.843137	0.931373	1.87213
	Granulocyte	0.164423	0.333333	0.240881	0.016554	0.542857	1.29805		Pentose Phosphate Signature			RF	ADB	GB	SVM	NB	Overall				SDHC	0.348048	0.55246	0.125	0.509804	0.313725	1.84904
	ROS Protection	0.192695	0.222222	0.38665	0.0843046	0.371429	1.2573		Plasma Cell		pDC	0.496511	1	0.043639	0.842105	0.894737	3.27699		CD40 Activated B Cell		TNFAIP3	0.0457268	0.010743	0	0.980392	0.803922	1.84078
	Pentose Phosphate Signature	0.333098	0.333333	0.26309	0.00850206	0.257143	1.19517		ROS Protection		Plasma Cell	1	0.857143	0.57779	0.736842	0	3.17177		Erythrocytes		THEMIS2	0.0557043	0.00446315	0	0.911765	0.852941	1.82487
	Cytotoxic, Activated T Cell	0.13826	0.111111	0.170351	0.00079493	0.742857	1.16337		T Cell		CD40 Activated B Cell	0.75927	0.714286	0.0146233	0.263158	1	2.75134		IFN		BCL2A1	0.305444	0	0	0.647059	0.862745	1.81525
	Erythrocytes	0.228683	0	0.218768	0.0258443	0.657143	1.13044		TCA cycle		IFN	0.86023	0.714286	1	0.105263	0.0526316	2.73241		Inflammatory_Neutrophil		CEP55	0.173519	0.565725	0	0.480392	0.578431	1.79807
	T Cell	0.259416	0.222222	0.169715	0.0475573	0.4	1.09891		TNF		TCA cycle	0.257847	0.714286	0.4344	0.578947	0.631579	2.61706		LDG		IDH1	0.122401	0.087809	0	0.745098	0.823529	1.77884
	Classical Complement Pathway	0.0986795	0.111111	0.0888182	9.43e-06	0.771429	1.07005				LDG	0.19412	0.428571	0.364642	0.368421	0.947368	2.30312		pDC		HMMR	0.105057	0	0	0.77451	0.872549	1.75212
	Apoptosis	0.120229	0	0.0214127	0.00094524	0.857143	0.99973				Inflammatory_Neutrophil	0.289207	0	0.00112095	0.789474	0.789474	1.86928		Plasma Cell		DUSP4	0.137557	0.00376646	0	0.95098	0.598039	1.69034
	Unfolded Protein	0.208289	0	0.131583	0.153662	0.485714	0.979249				Erythrocytes	0.224846	0.142857	0.266122	0.947368	0.263158	1.84435		TCA cycle		CASP10	0.174896	0.00727954	0.25	0.588235	0.647059	1.66747
	Treg	0.273309	0.111111	0.042534	0.0895128	0.428571	0.945038				TNF	0.112852	0.285714	0.00366709	1	0.315789	1.71802		TNF		HOMER2	0.0265168	0.0265296	0	0.764706	0.843137	1.66089
	Fatty Acid Alpha Oxidation	0.172079	0	0.0312894	0	0.628571	0.83194				Treg	0.225446	0.285714	0.15715	0.315789	0.684211	1.66831		Treg		CD38	0.335815	0.0378667	0.125	0.539216	0.617647	1.65554
	Oxidative Phosphorylation	0.104025	0	0.255711	7.06e-05	0.457143	0.816949				ROS Protection	0.112892	0.571429	0.143726	0.473684	0.210526	1.51226				CLEC4C	0.576362	0.0369106	0	0.470588	0.568627	1.65249
	Fatty Acid Beta Oxidation	0.0919417	0	0.0685349	0.0195674	0.6	0.780044				Pentose Phosphate Signature	0.172622	0.714286	0.11013	0.0526316	0.421053	1.47072				DLAT	0.151032	0.00451975	0	0.960784	0.509804	1.62614
	Glycolysis	0.0935178	0	0.110934	0.00049033	0.571429	0.77637				Cell Cycle	0.189711	0	0.040605	0.894737	0.157895	1.28295				HP	0.00662118	0.0212155	0	0.754902	0.833333	1.61607
	Platelets	0.326503	0	0.124379	0.00958401	0.314286	0.774752				Proinflammatory IL-1 Family	0	0	0	0.684211	0.578947	1.26316				RPGR	0.265803	0.129718	0	0.205882	1	1.6014
	NK Cell	0.19151	0.333333	0.0485836	0.019348	0.171429	0.764203				Granulocyte	0.0918877	0	0.0305326	0.631579	0.473684	1.22768				CXCL1	0.279413	0.0328013	0	0.705882	0.54902	1.56712
	Proinflammatory IL-1 Family	0.105227	0.111111	0.134272	6.72e-05	0.342857	0.693534				MHC II	0.0307781	0.142857	0.00240004	0.157895	0.736842	1.07077				CCNB2	0.143687	0.0687733	0.125	0.54902	0.627451	1.51393
	Alternative Complement Pathway	0.379029	0.111111	0.177813	0.00633371	0	0.674287				Anergic / Activated T cells	0.0232337	0.285714	0.00528271	0.210526	0.526316	1.05107				BRCA1	0.148583	0.0676021	0	0.607843	0.686275	1.5103
	NLRP3 Inflammasome	0.130222	0.111111	0.0981754	2.41e-06	0.2	0.539511				Amino Acid Metabolism	0.034755	0.142857	0.00119572	0	0.842105	1.02091				CEACAM6	0.297875	0	0	0.490196	0.705882	1.49395
	Tactivated	0.149806	0.111111	0.0848394	0.0410017	0.0285714	0.415329				Monocyte	0.0813015	0	0.00245628	0.526316	0.368421	0.978495				CS	0.172092	0.169535	0	0.578431	0.558824	1.47888
	NFkB Complex	0.166215	0	0.0940437	0.00418512	0.142857	0.407301				T Cell	0.131573	0.142857	6.16e-05	0.421053	0.105263	0.800808				VEGFA	0.207406	0.0321087	0.125	0.441176	0.666667	1.47236
	MHC II	0.156604	0.111111	0.051945	0.00083809	0.0857143	0.406213					LR	RF	ADB	GB	SVM	Overall				RNASE3	0.068619	0.0144354	0	0.970588	0.392157	1.4458
5		LR	RF	DTREE	GB	SVM	Overall		Top 20 Features		Plasma Cell	0.788674	1	0.571429	1	0.684211	4.04431		Anergic / Activated T cells		IDO1	0.139107	0.00174818	0	0.460784	0.813725	1.41537
	Plasma Cell	0.764829	1	1	1	0.514286	4.27911		Amino Acid Metabolism		IFN	0.83833	0.540972	0.857143	0.740248	0.157895	3.13459		Apoptosis		SDHAF3	0.504659	0.144397	0.25	0.235294	0.235294	1.36964
	IFN	1	0.554365	0.649923	0.72068	0.171429	3.0964		Anergic / Activated T cells		Pentose Phosphate Signature	1	0.093851	1	0.0295778	0.789474	2.9129		CD40 Activated B Cell		RBKS	0	0.0157934	0	0.941176	0.411765	1.36873
	LDG	0.459271	0.332151	0.682458	0.622174	0.314286	2.41034		Apoptosis		pDC	0.14698	0.783731	1	0.170488	0.631579	2.73278		IFN		CCNB1	0.0906671	0.0681212	0	0.558824	0.637255	1.35487
	Erythrocytes	0.145761	0.445622	0	0.180756	1	1.77214		CD40 Activated B Cell		LDG	0.466988	0.31741	0.857143	0.733659	0.263158	2.63836		LDG		CXCL8	0.0843452	0.0107047	0	0.715686	0.539216	1.34995
	pDC	0.199956	0.623811	0	0.0686464	0.857143	1.74956		Erythrocytes		CD40 Activated B Cell	0.515478	0.531425	0.428571	0.0633906	0.947368	2.48623		MHC II		IFITM2	0.0585434	0.0237558	0	0.5	0.764706	1.34701
	Proinflammatory IL-1 Family	0.361174	0.225347	0.133019	0.0336883	0.971429	1.72466		IFN		MHC II	0.572794	0.177926	0.142857	0.0545328	1	1.94811		pDC		SERPIND1	0.194265	0.139852	0.125	0.0882353	0.784314	1.33167
	Inflammatory_Neutrophil	0.453721	0.331916	0	2.14e-06	0.828571	1.61421		Inflammatory_Neutrophil		ROS Protection	0.232143	0.0872633	0.428571	0.168471	0.578947	1.4954		Pentose Phosphate Signature		RFTN1	0.129423	0	0	0.784314	0.401961	1.3157
	CD40 Activated B Cell	0.419864	0.509111	0	0.00499679	0.657143	1.59111		LDG		Anergic / Activated T cells	0.317875	0.14639	0	0.0251364	0.894737	1.38414		Plasma Cell		CALD1	0.0382383	0	0	0.598039	0.676471	1.31275
	TCA cycle	0.326274	0.112269	0.212831	0.183267	0.685714	1.52035		MHC II		Apoptosis	0.315391	0.0972428	0.142857	0.0107471	0.736842	1.30308		ROS Protection		DAB2	0.0520828	0	0	0.72549	0.529412	1.30698
	Tactivated	0.465987	0.232782	0	0.00210537	0.8	1.50087		NFkB Complex		Cytotoxic, Activated T Cell	0.231202	0.0185165	0.428571	0.034362	0.473684	1.18634				PKM	0.139858	0.0616856	0.25	0.333333	0.460784	1.24566
	Pentose Phosphate Signature	0.765717	0.169994	0	0.072735	0.371429	1.37987		NK Cell		Inflammatory_Neutrophil	0.553981	0.0795199	0.428571	0.00893028	0.0526316	1.12363				IGHMBP2	0.0887336	0.01247	0.25	0.147059	0.745098	1.24336
	T Cell	0.313927	0.202874	0	0.00220898	0.742857	1.26187		Oxidative Phosphorylation		TNF	0.285316	0.151561	0.142857	0.0107066	0.526316	1.11676				TNFRSF17	0.317551	0.0527244	0.125	0.411765	0.333333	1.24037
	Anergic / Activated T cells	0.176695	0.163116	0	0.00182633	0.914286	1.25592		pDC		Monocyte	0.490535	0.0185785	0.142857	0.0260433	0.368421	1.04644				CDC20	0.0361635	0.0665127	0	0.529412	0.607843	1.23993
	Apoptosis	0.395172	0.10549	0	3.99e-05	0.714286	1.21499		Pentose Phosphate Signature		Tactivated	0.491539	0.0555877	0	0.0396255	0.421053	1.0078				MPO	0.571538	0.0190743	0.25	0.107843	0.264706	1.21316
	Unfolded Protein	0.0692292	0.36012	0.27415	0.0491695	0.428571	1.18124		Plasma Cell		Anti inflammation	0.0154635	0	0	0.142131	0.842105	0.9997				IL18	0.264201	0.134203	0.125	0.137255	0.490196	1.15085
	NK Cell	0.291204	0.212582	0	0.0364976	0.628571	1.16885		Proinflammatory IL-1 Family		Erythrocytes	0.112281	0.186269	0.142857	0.201703	0.210526	0.853636				WEE1	0.0907748	0.00890506	0	0.352941	0.696078	1.1487
	Amino Acid Metabolism	0.109136	0.0682428	0	0.00078085	0.942857	1.12102		T Cell		Cell Cycle	0	0.0870819	0.285714	0.0690044	0.315789	0.75759				SAMD9	0.020015	0.0625133	0	0.735294	0.323529	1.14135
	Oxidative Phosphorylation	0.249896	0.0544827	0	9.1e-05	0.771429	1.0759		Tactivated		Platelets	0.292726	0.121593	0	0.0054927	0.105263	0.525075				MCM2	0.238707	0.186921	0.25	0.245098	0.205882	1.12661
	NFkB Complex	0.12622	0.273192	0	0.0577015	0.6	1.05711		TCA cycle		Amino Acid Metabolism	0.0129102	0.016251	0.142857	0	0	0.172018				INHBA	0.393723	0.0109329	0	0.196078	0.5	1.10073
	MHC II	0.40824	0.226375	0	0.0126946	0.4	1.04731		Unfolded Protein			RF	ADB	LDA	GB	SVM	Overall				AURKA	0.260301	0.0140592	0	0.656863	0.147059	1.07828
	Monocyte	0.378822	0.104484	0	1.21e-05	0.542857	1.02618				pDC	1	1	0.00861248	0.320438	0.736842	3.06589		CD40 Activated B Cell		TYMS	0.169221	0.0190244	0	0.627451	0.254902	1.0706
	Cell Cycle	0.0993413	0.320827	0	0.00209437	0.571429	0.993691				Plasma Cell	0.71882	0	0.346815	1	0.684211	2.74985		Cell Cycle		ISG20	0.148502	0.00544287	0	0.431373	0.470588	1.05591
	Anti inflammation	0.0421603	0.0636694	0	0.00044215	0.885714	0.991986				IFN	0.683542	0.8	0.173086	0.449154	0.631579	2.73736		Erythrocytes		SP110	0.0106363	0.0455658	0	0.166667	0.794118	1.01699
	Granulocyte	0.55189	0.132475	0	0.00502483	0.257143	0.946533				Cell Cycle	0.627187	0.2	0.359023	0.0674368	0.894737	2.14838		IFN		PRPS2	0.0424347	0.205148	0	0.323529	0.441176	1.01229
	Alternative Complement Pathway	0.684407	0.252043	0	0.00326282	0	0.939712				Treg	0.77633	0	0.0188195	0.987412	0.315789	2.09835		Monocyte		TKTL1	0.203076	0.0210027	0	0.617647	0.166667	1.00839
	Classical Complement Pathway	0.273556	0.111131	0	0.0602024	0.457143	0.902032				TCA cycle	0.421586	0.6	0.182668	0.26204	0.473684	1.93998		pDC		IL16	0.068533	0.0121137	0	0.186275	0.72549	0.992411
	Cytotoxic, Activated T Cell	0.355629	0.144922	0	0.00019248	0.342857	0.8436				TNF	0.0505777	0.4	1	0.0204171	0.421053	1.89205		Plasma Cell		PTGS2	0.184055	0.0770149	0.25	0.0490196	0.431373	0.991462
	Treg	0.0758399	0.135907	0	0.00134783	0.485714	0.698808				CD40 Activated B Cell	0.596316	0.4	0.519511	0.28711	0.0526316	1.85557		TCA cycle		MCM10	0.315444	0.190505	0.125	0.117647	0.215686	0.964283
	ROS Protection	0.364339	0.155329	0	0.00653112	0.0571429	0.583342				Erythrocytes	0.338091	0	0.0886691	0.406518	0.842105	1.67538		TNF		PDPR	0.093011	0.133146	0	0.343137	0.372549	0.941843
	TNF	0.181615	0.162507	0	0.000781	0.2	0.544903				Monocyte	0.0504013	0.2	0.743305	0.00364753	0.526316	1.52367		Treg		TNFAIP2	0.149101	0.00573277	0	0.421569	0.352941	0.929344
	Dendritic Cell	0.174614	0.0659993	0	0.00237968	0.285714	0.528707				Tactivated	0.149534	0	0.0939692	0.00188472	1	1.24539				ASPM	0.150087	0	0	0.666667	0.107843	0.924597
	Platelets	0.0921532	0.0520247	0	0.00014143	0.228571	0.372891				LDG	0.406782	0.4	0.0298735	0.0251273	0.368421	1.2302				MKI67	0.179209	0.265964	0	0.27451	0.186275	0.905957
	Glycolysis	0.23418	0	0	0	0.114286	0.348466				Proinflammatory IL-1 Family	0.18269	0	0.126181	0.0410686	0.789474	1.13941				PDK4	0.22688	0.0111856	0	0.362745	0.27451	0.875321
	NLRP3 Inflammasome	0.124701	0.0824609	0	0.00058834	0.0857143	0.293465				Fatty Acid Alpha Oxidation	0.108661	0	0.0498032	0.00362172	0.947368	1.10945				SDHA	0.0516372	0.34514	0	0.127451	0.303922	0.828149
	Fatty Acid Alpha Oxidation	0	0.115533	0	0.00083496	0.142857	0.259225				MHC II	0.37878	0.2	0	0.262014	0.263158	1.10395				LGALS3BP	0.110045	0.010619	0	0.22549	0.480392	0.826547
	Fatty Acid Beta Oxidation	0.028657	0.0330003	0	0.00317991	0.0285714	0.0934086				NFkB Complex	0.0966104	0.8	0.00313004	0.0244443	0.157895	1.08208				TK1	0.108304	0.0239267	0	0.392157	0.284314	0.808701
6		LR	RF	DTREE	GB	SVM	Overall		Top 20 Features		Inflammatory_Neutrophil	0.255017	0.2	0.347668	0.046351	0.210526	1.05956				SDC4	0.121636	0.00546728	0	0.382353	0.294118	0.803574
	Plasma Cell	0.829373	1	1	1	0.2	4.02937		Anergic / Activated T cells		Granulocyte	0.0314999	0.2	0.0882663	0.00507353	0.578947	0.903787				MYBL2	0.37626	0.0322072	0	0.294118	0.0980392	0.800624
	IFN	1	0.262893	0.53208	0.319379	0.0285714	2.14292		Anti inflammation		Amino Acid Metabolism	0	0.6	0.256641	0	0	0.856641				TSPO2	0.156901	0.00686302	0	0.264706	0.343137	0.771607
	Erythrocytes	0.206949	0.450863	0.505806	0.297616	0.571429	2.03266		Apoptosis		NLRP3 Inflammasome	0.087704	0	0.129017	0.0869912	0.105263	0.408975				OGDH	0.110684	0.409562	0.125	0.00980392	0.0784314	0.733481
	Classical Complement Pathway	0.234383	0.10189	0.600759	0.00148235	0.771429	1.70994		CD40 Activated B Cell			RF	ADB	LDA	GB	SVM	Overall				PDK2	0.216833	0.0711572	0	0.313725	0.127451	0.729167
	NK Cell	0.524016	0.220622	0.127434	0.578089	0.257143	1.7073		Cell Cycle		IFN	1	1	0.315849	1	0.631579	3.94743		IFN		ADGRE2	0.1462	0.057023	0	0	0.519608	0.72283
	pDC	0.224523	0.737998	0	0.321563	0.371429	1.65551		Classical Complement Pathway		CD40 Activated B Cell	0.973279	0.571429	1	0.0625908	0.526316	3.13361		Apoptosis		SLC4A1	0.0134439	0	0	0.568627	0.117647	0.699718
	CD40 Activated B Cell	0.387779	0.358315	0	0.0558044	0.828571	1.63047		Cytotoxic, Activated T Cell		pDC	0.662669	0.714286	0	0.184407	1	2.56136		CD40 Activated B Cell		BHLHE41	0.0459645	0.00799648	0	0.637255	0	0.691216
	Pentose Phosphate Signature	0.931819	0.469446	0	0.0290818	0.171429	1.60178		Erythrocytes		TNF	0.192304	0.714286	0.809179	0.0160477	0.578947	2.31076		Cell Cycle		SSPN	0.222125	0.0204741	0	0.303922	0.137255	0.683776
	T Cell	0.346242	0.173018	0	0.0448376	0.971429	1.53553		Granulocyte		Plasma Cell	0.969406	0.285714	0.342108	0.470886	0.105263	2.17338		LDG		MN1	0.189486	0	0	0.284314	0.176471	0.65027
	Granulocyte	0.414945	0.0987975	0	0.00357885	1	1.51732		IFN		Pentose Phosphate Signature	0.53071	0.428571	0.589106	0.0887026	0.315789	1.95288		pDC		RPE	0.184609	0.0163138	0	0.0784314	0.362745	0.642099
	Cell Cycle	0.111643	0.593875	0	0.00737789	0.8	1.5129		MHC II		Cell Cycle	0.364067	0.142857	0.607966	0.00051806	0.789474	1.90488		Pentose Phosphate Signature		MGLL	0.17887	0.00810878	0	0.254902	0.196078	0.63796
	MHC II	0.523217	0.426491	0	0.146184	0.314286	1.41018		NK Cell		LDG	0.478939	0.571429	0.167054	0.651904	0	1.86933		Plasma Cell		TRAF1	0.248074	0.186956	0	0.176471	0.00980392	0.621305
	Proinflammatory IL-1 Family	0.384536	0.252178	0	0.00950108	0.742857	1.38907		pDC		Treg	0.592228	0.714286	0.0145535	0.0153178	0.473684	1.81007		TNF		PRDM1	0.080281	0.0108775	0	0.0686275	0.45098	0.610766
	ROS Protection	0.413667	0.126774	0	0.0206661	0.714286	1.27539		Pentose Phosphate Signature		Apoptosis	0.232178	0.142857	0.406362	0.0586655	0.947368	1.78743		Treg		OGDHL	0.0995766	0.0124422	0	0.401961	0.0588235	0.572803
	Cytotoxic, Activated T Cell	0.354324	0.0801682	0	0.171197	0.657143	1.26283		Plasma Cell		NFkB Complex	0.058002	0.571429	0.130147	0	0.842105	1.60168				PAICS	0.0822334	0.00518044	0	0.372549	0.0392157	0.499179
	TCA cycle	0.457225	0.233116	0	0.0279506	0.514286	1.23258		Proinflammatory IL-1 Family		NK Cell	0.228491	0.571429	0.0461592	0.0225302	0.684211	1.55282				PDP2	0.116078	0	0	0.156863	0.22549	0.498431
	Apoptosis	0.338528	0	0	0.00143308	0.857143	1.1971		ROS Protection		Inflammatory_Neutrophil	0.547216	0.142857	0.424089	0.0160926	0.421053	1.55131				LDHB	0.0201897	0.0144185	0	0.215686	0.245098	0.495393
	Anergic / Activated T cells	0.176384	0.0894394	0	4.27e-05	0.914286	1.18015		T Cell		Dendritic Cell	0.467044	0	0.0693679	0.0405011	0.894737	1.47165				MX2	0.0600342	0	0	0.0980392	0.156863	0.314936
	Anti inflammation	0.0277708	0.230375	0	0.00539116	0.885714	1.14925		Tactivated		Anti inflammation	0.510677	0	0.164049	0.224757	0.263158	1.16264				OLFM4	0.157906	0.00826564	0	0.0196078	0.0490196	0.234799
	Tactivated	0.352971	0.187666	0	6.83e-06	0.6	1.14064		TCA cycle		T Cell	0.300716	0	0.0501295	0.03543	0.736842	1.12312				PDK1	0.133931	0.0214305	0	0.0294118	0.0294118	0.214185
	LDG	0.443801	0.296352	0.13485	0.115209	0.114286	1.1045				Erythrocytes	0.341628	0.142857	0.120078	0.139766	0.368421	1.11275				TSC22D1	0.0817897	0.00484259	0	0.0588235	0.0686275	0.214083
	TNF	0.291266	0.0682321	0	1.28e-06	0.685714	1.04521				Classical Complement Pathway	0.251365	0	0.0441201	0.052708	0.210526	0.558719				NFE2	0.0428012	0.0068684	0	0.0392157	0.0882353	0.177121
	Alternative Complement Pathway	0.718363	0.27499	0	0.0315199	0	1.02487				Anergic / Activated T cells	0.0607166	0.142857	0.16369	0.00427655	0.157895	0.529435					LR	RF	ADB	KNN	NB	Overall		Top 20 Genes
	Amino Acid Metabolism	0.0104058	0.063189	0	0.00020642	0.942857	1.01666				Amino Acid Metabolism	0	0.285714	0.111243	0.0222623	0.0526316	0.471851				SDC1	1	0.823564	1	0.441176	0.735294	4.00003		ADGRE2
	Treg	0.172243	0.220563	0	0.00173722	0.485714	0.880257														FBXL2	0.310588	0.759599	0	0.852941	0.911765	2.83489		CCNB2
	Inflammatory_Neutrophil	0.320989	0.193981	0	0.0145393	0.342857	0.872367														G6PD	0.301836	1	0	0.5	0.833333	2.63517		CD38
	Monocyte	0.45467	0.0573707	0	3.27e-07	0.285714	0.797756														MCM10	0.500538	0.221185	0.333333	0.823529	0.666667	2.54525		CXCL1
	Glycolysis	0.346148	0.019273	0	0.0160022	0.4	0.781423														CD38	0.335522	0.0563424	0.333333	0.803922	0.990196	2.51932		CXCL8
	Unfolded Protein	0	0.308433	0	0.032508	0.428571	0.769513														EGR1	0.576645	0.485751	0.333333	0.333333	0.754902	2.48396		EGR1
	Dendritic Cell	0.0299698	0.0955068	0	0.00633285	0.628571	0.760381														OGDH	0.098656	0.352016	0	0.901961	0.95098	2.30361		FBXL2
	Fatty Acid Alpha Oxidation	0.0873188	0.0670848	0	0.0013589	0.542857	0.69862														MPO	0.485521	0.00553706	0	0.941176	0.852941	2.28518		FCER2
	Fatty Acid Beta Oxidation	0.0490515	0.1262	0	0.0217815	0.457143	0.654176														MCM2	0.25258	0.0347399	0.166667	0.980392	0.803922	2.2383		G6PD
	NLRP3 Inflammasome	0.173069	0.150811	0	0.091295	0.228571	0.643747														NFE2	0.0708989	0.0969906	0.166667	0.921569	0.941176	2.1973		GMIP
	Oxidative Phosphorylation	0.311523	0.0208813	0	0.00734987	0.0571429	0.396897														FCER2	0.303513	0.0204271	0.166667	0.843137	0.862745	2.19649		MCM10
	Platelets	0.21858	0.0825514	0	0.0001449	0.0857143	0.386991														MKI67	0.186874	0.19484	0	0.960784	0.823529	2.16603		MCM2
	NFkB Complex	0.111937	0.074466	0	0	0.142857	0.32926														CXCL1	0.257621	0.0118263	0.333333	0.54902	0.960784	2.11258		MGLL
7		LR	RF	LDA	GB	SVM	Overall		Top 20 Features												ADGRE2	0.0937588	0.113772	0	0.882353	1	2.08988		MKI67
	Plasma Cell	0.955425	1	0.432395	1	0.971429	4.35925		Amino Acid Metabolism												PTTG1	0.484932	0.750972	0.166667	0.352941	0.333333	2.08885		MPO
	Treg	0.372148	0.662677	0.0536285	0.826296	0.685714	2.60046		Anergic / Activated T cells												CCNB2	0.192876	0.265398	0.333333	0.72549	0.539216	2.05631		NFE2
	CD40 Activated B Cell	0.439291	0.437134	0.45628	0.0276339	0.8	2.16034		CD40 Activated B Cell												OGDHL	0.141383	0.00102255	0	0.892157	0.980392	2.01495		OGDH
	ROS Protection	0.530579	0.237647	0.283847	0.122864	0.828571	2.00351		Cell Cycle												MGLL	0.22265	0.00651657	0	0.970588	0.813725	2.01348		OGDHL
	TNF	0.274576	0.168662	1	0.00109245	0.485714	1.93005		Erythrocytes												GMIP	0.160489	0.254926	0.5	0.196078	0.882353	1.99385		PTTG1
	Granulocyte	0.416483	0.207118	0.222255	0.00030385	1	1.84616		Granulocyte												CXCL8	0.247805	0.00380664	0	0.794118	0.931373	1.9771		SDC1
	Monocyte	0.50212	0.0608231	0.928446	0.00013523	0.257143	1.74867		IFN												CLEC4C	0.594945	0.0313334	0	0.911765	0.411765	1.94981
	Inflammatory_Neutrophil	0.384559	0.149743	0.834973	0.0202842	0.342857	1.73242		Inflammatory_Neutrophil												AMPD3	0.328769	0.346242	0.5	0.284314	0.45098	1.91031
	T Cell	0.497135	0.260386	0.0868605	0.213586	0.6	1.65797		LDG												SDHAF3	0.421576	0.056219	0.5	0.470588	0.441176	1.88956
	Pentose Phosphate Signature	1	0.231458	0.251053	0.0413732	0.114286	1.63817		MHC II												CDC20	0.0544045	0.427093	0	0.764706	0.480392	1.7266
	Proinflammatory IL-1 Family	0.418525	0.283961	0.122897	0.0598387	0.742857	1.62808		Monocyte												CEP55	0.19754	0.392309	0	0.95098	0.176471	1.7173
	IFN	0.851492	0.292807	0.0402126	0.286938	0.0571429	1.52859		pDC												AURKA	0.197476	0	0	0.862745	0.647059	1.70728
	TCA cycle	0.469365	0.259788	0.0285148	0.0500903	0.714286	1.52204		Pentose Phosphate Signature												PTGS2	0.234121	0.0846486	0.166667	0.343137	0.872549	1.70112
	Amino Acid Metabolism	0.0238003	0.133248	0.417854	1.52e-06	0.942857	1.51776		Plasma Cell												SDHC	0.354673	0.472147	0.333333	0.245098	0.284314	1.68957
	Cell Cycle	0.03255	0.368477	0.312286	0.0201852	0.771429	1.50493		Proinflammatory IL-1 Family												GBP4	0.703239	0.0363039	0	0.166667	0.764706	1.67092
	MHC II	0.461359	0.467074	0.0746379	0.213289	0.285714	1.50207		ROS Protection												IL18	0.285985	0.0892292	0.333333	0.77451	0.166667	1.64972
	pDC	0.279034	0.810818	0.0538062	0.158157	0.142857	1.44467		T Cell												SDHA	0.0669931	0.464848	0	0.460784	0.607843	1.60047
	LDG	0.464949	0.328455	0.0315039	0.284017	0.314286	1.42321		TCA cycle												IDO1	0.138618	0.00651559	0	0.745098	0.705882	1.59611
	Anergic / Activated T cells	0.267439	0.17448	0.0329053	0.00148465	0.914286	1.39059		TNF												CASP10	0.20556	0.0385375	0	0.754902	0.568627	1.56763
	Erythrocytes	0.16845	0.366096	0.188248	0.100098	0.542857	1.36575		Treg												DAB2	0.0125123	0.0276497	0	0.588235	0.921569	1.54997
	Classical Complement Pathway	0.586246	0.0135019	0.0331747	0.0008277	0.657143	1.29089														IFITM3	0.479513	0.12538	0	0.715686	0.22549	1.54607
	Apoptosis	0.424108	0	0	0.00036074	0.857143	1.28161														ASAP1	0.159914	0.584953	0	0.568627	0.215686	1.52918
	Anti inflammation	0.0240061	0.238975	0.11779	0.00600741	0.885714	1.27249														CDKN3	0.235204	0.0167716	0.5	0.372549	0.392157	1.51668
	Cytotoxic, Activated T Cell	0.285963	0.0983332	0.154084	0.0148852	0.628571	1.18184														GYPA	0.637444	0.0513451	0	0.107843	0.686275	1.48291
	Alternative Complement Pathway	0.785087	0.168329	0.140138	0.0464521	0	1.14001														PDK2	0.319262	0.0899935	0	0.686275	0.372549	1.46808
	Unfolded Protein	0.0744885	0.366244	0.183836	0.0807414	0.428571	1.13388														SDC4	0.0293117	0.0103385	0	0.45098	0.970588	1.46122
	Tactivated	0.487408	0.300516	0.0115326	0.0181939	0.2	1.01765														TRAF1	0.327934	0.121819	0.166667	0.607843	0.235294	1.45956
	Dendritic Cell	0.124241	0.150432	0.0117447	0.0691519	0.571429	0.926999														VEGFA	0.174827	0.0465054	0.166667	1	0.0686275	1.45663
	NK Cell	0.477523	0.270776	0.0542628	0.0485931	0.0285714	0.879727														CAMP	0.532626	0	0.166667	0.156863	0.598039	1.4542
	Glycolysis	0.278861	0.0454175	0.116423	0.0118938	0.4	0.852595														PDP2	0.0546999	0.0172405	0	0.833333	0.529412	1.43469
	Oxidative Phosphorylation	0.233289	0.117674	0.239688	0	0.171429	0.762079														TSC22D1	0.160783	0.0336173	0.166667	0.637255	0.431373	1.42969
	Fatty Acid Alpha Oxidation	0.0299922	0.172623	0.0363618	0.00696617	0.514286	0.760229														CEACAM6	0.231939	0	0	0.421569	0.745098	1.39861
	NLRP3 Inflammasome	0.152442	0.0246457	0.0614477	0.0637126	0.371429	0.673676														PKM	0.112974	0.034474	0	0.656863	0.578431	1.38274
	Fatty Acid Beta Oxidation	0	0.0405594	0.0382657	0.00338177	0.457143	0.53935														WEE1	0.0140817	0.0246252	0	0.627451	0.696078	1.36224
	NFkB Complex	0.00058917	0.145649	0.0823783	0.0488198	0.228571	0.506008														RPGR	0.282066	0.08226	0	0.401961	0.588235	1.35452
	Platelets	0.0704448	0.0961173	0.112379	0.00031433	0.0857143	0.36497														H6PD	0.1449	0.415306	0	0.27451	0.519608	1.35432
8		LR	RF	ADB	LDA	SVM	Overall		Top 20 Features												ASPM	0.144416	0.0279886	0	0.480392	0.676471	1.32927
	Plasma Cell	0.677509	1	0.222222	0.488662	0.8	3.18839		Amino Acid Metabolism												RPE	0.122537	0.0147984	0	0.392157	0.784314	1.31381
	IFN	1	0.573408	1	0.109496	0.142857	2.82576		Anergic / Activated T cells												SLC4A1	0	0	0	0.990196	0.294118	1.28431
	TNF	0.168779	0.0579955	0.222222	0.944262	0.685714	2.07897		Anti inflammation												INHBA	0.385353	0.0165632	0	0.784314	0.0882353	1.27447
	CD40 Activated B Cell	0.215962	0.440143	0.111111	0.553168	0.714286	2.03467		Apoptosis												CS	0.199975	0.383149	0	0.529412	0.156863	1.2694
	Pentose Phosphate Signature	0.602174	0.212858	0.222222	0.221359	0.771429	2.03004		CD40 Activated B Cell												CALD1	0.0267921	0	0	0.617647	0.617647	1.26209
	pDC	0.179666	0.677354	0.444444	0.0492864	0.514286	1.86504		Cell Cycle												GP1BA	0.363298	0.0923225	0	0.254902	0.54902	1.25954
	Inflammatory_Neutrophil	0.293165	0.204068	0	1	0.257143	1.75438		Cytotoxic, Activated T Cell												HOMER2	0.0466393	0	0	0.411765	0.77451	1.23291
	Cell Cycle	0.0230231	0.406122	0.222222	0.401287	0.657143	1.7098		Erythrocytes												OLFM4	0.214145	0	0	0.872549	0.127451	1.21415
	Amino Acid Metabolism	0.0432529	0.0567289	0.222222	0.424766	0.942857	1.68983		IFN												GINS2	0.197905	0.0147691	0	0.0294118	0.892157	1.13424
	LDG	0.44158	0.26701	0.111111	0.00460413	0.828571	1.65288		Inflammatory_Neutrophil												RFTN1	0.0464671	0	0	0.264706	0.794118	1.10529
	Monocyte	0.304328	0.0234616	0	0.967959	0.285714	1.58146		LDG												TK1	0.183709	0.0151887	0	0.539216	0.362745	1.10086
	Cytotoxic, Activated T Cell	0.436019	0.0712148	0.333333	0.238834	0.457143	1.53654		MHC II												PDPR	0.0678867	0.135637	0	0.647059	0.245098	1.09568
	Apoptosis	0.308212	0.144643	0	0.146925	0.857143	1.45692		Monocyte												HP	0.0746358	0	0	0.558824	0.460784	1.09424
	MHC II	0.309476	0.083739	0.222222	0.0690855	0.742857	1.42738		pDC												EREG	0.268855	0	0	0.735294	0.0784314	1.08258
	Erythrocytes	0.235407	0.42039	0.222222	0.195086	0.314286	1.38739		Pentose Phosphate Signature												MX2	0.00346768	0.0173112	0	0.931373	0.117647	1.0698
	ROS Protection	0.321651	0.103309	0.222222	0.309453	0.4	1.35664		Plasma Cell												IDH1	0.114307	0.0949126	0	0.127451	0.72549	1.06216
	Platelets	0.144632	0.10088	0	0.127275	0.971429	1.34422		Platelets												TYMS	0.00372766	0.0317964	0	0.666667	0.352941	1.05513
	Tactivated	0.179966	0.089894	0.333333	0.0588102	0.6	1.262		ROS Protection												IFITM1	0.463581	0.304728	0.166667	0.117647	0	1.05262
	Anti inflammation	0.111403	0.0744247	0	0.183601	0.885714	1.25514		Tactivated												DLAT	0.178524	0.0180429	0	0.813725	0.0392157	1.04951
	Anergic / Activated T cells	0.0872294	0.0512988	0	0.0761707	0.914286	1.12898		TNF												PDK1	0.0916621	0.0151631	0.166667	0.0588235	0.715686	1.048
	Granulocyte	0.390536	0.0651846	0.111111	0.269959	0.228571	1.06536														SSPN	0.267473	0.00528016	0.333333	0.235294	0.205882	1.04726
	Oxidative Phosphorylation	0.210335	0.0693756	0.111111	0.30243	0.371429	1.06468														BCL2A1	0.276766	0	0	0.0882353	0.637255	1.00226
	Alternative Complement Pathway	0.592254	0.279134	0	0.191078	0	1.06247														SP110	0.0474417	0.0162365	0	0.509804	0.421569	0.995051
	Fatty Acid Alpha Oxidation	0	0.0118522	0	0.0448153	1	1.05667														PDK4	0.228006	0.00442814	0.333333	0.0196078	0.401961	0.987336
	NFkB Complex	0.117333	0.11206	0.111111	0.0773874	0.628571	1.04646														GFI1B	0.0282624	0.017643	0	0.0392157	0.901961	0.987082
	TCA cycle	0.403438	0.143619	0.333333	0.0411997	0.0571429	0.978733														TNFRSF17	0.211353	0.0731713	0	0.598039	0.0980392	0.980602
	Unfolded Protein	0.0947686	0.148338	0	0.282465	0.428571	0.954143														IL16	0.0806869	0	0	0.696078	0.196078	0.972844
	Dendritic Cell	0.128051	0.236753	0.222222	0	0.342857	0.929883														BHLHE41	0.179081	0.00380664	0	0.519608	0.264706	0.967202
	NLRP3 Inflammasome	0.223511	0.0310554	0	0.113871	0.542857	0.911294														SERPIND1	0.199292	0.122913	0	0.490196	0.147059	0.95946
	NK Cell	0.222656	0.025317	0.333333	0.0508447	0.171429	0.80358														PRPS2	0.0210595	0.143969	0	0.323529	0.470588	0.959146
	Proinflammatory IL-1 Family	0.211003	0.0421247	0.222222	0.127904	0.2	0.803253														BRCA1	0.092367	0.0322393	0	0.205882	0.627451	0.95794
	Classical Complement Pathway	0.0481568	0.0442364	0	0.0218457	0.571429	0.685667														MN1	0.103935	0	0	0.00980392	0.843137	0.956876
	Treg	0.0890686	0.0187619	0	0.0502242	0.485714	0.643769														E2F3	0.129347	0.010447	0	0.705882	0.0588235	0.9045
	T Cell	0.250222	0.176873	0	0.10182	0.0857143	0.61463														IGHMBP2	0.158029	0.0127129	0.166667	0.147059	0.382353	0.86682
	Glycolysis	0.176926	0.0512698	0	0.16056	0.114286	0.503042														PRDM1	0.038351	0	0	0.313725	0.490196	0.842273
	Fatty Acid Beta Oxidation	0.0844392	0	0	0.133208	0.0285714	0.246218														CCNB1	0.0713266	0.0178757	0.166667	0	0.558824	0.814693
9		RF	DTREE	ADB	LDA	SVM	Overall		Top 20 Features												MYBL2	0.438392	0.111284	0.166667	0.0686275	0.0294118	0.814382
	Plasma Cell	1	1	0.333333	0.428094	0.914286	3.67571		Amino Acid Metabolism												PAICS	0.0934872	0.011188	0	0.0490196	0.656863	0.810558
	CD40 Activated B Cell	0.427267	0	0.833333	0.443058	0.714286	2.41794		CD40 Activated B Cell												DUSP4	0.0653118	0.00384342	0	0.676471	0.0490196	0.794645
	IFN	0.504926	0.837151	0.666667	0.0402833	0.314286	2.36331		Cell Cycle												RBKS	0.0881074	0.036137	0	0.362745	0.303922	0.790911
	Inflammatory_Neutrophil	0.269145	0	0.166667	0.882944	0.828571	2.14733		Erythrocytes												SAMD9	0.0578503	0.0691254	0	0.431373	0.186275	0.744623
	TCA cycle	0.117482	0.242405	1	0.00928123	0.685714	2.05488		Fatty Acid Alpha Oxidation												LGALS3BP	0.105779	0.00553323	0	0.303922	0.323529	0.738763
	Monocyte	0.0512685	0	0	0.950318	0.8	1.80159		Granulocyte												TKTL1	0.187767	0.0158038	0	0.215686	0.313725	0.732983
	pDC	0.521804	0	0.833333	0.0354023	0.257143	1.64768		IFN												HMMR	0.0315589	0.0110498	0	0.176471	0.509804	0.728883
	Erythrocytes	0.376028	0.772829	0.166667	0.182194	0.114286	1.612		Inflammatory_Neutrophil												TSPO2	0.0589412	0	0	0.294118	0.343137	0.696196
	TNF	0.086532	0	0	1	0.514286	1.60082		LDG												TNFAIP2	0.0935687	0	0	0.578431	0.0196078	0.691608
	NFkB Complex	0.133331	0	0.333333	0.0738792	1	1.54054		MHC II												IFITM2	0.0494652	0.0341583	0	0.0980392	0.5	0.681663
	MHC II	0.15455	0	0.333333	0.0519053	0.885714	1.4255		Monocyte												RNASE3	0.00613755	0.0110591	0	0.382353	0.137255	0.536805
	LDG	0.238255	0	0.5	0	0.571429	1.30968		NFkB Complex												LDHB	0.130011	0.0173639	0	0.0784314	0.27451	0.500316
	Amino Acid Metabolism	0.0941234	0	0.166667	0.40489	0.628571	1.29425		NLRP3 Inflammasome												ISG20	0.198208	0.0516688	0	0.137255	0.107843	0.494975
	Proinflammatory IL-1 Family	0.0584486	0	0.166667	0.1457	0.857143	1.22796		pDC												TNFAIP3	0.0237249	0	0	0.186275	0.254902	0.464901
	Treg	0.172807	0	0	0.0222814	0.971429	1.16652		Plasma Cell												THEMIS2	0.0818448	0.0345111	0	0.22549	0.00980392	0.35165
	Fatty Acid Alpha Oxidation	0.128285	0	0	0.039697	0.942857	1.11084		Proinflammatory IL-1 Family													LR	RF	ADB	GB	NB	Overall		Top 20 Genes
	Cell Cycle	0.266624	0	0.166667	0.322061	0.342857	1.09821		Tactivated												SDC1	1	0.56974	1	0.1234	0.539216	3.23235		ASAP1
	Tactivated	0.0693206	0	0.5	0.0422411	0.485714	1.09728		TCA cycle												EGR1	0.52683	0.453421	0.375	0.947976	0.676471	2.9797		CAMP
	Granulocyte	0.0706669	0	0	0.249812	0.771429	1.09191		TNF												G6PD	0.26641	1	0	1	0.637255	2.90367		CDKN3
	NLRP3 Inflammasome	0.0769305	0.156312	0	0.0869723	0.742857	1.06307		Treg												ASAP1	0.102278	0.696337	0.25	0.746467	0.343137	2.13822		CS
	ROS Protection	0.158037	0	0.5	0.314895	0.0571429	1.03008														MCM10	0.298943	0.240543	0.375	0	0.892157	1.80664		EGR1
	NK Cell	0.225706	0.202425	0.166667	0.0566627	0.371429	1.02289														SDHAF3	0.424167	0.0604417	0.25	0.0164309	0.990196	1.74124		FBXL2
	Anti inflammation	0.132136	0	0	0.155418	0.657143	0.944697														IFITM1	0.503344	0.42206	0	0	0.794118	1.71952		G6PD
	Classical Complement Pathway	0.157741	0	0.166667	0.0605177	0.542857	0.927782														FBXL2	0.26333	0.718862	0	0	0.656863	1.63905		GBP4
	Apoptosis	0.213749	0	0.166667	0.0445594	0.4	0.824975														H6PD	0.118062	0.44371	0	0	0.941176	1.50295		GMIP
	Unfolded Protein	0.242051	0	0	0.140408	0.428571	0.81103														CAMP	0.455282	0.0412517	0.125	0	0.823529	1.44506		GP1BA
	Oxidative Phosphorylation	0.107888	0	0.166667	0.204279	0.285714	0.764548														PTTG1	0.520729	0.625274	0.25	2.87e-08	0.0490196	1.44502		GYPA
	Platelets	0.0313797	0	0	0.117648	0.6	0.749028														CDKN3	0.219144	0.0568962	0.5	1.45e-05	0.666667	1.44272		H6PD
	Anergic / Activated T cells	0.0666454	0	0.166667	0.0374924	0.457143	0.727947														GYPA	0.678157	0.035361	0.125	0.00042732	0.588235	1.42718		IFITM1
	Pentose Phosphate Signature	0.185509	0	0.166667	0.260544	0.0857143	0.698434														GMIP	0.130908	0.301015	0.375	7.05e-07	0.598039	1.40496		IL18
	T Cell	0.201102	0	0.166667	0.0958676	0.2	0.663637														GP1BA	0.2673	0.104109	0	0	0.980392	1.3518		INHBA
	Cytotoxic, Activated T Cell	0.0703123	0	0.166667	0.172373	0.171429	0.580781														SDHC	0.294004	0.418032	0.125	0	0.490196	1.32723		MCM10
	Glycolysis	0.0445265	0.151503	0	0.0925204	0.228571	0.517121														IL18	0.297845	0.11644	0.125	0.00600356	0.764706	1.30999		PTTG1
	Fatty Acid Beta Oxidation	0	0	0.333333	0.0196411	0.0285714	0.381546														INHBA	0.34939	0.0232665	0	0.0250449	0.882353	1.28005		SDC1
	Alternative Complement Pathway	0.182907	0	0	0.141258	0	0.324165														CS	0.144455	0.284742	0	7.08e-09	0.843137	1.27233		SDHAF3
	Dendritic Cell	0.115965	0	0	0.00197114	0.142857	0.260794														GBP4	0.594116	0.043196	0	0.00015694	0.627451	1.26492		SDHC
10		RF	DTREE	ADB	GB	SVM	Overall		Top 20 Features												FCER2	0.305046	0.0308121	0.25	0	0.647059	1.23292
	Plasma Cell	1	1	0.333333	1	0.114286	3.44762		Amino Acid Metabolism												MCM2	0.191244	0.124457	0	0.00142614	0.901961	1.21909
	IFN	0.493211	0.572859	0.666667	0.588068	0.457143	2.77795		Anergic / Activated T cells												IFITM3	0.31004	0.0290749	0	0	0.872549	1.21166
	Erythrocytes	0.340202	0.502868	0.333333	0.316587	0.657143	2.15013		Anti inflammation												CCNB2	0.208732	0.0827313	0.5	0	0.382353	1.17382
	CD40 Activated B Cell	0.345423	0	0.666667	0.0102425	0.828571	1.8509		Apoptosis												MPO	0.386572	0.0301648	0.25	6.67e-10	0.5	1.16674
	Pentose Phosphate Signature	0.261126	0.140502	1	0.0156572	0.257143	1.67443		CD40 Activated B Cell												EREG	0.158084	0	0	0	0.970588	1.12867
	pDC	0.626301	0.133648	0.666667	0.182001	0.0571429	1.66576		Cell Cycle												IDH1	0.176105	0.133346	0	2.19e-05	0.813725	1.1232
	NK Cell	0.215472	0	0.833333	0.182971	0.342857	1.57463		Classical Complement Pathway												MKI67	0.128957	0.0724999	0	0	0.921569	1.12303
	Inflammatory_Neutrophil	0.276559	0	0.166667	0.025194	1	1.46842		Dendritic Cell												DUSP4	0.129766	0	0	0	0.960784	1.09055
	T Cell	0.264316	0	0.166667	0.0368257	0.971429	1.43924		Erythrocytes												CXCL8	0.186722	0.0149653	0	0.0246128	0.862745	1.08904
	Cell Cycle	0.240622	0	0.333333	2.19e-05	0.8	1.37398		IFN												AURKA	0.19241	0.00389963	0	0	0.852941	1.04925
	Anergic / Activated T cells	0.20986	0	0.166667	0.00026107	0.914286	1.29107		Inflammatory_Neutrophil												WEE1	0.0469099	0	0	0	1	1.04691
	Treg	0.363829	0	0.333333	0.00197134	0.485714	1.18485		LDG												AMPD3	0.262381	0.385488	0.125	0.00477609	0.254902	1.03255
	Amino Acid Metabolism	0.0651573	0.129694	0	0.0253755	0.942857	1.16308		NFkB Complex												HP	0.111613	0	0	0	0.911765	1.02338
	Anti inflammation	0.105037	0	0.166667	2.04e-05	0.885714	1.15744		NK Cell												IDO1	0.0553135	0.00161763	0.125	0	0.803922	0.985853
	Dendritic Cell	0.225823	0	0.166667	0.00160077	0.714286	1.10838		pDC												DAB2	0.0239749	0.0097988	0	0	0.95098	0.984754
	NFkB Complex	0.126351	0	0.5	0.0525875	0.371429	1.05037		Pentose Phosphate Signature												CLEC4C	0.472344	0.0693624	0.125	0.225076	0.0882353	0.980018
	Apoptosis	0.0189458	0	0.166667	0.00577822	0.857143	1.04853		Plasma Cell												VEGFA	0.211134	0.0666877	0.125	0.0166952	0.558824	0.97834
	Classical Complement Pathway	0.0409483	0.224162	0	1.93e-05	0.771429	1.03656		T Cell												HOMER2	0.0238118	0	0	0	0.931373	0.955184
	TNF	0.145249	0	0.333333	0.00020637	0.514286	0.993075		TNF												MGLL	0.210394	0	0	0	0.72549	0.935885
	LDG	0.296348	0	0.333333	0.1246	0.228571	0.982853		Treg												CD38	0.328945	0.0566372	0	0.150348	0.392157	0.928087
	Cytotoxic, Activated T Cell	0.106066	0	0	0.112486	0.742857	0.961409														IGHMBP2	0.138694	0.00415961	0	0	0.77451	0.917363
	Granulocyte	0.206332	0	0.166667	0.0366259	0.542857	0.952482														CASP10	0.129625	0.057604	0	0	0.715686	0.902916
	TCA cycle	0.261744	0	0.166667	0.296136	0.0857143	0.810261														HMMR	0.0597409	0	0	0	0.833333	0.893074
	Tactivated	0.104286	0	0	7.58e-05	0.685714	0.790076														ISG20	0.123722	0	0	0	0.754902	0.878624
	Fatty Acid Beta Oxidation	0.077595	0	0	0.0331415	0.6	0.710737														E2F3	0.140487	0.0351241	0	3.52e-10	0.686275	0.861885
	Fatty Acid Alpha Oxidation	0.0805186	0	0	0.00018588	0.628571	0.709276														IFITM2	0.0514068	0.00993684	0	0	0.784314	0.845657
	Oxidative Phosphorylation	0.15854	0	0.166667	0.00022984	0.285714	0.611151														DLAT	0.121589	0.0279426	0	7.81e-08	0.696078	0.845611
	Glycolysis	0.036846	0	0	1.19e-05	0.571429	0.608287														LDHB	0.0530426	0.0266506	0	0	0.745098	0.824791
	Alternative Complement Pathway	0.177184	0.248647	0.166667	1.97e-07	0	0.592498														TK1	0.225142	0.0273132	0.125	2.12e-07	0.431373	0.808828
	Unfolded Protein	0.155251	0	0	0.00413272	0.428571	0.587955														SDHA	0.0308104	0.26408	0	2.34e-06	0.509804	0.804696
	ROS Protection	0.185183	0	0.166667	0.0275831	0.142857	0.52229														LGALS3BP	0.0401481	0.00500585	0	1.94e-08	0.735294	0.780448
	Proinflammatory IL-1 Family	0.102203	0	0.166667	0.00011464	0.171429	0.440412														TNFRSF17	0.256646	0.169962	0	0	0.352941	0.77955
	Monocyte	0	0	0	3.01e-06	0.4	0.400003														SSPN	0.281234	0.0288558	0	1.05e-06	0.45098	0.761071
	NLRP3 Inflammasome	0.028607	0	0	2.63e-06	0.314286	0.342895														CDC20	0.0157744	0.31445	0	0	0.421569	0.751793
	Platelets	0.0863148	0	0	0	0.2	0.286315														CALD1	0.0363996	0.00819771	0	0	0.705882	0.75048
	MHC II	0.14452	0	0	0.00014663	0.0285714	0.173238														CXCL1	0.263951	0.0453217	0.125	0.00010491	0.27451	0.708887
																					GINS2	0.0831484	0.0128531	0	0	0.607843	0.703845
																					TSC22D1	0.133464	0.00448094	0.25	0	0.313725	0.70167
																					IL16	0.0624276	0.030474	0	1.16e-07	0.578431	0.671333
																					CEACAM6	0.120894	0.00970826	0	0	0.529412	0.660014
																					SERPIND1	0.151174	0.0271999	0	0	0.480392	0.658766
																					GFI1B	0	0.0215054	0	0	0.617647	0.639153
																					MYBL2	0.356382	0.0207847	0	0	0.215686	0.592852
																					SDC4	0.04558	0.0265184	0	0	0.519608	0.591706
																					MX2	0.0236198	0.0130653	0	0	0.54902	0.585705
																					MN1	0.0131936	0	0	2.14e-05	0.568627	0.581842
																					TKTL1	0.141716	0.0235354	0	0.00010484	0.411765	0.577121
																					TRAF1	0.227324	0.0165886	0	0	0.323529	0.567442
																					RPGR	0.249555	0.0672799	0	0	0.245098	0.561933
																					BRCA1	0.155562	0.0719782	0	2.12e-07	0.333333	0.560874
																					BCL2A1	0.257095	0	0	4.71e-05	0.294118	0.55126
																					THEMIS2	0.0759546	0.0197366	0	0.0055639	0.441176	0.542432
																					BHLHE41	0.115053	0.0157226	0	0	0.401961	0.532736
																					PTGS2	0.160678	0.117744	0.125	0.0696123	0.0588235	0.531857
																					TNFAIP2	0.101259	0.0348313	0	7.74e-05	0.372549	0.508716
																					SLC4A1	0.0248839	0	0	0	0.470588	0.495472
																					OGDH	0.0707483	0.0848575	0.125	0	0.196078	0.476684
																					SP110	0.00457229	0.00394704	0	0	0.460784	0.469304
																					PKM	0.13828	0.0582063	0.125	8.34e-06	0.0980392	0.419534
																					PDK4	0.167404	0.0231776	0	1.12e-17	0.22549	0.416072
																					RPE	0.174798	0.00502981	0	0	0.235294	0.415122
																					TSPO2	0.110378	0	0	0	0.303922	0.4143
																					CEP55	0.0792423	0.32021	0	0	0.00980392	0.409257
																					PDK2	0.200886	0.063639	0	1.38e-16	0.137255	0.40178
																					TNFAIP3	0.0339658	0	0	4.72e-07	0.362745	0.396711
																					NFE2	0.0767842	0.109186	0	0	0.205882	0.391852
																					OLFM4	0.181547	0.00502127	0	0	0.166667	0.353235
																					SAMD9	0.0105387	0.0566552	0	0.00319301	0.264706	0.335093
																					TYMS	0.0312243	0.00541074	0	0.00443584	0.284314	0.325385
																					OGDHL	0.146628	0	0	1.43e-09	0.176471	0.323098
																					PRPS2	0.0203957	0.194626	0	1.49e-05	0.0686275	0.283664
																					ASPM	0.0897885	0	0	0	0.186275	0.276063
																					PDK1	0.114693	0.0103181	0	0	0.147059	0.27207
																					PDP2	0.12027	0	0	0	0.127451	0.247721
																					PAICS	0.0545095	0	0	0.0314256	0.156863	0.242798
																					PDPR	0.0704877	0.0277726	0	0.0201677	0.107843	0.226271
																					CCNB1	0.0466239	0.122557	0	0	0	0.169181
																					ADGRE2	0.0598701	0.0877277	0	6.39e-08	0.0196078	0.167206
																					PRDM1	0.053631	0.0263273	0	0	0.0784314	0.15839
																					RNASE3	0.0248171	0.0148587	0	4.79e-16	0.117647	0.157323
																					RFTN1	0.10146	0	0	0	0.0294118	0.130871
																					RBKS	0.0212538	0.0131608	0	0	0.0392157	0.0736303
																						LR	RF	GB	KNN	NB	Overall		Top 20 Genes
																					EGR1	0.51264	0.487502	1	0.960784	0.627451	3.58838		ASAP1
																					G6PD	0.284536	1	0.771919	0.921569	0.558824	3.53685		AURKA
																					FBXL2	0.298682	0.531108	7.29e-05	0.941176	0.970588	2.74163		CCNB1
																					SDC1	1	0.712199	1.9e-07	0.323529	0.5	2.53573		CDC20
																					IFITM1	0.590463	0.555645	0	0.784314	0.578431	2.50885		CS
																					CS	0.195777	0.392666	0	0.990196	0.705882	2.28452		CXCL8
																					GYPA	0.64364	0.0744548	0	0.862745	0.686275	2.26711		DLAT
																					PTTG1	0.419276	0.40881	0	0.431373	0.990196	2.24966		EGR1
																					ASAP1	0.145643	0.542445	0.00033482	0.696078	0.77451	2.15901		EREG
																					GBP4	0.684684	0.00994554	0	0.911765	0.539216	2.14561		FBXL2
																					EREG	0.1508	0	0	0.95098	0.980392	2.08217		FCER2
																					H6PD	0.164404	0.515491	0	0.852941	0.529412	2.06225		G6PD
																					FCER2	0.302412	0	0	0.931373	0.647059	1.88084		GBP4
																					AURKA	0.240768	0	0.00747109	0.676471	0.931373	1.85608		GFI1B
																					GFI1B	0	0	0	0.901961	0.921569	1.82353		GYPA
																					TNFAIP3	0.0254895	0.00463165	0	0.980392	0.794118	1.80463		H6PD
																					CDC20	0.00817174	0.288503	0	0.568627	0.852941	1.71824		IFITM1
																					CCNB1	0.0546935	0.0675259	0	0.607843	0.960784	1.69085		PTTG1
																					CXCL8	0.230161	0.0173513	0.00115228	0.598039	0.823529	1.67023		SDC1
																					DLAT	0.171812	0.00434804	0	0.745098	0.745098	1.66636		TNFAIP3
																					CD38	0.362893	0.0890803	0.226892	0.578431	0.392157	1.64945
																					IFITM3	0.466583	0.0906456	0	0.764706	0.303922	1.62586
																					MCM10	0.347832	0.197816	0.0112852	0.196078	0.872549	1.62556
																					TKTL1	0.193539	0.0296161	0	0.509804	0.892157	1.62512
																					SDHAF3	0.425242	0.0441219	2.66e-05	0.294118	0.843137	1.60665
																					CLEC4C	0.544278	0.0541112	0.168153	0.529412	0.294118	1.59007
																					E2F3	0.161735	0.0335023	0	0.970588	0.421569	1.58739
																					AMPD3	0.306261	0.329827	0	0.705882	0.245098	1.58707
																					VEGFA	0.190652	0.0202511	0.00120254	0.627451	0.696078	1.53563
																					IDO1	0.17052	0.0326447	2.97e-10	0.794118	0.509804	1.50709
																					IFITM2	0.0613702	0	0	0.77451	0.666667	1.50255
																					TSC22D1	0.145854	0.0214709	0	0.519608	0.803922	1.49085
																					IDH1	0.150442	0.0688108	0	0.813725	0.45098	1.48396
																					CEACAM6	0.160014	0.00493395	0	0.54902	0.764706	1.47867
																					CAMP	0.530664	0	0	0.617647	0.323529	1.47184
																					GMIP	0.159064	0.249635	0	0.882353	0.166667	1.45772
																					HP	0.109562	0.00397535	0	0.823529	0.519608	1.45667
																					GP1BA	0.309953	0.0805033	0	0.872549	0.186275	1.44928
																					OGDH	0.107521	0.308058	3.3e-06	0.0980392	0.911765	1.42539
																					RPE	0.150517	0.0386068	0.0171439	0.245098	0.95098	1.40235
																					SDHC	0.342784	0.549043	2.79e-09	0.284314	0.22549	1.40163
																					SLC4A1	0.00798412	0.00372468	0	0.735294	0.637255	1.38426
																					SDHA	0.0526903	0.402427	0	0.313725	0.568627	1.33747
																					HOMER2	0.0188198	0.0121951	0	0.833333	0.470588	1.33494
																					HMMR	0.0433295	0.0144355	0	0.843137	0.431373	1.33227
																					TK1	0.155492	0.0272337	2.2e-05	0.803922	0.343137	1.32981
																					MYBL2	0.333892	0.0329125	8.07e-10	0.117647	0.833333	1.31778
																					BCL2A1	0.253122	0.0128322	0.00016122	0.666667	0.372549	1.30533
																					OGDHL	0.209444	0.00683854	0	0.0882353	1	1.30452
																					CDKN3	0.266785	0.0923217	9.66e-06	0.558824	0.382353	1.30029
																					THEMIS2	0.0724944	0.0417312	0.00258521	0.392157	0.784314	1.29328
																					LDHB	0.102278	0.0128656	0.00176259	0.215686	0.941176	1.27377
																					PRPS2	0.0007783	0.170464	5.72e-07	1	0.0980392	1.26928
																					MPO	0.439697	0.00401117	0	0.137255	0.676471	1.25743
																					GINS2	0.184438	0.00484799	0.0163552	0.892157	0.137255	1.23505
																					IGHMBP2	0.12179	0.00492918	0	0.480392	0.617647	1.22476
																					MGLL	0.147091	0	0	0.166667	0.901961	1.21572
																					MCM2	0.188124	0.0266038	2.94e-06	0.186275	0.813725	1.21473
																					CXCL1	0.259335	0.0202939	0	0.490196	0.411765	1.18159
																					SDC4	0.05356	0.00397535	0	0.362745	0.735294	1.15557
																					CEP55	0.0804989	0.105755	0	0.539216	0.401961	1.12743
																					NFE2	0.0931353	0.0318255	0	0.107843	0.882353	1.11516
																					BHLHE41	0.0880819	0	0.00608724	0.656863	0.362745	1.11378
																					ASPM	0.0858772	0	0	0.686275	0.333333	1.10549
																					WEE1	0.0321647	0	0	0.352941	0.715686	1.10079
																					SSPN	0.297903	0.0149908	0	0.303922	0.480392	1.09721
																					CASP10	0.189532	0.0713607	0	0.715686	0.107843	1.08442
																					TNFRSF17	0.27121	0.110587	0	0.411765	0.284314	1.07788
																					SAMD9	0.0841031	0.0473865	0.00211021	0.333333	0.588235	1.05517
																					DUSP4	0.0732361	0	0.00013193	0.754902	0.215686	1.04396
																					MX2	0.0210296	0.031498	0	0.127451	0.862745	1.04272
																					MKI67	0.112937	0	0	0.156863	0.754902	1.0247
																					PTGS2	0.185231	0.0798525	0.00488065	0.254902	0.490196	1.01506
																					RBKS	0.0377517	0.0175618	0	0.401961	0.54902	1.00629
																					DAB2	0.0127804	0.00447104	0	0.72549	0.254902	0.997644
																					LGALS3BP	0.162884	0.00481861	0	0.205882	0.607843	0.981428
																					INHBA	0.383577	0.0179835	0.0168561	0.45098	0.0784314	0.947828
																					PKM	0.123866	0.0896559	0.00316753	0.460784	0.264706	0.94218
																					PRDM1	0.0502996	0.0562886	0	0.235294	0.598039	0.939922
																					CALD1	0.00557765	0.00250698	0	0.637255	0.27451	0.919849
																					MN1	0.0969377	0.0185998	0	0.147059	0.656863	0.919459
																					TSPO2	0.098958	0.0132947	2.43e-10	0.0588235	0.72549	0.896566
																					IL18	0.248552	0.0775036	0.0033761	0.5	0.0294118	0.858844
																					RPGR	0.279676	0.112484	0	0.343137	0.117647	0.852945
																					CCNB2	0.132004	0.0834674	0.00012254	0.588235	0.0392157	0.843045
																					BRCA1	0.12135	0.0224489	1.59e-07	0.647059	0	0.790858
																					SP110	0.0423643	0	0	0.264706	0.460784	0.767854
																					PDK4	0.222982	0.00979197	7.42e-18	0.0294118	0.441176	0.703362
																					TYMS	0.0355658	0.00482826	0	0.441176	0.205882	0.687453
																					PDK2	0.201709	0.0521604	0	0.0392157	0.352941	0.646026
																					TRAF1	0.281044	0.0337896	0	0.176471	0.147059	0.638363
																					RNASE3	0.047336	0	3.17e-16	0.372549	0.196078	0.615963
																					TNFAIP2	0.0979623	0.0121106	1.32e-06	0.421569	0.0686275	0.60027
																					IL16	0.0852162	0.01138	0.00094216	0.470588	0.00980392	0.57793
																					SERPIND1	0.169638	0.0987924	0	0.27451	0.0196078	0.562548
																					RFTN1	0.0773656	0.0144275	0	0.382353	0.0588235	0.53297
																					ISG20	0.175472	0.00614079	0	0.22549	0.0882353	0.495338
																					PAICS	0.0810613	0.0104353	0.00099037	0.0686275	0.313725	0.47484
																					PDK1	0.0938642	0.00939997	0.00043976	0.0490196	0.235294	0.388018
																					OLFM4	0.163232	0.00987364	0	0.0784314	0.127451	0.378988
																					PDPR	0.094021	0.029821	0	0.00980392	0.156863	0.290509
																					PDP2	0.0816235	0	0	0.0196078	0.176471	0.277702
																					ADGRE2	0.104128	0.10957	0	0	0.0490196	0.262717
																						LR	RF	ADB	GB	NB	Overall		Top 20 Genes
																					SDC1	1	1	1	1	0.22549	4.22549		AMPD3
																					SDHC	0.327666	0.564118	0	0.402258	0.686275	1.98032		CAMP
																					MCM10	0.421345	0.217147	0.375	0.0167367	0.941176	1.97141		CD38
																					EGR1	0.507908	0.49054	0.25	0.151072	0.539216	1.93874		EGR1
																					G6PD	0.271035	0.834152	0	0.0172867	0.764706	1.88718		FBXL2
																					FBXL2	0.29934	0.839683	0.125	1.73e-17	0.558824	1.82285		FCER2
																					MPO	0.495194	0.0318585	0.25	1.73e-17	0.921569	1.69862		G6PD
																					CD38	0.333454	0.0324444	0.5	1.73e-17	0.823529	1.68943		GBP4
																					GYPA	0.655677	0.0138891	0.25	1.73e-17	0.656863	1.57643		GYPA
																					MYBL2	0.421763	0.19894	0	1.73e-17	0.901961	1.52266		H6PD
																					PTTG1	0.541689	0.931762	0	0.0088329	0.0196078	1.50189		IGHMBP2
																					PTGS2	0.206693	0.110262	0.125	1.73e-17	1	1.44196		MCM10
																					OGDH	0.0955587	0.336715	0.125	1.73e-17	0.872549	1.42982		MPO
																					AMPD3	0.309385	0.303531	0.25	0.0125041	0.529412	1.40483		MYBL2
																					GBP4	0.608875	0.0536913	0	0.00107495	0.598039	1.26168		OGDH
																					FCER2	0.349828	0.00691686	0.125	1.73e-17	0.77451	1.25625		PDK2
																					PDK2	0.276099	0.0917874	0	1.73e-17	0.862745	1.23063		PTGS2
																					IGHMBP2	0.10863	0.0125171	0.125	1.73e-17	0.980392	1.22654		PTTG1
																					H6PD	0.119269	0.341909	0	1.73e-17	0.754902	1.21608		SDC1
																					CAMP	0.48302	0	0.125	1.73e-17	0.607843	1.21586		SDHC
																					E2F3	0.136945	0.0165428	0	0.00040028	0.990196	1.14408
																					ISG20	0.156997	0.00546344	0	1.73e-17	0.970588	1.13305
																					MGLL	0.196898	0.00172922	0	1.73e-17	0.931373	1.13
																					AURKA	0.200308	0.00282019	0.125	1.73e-17	0.794118	1.12225
																					TRAF1	0.280511	0.0316566	0	1.73e-17	0.803922	1.11609
																					HOMER2	0.0580751	0.185273	0.125	1.73e-17	0.745098	1.11345
																					BCL2A1	0.230144	0	0	1.73e-17	0.852941	1.08308
																					MX2	0.0208651	0.0156237	0.125	1.73e-17	0.911765	1.07325
																					EREG	0.131706	0	0.125	1.73e-17	0.813725	1.07043
																					GP1BA	0.296197	0.106331	0	1.73e-17	0.647059	1.04959
																					GMIP	0.136455	0.146093	0.125	1.75e-06	0.637255	1.0448
																					LGALS3BP	0.0646506	0.0156282	0	1.73e-17	0.960784	1.04106
																					THEMIS2	0.0743771	0.00448002	0	1.73e-17	0.95098	1.02984
																					TNFAIP2	0.113022	0.0106147	0	1.73e-17	0.892157	1.01579
																					SSPN	0.280511	0.0212981	0.125	1.73e-17	0.588235	1.01504
																					PRPS2	0.0469582	0.111959	0	1.73e-17	0.843137	1.00205
																					NFE2	0.0746165	0.0296273	0	1.73e-17	0.882353	0.986597
																					SDHAF3	0.436778	0.0255254	0	1.73e-17	0.519608	0.981911
																					TKTL1	0.171846	0.0155458	0	1.73e-17	0.784314	0.971706
																					VEGFA	0.195982	0.017706	0	1.73e-17	0.72549	0.939178
																					CS	0.180788	0.361328	0	1.73e-17	0.382353	0.924469
																					SERPIND1	0.207739	0.135322	0	1.73e-17	0.568627	0.911688
																					IFITM1	0.491428	0.418385	0	1.73e-17	0	0.909814
																					IL18	0.301336	0.106173	0.375	0.0547557	0.0588235	0.896088
																					PRDM1	0.0451602	0.0123377	0	1.73e-17	0.833333	0.890831
																					CDKN3	0.236081	0.0415423	0.25	1.73e-17	0.362745	0.890369
																					ADGRE2	0.0930687	0.0767531	0	1.73e-17	0.715686	0.885508
																					PDPR	0.078726	0.0926853	0	1.73e-17	0.705882	0.877294
																					RPGR	0.292587	0.0280216	0	1.73e-17	0.54902	0.869628
																					HP	0.117438	0.00970084	0	1.73e-17	0.735294	0.862433
																					SDHA	0.0615806	0.283762	0	1.73e-17	0.5	0.845343
																					ASAP1	0.120596	0.466296	0	1.73e-17	0.215686	0.802579
																					CCNB1	0.0980788	0.0954986	0.25	1.73e-17	0.323529	0.767107
																					MKI67	0.192785	0.28674	0.125	1.73e-17	0.156863	0.761387
																					CXCL1	0.227101	0.0392594	0	0.00026496	0.490196	0.756821
																					GINS2	0.12036	0.00842515	0	1.73e-17	0.627451	0.756236
																					RBKS	0.0159754	0.062747	0	1.73e-17	0.666667	0.745389
																					WEE1	0.042557	0.00549195	0	1.73e-17	0.696078	0.744127
																					IDH1	0.127074	0.0934723	0	0.00472932	0.509804	0.735079
																					HMMR	0.00192219	0.0196582	0	1.73e-17	0.676471	0.698051
																					CCNB2	0.194067	0.263975	0.125	0.0100207	0.0882353	0.681298
																					BHLHE41	0.085589	0.00374451	0	1.73e-17	0.578431	0.667765
																					CXCL8	0.19633	0	0	1.73e-17	0.460784	0.657115
																					GFI1B	0.0394603	0	0	1.73e-17	0.617647	0.657107
																					PDK4	0.201896	0.0212563	0.125	1.73e-17	0.303922	0.652074
																					MCM2	0.208463	0.17672	0.125	0.00241969	0.137255	0.649857
																					TNFRSF17	0.288276	0.00525317	0.125	1.73e-17	0.205882	0.624412
																					CEACAM6	0.247881	0	0	1.73e-17	0.372549	0.62043
																					DLAT	0.167117	0.0203608	0	1.73e-17	0.431373	0.61885
																					PKM	0.138499	0.0599218	0	1.73e-17	0.411765	0.610185
																					CLEC4C	0.527671	0.0427948	0	1.73e-17	0.0294118	0.599878
																					DUSP4	0.136246	0	0	1.73e-17	0.45098	0.587227
																					TSC22D1	0.133023	0.00907366	0	1.73e-17	0.441176	0.583273
																					INHBA	0.343371	0.00374451	0.125	1.73e-17	0.0784314	0.550547
																					CASP10	0.147732	0.0679005	0	1.73e-17	0.333333	0.548966
																					CDC20	0.049195	0.300802	0.125	1.73e-17	0.0686275	0.543624
																					ASPM	0.131543	0	0	0	0.401961	0.533503
																					PDK1	0.0955817	0.0345886	0.125	1.73e-17	0.264706	0.519876
																					IDO1	0.081346	0.00654897	0	1.73e-17	0.421569	0.509464
																					DAB2	0.0211488	0.00468064	0	1.73e-17	0.480392	0.506222
																					IFITM3	0.423826	0.0635927	0	1.73e-17	0.00980392	0.497223
																					CALD1	0.0148329	0	0	1.73e-17	0.470588	0.485421
																					CEP55	0.175694	0.263907	0	1.73e-17	0.0392157	0.478817
																					IFITM2	0.0328578	0.0259964	0	0.00140608	0.392157	0.452417
																					OLFM4	0.182507	0.00541152	0	1.73e-17	0.245098	0.433016
																					BRCA1	0.121399	0.0121904	0	1.73e-17	0.294118	0.427707
																					PDP2	0.0739424	0.00549576	0	1.73e-17	0.313725	0.393164
																					SP110	0.0237795	0	0	1.73e-17	0.352941	0.376721
																					PAICS	0.0905934	0.017526	0	1.73e-17	0.254902	0.363021
																					RPE	0.117301	0.0345839	0	0.0218497	0.186275	0.360009
																					OGDHL	0.0695246	0.0412644	0	1.73e-17	0.235294	0.346083
																					SLC4A1	0	0	0	1.73e-17	0.343137	0.343137
																					TSPO2	0.139328	0.0232417	0	1.73e-17	0.176471	0.33904
																					SAMD9	0.0207682	0.0259188	0	1.73e-17	0.27451	0.321197
																					TK1	0.150337	0.0397674	0	2.37e-05	0.127451	0.317579
																					SDC4	0.00590921	0.00279501	0	1.73e-17	0.284314	0.293018
																					MN1	0.0805897	0.00474088	0	0.012753	0.166667	0.26475
																					LDHB	0.0987506	0.0251753	0	1.73e-17	0.107843	0.231769
																					RNASE3	0.0533995	0.00941838	0	1.73e-17	0.147059	0.209877
																					TNFAIP3	0.00465737	0.00549937	0	1.73e-17	0.196078	0.206235
																					RFTN1	0.0428356	0	0	1.73e-17	0.117647	0.160483
																					TYMS	0.0177455	0.00545693	0	1.73e-17	0.0980392	0.121242
																					IL16	0.0617367	0	0	1.73e-17	0.0490196	0.110756
																						LR	RF	ADB	GB	KNN	Overall		Top 20 Genes
																					EGR1	0.479894	0.606916	0.833333	0.956519	0.980392	3.85705		AMPD3
																					SDC1	1	0.919732	1	0.137591	0.382353	3.43968		ASAP1
																					G6PD	0.298475	1	0	1	0.941176	3.23965		CAMP
																					ASAP1	0.142537	0.618251	0.5	0.725519	0.715686	2.70199		CCNB2
																					IFITM1	0.564118	0.604618	0	0	0.813725	1.98246		CD38
																					FBXL2	0.270488	0.695927	0	8.98e-07	0.960784	1.9272		CDKN3
																					AMPD3	0.30204	0.352572	0.333333	0	0.72549	1.71344		EGR1
																					SDHC	0.31439	0.780229	0.166667	0.00182033	0.362745	1.62585		FBXL2
																					CDKN3	0.278036	0.0768244	0.666667	1.45e-05	0.578431	1.59997		G6PD
																					CD38	0.348718	0.101554	0.333333	0.217027	0.598039	1.59867		GBP4
																					CAMP	0.596748	0.0172585	0.333333	8.8e-07	0.647059	1.5944		GMIP
																					GYPA	0.69258	0.00566404	0	0	0.882353	1.5806		GP1BA
																					GBP4	0.61235	0.0299118	0	0	0.931373	1.57363		GYPA
																					H6PD	0.120582	0.551388	0	0	0.872549	1.54452		H6PD
																					PTTG1	0.464659	0.6495	0.166667	0	0.235294	1.51612		IFITM1
																					GMIP	0.145147	0.244366	0.166667	0.00010291	0.901961	1.45824		IFITM3
																					TNFRSF17	0.345552	0.179296	0.5	0	0.411765	1.43661		PTTG1
																					CCNB2	0.18696	0.230353	0.333333	0.00283174	0.607843	1.36132		SDC1
																					GP1BA	0.335375	0.128303	0	0	0.892157	1.35583		SDHC
																					IFITM3	0.539323	0.0259975	0	0	0.784314	1.34963		TNFRSF17
																					CLEC4C	0.543878	0.0208994	0	0.217934	0.54902	1.33173
																					FCER2	0.311343	0	0	0	0.95098	1.26232
																					GINS2	0.122833	0.0236768	0.166667	0.0248265	0.911765	1.24977
																					DLAT	0.146275	0.0202667	0	0	0.990196	1.15674
																					IL18	0.294552	0.169426	0.166667	0.0244303	0.490196	1.14527
																					DUSP4	0.218434	0.0101522	0.166667	0.00019971	0.745098	1.14055
																					IDH1	0.14981	0.153956	0	0	0.833333	1.1371
																					CS	0.203886	0.384272	0	0	0.539216	1.12737
																					TRAF1	0.258806	0.0572172	0	0	0.803922	1.11994
																					MCM10	0.308173	0.0992178	0.5	0.0007637	0.205882	1.11404
																					TNFAIP2	0.0934971	0.0118	0	2.12e-06	1	1.1053
																					AURKA	0.21194	0.0180594	0.166667	8.96e-05	0.696078	1.09283
																					EREG	0.10047	0	0	0	0.970588	1.07106
																					HP	0.169961	0	0	2.56e-09	0.843137	1.0131
																					HOMER2	0.0498021	0.100683	0	0	0.852941	1.00343
																					IGHMBP2	0.0587078	0	0.166667	0	0.77451	0.999884
																					INHBA	0.457852	0.0253008	0	0.0162827	0.5	0.999436
																					E2F3	0.170861	0.047897	0	0.00381783	0.764706	0.987282
																					PTGS2	0.190783	0.205808	0.333333	0.0112053	0.245098	0.986228
																					SDHAF3	0.423766	0.0239726	0.166667	1.04e-10	0.343137	0.957543
																					HMMR	0.0824782	0.0116598	0	0	0.862745	0.956883
																					BCL2A1	0.246487	0.0118406	0	0.0070014	0.686275	0.951604
																					GFI1B	0.0203229	0.0092433	0	0	0.921569	0.951135
																					BRCA1	0.111627	0.104065	0	2.13e-07	0.666667	0.882358
																					IL16	0.0881671	0.0255703	0	0.00142618	0.754902	0.870066
																					CASP10	0.160292	0.0710354	0	8.44e-05	0.637255	0.868666
																					SDHA	0.0417048	0.566908	0	0	0.254902	0.863515
																					IDO1	0.0181339	0.0091812	0	1.35e-10	0.823529	0.850844
																					CDC20	0.0369214	0.0520187	0.166667	0	0.588235	0.843842
																					ASPM	0.126189	0	0	0	0.705882	0.832071
																					IFITM2	0.0213093	0.0147163	0	0	0.794118	0.830143
																					CEP55	0.102771	0.165772	0	0	0.558824	0.827367
																					RPGR	0.297591	0.106148	0	0.00062488	0.421569	0.825933
																					BHLHE41	0.139284	0	0	0.00921444	0.676471	0.824969
																					MPO	0.450747	0.0602431	0.166667	0	0.147059	0.824715
																					CALD1	0.161304	0	0	0	0.656863	0.818167
																					CXCL1	0.259196	0.0106906	0	0.00060728	0.529412	0.799906
																					VEGFA	0.254724	0.0188604	0.166667	0	0.352941	0.793192
																					CCNB1	0.0784812	0.0958188	0	0	0.617647	0.791947
																					DAB2	0.0200971	0.00938933	0	0	0.735294	0.764781
																					CEACAM6	0.17437	0.0100131	0	0	0.568627	0.753011
																					CXCL8	0.15812	0.0295034	0	5.62e-09	0.519608	0.707231
																					TSPO2	0.159225	0.0283557	0	7.33e-05	0.509804	0.697458
																					WEE1	0.0268584	0.00860522	0	0.0293225	0.627451	0.692237
																					RPE	0.148111	0.0391167	0	0.0259512	0.431373	0.644551
																					OGDH	0.0987333	0.253204	0.166667	0	0.117647	0.636251
																					SAMD9	0.0823679	0.142394	0	0.00319856	0.401961	0.629921
																					NFE2	0.111865	0.0240597	0	0.0088092	0.480392	0.625126
																					ISG20	0.118837	0.0230122	0	0	0.470588	0.612438
																					SERPIND1	0.163026	0.122757	0	0	0.323529	0.609312
																					RFTN1	0.108223	0.015341	0	9.32e-06	0.460784	0.584358
																					SDC4	0.161898	0.0464108	0	0	0.372549	0.580858
																					MYBL2	0.408529	0.0296255	0	0.00054454	0.127451	0.56615
																					SSPN	0.258993	0.00842488	0	0	0.294118	0.561535
																					RNASE3	0.0890815	0.0104905	0	4.8e-16	0.45098	0.550552
																					PKM	0.121684	0.0685866	0.333333	7.81e-06	0.0196078	0.543219
																					TK1	0.234074	0.026239	0	0.00010234	0.27451	0.534925
																					TKTL1	0.140925	0.0335446	0	0	0.333333	0.507803
																					TYMS	0.0591824	0.00646016	0	6.92e-07	0.441176	0.50682
																					MCM2	0.187066	0.112693	0	4.5e-06	0.196078	0.495842
																					SLC4A1	2.99e-06	0.00406903	0.166667	0	0.313725	0.484464
																					TSC22D1	0.0694116	0	0	0	0.392157	0.461568
																					MKI67	0.16999	0.115181	0	0	0.166667	0.451838
																					MGLL	0.239984	0.00697851	0	0.00066566	0.186275	0.433903
																					LGALS3BP	0.132944	0.0390788	0	0	0.215686	0.387709
																					THEMIS2	0.052678	0.010069	0	0	0.284314	0.347061
																					SP110	0	0.033794	0	0	0.303922	0.337716
																					PRPS2	0.00786313	0.220987	0	3.89e-09	0.107843	0.336693
																					RBKS	0.0166646	0.0329173	0	0	0.264706	0.314288
																					LDHB	0.0528432	0.0307613	0	0	0.22549	0.309095
																					PDK2	0.158909	0.0797399	0	0	0.0588235	0.297473
																					PDPR	0.108769	0.123336	0	0	0.0294118	0.261517
																					PDK4	0.212168	0	0	1.12e-17	0.0490196	0.261188
																					MN1	0.0947274	0	0	8.49e-09	0.156863	0.25159
																					TNFAIP3	0.060502	0.00566719	0	0	0.176471	0.24264
																					OGDHL	0.100428	0.0326668	0	0	0.0980392	0.231134
																					ADGRE2	0.102299	0.0981912	0	0	0	0.20049
																					PDK1	0.0980199	0.00599369	0	1.37e-08	0.0686275	0.172641
																					MX2	0.0194948	0.0116094	0	0	0.137255	0.168359
																					OLFM4	0.0706287	0.0059571	0	0	0.0882353	0.164821
																					PAICS	0.0616137	0.00978923	0	0.00097695	0.0784314	0.150811
																					PRDM1	0.0506313	0.068115	0	0	0.00980392	0.12855
																					PDP2	0.083017	0.00410813	0	0	0.0392157	0.126341
																						LR	RF	DTREE	ADB	GB	Overall		Top 20 Genes
																					PTTG1	0.710756	1	1	0.125	1	3.83576		AMPD3
																					SDC1	1	0.625054	0.113888	1	0.113888	2.85283		ASAP1
																					EGR1	0.534226	0.429361	0	0.375	0	1.33859		CAMP
																					AMPD3	0.350299	0.348885	0	0.375	0.0594801	1.13366		CD38
																					G6PD	0.348234	0.643323	0	0.125	0	1.11656		CDKN3
																					CDKN3	0.299176	0.0057164	0	0.75	0	1.05489		EGR1
																					FBXL2	0.291266	0.705049	0	0	0	0.996316		FBXL2
																					IFITM1	0.499066	0.471416	0	0	0	0.970482		G6PD
																					MCM10	0.435376	0.247542	0	0.25	0	0.932918		GBP4
																					MKI67	0.293527	0.369833	0	0.25	0	0.91336		GYPA
																					CAMP	0.643276	0.088248	0	0.125	0	0.856524		IFITM1
																					GBP4	0.677018	0.0272219	0.114174	0	0.0236912	0.842104		MCM10
																					CD38	0.374908	0.0700663	0	0.375	0	0.819974		MCM2
																					SDHC	0.359856	0.436583	0	0	0	0.796439		MKI67
																					MCM2	0.246573	0.168132	0	0.375	0	0.789706		MPO
																					SDHAF3	0.553872	0.0783176	0	0.125	0	0.75719		PTTG1
																					MPO	0.584259	0.0304684	0	0.125	0	0.739728		SDC1
																					GYPA	0.687762	0.0495635	0	0	0	0.737325		SDHAF3
																					ASAP1	0.161567	0.446324	0	0.125	0	0.732892		SDHC
																					VEGFA	0.273316	0.0411895	0	0.375	0	0.689506		VEGFA
																					CLEC4C	0.615934	0.0373935	0	0	0	0.653327
																					FCER2	0.388044	0.00442464	0	0.25	0	0.642468
																					IL18	0.336512	0.114447	0	0.125	0.0310023	0.606962
																					IFITM3	0.560503	0.00845068	0	0	0	0.568954
																					H6PD	0.14004	0.427006	0	0	0	0.567046
																					INHBA	0.494746	0.0230989	0	0	0	0.517845
																					MYBL2	0.482903	0.0322506	0	0	0	0.515154
																					BCL2A1	0.363193	0.00424084	0	0.125	0	0.492434
																					E2F3	0.205154	0.0307527	0	0.25	0	0.485907
																					GMIP	0.20716	0.276425	0	0	0	0.483585
																					GP1BA	0.370107	0.0802626	0	0	0	0.450369
																					CASP10	0.165839	0.0096373	0	0.25	0	0.425476
																					TNFRSF17	0.388273	0.0118928	0	0	0	0.400166
																					CEP55	0.187868	0.208157	0	0	0	0.396026
																					RPGR	0.301691	0.0866921	0	0	0	0.388383
																					AURKA	0.243064	0.0129087	0	0.125	1.70227e-17	0.380972
																					CXCL1	0.312507	0.0525181	0	0	0	0.365025
																					CDC20	0.10128	0.244264	0	0	0	0.345544
																					CEACAM6	0.338891	0	0	0	0	0.338891
																					CS	0.186254	0.139032	0	0	0	0.325286
																					CCNB2	0.222408	0.0734574	0	0	0	0.295866
																					PKM	0.130746	0.0389484	0	0.125	0	0.294695
																					ASPM	0.224542	0.0664046	0	0	6.19007e-19	0.290947
																					PDK2	0.220137	0.0646931	0	0	0	0.28483
																					PTGS2	0.201069	0.0800993	0	0	0	0.281168
																					DUSP4	0.281166	0	0	0	0	0.281166
																					TRAF1	0.253488	0.0213616	0	0	0	0.27485
																					SERPIND1	0.188556	0.0835257	0	0	0	0.272082
																					MGLL	0.258076	0.00822553	0	0	0	0.266302
																					PDK4	0.257999	0.00385158	0	0	0	0.261851
																					SDHA	0.046829	0.196248	0	0	0	0.243077
																					OGDH	0.104799	0.129336	0	0	0	0.234135
																					EREG	0.219778	0.00447848	0	0	0	0.224256
																					SDC4	0.220307	0.00237285	0	0	0	0.222679
																					TK1	0.205481	0.0118554	0	0	0	0.217336
																					SSPN	0.196985	0.0128374	0	0	0	0.209822
																					TKTL1	0.186697	0.0131978	0	0	0	0.199895
																					TSPO2	0.197722	0	0	0	0	0.197722
																					TYMS	0.188596	0.0046111	0	0	0	0.193207
																					ADGRE2	0.132848	0.0597615	0	0	0	0.192609
																					RFTN1	0.174327	0.0178517	0	0	0	0.192178
																					PRPS2	0.00524884	0.185698	0	0	0	0.190946
																					RPE	0.172763	0.00441383	0	0	0	0.177177
																					TNFAIP2	0.147516	0.0252853	0	0	0	0.172801
																					DLAT	0.141041	0.0217817	0	0	0	0.162823
																					BHLHE41	0.142182	0.0139283	0	0	0	0.15611
																					IGHMBP2	0.0274314	0	0	0.125	0	0.152431
																					PDPR	0.0778337	0.0676773	0	0	0	0.145511
																					MN1	0.141811	0	0	0	0	0.141811
																					PDK1	0.1402	0	0	0	0	0.1402
																					NFE2	0.0711795	0.0653797	0	0	0	0.136559
																					BRCA1	0.123427	0	0	0	0	0.123427
																					IDH1	0.110694	0.00918911	0	0	0	0.119883
																					CALD1	0.118377	0	0	0	0	0.118377
																					IL16	0.0812547	0.0264124	0	0	0	0.107667
																					OLFM4	0.105094	0	0	0	0	0.105094
																					DAB2	0.0905388	0.0131309	0	0	0	0.10367
																					GINS2	0.0947942	0.00854226	0	0	0	0.103336
																					CCNB1	0.102512	0	0	0	0	0.102512
																					HP	0.0830358	0.0180791	0	0	0	0.101115
																					LGALS3BP	0.0948357	0.00461388	0	0	0	0.0994495
																					PDP2	0.0975427	0	0	0	0	0.0975427
																					MX2	0.0837838	0.0127152	0	0	0	0.096499
																					SP110	0.0553535	0.0410147	0	0	0	0.0963682
																					ISG20	0.0917508	0	0	0	0	0.0917508
																					WEE1	0.0829385	0	0	0	0	0.0829385
																					RNASE3	0.069237	0.0129495	0	0	0	0.0821865
																					PRDM1	0.0672392	0.00887812	0	0	0	0.0761173
																					RBKS	0.0427219	0.0295134	0	0	0	0.0722353
																					HMMR	0.0583787	0.0135591	0	0	0	0.0719379
																					TNFAIP3	0.0608554	0.00922909	0	0	0	0.0700845
																					HOMER2	0.0491235	0.0136124	0	0	0	0.0627359
																					SLC4A1	0.0592784	0	0	0	0	0.0592784
																					PAICS	0.0589603	0	0	0	0	0.0589603
																					IFITM2	0.0411741	0.00466003	0	0	0	0.0458342
																					THEMIS2	0.0300212	0.0151594	0	0	0	0.0451806
																					CXCL8	0.0263826	0.0182734	0	0	0	0.044656
																					TSC22D1	0.0220249	0.0189017	0	0	0	0.0409266
																					OGDHL	0.0146256	0.0137928	0	0	0	0.0284184
																					IDO1	0.00133772	0.0253706	0	0	0	0.0267083
																					SAMD9	0	0.0183121	0	0	0	0.0183121
																					LDHB	0.00641099	0.00929839	0	0	0	0.0157094
																					GFI1B	0.000909618	0.0142612	0	0	0	0.0151708
																						LR	RF	ADB	KNN	NB	Overall		Top 20 Genes
																					EGR1	0.542253	0.423645	0.666667	0.72549	0.892157	3.25021		AMPD3
																					SDC1	1	0.445829	1	0.431373	0.137255	3.01446		ASAP1
																					G6PD	0.308401	1	0.333333	0.5	0.823529	2.96526		CCNB2
																					AMPD3	0.309783	0.331547	0.666667	0.813725	0.637255	2.75898		CDKN3
																					FBXL2	0.280583	0.610483	0	0.794118	0.686275	2.37146		CS
																					PTTG1	0.495328	0.768695	0.166667	0.352941	0.578431	2.36206		CXCL1
																					SDHC	0.33495	0.349469	0.5	0.686275	0.362745	2.23344		DLAT
																					MYBL2	0.415673	0.0280938	0	0.852941	0.803922	2.10063		DUSP4
																					GP1BA	0.313459	0.101305	0	0.843137	0.745098	2.003		EGR1
																					IFITM3	0.479373	0.0641947	0.166667	0.95098	0.323529	1.98474		FBXL2
																					INHBA	0.427307	0.0217079	0.333333	0.980392	0.215686	1.97843		G6PD
																					CDKN3	0.268397	0.0765974	0.666667	0.529412	0.431373	1.97245		GP1BA
																					DLAT	0.154991	0	0	0.882353	0.931373	1.96872		HOMER2
																					CCNB2	0.212862	0.219433	0.333333	0.735294	0.460784	1.96171		IFITM3
																					DUSP4	0.0985009	0.00324703	0	0.911765	0.921569	1.93508		INHBA
																					CS	0.199756	0.274919	0	0.764706	0.676471	1.91585		MYBL2
																					PDK4	0.226906	0	0	0.960784	0.72549	1.91318		PDK4
																					CXCL1	0.310534	0.0115901	0	0.833333	0.705882	1.86134		PTTG1
																					ASAP1	0.144348	0.714177	0.333333	0.0392157	0.627451	1.85852		SDC1
																					HOMER2	0.0411011	0.0180556	0	0.784314	1	1.84347		SDHC
																					MCM2	0.227345	0.0323866	0.166667	0.745098	0.656863	1.82836
																					TNFRSF17	0.30757	0.041378	0.166667	0.627451	0.666667	1.80973
																					IFITM1	0.51855	0.307691	0	0.931373	0.0392157	1.79683
																					PDK1	0.0942273	0.0304797	0	0.921569	0.735294	1.78157
																					TRAF1	0.279157	0.0183472	0	0.637255	0.843137	1.7779
																					MGLL	0.159291	0.00550537	0	0.754902	0.852941	1.77264
																					MN1	0.0267374	0.00468386	0	0.823529	0.901961	1.75691
																					FCER2	0.326668	0.0126726	0.166667	0.372549	0.862745	1.7413
																					CASP10	0.173955	0.0542559	0	0.519608	0.990196	1.73801
																					WEE1	0.0338237	0.00233753	0	1	0.696078	1.73224
																					PKM	0.133581	0.0544669	0.5	0.647059	0.382353	1.71746
																					GBP4	0.672744	0.0506212	0	0.166667	0.813725	1.70376
																					MX2	0.020219	0.021896	0	0.705882	0.95098	1.69898
																					CAMP	0.566985	0.00793751	0.166667	0.421569	0.529412	1.69257
																					GYPA	0.73564	0.0365129	0	0.196078	0.715686	1.68392
																					E2F3	0.163267	0.0184186	0	0.588235	0.911765	1.68169
																					BCL2A1	0.245033	0	0	0.862745	0.568627	1.67641
																					OGDH	0.0950883	0.17395	0	0.872549	0.5	1.64159
																					OGDHL	0.123755	0.00833384	0	0.892157	0.607843	1.63209
																					TKTL1	0.146881	0.00888544	0	0.598039	0.872549	1.62635
																					H6PD	0.145031	0.469041	0	0.156863	0.833333	1.60427
																					PRPS2	0	0.120191	0.166667	0.313725	0.970588	1.57117
																					OLFM4	0.123134	0	0	0.901961	0.519608	1.5447
																					BRCA1	0.14985	0.022876	0	0.803922	0.539216	1.51586
																					AURKA	0.252281	0.0135744	0.166667	0.480392	0.598039	1.51095
																					MPO	0.45969	0.0167209	0	0.0686275	0.941176	1.48621
																					CD38	0.380715	0.0619069	0	0.568627	0.45098	1.46223
																					RPGR	0.305812	0.0906738	0	0.245098	0.794118	1.4357
																					GMIP	0.172463	0.243483	0	0.205882	0.754902	1.37673
																					PDK2	0.209581	0.0683295	0	0.941176	0.127451	1.34654
																					PTGS2	0.202037	0.230253	0.333333	0.333333	0.245098	1.34405
																					EREG	0.121723	0	0	0.323529	0.882353	1.32761
																					CXCL8	0.255724	0.00471673	0	0.0490196	0.980392	1.28985
																					CALD1	0.00413905	0	0	0.617647	0.647059	1.26884
																					SDHA	0.0542848	0.438715	0	0.45098	0.313725	1.25771
																					SLC4A1	0.0177017	0.0144735	0	0.990196	0.235294	1.25767
																					SDHAF3	0.430294	0.0134719	0.333333	0.460784	0.00980392	1.24769
																					CLEC4C	0.570637	0.093936	0.166667	0	0.401961	1.2332
																					LDHB	0.0965396	0.0289849	0	0.77451	0.284314	1.18435
																					CEP55	0.18298	0.222885	0	0.254902	0.509804	1.17057
																					ASPM	0.131966	0.00904487	0	0.411765	0.617647	1.17042
																					GINS2	0.10462	0.0262281	0	0.264706	0.764706	1.16026
																					IL16	0.0941485	0.0277594	0	0.970588	0.0588235	1.15132
																					CCNB1	0.0567333	0.0209576	0	0.54902	0.480392	1.1071
																					CEACAM6	0.125942	0.0044526	0	0.558824	0.411765	1.10098
																					VEGFA	0.205416	0.0317005	0.333333	0.490196	0.0196078	1.08025
																					TNFAIP2	0.0794467	0.0117006	0	0.607843	0.343137	1.04213
																					DAB2	0.0196831	0.0286604	0	0.0294118	0.960784	1.03854
																					IL18	0.291383	0.124702	0.166667	0.27451	0.156863	1.01412
																					TK1	0.211438	0.00886142	0	0.578431	0.205882	1.00461
																					TNFAIP3	0.0553536	0.00446522	0	0.147059	0.784314	0.991191
																					CDC20	0.0439516	0.16211	0.166667	0.176471	0.441176	0.990376
																					RBKS	0.0128789	0.0257772	0	0.362745	0.588235	0.989636
																					LGALS3BP	0.147248	0.0093576	0	0.715686	0.107843	0.980135
																					TYMS	0.0361629	0.0129505	0	0.666667	0.254902	0.970682
																					PRDM1	0.0639248	0.0209293	0	0.676471	0.186275	0.947599
																					PDPR	0.0977176	0.0119258	0	0.696078	0.117647	0.923369
																					GFI1B	0.00868943	0.0308272	0	0.107843	0.77451	0.92187
																					RPE	0.164503	0.0111199	0	0.401961	0.333333	0.910917
																					HMMR	0.0248992	0.018083	0	0.470588	0.392157	0.905727
																					RNASE3	0.0639565	0.0199238	0	0.392157	0.421569	0.897606
																					SERPIND1	0.189246	0.113248	0	0.22549	0.352941	0.880926
																					TSPO2	0.142749	0	0	0.656863	0.0686275	0.868239
																					SSPN	0.313231	0.0168666	0	0.215686	0.303922	0.849705
																					IGHMBP2	0.145984	0.00475175	0.166667	0.343137	0.176471	0.83701
																					SP110	0.0325006	0.0131567	0	0.509804	0.27451	0.829971
																					SAMD9	0.0828791	0.0403764	0	0.235294	0.470588	0.829138
																					MCM10	0.360887	0.0824361	0	0.0980392	0.264706	0.806069
																					THEMIS2	0.0695595	0.0125767	0	0.186275	0.490196	0.758607
																					TSC22D1	0.144592	0.00584465	0	0.294118	0.294118	0.738672
																					BHLHE41	0.0571023	0.01609	0	0.0882353	0.558824	0.720251
																					MKI67	0.162285	0.124825	0	0.303922	0.0784314	0.669462
																					SDC4	0.0510882	0.00958363	0	0.441176	0.147059	0.648907
																					PAICS	0.0677227	0	0	0.00980392	0.54902	0.626546
																					IDO1	0.0328133	0.0122778	0	0.539216	0.0294118	0.613719
																					IDH1	0.172933	0.0973987	0	0.117647	0.196078	0.584057
																					RFTN1	0.0990217	0	0	0.382353	0.0882353	0.56961
																					HP	0.157608	0.00766086	0	0.0196078	0.372549	0.557426
																					ADGRE2	0.112204	0.0874817	0	0.284314	0	0.484
[truncated: 108 more rows]
